# Supplementary material for: Histone Modifications Are Associated with Transcript Isoform Diversity in Normal and Cancer Cells
Source: PLoS Comput Biol. 2014 Jun 5;10(6):e1003611. doi: 10.1371/journal.pcbi.1003611 (PMC4046914; doi:10.1371/journal.pcbi.1003611)
Supplement: Dataset S1 — This workbook contains 11 sheets with leave-one-out cross-validation candidate genes and 1 sheet with a union of all 840 candidate genes from leave-one-out cross-validations. Individual cross-validation candidate gene data is named after the cell line analyzed. P-values are corrected for multiple testing using FDR. Comparison categories 0 vs 1, 0 vs >0, and 1 vs <1 represent combinations tested given the scenario, where each exon may be constitutively excluded (TSSIR = 0 and SEIR = 0), occasionally excluded (TSSIR>0 and SEIR<1), or retained (TSSIR = 1 and SEIR = 1). The “SplicingOrTsss” column then differentiates whether a given comparison category corresponds to transcription start site switching or splicing. Note that column “Statistic” frequently contains value “-Inf”; this refers to the case for comparisons where one of the groups has an enrichment of 0, ie. no histone mark enrichment. (XLSX) [file pcbi.1003611.s001.xlsx]

## Sheet: Legend
Supplemtary Dataset S1 Legend
This workbook contains 11 sheets with leave-one-out crossvalidation candidate genes and 1 sheet with a union of all 840 candidate genes from leave-one-out crossvalidations. Individual crossvalidation candidate gene data is named after the cell line analyzed. P-values are corrected for multiple testing using FDR. Comparison categories 0 vs 1, 0 vs > 0, and 1 vs < 1 represent combinations tested gi…

## Sheet: CandidateGenes
GeneID	Cancer
A2LD1	FALSE
AADAT	FALSE
ABCC10	FALSE
ABCG1	FALSE
ABI1	FALSE
ABL1	TRUE
ABR	FALSE
ACACA	FALSE
ACBD5	FALSE
ACCN1	FALSE
ACPL2	FALSE
ACSL6	FALSE
ACTA2	FALSE
ACTR3C	FALSE
AGAP11	FALSE
AGL	FALSE
AGTR1	FALSE
AHI1	FALSE
AHRR	FALSE
AIRE	FALSE
AK3	FALSE
ALOXE3	FALSE
ALS2CR4	FALSE
ALS2CR8	FALSE
ANGPTL4	FALSE
ANK2	FALSE
ANK3	FALSE
ANKHD1	FALSE
ANKRD13D	FALSE
ANKRD28	FALSE
ANXA2	FALSE
AOAH	FALSE
AP1M1	FALSE
AP3S2	FALSE
APAF1	FALSE
APC	TRUE
API5	FALSE
APLP2	FALSE
AR	FALSE
ARHGAP23	FALSE
ARHGAP27	FALSE
ARHGDIA	FALSE
ARHGEF1	FALSE
ARHGEF10L	FALSE
ARHGEF3	FALSE
ARL2	FALSE
ARMCX6	FALSE
ARPC4	FALSE
AS3MT	FALSE
ASB3	FALSE
ASGR2	FALSE
ATAD3A	FALSE
ATF7	FALSE
ATP13A2	FALSE
ATP2A2	FALSE
ATP5L	FALSE
ATP5SL	FALSE
ATP8B2	FALSE
ATXN10	FALSE
B3GALNT1	FALSE
BAX	FALSE
BBC3	FALSE
BBIP1	FALSE
BCAR1	FALSE
BCAT2	FALSE
BCO2	FALSE
BDH1	FALSE
BEST1	FALSE
BEX5	FALSE
BGLAP	FALSE
BIRC5	FALSE
BIVM	FALSE
BMX	FALSE
BRCA1	TRUE
BTN2A2	FALSE
BVES	FALSE
C10orf26	FALSE
C11orf17	FALSE
C13orf23	FALSE
C14orf80	FALSE
C18orf1	FALSE
C19orf12	FALSE
C19orf6	FALSE
C1orf94	FALSE
C2	FALSE
C21orf125	FALSE
C21orf56	FALSE
C2orf63	FALSE
C3orf18	FALSE
C3orf37	FALSE
C4orf33	FALSE
C5orf33	FALSE
C5orf45	FALSE
C6orf155	FALSE
C6orf203	FALSE
C6orf52	FALSE
C8orf47	FALSE
C8orf83	FALSE
CA7	FALSE
CAB39L	FALSE
CABYR	FALSE
CACNB4	FALSE
CALCR	FALSE
CALD1	FALSE
CAMK2G	FALSE
CAMKK1	FALSE
CAPN10	FALSE
CAPN2	FALSE
CASKIN2	FALSE
CASP12	FALSE
CASR	FALSE
CAV2	FALSE
CBS	FALSE
CBX1	FALSE
CBX5	FALSE
CC2D2A	FALSE
CCBL1	FALSE
CCDC46	FALSE
CCDC77	FALSE
CCNA1	FALSE
CCND3	TRUE
CCR6	FALSE
CD302	FALSE
CD320	FALSE
CD44	FALSE
CDC14B	FALSE
CDC42SE2	FALSE
CDC7	FALSE
CDH17	FALSE
CDK1	FALSE
CDKN2A	FALSE
CDKN3	FALSE
CENPL	FALSE
CES3	FALSE
CES5A	FALSE
CHPF	FALSE
CINP	FALSE
CIT	FALSE
CKAP5	FALSE
CLCF1	FALSE
CLDN11	FALSE
CLDN14	FALSE
CLDN7	FALSE
CLEC4M	FALSE
CLEC7A	FALSE
CLK1	FALSE
CLTA	FALSE
CMKLR1	FALSE
CNNM3	FALSE
COL12A1	FALSE
COL13A1	FALSE
COL17A1	FALSE
COL4A6	FALSE
CPLX2	FALSE
CPPED1	FALSE
CRABP2	FALSE
CRAT	FALSE
CRCP	FALSE
CREB5	FALSE
CRELD2	FALSE
CREM	FALSE
CRLS1	FALSE
CSAG1	FALSE
CSRP1	FALSE
CTAGE5	FALSE
CTBP2	FALSE
CTNNBIP1	FALSE
CTTN	FALSE
CYB561	FALSE
CYB561D1	FALSE
CYBASC3	FALSE
CYLD	TRUE
CYP3A5	FALSE
DAG1	FALSE
DAGLB	FALSE
DALRD3	FALSE
DAZAP1	FALSE
DBI	FALSE
DCLK1	FALSE
DCTN4	FALSE
DCTN5	FALSE
DDAH1	FALSE
DEPDC1	FALSE
DEPDC5	FALSE
DGKZ	FALSE
DHRS4L2	FALSE
DHRS9	FALSE
DIDO1	FALSE
DIP2A	FALSE
DIS3L	FALSE
DLG3	FALSE
DLK2	FALSE
DMKN	FALSE
DNAJB5	FALSE
DNAJC7	FALSE
DNMT3A	TRUE
DNMT3B	FALSE
DOCK9	FALSE
DOK1	FALSE
DOK3	FALSE
DPH2	FALSE
DPY19L2P2	FALSE
DPY19L3	FALSE
DPYSL3	FALSE
DTHD1	FALSE
DTNBP1	FALSE
DUSP10	FALSE
DUSP15	FALSE
DUSP4	FALSE
DYRK3	FALSE
ECE1	FALSE
ECE2	FALSE
ECSIT	FALSE
ECT2L	TRUE
EEF1D	FALSE
EFHC1	FALSE
EIF2B4	FALSE
EIF4E	FALSE
EIF4ENIF1	FALSE
EIF4G1	FALSE
ELAVL2	FALSE
EMX2	FALSE
EPB41L1	FALSE
EPN2	FALSE
ERG	TRUE
ERLIN2	FALSE
ESR1	FALSE
ETS1	FALSE
ETV1	TRUE
ETV4	TRUE
EVI5L	FALSE
EWSR1	TRUE
EXD2	FALSE
EXO1	FALSE
EXT2	TRUE
F8	FALSE
FAIM	FALSE
FAM102A	FALSE
FAM111B	FALSE
FAM114A1	FALSE
FAM119A	FALSE
FAM131A	FALSE
FAM131B	FALSE
FAM133B	FALSE
FAM134B	FALSE
FAM189A2	FALSE
FAM198B	FALSE
FAM3A	FALSE
FAM53C	FALSE
FAM54B	FALSE
FAM59B	FALSE
FAM63A	FALSE
FAM86C	FALSE
FAS	FALSE
FASTKD5	FALSE
FBXL13	FALSE
FBXW11	FALSE
FBXW7	TRUE
FES	FALSE
FGF1	FALSE
FGFR1	TRUE
FHL2	FALSE
FLJ34690	FALSE
FOXJ3	FALSE
FOXM1	FALSE
FOXRED1	FALSE
FRMD6	FALSE
FTSJ1	FALSE
FYTTD1	FALSE
FZD6	FALSE
FZR1	FALSE
G6PC3	FALSE
G6PD	FALSE
GABRA2	FALSE
GADD45A	FALSE
GAS6	FALSE
GATA2	TRUE
GCNT1	FALSE
GCNT2	FALSE
GFI1	FALSE
GGCT	FALSE
GGPS1	FALSE
GHDC	FALSE
GJA9	FALSE
GLB1	FALSE
GLIS3	FALSE
GLRB	FALSE
GLRX2	FALSE
GLUL	FALSE
GNAL	FALSE
GNGT2	FALSE
GNLY	FALSE
GOLGA7	FALSE
GOLM1	FALSE
GPATCH8	FALSE
GPM6A	FALSE
GPR89A	FALSE
GPT2	FALSE
GRAMD3	FALSE
GRB7	FALSE
GSN	FALSE
GSR	FALSE
GTF2H2C	FALSE
GTPBP3	FALSE
GTPBP8	FALSE
GUCY1A3	FALSE
GUK1	FALSE
GYS1	FALSE
HAGH	FALSE
HAS3	FALSE
HDAC2	FALSE
HDHD1	FALSE
HEPH	FALSE
HK1	FALSE
HMOX2	FALSE
HN1	FALSE
HPS4	FALSE
HPSE2	FALSE
HSD11B1L	FALSE
HSPC157	FALSE
HSPD1	FALSE
HYLS1	FALSE
ICA1	FALSE
IFLTD1	FALSE
IFT122	FALSE
IFT88	FALSE
IKZF2	FALSE
IL15RA	FALSE
IL18BP	FALSE
IL1R2	FALSE
IL21R	TRUE
IL22RA2	FALSE
IMPDH1	FALSE
INSIG1	FALSE
INSR	FALSE
IP6K1	FALSE
IQCG	FALSE
IQSEC2	FALSE
IRF3	FALSE
ISYNA1	FALSE
ITGA1	FALSE
ITGA7	FALSE
ITGB1	FALSE
ITIH5	FALSE
ITM2A	FALSE
ITM2C	FALSE
IZUMO4	FALSE
JUB	FALSE
KATNAL1	FALSE
KCNIP2	FALSE
KCNIP3	FALSE
KCNK2	FALSE
KCNN3	FALSE
KCNQ1	FALSE
KCTD1	FALSE
KDM4C	FALSE
KHSRP	FALSE
KIAA0182	FALSE
KIAA0226	FALSE
KIAA0748	FALSE
KIAA1191	FALSE
KIAA1217	FALSE
KIAA1522	FALSE
KIF21A	FALSE
KIF9	FALSE
KIFC3	FALSE
KLC1	FALSE
KLHL2	FALSE
KLHL5	FALSE
KLK6	FALSE
KTN1	TRUE
L3MBTL3	FALSE
LAT	FALSE
LCK	TRUE
LEF1	FALSE
LETM2	FALSE
LGALS8	FALSE
LIFR	TRUE
LIMA1	FALSE
LIMS1	FALSE
LIPT1	FALSE
LITAF	FALSE
LMF1	FALSE
LMO7	FALSE
LOC100131176	FALSE
LOC100132215	FALSE
LOC100133991	FALSE
LOC100288974	FALSE
LOC100506581	FALSE
LOC100507217	FALSE
LOC284749	FALSE
LOC285501	FALSE
LOC285972	FALSE
LOC339524	FALSE
LOC401164	FALSE
LOC404266	FALSE
LOC440028	FALSE
LOC440354	FALSE
LOC441869	FALSE
LOC646982	FALSE
LOC729082	FALSE
LOX	FALSE
LOXHD1	FALSE
LPO	FALSE
LPXN	FALSE
LRBA	FALSE
LRP12	FALSE
LRRC20	FALSE
LRRC29	FALSE
LRRC8A	FALSE
LRRC8B	FALSE
LSP1	FALSE
LTBP4	FALSE
LTF	FALSE
LY6H	FALSE
LYSMD2	FALSE
MAD2L1BP	FALSE
MAEA	FALSE
MAGEB1	FALSE
MAGED1	FALSE
MAP1LC3A	FALSE
MAP2	FALSE
MAP3K4	FALSE
MAP7	FALSE
MAP7D2	FALSE
MAPK10	FALSE
MAPK7	FALSE
MAPK8IP3	FALSE
MAPRE2	FALSE
MARCH1	FALSE
MARCH10	FALSE
MATK	FALSE
MBNL1	FALSE
MCC	FALSE
MCF2L	FALSE
MCRS1	FALSE
MCTS1	FALSE
MFAP2	FALSE
MGLL	FALSE
MIAT	FALSE
MIB2	FALSE
MIR4315-1	FALSE
MIR943	FALSE
MITF	TRUE
MKI67	FALSE
MKKS	FALSE
MKS1	FALSE
MLC1	FALSE
MOB2	FALSE
MON1B	FALSE
MORN4	FALSE
MRAS	FALSE
MRPL49	FALSE
MRPL55	FALSE
MS4A12	FALSE
MT1DP	FALSE
MTF2	FALSE
MTFP1	FALSE
MTFR1	FALSE
MTX3	FALSE
MUSK	FALSE
MUTYH	TRUE
MYLK	FALSE
NADK	FALSE
NAE1	FALSE
NARF	FALSE
NAV1	FALSE
NCF2	FALSE
NCK1	FALSE
NCKAP1	FALSE
NDRG2	FALSE
NEBL	FALSE
NECAP2	FALSE
NEK1	FALSE
NEK6	FALSE
NEO1	FALSE
NEU4	FALSE
NF2	TRUE
NFASC	FALSE
NFAT5	FALSE
NFATC1	FALSE
NFATC2	FALSE
NFATC4	FALSE
NFE2	FALSE
NFIA	FALSE
NFIB	TRUE
NGEF	FALSE
NGFRAP1	FALSE
NHSL1	FALSE
NLRP2	FALSE
NMNAT2	FALSE
NOL4	FALSE
NR1I2	FALSE
NR4A1	FALSE
NR4A3	TRUE
NRF1	FALSE
NRG1	FALSE
NRG3	FALSE
NSD1	TRUE
NSDHL	FALSE
NSMAF	FALSE
NT5C3	FALSE
NT5DC2	FALSE
NTRK2	FALSE
NUP155	FALSE
NUSAP1	FALSE
OSBPL1A	FALSE
OSBPL6	FALSE
OSGIN1	FALSE
P4HA2	FALSE
PACRG	FALSE
PACSIN2	FALSE
PAIP2	FALSE
PAK4	FALSE
PALLD	FALSE
PANX2	FALSE
PARD3B	FALSE
PARVB	FALSE
PARVG	FALSE
PAX6	FALSE
PC	FALSE
PCYT1B	FALSE
PCYT2	FALSE
PDE11A	FALSE
PDE5A	FALSE
PDHA1	FALSE
PDIK1L	FALSE
PDLIM4	FALSE
PDZRN4	FALSE
PECI	FALSE
PFKL	FALSE
PGM3	FALSE
PHF1	FALSE
PHF16	FALSE
PHKA1	FALSE
PHLDB1	FALSE
PHTF2	FALSE
PHYH	FALSE
PI4KA	FALSE
PIGT	FALSE
PLA2G7	FALSE
PLBD2	FALSE
PLCD1	FALSE
PLCE1	FALSE
PLD5	FALSE
PLEKHG5	FALSE
PLEKHO2	FALSE
PLS1	FALSE
PLXNB1	FALSE
PMP22	FALSE
PNPLA6	FALSE
POC5	FALSE
POLE2	FALSE
POLL	FALSE
POMZP3	FALSE
POPDC3	FALSE
POU6F1	FALSE
PPARGC1B	FALSE
PPM1B	FALSE
PPP1R13L	FALSE
PPP2R2C	FALSE
PPP2R4	FALSE
PRCP	FALSE
PRDM1	TRUE
PRDM15	FALSE
PRDM8	FALSE
PRICKLE1	FALSE
PRKAG2	FALSE
PRR5L	FALSE
PRR7	FALSE
PSCA	FALSE
PSMG4	FALSE
PTGR1	FALSE
PTK2	FALSE
PTK2B	FALSE
PTPRA	FALSE
PTPRE	FALSE
PTPRN	FALSE
PTPRO	FALSE
PTPRS	FALSE
PXMP4	FALSE
PXN	FALSE
RAB11FIP3	FALSE
RAB23	FALSE
RAB27A	FALSE
RAB40C	FALSE
RAC1	FALSE
RACGAP1	FALSE
RAD51	FALSE
RAP1GAP	FALSE
RAPGEF1	FALSE
RARA	TRUE
RARG	FALSE
RASAL2	FALSE
RASGRF1	FALSE
RASSF8	FALSE
RBCK1	FALSE
RBFOX2	FALSE
RBM47	FALSE
REEP1	FALSE
RERE	FALSE
RFESD	FALSE
RG9MTD2	FALSE
RGMA	FALSE
RGS19	FALSE
RGS20	FALSE
RGS3	FALSE
RGS8	FALSE
RHOBTB1	FALSE
RHOC	FALSE
RIMS1	FALSE
RNF128	FALSE
RNF14	FALSE
RNF216L	FALSE
RNF24	FALSE
RNF8	FALSE
ROBO1	FALSE
RORA	FALSE
RPAP3	FALSE
RPL13	FALSE
RPL23AP82	FALSE
RPS6KA2	FALSE
RREB1	FALSE
RTCD1	FALSE
RTKN	FALSE
RTN4	FALSE
RUSC2	FALSE
SALL1	FALSE
SAMD4A	FALSE
SAMD9	FALSE
SARDH	FALSE
SATB2	FALSE
SBNO2	FALSE
SC5DL	FALSE
SCN8A	FALSE
SCNN1A	FALSE
SCRN1	FALSE
SEMA6D	FALSE
SEMA7A	FALSE
SENP7	FALSE
SEPHS1	FALSE
SEPT2	FALSE
SERINC2	FALSE
SERPINA10	FALSE
SET	TRUE
SETBP1	FALSE
SFMBT1	FALSE
SH2D2A	FALSE
SH2D3C	FALSE
SH2D4A	FALSE
SH3KBP1	FALSE
SHBG	FALSE
SHROOM1	FALSE
SIRT1	FALSE
SLC12A8	FALSE
SLC16A3	FALSE
SLC22A17	FALSE
SLC25A1	FALSE
SLC25A11	FALSE
SLC25A24	FALSE
SLC25A3	FALSE
SLC29A3	FALSE
SLC34A2	TRUE
SLC37A4	FALSE
SLC39A14	FALSE
SLC43A3	FALSE
SLC5A1	FALSE
SLC6A12	FALSE
SLC6A9	FALSE
SLC7A8	FALSE
SLCO5A1	FALSE
SMAD1	FALSE
SMAGP	FALSE
SMARCA4	TRUE
SMARCAL1	FALSE
SMARCD3	FALSE
SMTNL2	FALSE
SNAPC2	FALSE
SNX6	FALSE
SNX7	FALSE
SORBS1	FALSE
SP110	FALSE
SP8	FALSE
SPAST	FALSE
SPG11	FALSE
SPRED2	FALSE
ST3GAL5	FALSE
ST5	FALSE
ST6GAL1	FALSE
ST6GALNAC4	FALSE
ST7	FALSE
STARD8	FALSE
STOM	FALSE
SULF1	FALSE
SULT1A2	FALSE
SUMF2	FALSE
SUMO2	FALSE
SUN1	FALSE
SUOX	FALSE
SVIL	FALSE
TAGLN3	FALSE
TAOK1	FALSE
TBCK	FALSE
TCEA2	FALSE
TCF7L2	TRUE
TCP11L1	FALSE
TEAD4	FALSE
TENC1	FALSE
TES	FALSE
TEX264	FALSE
TFEB	TRUE
TGFBR3	FALSE
THAP1	FALSE
THAP3	FALSE
THEG	FALSE
TICAM2	FALSE
TJP1	FALSE
TMC5	FALSE
TMC6	FALSE
TMCC1	FALSE
TMEM126B	FALSE
TMEM169	FALSE
TMEM178	FALSE
TMEM184B	FALSE
TMEM206	FALSE
TMEM214	FALSE
TMEM25	FALSE
TMOD1	FALSE
TMPRSS3	FALSE
TNFRSF10B	FALSE
TNFRSF19	FALSE
TNFSF11	FALSE
TNRC6B	FALSE
TOM1L2	FALSE
TOPORS	FALSE
TPD52L1	FALSE
TPM3	TRUE
TPO	FALSE
TRAF3IP2	FALSE
TRIM3	FALSE
TRPC3	FALSE
TRPM6	FALSE
TSFM	FALSE
TSGA10	FALSE
TSTD1	FALSE
TTC39C	FALSE
TTLL6	FALSE
TTN	FALSE
TXNL4B	FALSE
TYSND1	FALSE
UBA3	FALSE
UBA5	FALSE
UBAP1	FALSE
UBE2C	FALSE
UBE2E3	FALSE
UBE2L3	FALSE
UBE2Q2	FALSE
UCKL1	FALSE
UQCC	FALSE
VAV3	FALSE
VCAN	FALSE
VDAC2	FALSE
WDR20	FALSE
WDR5	FALSE
WDR65	FALSE
WDR89	FALSE
WIPF1	FALSE
WIPI2	FALSE
WISP3	FALSE
WSB1	FALSE
XIST	FALSE
XLOC_001101	FALSE
XLOC_001289	FALSE
XLOC_003145	FALSE
XLOC_005720	FALSE
XLOC_006011	FALSE
XLOC_007128	FALSE
XLOC_007472	FALSE
XLOC_008663	FALSE
XLOC_012275	FALSE
XLOC_014244	FALSE
XLOC_015272	FALSE
XLOC_015475	FALSE
XLOC_015780	FALSE
XLOC_015873	FALSE
XLOC_016194	FALSE
XLOC_016772	FALSE
XLOC_018963	FALSE
XLOC_019968	FALSE
XLOC_020230	FALSE
XLOC_020629	FALSE
XLOC_020955	FALSE
XLOC_022721	FALSE
XLOC_029212	FALSE
XLOC_029285	FALSE
YAF2	FALSE
YAP1	FALSE
YIF1B	FALSE
YSK4	FALSE
YY1AP1	FALSE
ZBTB20	FALSE
ZDHHC9	FALSE
ZEB1	FALSE
ZFAT	FALSE
ZFP161	FALSE
ZFP64	FALSE
ZFX	FALSE
ZFY	FALSE
ZFYVE27	FALSE
ZFYVE28	FALSE
ZIC4	FALSE
ZNF177	FALSE
ZNF185	FALSE
ZNF193	FALSE
ZNF222	FALSE
ZNF260	FALSE
ZNF274	FALSE
ZNF30	FALSE
ZNF300	FALSE
ZNF32	FALSE
ZNF415	FALSE
ZNF451	FALSE
ZNF484	FALSE
ZNF502	FALSE
ZNF529	FALSE
ZNF565	FALSE
ZNF576	FALSE
ZNF585A	FALSE
ZNF610	FALSE
ZNF611	FALSE
ZNF615	FALSE
ZNF644	FALSE
ZNF668	FALSE
ZNF682	FALSE
ZNF701	FALSE
ZNF74	FALSE
ZNF772	FALSE
ZNF92	FALSE
ZP3	FALSE
ZPBP2	FALSE

## Sheet: Gm12878
Chr	Start	End	Strand	GeneID	GeneName	Histone	Comparison	SplicingOrTsss	PVal	Statistic
chr1	22351299	22351448	-	HSPC157	HSPC157	H3k4me1	1vs<1	SPLICING	0.000444379873954403	-10.2177396223278
chr1	110037142	110037245	+	CYB561D1	CYB561D1	H3k4me1	1vs<1	SPLICING	0.0139831261154845	-5.17924865449768
chr1	204946809	204946853	+	NFASC	NFASC	H3k4me1	1vs<1	SPLICING	0	-Inf
chr1	1355432	1355972	-	LOC441869	LOC441869	H3k4me2	0vs>0	SPLICING	2.24659118503998e-05	-15.6734746703834
chr1	100733056	100733094	+	RTCD1	RTCD1	H3k4me2	0vs>0	SPLICING	0.00187112171881753	-6.95590014579597
chr1	161008341	161008463	-	TSTD1	TSTD1	H3k4me2	0vs>0	SPLICING	0.0324795046601139	4.25620443582614
chr1	206810220	206810313	+	DYRK3	DYRK3	H3k4me2	0vs>0	SPLICING	0.0122996035043025	-5.2539712689304
chr1	242012414	242012518	+	EXO1	EXO1	H3k4me2	0vs>0	SPLICING	8.26235262748601e-05	10.9221458079907
chr1	1560371	1560565	+	MIB2	MIB2	H3k4me2	1vs<1	SPLICING	0	-Inf
chr1	1355432	1355972	-	LOC441869	LOC441869	H3k4me3	0vs>0	SPLICING	0.00496941477719779	-5.87309384170491
chr1	99128253	99128372	+	SNX7	SNX7	H3k4me3	0vs>0	SPLICING	0.00747997330774051	5.28283437879431
chr1	161008341	161008463	-	TSTD1	TSTD1	H3k4me3	0vs>0	SPLICING	0.0213309216371631	4.28300989462375
chr1	228295678	228295785	-	MRPL55	MRPL55	H3k4me3	0vs>0	SPLICING	0.00570650542553016	-5.2589178137488
chr1	242012414	242012518	+	EXO1	EXO1	H3k4me3	0vs>0	SPLICING	0.00203217614468327	6.45023666147317
chr1	110037142	110037245	+	CYB561D1	CYB561D1	H3k4me3	1vs<1	SPLICING	0.00353796043427175	-6.34565156649272
chr1	9943763	9943796	-	CTNNBIP1	CTNNBIP1	H3k9ac	0vs>0	SPLICING	0	-Inf
chr1	228295678	228295785	-	MRPL55	MRPL55	H3k9ac	0vs>0	SPLICING	0	-Inf
chr1	16782313	16782388	+	NECAP2	NECAP2	H3k9ac	1vs<1	SPLICING	0	-Inf
chr1	110037142	110037245	+	CYB561D1	CYB561D1	H3k9ac	1vs<1	SPLICING	0.0120509605861775	-4.90067189774149
chr1	110037765	110037802	+	CYB561D1	CYB561D1	H3k9ac	1vs<1	SPLICING	0	-Inf
chr1	156203419	156203519	+	BGLAP	BGLAP	H3k9ac	1vs<1	SPLICING	0.0360846227859158	-3.97957026171027
chr1	43642792	43642882	+	WDR65	WDR65	H3k9me3	0vs1	SPLICING	0	-Inf
chr1	156202111	156202216	+	BGLAP	BGLAP	H3k9me3	1vs<1	SPLICING	0	-Inf
chr1	43642792	43642882	+	WDR65	WDR65	H4k20me1	0vs1	SPLICING	8.87271767208356e-05	-8.78210973506676
chr1	42789355	42789498	-	FOXJ3	FOXJ3	H4k20me1	0vs>0	SPLICING	0.0420672381909605	-3.99700150024125
chr1	100733056	100733094	+	RTCD1	RTCD1	H4k20me1	0vs>0	SPLICING	0	-Inf
chr1	228295678	228295785	-	MRPL55	MRPL55	H4k20me1	0vs>0	SPLICING	0	-Inf
chr1	17312958	17313127	-	ATP13A2	ATP13A2	H4k20me1	1vs<1	SPLICING	0	-Inf
chr1	155650207	155650247	-	YY1AP1	YY1AP1	H4k20me1	1vs<1	SPLICING	0.00695554539779768	-5.52696547932342
chr1	221912276	221913129	-	DUSP10	DUSP10	H4k20me1	1vs<1	SPLICING	0.04568211520985	-4.13427188643761
chr1	68947729	68948580	-	DEPDC1	DEPDC1	H3k27ac	0vs>0	SPLICING	0	-Inf
chr1	150978577	150978723	-	FAM63A	FAM63A	H3k27ac	0vs>0	SPLICING	0.0109443106788725	-4.91325519040482
chr1	22351299	22351448	-	HSPC157	HSPC157	H3k27ac	1vs<1	SPLICING	0.000449322904093265	9.85341887723758
chr1	110037142	110037245	+	CYB561D1	CYB561D1	H3k27ac	1vs<1	SPLICING	0	-Inf
chr1	182638759	182638887	-	RGS8	RGS8	H3k27me3	0vs1	SPLICING	0	-Inf
chr1	17939553	17939669	+	ARHGEF10L	ARHGEF10L	H3k27me3	0vs>0	SPLICING	0.000246568427431666	-8.85666158998186
chr1	87598347	87598546	+	LOC339524	LOC339524	H3k27me3	0vs>0	SPLICING	0.00267136607534241	-6.21454904809402
chr1	99128253	99128372	+	SNX7	SNX7	H3k27me3	0vs>0	SPLICING	0	-Inf
chr1	6522923	6523030	-	PLEKHG5	PLEKHG5	H3k27me3	1vs<1	SPLICING	0	-Inf
chr1	155648949	155649104	-	YY1AP1	YY1AP1	H3k36me3	0vs>0	SPLICING	0.0359934711848036	-4.33331609189757
chr1	156195348	156195459	+	BGLAP	BGLAP	H3k36me3	0vs>0	SPLICING	0	-Inf
chr1	1560371	1560565	+	MIB2	MIB2	H3k36me3	1vs<1	SPLICING	0	-Inf
chr1	16782313	16782388	+	NECAP2	NECAP2	H3k36me3	1vs<1	SPLICING	0.00356442329369792	-6.87689228527865
chr1	156203419	156203519	+	BGLAP	BGLAP	H3k36me3	1vs<1	SPLICING	2.65637358699416e-05	-14.2831773439354
chr1	221912276	221913129	-	DUSP10	DUSP10	H3k36me3	1vs<1	SPLICING	0.0191647797142025	-5.39367170732959
chr1	1690540	1690682	-	NADK	NADK	H3k79me2	0vs>0	SPLICING	0.0203410798094543	4.4461280411098
chr1	42781017	42781126	-	FOXJ3	FOXJ3	H3k79me2	0vs>0	SPLICING	0.0477235982203988	-3.77147671245798
chr1	42789355	42789498	-	FOXJ3	FOXJ3	H3k79me2	0vs>0	SPLICING	0.010434775258468	-5.07923231219638
chr1	100733056	100733094	+	RTCD1	RTCD1	H3k79me2	0vs>0	SPLICING	0.00118403529556861	-7.47347150490849
chr1	1560371	1560565	+	MIB2	MIB2	H3k79me2	1vs<1	SPLICING	0	-Inf
chr1	110037142	110037245	+	CYB561D1	CYB561D1	H3k79me2	1vs<1	SPLICING	0	-Inf
chr1	110037765	110037802	+	CYB561D1	CYB561D1	H3k79me2	1vs<1	SPLICING	0.0202760100844067	-4.47283356524284
chr1	155650207	155650247	-	YY1AP1	YY1AP1	H3k79me2	1vs<1	SPLICING	0.0202760100844067	-4.4674428053076
chr1	221912276	221913129	-	DUSP10	DUSP10	H3k79me2	1vs<1	SPLICING	0.0109339345708281	-5.60488038299354
chr1	43642792	43642882	+	WDR65	WDR65	H2az	0vs1	SPLICING	0	-Inf
chr1	176197321	176197385	+	XLOC_001101	XLOC_001101	H2az	0vs1	SPLICING	0	-Inf
chr1	1355432	1355972	-	LOC441869	LOC441869	H2az	0vs>0	SPLICING	0.0210452196219818	-4.4812007586787
chr1	1560371	1560565	+	MIB2	MIB2	H2az	1vs<1	SPLICING	0	-Inf
chr1	68151708	68151809	+	GADD45A	GADD45A	H2az	1vs<1	SPLICING	0.00323288008730122	-5.94313121507714
chr1	110037142	110037245	+	CYB561D1	CYB561D1	H2az	1vs<1	SPLICING	0.0032036058182421	-5.99489393126604
chr1	183559975	183560056	-	NCF2	NCF2	H3k4me1	1vs<1	TSSS	0	-Inf
chr1	1550795	1551013	+	MIB2	MIB2	H3k4me2	1vs<1	TSSS	0.00709754334302026	-6.13534377759937
chr1	34632624	34632772	+	C1orf94	C1orf94	H3k4me2	1vs<1	TSSS	0	-Inf
chr1	45805571	45805629	-	MUTYH	MUTYH	H3k4me2	1vs<1	TSSS	0.0129007366805194	-5.23709036369304
chr1	86043667	86044046	-	DDAH1	DDAH1	H3k4me2	1vs<1	TSSS	0.0110156434876855	5.92874448528776
chr1	113249700	113250025	-	RHOC	RHOC	H3k4me2	1vs<1	TSSS	0.0207615238317321	-4.73696907261427
chr1	156675501	156675608	-	CRABP2	CRABP2	H3k4me2	1vs<1	TSSS	0.00841754384053	5.84564418642568
chr1	182360814	182361341	-	GLUL	GLUL	H3k4me2	1vs<1	TSSS	0.0349171386196433	4.17416812544989
chr1	183559975	183560056	-	NCF2	NCF2	H3k4me2	1vs<1	TSSS	0.000796720122450577	-10.4787188445999
chr1	204797782	204797910	+	NFASC	NFASC	H3k4me2	1vs<1	TSSS	0.00665831030204495	-6.83806632130749
chr1	235491869	235492093	+	GGPS1	GGPS1	H3k4me2	1vs<1	TSSS	0.0162043022013957	-4.99459646207798
chr1	1447910	1448070	+	ATAD3A	ATAD3A	H3k4me3	1vs<1	TSSS	0.0106409776469369	-4.94317403100097
chr1	1550795	1551013	+	MIB2	MIB2	H3k4me3	1vs<1	TSSS	5.60281794307734e-05	-13.1825201405633
chr1	21671869	21672034	-	ECE1	ECE1	H3k4me3	1vs<1	TSSS	0.00408367666703574	-5.9892226391208
chr1	26146397	26146520	+	FAM54B	FAM54B	H3k4me3	1vs<1	TSSS	0.00406961619571934	-6.00280689517243
chr1	26438268	26438406	+	PDIK1L	PDIK1L	H3k4me3	1vs<1	TSSS	0.0117080544831918	-4.84704070148043
chr1	34632624	34632772	+	C1orf94	C1orf94	H3k4me3	1vs<1	TSSS	0	-Inf
chr1	45805571	45805629	-	MUTYH	MUTYH	H3k4me3	1vs<1	TSSS	0.000392533782466192	-9.53123330143993
chr1	86043667	86044046	-	DDAH1	DDAH1	H3k4me3	1vs<1	TSSS	0.000199399955399536	12.2942208552645
chr1	91966404	91966505	+	CDC7	CDC7	H3k4me3	1vs<1	TSSS	0.0175852670304408	-4.42472818610423
chr1	92951571	92951628	-	GFI1	GFI1	H3k4me3	1vs<1	TSSS	0.0223446617277008	4.17451404961749
chr1	108742578	108742974	-	SLC25A24	SLC25A24	H3k4me3	1vs<1	TSSS	0.00146153256058549	-7.39887207703802
chr1	113249700	113250025	-	RHOC	RHOC	H3k4me3	1vs<1	TSSS	0.000143339031557783	-11.5124863360908
chr1	223900119	223900579	+	CAPN2	CAPN2	H3k4me3	1vs<1	TSSS	0.000504879379963847	-9.12314532023371
chr1	242687899	242687998	-	PLD5	PLD5	H3k4me3	1vs<1	TSSS	0	-Inf
chr1	1447910	1448070	+	ATAD3A	ATAD3A	H3k9ac	1vs<1	TSSS	0.0091456819383411	-5.08118705052144
chr1	1550795	1551013	+	MIB2	MIB2	H3k9ac	1vs<1	TSSS	0.000189242297328449	-10.6118521850205
chr1	21671869	21672034	-	ECE1	ECE1	H3k9ac	1vs<1	TSSS	0.00529395070959069	-5.63840295304575
chr1	26146397	26146520	+	FAM54B	FAM54B	H3k9ac	1vs<1	TSSS	9.09569011743528e-05	-12.0527709687739
chr1	26438268	26438406	+	PDIK1L	PDIK1L	H3k9ac	1vs<1	TSSS	0.0123274747698162	-4.75855626718573
chr1	34632624	34632772	+	C1orf94	C1orf94	H3k9ac	1vs<1	TSSS	0	-Inf
chr1	45805571	45805629	-	MUTYH	MUTYH	H3k9ac	1vs<1	TSSS	3.96292348371644e-05	-13.8678739393424
chr1	86043667	86044046	-	DDAH1	DDAH1	H3k9ac	1vs<1	TSSS	0.00392131748657689	6.47529716017229
chr1	91487547	91487671	-	ZNF644	ZNF644	H3k9ac	1vs<1	TSSS	0.0289811581121778	5.55672546003568
chr1	91966404	91966505	+	CDC7	CDC7	H3k9ac	1vs<1	TSSS	0.000178652610269595	-10.7952911764282
chr1	100315640	100315971	+	AGL	AGL	H3k9ac	1vs<1	TSSS	0.0185002800460305	-4.37478873439483
chr1	108742578	108742974	-	SLC25A24	SLC25A24	H3k9ac	1vs<1	TSSS	0.000407578888257498	-9.2330766512719
chr1	113249700	113250025	-	RHOC	RHOC	H3k9ac	1vs<1	TSSS	0.000523915277752201	-8.74674817382087
chr1	201708963	201709204	+	NAV1	NAV1	H3k9ac	1vs<1	TSSS	0.0365787487173565	3.75515611675058
chr1	223900119	223900579	+	CAPN2	CAPN2	H3k9ac	1vs<1	TSSS	0.000552624196134433	-8.63048789888193
chr1	21995747	21995856	-	RAP1GAP	RAP1GAP	H3k9me3	1vs<1	TSSS	0	-Inf
chr1	108742578	108742974	-	SLC25A24	SLC25A24	H3k9me3	1vs<1	TSSS	0	-Inf
chr1	154841508	154842754	-	KCNN3	KCNN3	H3k9me3	1vs<1	TSSS	0	-Inf
chr1	223900119	223900579	+	CAPN2	CAPN2	H3k9me3	1vs<1	TSSS	0	-Inf
chr1	1550795	1551013	+	MIB2	MIB2	H4k20me1	1vs<1	TSSS	0	-Inf
chr1	1447910	1448070	+	ATAD3A	ATAD3A	H3k27ac	1vs<1	TSSS	0.00722152508193936	-5.18897634260504
chr1	1550795	1551013	+	MIB2	MIB2	H3k27ac	1vs<1	TSSS	5.79254749889536e-05	-12.6449563914663
chr1	21671869	21672034	-	ECE1	ECE1	H3k27ac	1vs<1	TSSS	0.00106716602819991	-7.41210682020641
chr1	26146397	26146520	+	FAM54B	FAM54B	H3k27ac	1vs<1	TSSS	1.04494999663675e-05	-16.0715912721665
chr1	26438268	26438406	+	PDIK1L	PDIK1L	H3k27ac	1vs<1	TSSS	0.00948655916535679	-4.91556192030797
chr1	34632624	34632772	+	C1orf94	C1orf94	H3k27ac	1vs<1	TSSS	0	-Inf
chr1	45805571	45805629	-	MUTYH	MUTYH	H3k27ac	1vs<1	TSSS	0.000497771345022543	-8.46562647737637
chr1	91966404	91966505	+	CDC7	CDC7	H3k27ac	1vs<1	TSSS	7.52516372823157e-05	-12.0866539471861
chr1	108742578	108742974	-	SLC25A24	SLC25A24	H3k27ac	1vs<1	TSSS	0.000102678636135367	-11.1858641883592
chr1	113249700	113250025	-	RHOC	RHOC	H3k27ac	1vs<1	TSSS	0.000102678636135367	-11.2470364610761
chr1	156786467	156786640	-	SH2D2A	SH2D2A	H3k27ac	1vs<1	TSSS	0.000184032944196662	13.8119417764796
chr1	223900119	223900579	+	CAPN2	CAPN2	H3k27ac	1vs<1	TSSS	0.00195397546590435	-6.65367268425122
chr1	17308009	17308081	-	MFAP2	MFAP2	H3k27me3	1vs<1	TSSS	0	-Inf
chr1	183387318	183387737	-	NMNAT2	NMNAT2	H3k27me3	1vs<1	TSSS	0.00138388997459847	7.78043116414684
chr1	113249700	113250025	-	RHOC	RHOC	H3k79me2	1vs<1	TSSS	0.000476455240229841	-9.17910461188971
chr1	156675501	156675608	-	CRABP2	CRABP2	H3k79me2	1vs<1	TSSS	0	-Inf
chr1	173793276	173793777	-	CENPL	CENPL	H3k79me2	1vs<1	TSSS	0.000746976074839935	9.26062688126816
chr1	1550795	1551013	+	MIB2	MIB2	H2az	1vs<1	TSSS	0.00285738243654926	-7.32132733731143
chr1	6684925	6685014	+	THAP3	THAP3	H2az	1vs<1	TSSS	0.0109298084483751	-5.47356864160075
chr1	26146397	26146520	+	FAM54B	FAM54B	H2az	1vs<1	TSSS	0.0411363263217856	-3.85928023469602
chr1	33207512	33207790	+	KIAA1522	KIAA1522	H2az	1vs<1	TSSS	0.0434724741489704	3.77066514983115
chr1	44496978	44497134	-	SLC6A9	SLC6A9	H2az	1vs<1	TSSS	0.0261325966521186	4.43352000796544
chr1	45805571	45805629	-	MUTYH	MUTYH	H2az	1vs<1	TSSS	0.0343654956540003	-4.0733390292616
chr1	108742578	108742974	-	SLC25A24	SLC25A24	H2az	1vs<1	TSSS	0.0415318652563179	-3.84096172865342
chr1	113249700	113250025	-	RHOC	RHOC	H2az	1vs<1	TSSS	0.020102624536239	-4.60774066484699
chr1	183559975	183560056	-	NCF2	NCF2	H2az	1vs<1	TSSS	0.0206214346078448	-4.86971583121449
chr1	204797782	204797910	+	NFASC	NFASC	H2az	1vs<1	TSSS	0.00310400556807462	-7.85930217501822
chr1	215178885	215179298	+	KCNK2	KCNK2	H2az	1vs<1	TSSS	0.0398369007338989	4.86245131012961
chr1	223900119	223900579	+	CAPN2	CAPN2	H2az	1vs<1	TSSS	0.0122100676772507	-5.29575484042962
chr10	69648640	69648881	+	SIRT1	SIRT1	H3k4me1	1vs<1	SPLICING	0	-Inf
chr10	71692316	71692360	+	COL13A1	COL13A1	H3k4me2	0vs>0	SPLICING	0	-Inf
chr10	76971240	76971417	+	VDAC2	VDAC2	H3k4me2	0vs>0	SPLICING	0.0409373107856922	-3.90231930066253
chr10	13340187	13340245	-	PHYH	PHYH	H3k4me2	1vs<1	SPLICING	0	-Inf
chr10	69648640	69648881	+	SIRT1	SIRT1	H3k4me2	1vs<1	SPLICING	3.40893921634629e-05	-12.7812889824883
chr10	99508026	99508121	+	ZFYVE27	ZFYVE27	H3k4me2	1vs<1	SPLICING	0	-Inf
chr10	71658453	71658518	+	COL13A1	COL13A1	H3k4me3	0vs>0	SPLICING	0	-Inf
chr10	103347003	103347163	-	POLL	POLL	H3k4me3	1vs<1	SPLICING	0.00561552153377298	-5.86304904691342
chr10	103346879	103346957	-	POLL	POLL	H3k9ac	0vs>0	SPLICING	0.008371792456661	-5.12044533884916
chr10	62547818	62547988	+	CDK1	CDK1	H3k9ac	1vs<1	SPLICING	0.00079747732143497	-7.81382631610915
chr10	71902424	71902609	-	TYSND1	TYSND1	H3k9ac	1vs<1	SPLICING	0	-Inf
chr10	103347003	103347163	-	POLL	POLL	H3k9ac	1vs<1	SPLICING	0.0132473735977608	-4.79950948981587
chr10	119305143	119305327	+	EMX2	EMX2	H3k9ac	1vs<1	SPLICING	0	-Inf
chr10	90767457	90767594	+	FAS	FAS	H3k9me1	1vs<1	SPLICING	0	-Inf
chr10	71902424	71902609	-	TYSND1	TYSND1	H3k9me3	1vs<1	SPLICING	0	-Inf
chr10	71658453	71658518	+	COL13A1	COL13A1	H4k20me1	0vs>0	SPLICING	0	-Inf
chr10	71692316	71692360	+	COL13A1	COL13A1	H4k20me1	0vs>0	SPLICING	0	-Inf
chr10	71902424	71902609	-	TYSND1	TYSND1	H4k20me1	1vs<1	SPLICING	0.0126943585233776	-4.96401392969346
chr10	73111319	73111545	+	SLC29A3	SLC29A3	H4k20me1	1vs<1	SPLICING	0	-Inf
chr10	75599297	75599359	-	CAMK2G	CAMK2G	H3k27ac	0vs>0	SPLICING	0	-Inf
chr10	103346879	103346957	-	POLL	POLL	H3k27ac	0vs>0	SPLICING	0	-Inf
chr10	62547818	62547988	+	CDK1	CDK1	H3k27ac	1vs<1	SPLICING	0	-Inf
chr10	103347003	103347163	-	POLL	POLL	H3k27ac	1vs<1	SPLICING	0.0033189667082105	-6.38335660864409
chr10	129913192	129914271	-	MKI67	MKI67	H3k27ac	1vs<1	SPLICING	0	-Inf
chr10	24831812	24833410	+	KIAA1217	KIAA1217	H3k27me3	0vs>0	SPLICING	0	-Inf
chr10	71692316	71692360	+	COL13A1	COL13A1	H3k27me3	0vs>0	SPLICING	0	-Inf
chr10	71700744	71700779	+	COL13A1	COL13A1	H3k27me3	0vs>0	SPLICING	0	-Inf
chr10	13340187	13340245	-	PHYH	PHYH	H3k27me3	1vs<1	SPLICING	0	-Inf
chr10	73111319	73111545	+	SLC29A3	SLC29A3	H3k27me3	1vs<1	SPLICING	0	-Inf
chr10	114849159	114849299	+	TCF7L2	TCF7L2	H3k36me3	0vs>0	SPLICING	0	-Inf
chr10	35467817	35467914	+	CREM	CREM	H3k36me3	1vs<1	SPLICING	0	-Inf
chr10	71902424	71902609	-	TYSND1	TYSND1	H3k36me3	1vs<1	SPLICING	0.0228601887101812	-4.74564542330257
chr10	71903598	71903728	-	TYSND1	TYSND1	H3k36me3	1vs<1	SPLICING	0	-Inf
chr10	99508026	99508121	+	ZFYVE27	ZFYVE27	H3k36me3	1vs<1	SPLICING	0.0329915296921285	-4.43415923897138
chr10	27060004	27060018	-	ABI1	ABI1	H3k79me2	0vs>0	SPLICING	0	-Inf
chr10	114849159	114849299	+	TCF7L2	TCF7L2	H3k79me2	0vs>0	SPLICING	0	-Inf
chr10	13340187	13340245	-	PHYH	PHYH	H3k79me2	1vs<1	SPLICING	0	-Inf
chr10	35437296	35437419	+	CREM	CREM	H3k79me2	1vs<1	SPLICING	0	-Inf
chr10	62547818	62547988	+	CDK1	CDK1	H3k79me2	1vs<1	SPLICING	0.042042824149549	-3.85335024173515
chr10	71903598	71903728	-	TYSND1	TYSND1	H3k79me2	1vs<1	SPLICING	0.0109339345708281	-5.18840472005219
chr10	99508026	99508121	+	ZFYVE27	ZFYVE27	H3k79me2	1vs<1	SPLICING	0.000937398846289623	-7.76438488029658
chr10	103347003	103347163	-	POLL	POLL	H3k79me2	1vs<1	SPLICING	0.017157779434574	-4.71023919555824
chr10	129913192	129914271	-	MKI67	MKI67	H3k79me2	1vs<1	SPLICING	0.0202760100844067	-4.52821316895697
chr10	13542510	13542679	-	BEND7	BEND7	H2az	0vs>0	SPLICING	0	-Inf
chr10	24831812	24833410	+	KIAA1217	KIAA1217	H2az	0vs>0	SPLICING	0	-Inf
chr10	76865419	76865626	-	DUSP13	DUSP13	H2az	0vs>0	SPLICING	0	-Inf
chr10	99393762	99393913	-	MORN4	MORN4	H3k4me1	1vs<1	TSSS	0.00122727972805257	-7.80619192361835
chr10	7708766	7708961	-	ITIH5	ITIH5	H3k4me2	1vs<1	TSSS	0.0213285785561384	-4.70631679963968
chr10	44144250	44144326	-	ZNF32	ZNF32	H3k4me2	1vs<1	TSSS	0.0129007366805194	-5.24386205692696
chr10	90750696	90751147	-	ACTA2	ACTA2	H3k4me2	1vs<1	TSSS	0.0142443591709813	-5.14398283448907
chr10	7708766	7708961	-	ITIH5	ITIH5	H3k4me3	1vs<1	TSSS	0.000685143835186003	-8.52930103475512
chr10	13341968	13342130	-	PHYH	PHYH	H3k4me3	1vs<1	TSSS	0.000938348989899265	-8.07003794459471
chr10	21462694	21463116	-	NEBL	NEBL	H3k4me3	1vs<1	TSSS	0.00984844868938025	5.94300651451746
chr10	27530988	27531068	-	ACBD5	ACBD5	H3k4me3	1vs<1	TSSS	0.0016246177427047	-7.21794320231016
chr10	44144250	44144326	-	ZNF32	ZNF32	H3k4me3	1vs<1	TSSS	0.00208494651593192	-6.85555052376817
chr10	62761157	62761198	-	RHOBTB1	RHOBTB1	H3k4me3	1vs<1	TSSS	0	-Inf
chr10	69644427	69644909	+	SIRT1	SIRT1	H3k4me3	1vs<1	TSSS	0.000189809564356249	-10.8794930686375
chr10	105845481	105845638	-	COL17A1	COL17A1	H3k4me3	1vs<1	TSSS	0.00513177182105233	-6.19010426571809
chr10	126848888	126849103	-	CTBP2	CTBP2	H3k4me3	1vs<1	TSSS	0.0164808734016087	4.49534925974306
chr10	7708766	7708961	-	ITIH5	ITIH5	H3k9ac	1vs<1	TSSS	0	-Inf
chr10	13341968	13342130	-	PHYH	PHYH	H3k9ac	1vs<1	TSSS	0.000879964194531131	-7.9164122482318
chr10	27530988	27531068	-	ACBD5	ACBD5	H3k9ac	1vs<1	TSSS	0.000303139167128037	-9.67995130109511
chr10	30024680	30024730	-	SVIL	SVIL	H3k9ac	1vs<1	TSSS	0.0174965840370638	-4.43414689290438
chr10	44144250	44144326	-	ZNF32	ZNF32	H3k9ac	1vs<1	TSSS	0.007024271554515	-5.36295516838172
chr10	69644427	69644909	+	SIRT1	SIRT1	H3k9ac	1vs<1	TSSS	0.000583862229681462	-8.54044955584482
chr10	81664654	81664805	+	LOC100288974	LOC100288974	H3k9ac	1vs<1	TSSS	0.03953752393915	3.8674382774514
chr10	88728188	88728362	+	AGAP11	AGAP11	H3k9ac	1vs<1	TSSS	0.00763171147788935	-5.26883162342235
chr10	103603253	103603677	-	KCNIP2	KCNIP2	H3k9ac	1vs<1	TSSS	0.0141519193978573	-4.63868895195188
chr10	104613967	104614184	+	AS3MT	AS3MT	H3k9ac	1vs<1	TSSS	0.0286920683023443	3.99970167391603
chr10	105845481	105845638	-	COL17A1	COL17A1	H3k9ac	1vs<1	TSSS	0.00255708232856866	-7.10623523901225
chr10	112678879	112679124	-	BBIP1	BBIP1	H3k9ac	1vs<1	TSSS	0.0252506064375009	4.12057461279768
chr10	126848888	126849103	-	CTBP2	CTBP2	H3k9ac	1vs<1	TSSS	0.0208201137466087	4.27572811522722
chr10	69644427	69644909	+	SIRT1	SIRT1	H4k20me1	1vs<1	TSSS	0	-Inf
chr10	13341968	13342130	-	PHYH	PHYH	H3k27ac	1vs<1	TSSS	0.000721463074459209	-7.92575998486409
chr10	27530988	27531068	-	ACBD5	ACBD5	H3k27ac	1vs<1	TSSS	0.000596055574974214	-8.19661403424226
chr10	30024680	30024730	-	SVIL	SVIL	H3k27ac	1vs<1	TSSS	0.00893120647958883	-4.98031466587596
chr10	31608101	31608221	+	ZEB1	ZEB1	H3k27ac	1vs<1	TSSS	0.0241993769952679	-4.62340128120709
chr10	44144250	44144326	-	ZNF32	ZNF32	H3k27ac	1vs<1	TSSS	0.0011975515455998	-7.19378697160348
chr10	69644427	69644909	+	SIRT1	SIRT1	H3k27ac	1vs<1	TSSS	0.000171311386440156	-10.2932909073984
chr10	88728188	88728362	+	AGAP11	AGAP11	H3k27ac	1vs<1	TSSS	0.0129552724553622	-4.61073807798771
chr10	105845481	105845638	-	COL17A1	COL17A1	H3k27ac	1vs<1	TSSS	0.00199802799253803	-7.27736345031919
chr10	62149183	62149488	-	ANK3	ANK3	H3k27me3	1vs<1	TSSS	0	-Inf
chr10	105845481	105845638	-	COL17A1	COL17A1	H3k79me2	1vs<1	TSSS	0.014039369759912	-5.53870412197407
chr10	21462694	21463116	-	NEBL	NEBL	H2az	1vs<1	TSSS	0.016653906771559	5.65941194746733
chr10	30024680	30024730	-	SVIL	SVIL	H2az	1vs<1	TSSS	0.0424540104694188	-3.81414816340936
chr10	69644427	69644909	+	SIRT1	SIRT1	H2az	1vs<1	TSSS	0.00578926268577903	-6.24458683215332
chr10	71078603	71078766	+	HK1	HK1	H2az	1vs<1	TSSS	0.0152140214468873	5.3164296790151
chr10	81664654	81664805	+	LOC100288974	LOC100288974	H2az	1vs<1	TSSS	0.0108521461347814	5.94506895241277
chr10	129705325	129705573	+	PTPRE	PTPRE	H2az	1vs<1	TSSS	0.0366287670031976	-4.18327080474782
chr11	60152561	60152695	+	MS4A7	MS4A7	H3k4me1	0vs>0	SPLICING	0	-Inf
chr11	85340176	85340306	+	TMEM126B	TMEM126B	H3k4me1	0vs>0	SPLICING	0	-Inf
chr11	104763624	104763718	-	CASP12	CASP12	H3k4me1	0vs>0	SPLICING	0	-Inf
chr11	129992200	129992408	+	APLP2	APLP2	H3k4me1	1vs<1	SPLICING	0.00062204364323023	-9.5301549664997
chr11	6494314	6494478	-	TRIM3	TRIM3	H3k4me2	0vs>0	SPLICING	0.00738771677316253	-5.41306873697529
chr11	44165797	44165889	+	EXT2	EXT2	H3k4me2	0vs>0	SPLICING	0	-Inf
chr11	104763624	104763718	-	CASP12	CASP12	H3k4me2	0vs>0	SPLICING	0	-Inf
chr11	6494314	6494478	-	TRIM3	TRIM3	H3k4me3	0vs>0	SPLICING	0.0370817100855058	-3.65134394731368
chr11	36398179	36398254	+	PRR5L	PRR5L	H3k4me3	0vs>0	SPLICING	0.0208109807919996	-4.65968413913104
chr11	46387794	46388534	+	DGKZ	DGKZ	H3k4me3	0vs>0	SPLICING	0	-Inf
chr11	61719243	61719430	+	BEST1	BEST1	H3k4me3	0vs>0	SPLICING	0	-Inf
chr11	110237086	110237259	+	XLOC_004814	XLOC_004814	H3k4me3	1vs<1	SPLICING	0	-Inf
chr11	6494314	6494478	-	TRIM3	TRIM3	H3k9ac	0vs>0	SPLICING	0.000333167135390644	-8.62748012172891
chr11	71502785	71502865	+	FAM86C	FAM86C	H3k9ac	0vs>0	SPLICING	0	-Inf
chr11	85340176	85340306	+	TMEM126B	TMEM126B	H3k9ac	0vs>0	SPLICING	0.0116384870127936	4.83128277366626
chr11	104763624	104763718	-	CASP12	CASP12	H3k9ac	0vs>0	SPLICING	0	-Inf
chr11	64891974	64892124	+	MRPL49	MRPL49	H3k9ac	1vs<1	SPLICING	0.0146053647959699	-4.69808726436078
chr11	71712247	71712370	+	IL18BP	IL18BP	H3k9me1	1vs<1	SPLICING	0	-Inf
chr11	6494314	6494478	-	TRIM3	TRIM3	H3k9me3	0vs>0	SPLICING	0	-Inf
chr11	46387794	46388534	+	DGKZ	DGKZ	H3k9me3	0vs>0	SPLICING	0	-Inf
chr11	6494314	6494478	-	TRIM3	TRIM3	H4k20me1	0vs>0	SPLICING	0	-Inf
chr11	44165797	44165889	+	EXT2	EXT2	H4k20me1	0vs>0	SPLICING	0	-Inf
chr11	61719243	61719430	+	BEST1	BEST1	H4k20me1	0vs>0	SPLICING	0	-Inf
chr11	44165797	44165889	+	EXT2	EXT2	H3k27ac	0vs>0	SPLICING	0	-Inf
chr11	61719243	61719430	+	BEST1	BEST1	H3k27ac	0vs>0	SPLICING	0.005499408858422	-6.75417591831562
chr11	104763624	104763718	-	CASP12	CASP12	H3k27ac	0vs>0	SPLICING	0	-Inf
chr11	110237086	110237259	+	XLOC_004814	XLOC_004814	H3k27ac	1vs<1	SPLICING	0.0249922323777646	-7.1353093877568
chr11	70267576	70267686	+	CTTN	CTTN	H3k27me3	0vs>0	SPLICING	0	-Inf
chr11	118402865	118403176	+	TMEM25	TMEM25	H3k27me3	1vs<1	SPLICING	0	-Inf
chr11	43339971	43340032	+	API5	API5	H3k36me3	0vs>0	SPLICING	0.0183479970819256	-4.97030399845012
chr11	60152561	60152695	+	MS4A7	MS4A7	H3k36me3	0vs>0	SPLICING	0	-Inf
chr11	82595865	82595927	-	PRCP	PRCP	H3k36me3	0vs>0	SPLICING	0	-Inf
chr11	46776438	46776617	-	CKAP5	CKAP5	H3k36me3	1vs<1	SPLICING	0.0222330714217274	4.80054196506517
chr11	43339971	43340032	+	API5	API5	H3k79me2	0vs>0	SPLICING	0.010434775258468	-5.09863952783044
chr11	35201821	35201954	+	CD44	CD44	H3k79me2	1vs<1	SPLICING	0.0202760100844067	4.4729013433166
chr11	35211382	35211612	+	CD44	CD44	H3k79me2	1vs<1	SPLICING	0.049233525265247	3.71806680870324
chr11	35223218	35223334	+	CD44	CD44	H3k79me2	1vs<1	SPLICING	0.0269467851751391	4.19908545670988
chr11	35232793	35232996	+	CD44	CD44	H3k79me2	1vs<1	SPLICING	0.036586918784423	3.96480069450233
chr11	110252650	110252745	+	XLOC_004814	XLOC_004814	H3k79me2	1vs<1	SPLICING	0	-Inf
chr11	6494314	6494478	-	TRIM3	TRIM3	H2az	0vs>0	SPLICING	0.00464034833442081	-5.52538610979942
chr11	58877013	58877179	+	FAM111B	FAM111B	H2az	0vs>0	SPLICING	0	-Inf
chr11	104763624	104763718	-	CASP12	CASP12	H2az	0vs>0	SPLICING	0	-Inf
chr11	1874200	1874427	+	LSP1	LSP1	H3k4me1	1vs<1	TSSS	0	-Inf
chr11	31839357	31839509	-	PAX6	PAX6	H3k4me1	1vs<1	TSSS	0.00977035784910747	-5.39547607316488
chr11	33061561	33061752	+	TCP11L1	TCP11L1	H3k4me1	1vs<1	TSSS	0.0192114613690856	-4.78272127349611
chr11	44117099	44117402	+	EXT2	EXT2	H3k4me1	1vs<1	TSSS	0	-Inf
chr11	1874200	1874427	+	LSP1	LSP1	H3k4me2	1vs<1	TSSS	0	-Inf
chr11	44117099	44117402	+	EXT2	EXT2	H3k4me2	1vs<1	TSSS	0.0155177288846554	-5.05164116715745
chr11	125495036	125495907	+	CHEK1	CHEK1	H3k4me2	1vs<1	TSSS	0.0340675694157928	-4.23175576385672
chr11	125756955	125757660	+	HYLS1	HYLS1	H3k4me2	1vs<1	TSSS	0.0025547603980257	7.50920794187303
chr11	133402159	133402403	-	OPCML	OPCML	H3k4me2	1vs<1	TSSS	0	-Inf
chr11	1874200	1874427	+	LSP1	LSP1	H3k4me3	1vs<1	TSSS	0	-Inf
chr11	8932701	8932770	+	C11orf17	C11orf17	H3k4me3	1vs<1	TSSS	0.0147552786612044	-4.62225541675818
chr11	31839357	31839509	-	PAX6	PAX6	H3k4me3	1vs<1	TSSS	0.000935042221854506	-8.12028104233526
chr11	33061561	33061752	+	TCP11L1	TCP11L1	H3k4me3	1vs<1	TSSS	0.00227929593812706	-6.71206122326105
chr11	33757928	33758025	-	CD59	CD59	H3k4me3	1vs<1	TSSS	0.0240633370938534	-4.87833680208558
chr11	46368956	46369370	+	DGKZ	DGKZ	H3k4me3	1vs<1	TSSS	0.0144022105188061	-4.6470720455687
chr11	61129205	61129755	-	CYBASC3	CYBASC3	H3k4me3	1vs<1	TSSS	0.00881956740750702	-5.13763417483884
chr11	64781585	64781744	+	ARL2	ARL2	H3k4me3	1vs<1	TSSS	0.00140016491948433	-7.48206672596265
chr11	117103404	117103442	+	RNF214	RNF214	H3k4me3	1vs<1	TSSS	0.00117435270428331	-7.70990905863405
chr11	121163388	121163525	+	SC5DL	SC5DL	H3k4me3	1vs<1	TSSS	0.00517124324104567	-5.66097603352837
chr11	125495036	125495907	+	CHEK1	CHEK1	H3k4me3	1vs<1	TSSS	0.0143834865263355	-4.65775559514083
chr11	125756955	125757660	+	HYLS1	HYLS1	H3k4me3	1vs<1	TSSS	0.000193830021506181	10.7666218584341
chr11	133402159	133402403	-	OPCML	OPCML	H3k4me3	1vs<1	TSSS	0	-Inf
chr11	1874200	1874427	+	LSP1	LSP1	H3k9ac	1vs<1	TSSS	0	-Inf
chr11	8932701	8932770	+	C11orf17	C11orf17	H3k9ac	1vs<1	TSSS	0.00241975571607759	-6.5426089724073
chr11	46368956	46369370	+	DGKZ	DGKZ	H3k9ac	1vs<1	TSSS	0.000552624196134433	-8.65563855500794
chr11	61129205	61129755	-	CYBASC3	CYBASC3	H3k9ac	1vs<1	TSSS	0.00832930702529165	-5.16486600038886
chr11	64781585	64781744	+	ARL2	ARL2	H3k9ac	1vs<1	TSSS	0.000297040100955075	-9.74328566298835
chr11	67141518	67141648	-	CLCF1	CLCF1	H3k9ac	1vs<1	TSSS	0.00766220369712435	5.24372539656777
chr11	117103404	117103442	+	RNF214	RNF214	H3k9ac	1vs<1	TSSS	0.000879964194531131	-7.94142974588828
chr11	125756955	125757660	+	HYLS1	HYLS1	H3k9ac	1vs<1	TSSS	0.0059758799824078	5.51657638968807
chr11	61129205	61129755	-	CYBASC3	CYBASC3	H3k9me3	1vs<1	TSSS	0	-Inf
chr11	9786904	9787083	-	LOC440028	LOC440028	H4k20me1	1vs<1	TSSS	0	-Inf
chr11	1874200	1874427	+	LSP1	LSP1	H3k27ac	1vs<1	TSSS	0	-Inf
chr11	8932701	8932770	+	C11orf17	C11orf17	H3k27ac	1vs<1	TSSS	0.00257988707870323	-6.32986586615534
chr11	46368956	46369370	+	DGKZ	DGKZ	H3k27ac	1vs<1	TSSS	0.000233140243866569	-9.6210414492707
chr11	57195016	57195053	-	SLC43A3	SLC43A3	H3k27ac	1vs<1	TSSS	0.0462334342335979	3.54261687984029
chr11	58345492	58345639	-	LPXN	LPXN	H3k27ac	1vs<1	TSSS	0.010157618549422	-4.84373179436327
chr11	61129205	61129755	-	CYBASC3	CYBASC3	H3k27ac	1vs<1	TSSS	0.00616535906168606	-5.3872299341264
chr11	64781585	64781744	+	ARL2	ARL2	H3k27ac	1vs<1	TSSS	0.000218031156071824	-9.78107984972615
chr11	67141518	67141648	-	CLCF1	CLCF1	H3k27ac	1vs<1	TSSS	0.00504721743384767	5.63557519299011
chr11	121163388	121163525	+	SC5DL	SC5DL	H3k27ac	1vs<1	TSSS	0.0339600327363058	-3.79972549461812
chr11	125756955	125757660	+	HYLS1	HYLS1	H3k27ac	1vs<1	TSSS	0.00534259617031706	5.55789661356728
chr11	1874200	1874427	+	LSP1	LSP1	H3k79me2	1vs<1	TSSS	0	-Inf
chr11	33061561	33061752	+	TCP11L1	TCP11L1	H3k79me2	1vs<1	TSSS	0.0433685025709067	-4.12715979427187
chr11	61129205	61129755	-	CYBASC3	CYBASC3	H3k79me2	1vs<1	TSSS	0.000751855280669061	-8.44502127087164
chr11	1785475	1785501	-	MOB2	MOB2	H2az	1vs<1	TSSS	0.0169250941436797	-4.78728759545612
chr11	31839357	31839509	-	PAX6	PAX6	H2az	1vs<1	TSSS	0.00409103195433092	-6.71832482371477
chr11	46368956	46369370	+	DGKZ	DGKZ	H2az	1vs<1	TSSS	0.0151663469076472	-4.98650554260748
chr11	66725793	66725847	-	PC	PC	H2az	1vs<1	TSSS	0.0164046074895458	4.8615403547561
chr11	125756955	125757660	+	HYLS1	HYLS1	H2az	1vs<1	TSSS	0.0169250941436797	4.77963211317264
chr12	319371	319734	-	SLC6A12	SLC6A12	H3k4me1	0vs>0	SPLICING	0.0011455844106079	-12.5701067693104
chr12	10279170	10279307	-	CLEC7A	CLEC7A	H3k4me1	0vs>0	SPLICING	0	-Inf
chr12	58186769	58186856	+	TSFM	TSFM	H3k4me1	1vs<1	SPLICING	0	-Inf
chr12	319371	319734	-	SLC6A12	SLC6A12	H3k4me2	0vs>0	SPLICING	0	-Inf
chr12	10279170	10279307	-	CLEC7A	CLEC7A	H3k4me2	0vs>0	SPLICING	0	-Inf
chr12	319371	319734	-	SLC6A12	SLC6A12	H3k4me3	0vs>0	SPLICING	0	-Inf
chr12	10279170	10279307	-	CLEC7A	CLEC7A	H3k4me3	0vs>0	SPLICING	0	-Inf
chr12	56391399	56391507	+	SUOX	SUOX	H3k4me3	1vs<1	SPLICING	0.0285981980096458	-4.34725352114952
chr12	319371	319734	-	SLC6A12	SLC6A12	H3k9ac	0vs>0	SPLICING	0	-Inf
chr12	56391399	56391507	+	SUOX	SUOX	H3k9ac	1vs<1	SPLICING	0.00461938646217302	-5.78978469341246
chr12	98989211	98989335	+	SLC25A3	SLC25A3	H3k9me1	0vs>0	SPLICING	0	-Inf
chr12	48096471	48096629	-	RPAP3	RPAP3	H3k9me1	1vs<1	SPLICING	0	-Inf
chr12	56096835	56096962	-	ITGA7	ITGA7	H3k9me3	1vs<1	SPLICING	0	-Inf
chr12	319371	319734	-	SLC6A12	SLC6A12	H4k20me1	0vs>0	SPLICING	0	-Inf
chr12	56095163	56095200	-	ITGA7	ITGA7	H4k20me1	0vs>0	SPLICING	0	-Inf
chr12	58186769	58186856	+	TSFM	TSFM	H4k20me1	1vs<1	SPLICING	0	-Inf
chr12	110760797	110760877	+	ATP2A2	ATP2A2	H4k20me1	1vs<1	SPLICING	0	-Inf
chr12	113822656	113822751	+	PLBD2	PLBD2	H4k20me1	1vs<1	SPLICING	0	-Inf
chr12	319371	319734	-	SLC6A12	SLC6A12	H3k27ac	0vs>0	SPLICING	0.00334943422930493	-8.97438297848207
chr12	514677	514730	+	CCDC77	CCDC77	H3k27ac	1vs<1	SPLICING	0	-Inf
chr12	131693801	131694940	+	LOC116437	LOC116437	H3k27me3	0vs>0	SPLICING	0	-Inf
chr12	114204880	114205013	-	XLOC_007128	XLOC_007128	H3k27me3	1vs<1	SPLICING	0	-Inf
chr12	2974521	2974565	-	FOXM1	FOXM1	H3k36me3	0vs>0	SPLICING	0	-Inf
chr12	10279170	10279307	-	CLEC7A	CLEC7A	H3k36me3	0vs>0	SPLICING	0	-Inf
chr12	514677	514730	+	CCDC77	CCDC77	H3k36me3	1vs<1	SPLICING	0	-Inf
chr12	110760797	110760877	+	ATP2A2	ATP2A2	H3k36me3	1vs<1	SPLICING	0.000889217690141315	-8.59736595829868
chr12	10279170	10279307	-	CLEC7A	CLEC7A	H3k79me2	0vs>0	SPLICING	0	-Inf
chr12	514677	514730	+	CCDC77	CCDC77	H3k79me2	1vs<1	SPLICING	0.000716975658515749	-8.14285910270329
chr12	3103904	3104158	+	TEAD4	TEAD4	H3k79me2	1vs<1	SPLICING	0.00626970962064094	-6.24406141757405
chr12	110760797	110760877	+	ATP2A2	ATP2A2	H3k79me2	1vs<1	SPLICING	0.0449331425361631	-3.79410919884689
chr12	25705805	25705923	-	IFLTD1	IFLTD1	H2az	0vs>0	SPLICING	0	-Inf
chr12	25679033	25679152	-	IFLTD1	IFLTD1	H2az	1vs<1	SPLICING	0	-Inf
chr12	39727014	39727082	-	KIF21A	KIF21A	H2az	1vs<1	SPLICING	0	-Inf
chr12	56096835	56096962	-	ITGA7	ITGA7	H2az	1vs<1	SPLICING	0	-Inf
chr12	56391399	56391507	+	SUOX	SUOX	H2az	1vs<1	SPLICING	0.042953001701816	-3.69286200173263
chr12	42983267	42983572	-	PRICKLE1	PRICKLE1	H3k4me1	1vs<1	TSSS	0	-Inf
chr12	15475487	15475735	+	PTPRO	PTPRO	H3k4me2	1vs<1	TSSS	0.0191727713444482	5.6756102876687
chr12	42983267	42983572	-	PRICKLE1	PRICKLE1	H3k4me2	1vs<1	TSSS	0.000492583894128203	-11.4262460206184
chr12	53440810	53440847	+	TENC1	TENC1	H3k4me2	1vs<1	TSSS	0.0352184346310641	-4.15492734835443
chr12	56101261	56101686	-	ITGA7	ITGA7	H3k4me2	1vs<1	TSSS	0.0191652185920914	4.85064516360415
chr12	15475487	15475735	+	PTPRO	PTPRO	H3k4me3	1vs<1	TSSS	0.0154754270572328	5.28263602226346
chr12	55378369	55378456	-	KIAA0748	KIAA0748	H3k4me3	1vs<1	TSSS	0	-Inf
chr12	56101261	56101686	-	ITGA7	ITGA7	H3k4me3	1vs<1	TSSS	0.0344312267006661	3.77964113544309
chr12	108732804	108733094	-	CMKLR1	CMKLR1	H3k4me3	1vs<1	TSSS	0.00517124324104567	-6.84383085970378
chr12	120315053	120315092	-	CIT	CIT	H3k4me3	1vs<1	TSSS	0.032831193498018	3.82145648686756
chr12	120703420	120703563	-	PXN	PXN	H3k4me3	1vs<1	TSSS	0.0170308656891564	4.63818298360238
chr12	3068478	3068647	+	TEAD4	TEAD4	H3k9ac	1vs<1	TSSS	0.00377761133680491	-6.52715755111148
chr12	51664040	51664202	-	SMAGP	SMAGP	H3k9ac	1vs<1	TSSS	0.00316235420551719	-6.24293883951125
chr12	53440810	53440847	+	TENC1	TENC1	H3k9ac	1vs<1	TSSS	0.0489166743315718	3.49043590360512
chr12	54020063	54020199	-	ATF7	ATF7	H3k9ac	1vs<1	TSSS	0.00018496258596185	-10.6939087888707
chr12	55378369	55378456	-	KIAA0748	KIAA0748	H3k9ac	1vs<1	TSSS	0	-Inf
chr12	108732804	108733094	-	CMKLR1	CMKLR1	H3k9ac	1vs<1	TSSS	0.00377761133680491	-7.3579195110562
chr12	120703420	120703563	-	PXN	PXN	H3k9ac	1vs<1	TSSS	0.000270045377428153	10.420509609913
chr12	3068478	3068647	+	TEAD4	TEAD4	H3k27ac	1vs<1	TSSS	3.57482351931351e-05	-16.261205214846
chr12	51664040	51664202	-	SMAGP	SMAGP	H3k27ac	1vs<1	TSSS	0.00209510761528457	-6.56177143913303
chr12	53613734	53614150	-	RARG	RARG	H3k27ac	1vs<1	TSSS	0.0191124636014798	4.2707211017318
chr12	54020063	54020199	-	ATF7	ATF7	H3k27ac	1vs<1	TSSS	0.000620216333894718	-8.11284700598261
chr12	108732804	108733094	-	CMKLR1	CMKLR1	H3k27ac	1vs<1	TSSS	0.000382932084873544	-11.8450555787718
chr12	120315053	120315092	-	CIT	CIT	H3k27ac	1vs<1	TSSS	0.00948655916535679	4.90443611841451
chr12	42983267	42983572	-	PRICKLE1	PRICKLE1	H3k27me3	1vs<1	TSSS	9.36929351909364e-05	-13.5878094798613
chr12	3068478	3068647	+	TEAD4	TEAD4	H2az	1vs<1	TSSS	0.00618086726199325	-6.68633049970523
chr12	41831541	41831815	+	PDZRN4	PDZRN4	H2az	1vs<1	TSSS	0	-Inf
chr12	50677203	50677353	-	LIMA1	LIMA1	H2az	1vs<1	TSSS	0.00544419365634745	6.32584561334212
chr12	53613734	53614150	-	RARG	RARG	H2az	1vs<1	TSSS	0.00711516846872606	5.96261890404264
chr12	108732804	108733094	-	CMKLR1	CMKLR1	H2az	1vs<1	TSSS	0.0489283282549972	-4.10232076533484
chr12	120315053	120315092	-	CIT	CIT	H2az	1vs<1	TSSS	0.0165091051305467	4.84663840746949
chr13	76381616	76382335	+	LMO7	LMO7	H3k9me1	0vs>0	SPLICING	0	-Inf
chr13	39608268	39608333	-	C13orf23	C13orf23	H3k9me1	1vs<1	SPLICING	0	-Inf
chr13	41031651	41032805	-	LOC646982	LOC646982	H3k27me3	0vs>0	SPLICING	0.000582546355550796	-8.74512735178589
chr13	39608268	39608333	-	C13orf23	C13orf23	H3k36me3	1vs<1	SPLICING	0	-Inf
chr13	103459496	103460095	+	BIVM	BIVM	H3k79me2	1vs<1	SPLICING	0.000191690331762594	-11.3761897546907
chr13	21142024	21142136	+	IFT88	IFT88	H2az	0vs>0	SPLICING	0.0191045056072882	4.32710628073861
chr13	37005967	37006303	+	CCNA1	CCNA1	H3k4me1	1vs<1	TSSS	0.00647592722905909	-7.15638531342595
chr13	76194570	76196004	+	LMO7	LMO7	H3k4me1	1vs<1	TSSS	0.000431453051275399	-9.24071181745633
chr13	76194570	76196004	+	LMO7	LMO7	H3k4me2	1vs<1	TSSS	0.00767039649292023	-6.000990673557
chr13	113622757	113623028	+	MCF2L	MCF2L	H3k4me2	1vs<1	TSSS	0.0463529648073494	-7.71475581667235
chr13	114566806	114567046	-	GAS6	GAS6	H3k4me2	1vs<1	TSSS	0.0316854689495584	4.2988555485451
chr13	30881468	30881584	-	KATNAL1	KATNAL1	H3k4me3	1vs<1	TSSS	0.0223446617277008	-4.17489883780606
chr13	76194570	76196004	+	LMO7	LMO7	H3k4me3	1vs<1	TSSS	0	-Inf
chr13	30881468	30881584	-	KATNAL1	KATNAL1	H3k9ac	1vs<1	TSSS	0.0149378134299973	-4.58452770126682
chr13	37005967	37006303	+	CCNA1	CCNA1	H3k9ac	1vs<1	TSSS	0.0252506064375009	-4.69670606464476
chr13	43148291	43148658	+	TNFSF11	TNFSF11	H3k9ac	1vs<1	TSSS	0	-Inf
chr13	79980444	79980612	+	XLOC_007472	XLOC_007472	H3k9ac	1vs<1	TSSS	0.00136916995575594	-7.23257546001327
chr13	114566806	114567046	-	GAS6	GAS6	H3k9ac	1vs<1	TSSS	0.0104183179621406	4.92517675884202
chr13	43148291	43148658	+	TNFSF11	TNFSF11	H3k9me3	1vs<1	TSSS	0	-Inf
chr13	30881468	30881584	-	KATNAL1	KATNAL1	H3k27ac	1vs<1	TSSS	0.0129552724553622	-4.60987006352302
chr13	79980444	79980612	+	XLOC_007472	XLOC_007472	H3k27ac	1vs<1	TSSS	0.00624755711827453	-5.3614900831986
chr13	114566806	114567046	-	GAS6	GAS6	H2az	1vs<1	TSSS	0.0430309988917792	3.79352003948915
chr14	62036262	62036395	-	XLOC_008663	XLOC_008663	H3k4me1	1vs<1	SPLICING	0.0248657072023111	-4.94107491156302
chr14	24047078	24047203	-	AP1G2	AP1G2	H3k4me2	0vs>0	SPLICING	0	-Inf
chr14	24047078	24047203	-	AP1G2	AP1G2	H3k4me3	0vs>0	SPLICING	0	-Inf
chr14	105334761	105334892	+	KIAA0284	KIAA0284	H3k9ac	1vs<1	SPLICING	0	-Inf
chr14	104153418	104153548	+	KLC1	KLC1	H4k20me1	1vs<1	SPLICING	5.03146847218785e-05	-11.4880380229723
chr14	105960172	105960270	+	C14orf80	C14orf80	H4k20me1	1vs<1	SPLICING	0.000271306532674175	-9.08137352657534
chr14	104153418	104153548	+	KLC1	KLC1	H3k27ac	1vs<1	SPLICING	0.000554351744917625	-8.39912758549458
chr14	55251058	55251165	+	SAMD4A	SAMD4A	H3k36me3	0vs>0	SPLICING	0.00329266946639469	-6.6345386518965
chr14	50141068	50141145	-	POLE2	POLE2	H3k36me3	1vs<1	SPLICING	0.000837963520698366	-8.78124954981266
chr14	56117287	56117355	+	KTN1	KTN1	H3k36me3	1vs<1	SPLICING	2.45988730202506e-05	-14.5467274965437
chr14	102661275	102661457	+	WDR20	WDR20	H3k36me3	1vs<1	SPLICING	0.0107867667265146	-5.69465939645071
chr14	54868242	54868297	+	CDKN3	CDKN3	H3k79me2	1vs<1	SPLICING	0	-Inf
chr14	105334761	105334892	+	KIAA0284	KIAA0284	H3k79me2	1vs<1	SPLICING	0.0115388726644945	-5.12279046709895
chr14	55251058	55251165	+	SAMD4A	SAMD4A	H2az	0vs>0	SPLICING	8.1394658097178e-05	-10.2933953744202
chr14	23450470	23451848	-	JUB	JUB	H3k4me1	1vs<1	TSSS	0.00163864874561015	-7.36488615864242
chr14	66578585	66578713	+	XLOC_008135	XLOC_008135	H3k4me1	1vs<1	TSSS	0	-Inf
chr14	52118576	52118714	+	FRMD6	FRMD6	H3k4me2	1vs<1	TSSS	0.0126603314942638	5.31121168552256
chr14	69658194	69658308	+	EXD2	EXD2	H3k4me2	1vs<1	TSSS	0.00318501613617969	-7.18104455939663
chr14	23651973	23652849	-	SLC7A8	SLC7A8	H3k4me3	1vs<1	TSSS	0.0466993477165335	3.49498851629327
chr14	24458027	24458284	+	DHRS4L2	DHRS4L2	H3k4me3	1vs<1	TSSS	0.0445492031680755	-3.53824814006038
chr14	24836145	24836420	+	NFATC4	NFATC4	H3k4me3	1vs<1	TSSS	0.0403920698078701	-3.7887983173151
chr14	35099317	35099366	-	SNX6	SNX6	H3k4me3	1vs<1	TSSS	0.00561311681981722	-5.57014630484939
chr14	69658194	69658308	+	EXD2	EXD2	H3k4me3	1vs<1	TSSS	0.0148405534726195	-4.61168310566726
chr14	105957586	105957859	+	C14orf80	C14orf80	H3k4me3	1vs<1	TSSS	0.0221634945595726	-4.19033261774597
chr14	23450470	23451848	-	JUB	JUB	H3k9ac	1vs<1	TSSS	0.02602295127573	4.07490975024685
chr14	24458027	24458284	+	DHRS4L2	DHRS4L2	H3k9ac	1vs<1	TSSS	0.00316860134425407	-6.22952924541801
chr14	35099317	35099366	-	SNX6	SNX6	H3k9ac	1vs<1	TSSS	0.00627390044867995	-5.4664924711018
chr14	105957586	105957859	+	C14orf80	C14orf80	H3k9ac	1vs<1	TSSS	0.00204085524565834	-6.75977181844577
chr14	23450470	23451848	-	JUB	JUB	H3k27ac	1vs<1	TSSS	0.00508116371913987	5.61947871935339
chr14	24458027	24458284	+	DHRS4L2	DHRS4L2	H3k27ac	1vs<1	TSSS	0.00681026153859367	-5.25366367419552
chr14	35099317	35099366	-	SNX6	SNX6	H3k27ac	1vs<1	TSSS	0.00106716602819991	-7.37444988804998
chr14	55034637	55034830	+	SAMD4A	SAMD4A	H3k27ac	1vs<1	TSSS	0.0428063078560906	3.61476908752736
chr14	94759526	94759596	-	SERPINA10	SERPINA10	H3k27ac	1vs<1	TSSS	0	-Inf
chr14	105957586	105957859	+	C14orf80	C14orf80	H3k27ac	1vs<1	TSSS	0.00035773078554319	-8.90297596222082
chr14	23450470	23451848	-	JUB	JUB	H3k27me3	1vs<1	TSSS	0.000422308637179333	-9.28538276215652
chr14	23651973	23652849	-	SLC7A8	SLC7A8	H3k27me3	1vs<1	TSSS	0.0155185566438361	-5.26939675610974
chr14	23450470	23451848	-	JUB	JUB	H3k79me2	1vs<1	TSSS	0.00684612307747449	5.95655163293084
chr15	60682412	60682516	-	ANXA2	ANXA2	H3k4me1	0vs>0	SPLICING	0.0484592769265963	-4.24572148230679
chr15	41667910	41668026	+	NUSAP1	NUSAP1	H3k4me1	1vs<1	SPLICING	0	-Inf
chr15	60682412	60682516	-	ANXA2	ANXA2	H3k4me2	0vs>0	SPLICING	0.0339526693396593	-4.19765538334983
chr15	60689457	60689537	-	ANXA2	ANXA2	H3k4me2	0vs>0	SPLICING	0.0108191984243556	5.03881273601934
chr15	60689457	60689537	-	ANXA2	ANXA2	H3k4me3	0vs>0	SPLICING	4.04831515521286e-05	11.5005319963497
chr15	40998375	40998492	+	RAD51	RAD51	H3k9ac	1vs<1	SPLICING	0	-Inf
chr15	73567033	73567065	+	NEO1	NEO1	H3k9ac	1vs<1	SPLICING	0	-Inf
chr15	44867100	44867239	-	SPG11	SPG11	H3k9me1	1vs<1	SPLICING	0	-Inf
chr15	65140792	65140941	+	PLEKHO2	PLEKHO2	H3k9me3	1vs<1	SPLICING	0	-Inf
chr15	60689457	60689537	-	ANXA2	ANXA2	H3k27ac	0vs>0	SPLICING	0.00258937463538038	6.42562305717707
chr15	41667910	41668026	+	NUSAP1	NUSAP1	H3k27ac	1vs<1	SPLICING	0	-Inf
chr15	40998375	40998492	+	RAD51	RAD51	H3k36me3	1vs<1	SPLICING	0.000143682952905663	-11.3675972769641
chr15	91434212	91434421	+	FES	FES	H3k79me2	0vs>0	SPLICING	0.0441975539274444	-3.8431875988349
chr15	41667910	41668026	+	NUSAP1	NUSAP1	H2az	1vs<1	SPLICING	0	-Inf
chr15	83316607	83316728	-	CPEB1	CPEB1	H3k4me1	1vs<1	TSSS	0	-Inf
chr15	61521252	61521502	-	RORA	RORA	H3k4me2	1vs<1	TSSS	0.0269533403923366	4.47224057237503
chr15	83316607	83316728	-	CPEB1	CPEB1	H3k4me2	1vs<1	TSSS	0.0119929972323124	-5.81189820738628
chr15	61521252	61521502	-	RORA	RORA	H3k4me3	1vs<1	TSSS	0.0104925329740128	4.96137316398024
chr15	66585920	66586073	+	DIS3L	DIS3L	H3k4me3	1vs<1	TSSS	0.00255839860943436	6.56093776600593
chr15	93426073	93426416	+	LOC100507217	LOC100507217	H3k4me3	1vs<1	TSSS	0.00733428604728133	-5.30438773999261
chr15	76135622	76136187	+	UBE2Q2	UBE2Q2	H3k9ac	1vs<1	TSSS	0.0252506064375009	-4.11604376480964
chr15	93426073	93426416	+	LOC100507217	LOC100507217	H3k9ac	1vs<1	TSSS	0.000477978357239935	-8.92148178429906
chr15	79297059	79298002	-	RASGRF1	RASGRF1	H3k9me1	1vs<1	TSSS	0	-Inf
chr15	41576201	41576308	+	LOC729082	LOC729082	H3k27ac	1vs<1	TSSS	0.0484447062884714	3.49382891070672
chr15	66585920	66586073	+	DIS3L	DIS3L	H3k27ac	1vs<1	TSSS	0.0461035510895009	3.54996204173811
chr15	76135622	76136187	+	UBE2Q2	UBE2Q2	H3k27ac	1vs<1	TSSS	0.000159585347908565	-10.4290931836456
chr15	93426073	93426416	+	LOC100507217	LOC100507217	H3k27ac	1vs<1	TSSS	2.81821445819175e-06	-19.4032447575273
chr15	83316607	83316728	-	CPEB1	CPEB1	H3k27me3	1vs<1	TSSS	0.0185200840484442	-5.42155542295843
chr15	90437113	90437617	-	AP3S2	AP3S2	H3k79me2	1vs<1	TSSS	0.0170318270361331	-4.92187806267417
chr15	52043468	52043650	-	LYSMD2	LYSMD2	H2az	1vs<1	TSSS	0.00196241920768197	7.88519203075604
chr15	93426073	93426416	+	LOC100507217	LOC100507217	H2az	1vs<1	TSSS	0	-Inf
chr16	75286133	75286296	-	BCAR1	BCAR1	H3k4me1	0vs>0	SPLICING	0.0184968997610689	4.81815981412461
chr16	75298249	75298499	-	BCAR1	BCAR1	H3k4me1	0vs>0	SPLICING	0.00484083417328915	6.07120949487113
chr16	66860580	66860683	-	NAE1	NAE1	H3k4me1	1vs<1	SPLICING	0	-Inf
chr16	46919379	46919489	+	GPT2	GPT2	H3k4me2	0vs>0	SPLICING	0.00611150961406966	-6.06984687188558
chr16	75298249	75298499	-	BCAR1	BCAR1	H3k4me2	0vs>0	SPLICING	0.00442860715111474	5.92440982651785
chr16	1876508	1876603	-	HAGH	HAGH	H3k4me2	1vs<1	SPLICING	0.0387207390646303	-4.29449460238298
chr16	23668807	23668907	+	DCTN5	DCTN5	H3k4me3	0vs>0	SPLICING	0	-Inf
chr16	46919379	46919489	+	GPT2	GPT2	H3k4me3	0vs>0	SPLICING	0.00650422366261464	-5.48058300562556
chr16	75298249	75298499	-	BCAR1	BCAR1	H3k4me3	0vs>0	SPLICING	0.0100860237554889	4.67169238709814
chr16	1876508	1876603	-	HAGH	HAGH	H3k4me3	1vs<1	SPLICING	0.00353796043427175	-6.33402387561897
chr16	50778641	50778777	+	CYLD	CYLD	H3k9ac	0vs>0	SPLICING	0.0176824792868715	-4.43914564576666
chr16	75298249	75298499	-	BCAR1	BCAR1	H3k9ac	0vs>0	SPLICING	0.0146967119357505	4.60199897567672
chr16	1876508	1876603	-	HAGH	HAGH	H3k9ac	1vs<1	SPLICING	0.0018803638259232	-6.69167569842164
chr16	23668807	23668907	+	DCTN5	DCTN5	H3k9me3	0vs>0	SPLICING	0	-Inf
chr16	75286133	75286296	-	BCAR1	BCAR1	H3k9me3	0vs>0	SPLICING	0	-Inf
chr16	75298249	75298499	-	BCAR1	BCAR1	H3k9me3	0vs>0	SPLICING	0	-Inf
chr16	87343903	87343939	-	LOC100506581	LOC100506581	H3k9me3	0vs>0	SPLICING	0	-Inf
chr16	981642	981793	-	LMF1	LMF1	H4k20me1	0vs>0	SPLICING	0	-Inf
chr16	1808149	1808160	+	MAPK8IP3	MAPK8IP3	H4k20me1	0vs>0	SPLICING	0	-Inf
chr16	23668807	23668907	+	DCTN5	DCTN5	H4k20me1	0vs>0	SPLICING	0	-Inf
chr16	66860580	66860683	-	NAE1	NAE1	H4k20me1	1vs<1	SPLICING	0	-Inf
chr16	1876508	1876603	-	HAGH	HAGH	H3k27ac	1vs<1	SPLICING	0.000390077113792192	-8.9482531813807
chr16	55883536	55883685	-	CES5A	CES5A	H3k27me3	0vs>0	SPLICING	0	-Inf
chr16	75286133	75286296	-	BCAR1	BCAR1	H3k27me3	0vs>0	SPLICING	0	-Inf
chr16	75298249	75298499	-	BCAR1	BCAR1	H3k27me3	0vs>0	SPLICING	0	-Inf
chr16	12798481	12798906	-	CPPED1	CPPED1	H3k27me3	1vs<1	SPLICING	0	-Inf
chr16	69680420	69680481	+	NFAT5	NFAT5	H3k36me3	0vs>0	SPLICING	0	-Inf
chr16	66860580	66860683	-	NAE1	NAE1	H3k36me3	1vs<1	SPLICING	0.00451354424840268	-6.61138386830779
chr16	75298249	75298499	-	BCAR1	BCAR1	H3k79me2	0vs>0	SPLICING	0.00376806000194288	6.20371174846339
chr16	87344756	87344902	-	LOC100506581	LOC100506581	H3k79me2	0vs>0	SPLICING	0	-Inf
chr16	66860580	66860683	-	NAE1	NAE1	H3k79me2	1vs<1	SPLICING	0.00211204464489161	-6.85261823995865
chr16	19422057	19422498	+	TMC5	TMC5	H3k4me1	1vs<1	TSSS	0.000699858702470393	-8.56087757180285
chr16	27413483	27413939	+	IL21R	IL21R	H3k4me1	1vs<1	TSSS	0.00411020735927621	-6.95140277415456
chr16	83986827	83986975	+	OSGIN1	OSGIN1	H3k4me1	1vs<1	TSSS	0.0018850973836122	-7.19040708375853
chr16	85646924	85647004	+	KIAA0182	KIAA0182	H3k4me1	1vs<1	TSSS	0.00108291563655952	-7.98106268006455
chr16	19422057	19422498	+	TMC5	TMC5	H3k4me2	1vs<1	TSSS	0.00709754334302026	-6.11034681461034
chr16	27413483	27413939	+	IL21R	IL21R	H3k4me2	1vs<1	TSSS	0.0091071240553271	-6.22987723461933
chr16	66878282	66878430	+	CA7	CA7	H3k4me2	1vs<1	TSSS	0	-Inf
chr16	67260878	67260901	-	LRRC29	LRRC29	H3k4me2	1vs<1	TSSS	0.0267329307350938	-4.49620810805932
chr16	83986827	83986975	+	OSGIN1	OSGIN1	H3k4me2	1vs<1	TSSS	0.005126076495281	-6.62312565043949
chr16	85646924	85647004	+	KIAA0182	KIAA0182	H3k4me2	1vs<1	TSSS	0.00061362498112414	9.59509495336115
chr16	19422057	19422498	+	TMC5	TMC5	H3k4me3	1vs<1	TSSS	0.0150148090504072	-4.59590580894916
chr16	27413483	27413939	+	IL21R	IL21R	H3k4me3	1vs<1	TSSS	0.0029299978809513	-6.97807414674272
chr16	28608318	28608391	-	SULT1A2	SULT1A2	H3k4me3	1vs<1	TSSS	0.0352260219915155	-3.74867510172377
chr16	66878282	66878430	+	CA7	CA7	H3k4me3	1vs<1	TSSS	0	-Inf
chr16	67260878	67260901	-	LRRC29	LRRC29	H3k4me3	1vs<1	TSSS	0.00495109939886468	-5.76871956553691
chr16	69139467	69139690	+	HAS3	HAS3	H3k4me3	1vs<1	TSSS	0.00475268189145601	5.81424856122897
chr16	77224836	77225155	+	MON1B	MON1B	H3k4me3	1vs<1	TSSS	0.00189255863595748	-6.99825330116543
chr16	89627090	89627120	+	RPL13	RPL13	H3k4me3	1vs<1	TSSS	0.00458697926259257	-5.86532401031482
chr16	640077	640119	+	RAB40C	RAB40C	H3k9ac	1vs<1	TSSS	0	-Inf
chr16	1020788	1020984	-	LMF1	LMF1	H3k9ac	1vs<1	TSSS	0.0307093064599777	-3.93918477682412
chr16	11680742	11680806	-	LITAF	LITAF	H3k9ac	1vs<1	TSSS	0.0146448773048748	-4.6060140365029
chr16	27413483	27413939	+	IL21R	IL21R	H3k9ac	1vs<1	TSSS	0.00169386983578691	-7.68685871902909
chr16	28608318	28608391	-	SULT1A2	SULT1A2	H3k9ac	1vs<1	TSSS	0.00523200282023058	-5.65787272063215
chr16	67260878	67260901	-	LRRC29	LRRC29	H3k9ac	1vs<1	TSSS	0.00023096308934954	-10.242465514191
chr16	72127266	72127539	-	TXNL4B	TXNL4B	H3k9ac	1vs<1	TSSS	0.0354395571312101	3.82476261314101
chr16	77224836	77225155	+	MON1B	MON1B	H3k9ac	1vs<1	TSSS	7.17295061994292e-05	-12.6627685232603
chr16	85646924	85647004	+	KIAA0182	KIAA0182	H3k9ac	1vs<1	TSSS	0.0459585054140761	3.54944586061728
chr16	89627090	89627120	+	RPL13	RPL13	H3k9ac	1vs<1	TSSS	0.0155748531595797	-4.53407962175927
chr16	28996147	28996248	+	LAT	LAT	H4k20me1	1vs<1	TSSS	0	-Inf
chr16	1020788	1020984	-	LMF1	LMF1	H3k27ac	1vs<1	TSSS	0.0106550027777559	-4.78641909499068
chr16	11680742	11680806	-	LITAF	LITAF	H3k27ac	1vs<1	TSSS	0.000202269602097416	-9.96275426559373
chr16	27413483	27413939	+	IL21R	IL21R	H3k27ac	1vs<1	TSSS	0.0114226897617906	-5.03594196645266
chr16	67260878	67260901	-	LRRC29	LRRC29	H3k27ac	1vs<1	TSSS	0.000620216333894718	-8.12353450667519
chr16	77224836	77225155	+	MON1B	MON1B	H3k27ac	1vs<1	TSSS	0.000111871078040483	-11.0161408912937
chr16	89627090	89627120	+	RPL13	RPL13	H3k27ac	1vs<1	TSSS	0.00616535906168606	-5.38405609498116
chr16	67001378	67001802	+	CES3	CES3	H3k27me3	1vs<1	TSSS	1.53621939762664e-05	-15.0976302874183
chr16	85646924	85647004	+	KIAA0182	KIAA0182	H3k27me3	1vs<1	TSSS	0	-Inf
chr16	72127266	72127539	-	TXNL4B	TXNL4B	H3k79me2	1vs<1	TSSS	0.0170318270361331	5.02025347911399
chr16	89627090	89627120	+	RPL13	RPL13	H3k79me2	1vs<1	TSSS	0.0302355456015288	-4.45540616340839
chr16	19422057	19422498	+	TMC5	TMC5	H2az	1vs<1	TSSS	0.00711516846872606	-5.97188826343019
chr16	27413483	27413939	+	IL21R	IL21R	H2az	1vs<1	TSSS	0.0115628957886723	-5.78911880994249
chr16	67260878	67260901	-	LRRC29	LRRC29	H2az	1vs<1	TSSS	0.000621496057863579	-9.67954061523578
chr16	69139467	69139690	+	HAS3	HAS3	H2az	1vs<1	TSSS	0.0352503425166612	4.01838256552657
chr16	72127266	72127539	-	TXNL4B	TXNL4B	H2az	1vs<1	TSSS	0.0426355084276307	3.9821181833098
chr16	85646924	85647004	+	KIAA0182	KIAA0182	H2az	1vs<1	TSSS	0.0103545357819767	-5.59278763301221
chr17	7536070	7536277	+	SHBG	SHBG	H3k4me1	0vs>0	SPLICING	0.0254015476051152	-4.54707595406613
chr17	43343617	43343885	+	LOC100133991	LOC100133991	H3k4me1	0vs>0	SPLICING	0.000553628274293299	-8.6584559632452
chr17	25630393	25630661	+	WSB1	WSB1	H3k4me1	1vs<1	SPLICING	0	-Inf
chr17	7536070	7536277	+	SHBG	SHBG	H3k4me2	0vs>0	SPLICING	0.0323694079865861	-4.05786069509007
chr17	7536070	7536277	+	SHBG	SHBG	H3k4me3	0vs>0	SPLICING	0	-Inf
chr17	7536070	7536277	+	SHBG	SHBG	H3k9ac	0vs>0	SPLICING	0	-Inf
chr17	42148996	42149189	+	G6PC3	G6PC3	H3k9ac	0vs>0	SPLICING	0.0131174786934565	4.71321298115394
chr17	43343617	43343885	+	LOC100133991	LOC100133991	H3k9ac	0vs>0	SPLICING	0.00058398655917631	-7.93322998884041
chr17	19282209	19282445	+	MAPK7	MAPK7	H3k9ac	1vs<1	SPLICING	0.00170539386961525	-6.91848672946232
chr17	19186263	19187027	+	EPN2	EPN2	H3k9me1	1vs<1	SPLICING	0	-Inf
chr17	38504568	38504716	+	RARA	RARA	H3k9me1	1vs<1	SPLICING	0	-Inf
chr17	42544465	42544482	-	GPATCH8	GPATCH8	H3k9me3	0vs>0	SPLICING	0	-Inf
chr17	17796975	17797124	-	TOM1L2	TOM1L2	H3k9me3	1vs<1	SPLICING	0	-Inf
chr17	7536070	7536277	+	SHBG	SHBG	H4k20me1	0vs>0	SPLICING	0	-Inf
chr17	19282209	19282445	+	MAPK7	MAPK7	H4k20me1	1vs<1	SPLICING	2.20797349530376e-05	-12.9142599497253
chr17	27844471	27844674	+	TAOK1	TAOK1	H4k20me1	1vs<1	SPLICING	0	-Inf
chr17	27849298	27849537	+	TAOK1	TAOK1	H4k20me1	1vs<1	SPLICING	0	-Inf
chr17	7536070	7536277	+	SHBG	SHBG	H3k27ac	0vs>0	SPLICING	0	-Inf
chr17	43343617	43343885	+	LOC100133991	LOC100133991	H3k27ac	0vs>0	SPLICING	0.000473316237121591	-8.44640220039687
chr17	76212745	76212862	+	BIRC5	BIRC5	H3k27ac	0vs>0	SPLICING	0	-Inf
chr17	19282209	19282445	+	MAPK7	MAPK7	H3k27ac	1vs<1	SPLICING	0.0140778469153646	-4.95908543426369
chr17	17796975	17797124	-	TOM1L2	TOM1L2	H3k27me3	1vs<1	SPLICING	0	-Inf
chr17	27412622	27412666	-	MYO18A	MYO18A	H3k36me3	0vs>0	SPLICING	0	-Inf
chr17	17796975	17797124	-	TOM1L2	TOM1L2	H3k36me3	1vs<1	SPLICING	0.00576609175786136	-6.31476333983236
chr17	19283095	19283260	+	MAPK7	MAPK7	H3k36me3	1vs<1	SPLICING	0.0220957867530101	4.84026121408341
chr17	27844471	27844674	+	TAOK1	TAOK1	H3k36me3	1vs<1	SPLICING	0.0166898306867982	-5.16145078097871
chr17	27849298	27849537	+	TAOK1	TAOK1	H3k36me3	1vs<1	SPLICING	0.010933562534906	-5.65635430758839
chr17	34862295	34862447	-	MYO19	MYO19	H3k36me3	1vs<1	SPLICING	0.00199706638665758	-7.63818124950246
chr17	34862802	34862978	-	MYO19	MYO19	H3k36me3	1vs<1	SPLICING	0.00692726181594976	-6.11595534692318
chr17	73170847	73170918	-	SUMO2	SUMO2	H3k36me3	1vs<1	SPLICING	0.0224456623461758	-4.77630050391853
chr17	7536070	7536277	+	SHBG	SHBG	H3k79me2	0vs>0	SPLICING	0	-Inf
chr17	73170847	73170918	-	SUMO2	SUMO2	H3k79me2	1vs<1	SPLICING	0.000257233252170271	-9.41774490349495
chr17	7536070	7536277	+	SHBG	SHBG	H2az	0vs>0	SPLICING	0.0120108521222025	-4.70204660444031
chr17	12487877	12488038	+	FLJ34690	FLJ34690	H2az	0vs>0	SPLICING	0	-Inf
chr17	19282209	19282445	+	MAPK7	MAPK7	H2az	1vs<1	SPLICING	0.0178087714589261	-4.37948910331211
chr17	7017934	7018128	-	ASGR2	ASGR2	H3k4me1	1vs<1	TSSS	0	-Inf
chr17	37894590	37894645	+	GRB7	GRB7	H3k4me2	1vs<1	TSSS	0.00238000234830171	-12.3419568429196
chr17	40169358	40169715	-	DNAJC7	DNAJC7	H3k4me2	1vs<1	TSSS	0.0091071240553271	-5.74658213242297
chr17	43502930	43503012	-	ARHGAP27	ARHGAP27	H3k4me2	1vs<1	TSSS	0.016176514088018	5.00701307999477
chr17	46178630	46178883	-	CBX1	CBX1	H3k4me2	1vs<1	TSSS	0.0111771752445163	-5.46085255717449
chr17	80186889	80186982	+	SLC16A3	SLC16A3	H3k4me2	1vs<1	TSSS	0.00709754334302026	-6.12212088802325
chr17	3796233	3796337	-	CAMKK1	CAMKK1	H3k4me3	1vs<1	TSSS	0.0374307020728604	3.73704052544027
chr17	36584720	36584792	+	ARHGAP23	ARHGAP23	H3k4me3	1vs<1	TSSS	0.0247997667742623	-4.30166173412577
chr17	37894590	37894645	+	GRB7	GRB7	H3k4me3	1vs<1	TSSS	0.00517124324104567	-8.08359766964622
chr17	40169358	40169715	-	DNAJC7	DNAJC7	H3k4me3	1vs<1	TSSS	0.0164808734016087	-4.49047733295809
chr17	41623229	41623305	-	ETV4	ETV4	H3k4me3	1vs<1	TSSS	0.00207074609179871	-7.58968562531651
chr17	43325303	43325370	+	LOC100133991	LOC100133991	H3k4me3	1vs<1	TSSS	0.0178298940863424	4.40884354958041
chr17	43502930	43503012	-	ARHGAP27	ARHGAP27	H3k4me3	1vs<1	TSSS	0.0228141272970478	4.14484060063845
chr17	64188115	64188212	-	CCDC46	CCDC46	H3k4me3	1vs<1	TSSS	0.0123986339606216	4.78228219105226
chr17	76124693	76124861	-	TMC6	TMC6	H3k4me3	1vs<1	TSSS	0.000518488428948503	9.0112253908493
chr17	80416540	80416706	+	NARF	NARF	H3k4me3	1vs<1	TSSS	0.000938348989899265	-8.06753788260398
chr17	15165746	15165889	-	PMP22	PMP22	H3k9ac	1vs<1	TSSS	0.0327098101597957	3.87610115170835
chr17	18163848	18164051	+	SMCR7	SMCR7	H3k9ac	1vs<1	TSSS	0.0336825436565627	4.17024386964588
chr17	37783179	37783726	+	PPP1R1B	PPP1R1B	H3k9ac	1vs<1	TSSS	0.00555389451871938	-6.74536976895798
chr17	40169358	40169715	-	DNAJC7	DNAJC7	H3k9ac	1vs<1	TSSS	0.0395443227953522	-3.67862804908388
chr17	40346411	40346550	-	GHDC	GHDC	H3k9ac	1vs<1	TSSS	0.000987536243453482	-7.77017415948519
chr17	41623229	41623305	-	ETV4	ETV4	H3k9ac	1vs<1	TSSS	0.00440219994769106	-6.33004613416748
chr17	64188115	64188212	-	CCDC46	CCDC46	H3k9ac	1vs<1	TSSS	0.00142173043418479	7.17860010295364
chr17	76124693	76124861	-	TMC6	TMC6	H3k9ac	1vs<1	TSSS	0.0366948034323562	3.74842069129063
chr17	79869143	79869340	-	PCYT2	PCYT2	H3k9ac	1vs<1	TSSS	4.66510626275851e-06	-18.3931595316862
chr17	80416540	80416706	+	NARF	NARF	H3k9ac	1vs<1	TSSS	0.000133440061230795	-11.3350824103023
chr17	4487276	4487393	+	SMTNL2	SMTNL2	H3k9me3	1vs<1	TSSS	0	-Inf
chr17	40346411	40346550	-	GHDC	GHDC	H3k27ac	1vs<1	TSSS	0.00355939692558303	-6.00238667696367
chr17	41623229	41623305	-	ETV4	ETV4	H3k27ac	1vs<1	TSSS	0.0149130247145009	-4.76011510403555
chr17	79829174	79829282	-	ARHGDIA	ARHGDIA	H3k27ac	1vs<1	TSSS	0.00624755711827453	-5.35628997037657
chr17	79869143	79869340	-	PCYT2	PCYT2	H3k27ac	1vs<1	TSSS	6.65049389575468e-06	-17.1429750156503
chr17	80416540	80416706	+	NARF	NARF	H3k27ac	1vs<1	TSSS	0.000323347564058508	-9.07451461828158
chr17	15165746	15165889	-	PMP22	PMP22	H3k27me3	1vs<1	TSSS	0.0010921961344477	-8.09573263784604
chr17	76124693	76124861	-	TMC6	TMC6	H3k27me3	1vs<1	TSSS	0	-Inf
chr17	40169358	40169715	-	DNAJC7	DNAJC7	H3k79me2	1vs<1	TSSS	0.0142647084434161	-5.11424437116635
chr17	7533453	7533601	+	SHBG	SHBG	H2az	1vs<1	TSSS	0	-Inf
chr17	15165746	15165889	-	PMP22	PMP22	H2az	1vs<1	TSSS	0.00618086726199325	6.14546191683705
chr17	31618426	31620006	-	ACCN1	ACCN1	H2az	1vs<1	TSSS	0.0352503425166612	6.02997809096513
chr17	37783179	37783726	+	PPP1R1B	PPP1R1B	H2az	1vs<1	TSSS	0.0115628957886723	-6.4453609039523
chr17	41623229	41623305	-	ETV4	ETV4	H2az	1vs<1	TSSS	0.0236222359055315	-4.71493963146152
chr17	56296512	56296666	-	MKS1	MKS1	H2az	1vs<1	TSSS	0.00578926268577903	6.22688193035074
chr17	76124693	76124861	-	TMC6	TMC6	H2az	1vs<1	TSSS	0.018801614174768	4.67996289417166
chr17	80416540	80416706	+	NARF	NARF	H2az	1vs<1	TSSS	0.00310400556807462	-7.13264583259936
chr18	77170403	77171501	+	NFATC1	NFATC1	H3k4me3	0vs1	SPLICING	0	-Inf
chr18	5293971	5294000	-	ZFP161	ZFP161	H3k4me3	1vs<1	SPLICING	6.35916543224781e-05	-11.5605685781432
chr18	5293971	5294000	-	ZFP161	ZFP161	H3k9ac	1vs<1	SPLICING	3.3612664359616e-05	-12.1499107449599
chr18	77170403	77171501	+	NFATC1	NFATC1	H3k9me3	0vs1	SPLICING	0.030012001575877	-3.37196321878758
chr18	77170403	77171501	+	NFATC1	NFATC1	H3k27me3	0vs1	SPLICING	0	-Inf
chr18	44101060	44101245	-	LOXHD1	LOXHD1	H3k27me3	0vs>0	SPLICING	0	-Inf
chr18	5293971	5294000	-	ZFP161	ZFP161	H3k79me2	1vs<1	SPLICING	4.22904621005766e-05	-12.6940872873598
chr18	77170403	77171501	+	NFATC1	NFATC1	H2az	0vs1	SPLICING	0	-Inf
chr18	21594384	21595002	+	TTC39C	TTC39C	H3k4me1	1vs<1	TSSS	0.00659594658901093	-5.82938403503575
chr18	24126692	24128500	-	KCTD1	KCTD1	H3k4me1	1vs<1	TSSS	0.00135192024304073	-7.63199600720796
chr18	13218786	13218987	+	C18orf1	C18orf1	H3k4me2	1vs<1	TSSS	0.00919641287762453	-5.71813458439437
chr18	24126692	24128500	-	KCTD1	KCTD1	H3k4me2	1vs<1	TSSS	0.0475056952298328	-3.87883917939385
chr18	32621324	32621625	+	MAPRE2	MAPRE2	H3k4me2	1vs<1	TSSS	0.0385859493904254	4.06060387226069
chr18	13218786	13218987	+	C18orf1	C18orf1	H3k4me3	1vs<1	TSSS	0.0171614530917988	-4.44863625027328
chr18	21594384	21595002	+	TTC39C	TTC39C	H3k4me3	1vs<1	TSSS	0.000194126879242871	-10.7125878980309
chr18	42260863	42260986	+	SETBP1	SETBP1	H3k4me3	1vs<1	TSSS	0.0260398030419715	-4.24638515120794
chr18	11689136	11689938	+	GNAL	GNAL	H3k9ac	1vs<1	TSSS	0.00220422025956431	7.33391748361439
chr18	21594384	21595002	+	TTC39C	TTC39C	H3k9ac	1vs<1	TSSS	0.00316235420551719	-6.25652419228121
chr18	21977619	21977790	-	OSBPL1A	OSBPL1A	H3k9ac	1vs<1	TSSS	0.0104183179621406	4.93827151565895
chr18	32621324	32621625	+	MAPRE2	MAPRE2	H3k9ac	1vs<1	TSSS	0.0330747712724375	3.86339806688322
chr18	24126692	24128500	-	KCTD1	KCTD1	H3k9me3	1vs<1	TSSS	0.0115212072991028	-6.28215273493027
chr18	24126692	24128500	-	KCTD1	KCTD1	H4k20me1	1vs<1	TSSS	0.00645536408090862	-5.76642361687859
chr18	11689136	11689938	+	GNAL	GNAL	H3k27ac	1vs<1	TSSS	0.0137292933751499	5.90425540079894
chr18	21594384	21595002	+	TTC39C	TTC39C	H3k27ac	1vs<1	TSSS	0.00534259617031706	-5.56076066449448
chr18	21718955	21719082	+	CABYR	CABYR	H3k27ac	1vs<1	TSSS	0.0227320298414971	-4.36091547704921
chr18	21977619	21977790	-	OSBPL1A	OSBPL1A	H3k27ac	1vs<1	TSSS	0.0156187731764438	4.42821716704258
chr18	32621324	32621625	+	MAPRE2	MAPRE2	H3k27ac	1vs<1	TSSS	0.0348567538227465	3.77656420641662
chr18	21977619	21977790	-	OSBPL1A	OSBPL1A	H3k27me3	1vs<1	TSSS	0	-Inf
chr18	24126692	24128500	-	KCTD1	KCTD1	H3k27me3	1vs<1	TSSS	0.000399898498618587	-9.42272427297029
chr18	21594384	21595002	+	TTC39C	TTC39C	H3k79me2	1vs<1	TSSS	0.000439099079339501	-9.47259607412778
chr18	24126692	24128500	-	KCTD1	KCTD1	H2az	1vs<1	TSSS	0.0342527377920332	-4.08466539007919
chr19	18548409	18548570	-	ISYNA1	ISYNA1	H3k4me1	0vs>0	SPLICING	0.0048948659408022	-5.99190696403834
chr19	7832402	7832514	+	CLEC4M	CLEC4M	H3k4me1	1vs<1	SPLICING	0	-Inf
chr19	8369915	8370040	-	CD320	CD320	H3k4me1	1vs<1	SPLICING	0.000470891790846915	-8.86194423842917
chr19	8434103	8434216	+	ANGPTL4	ANGPTL4	H3k4me1	1vs<1	SPLICING	0	-Inf
chr19	47731415	47731703	-	BBC3	BBC3	H3k4me1	1vs<1	SPLICING	0.00415002204518994	-6.30678619507736
chr19	58695288	58695365	+	ZNF274	ZNF274	H3k4me1	1vs<1	SPLICING	0.000887772000567248	-7.95893354857478
chr19	18547783	18547915	-	ISYNA1	ISYNA1	H3k4me2	0vs>0	SPLICING	0.00160876103049257	7.16272805635987
chr19	18548409	18548570	-	ISYNA1	ISYNA1	H3k4me2	0vs>0	SPLICING	0.00350829760741605	6.21375679402513
chr19	49309774	49309974	-	BCAT2	BCAT2	H3k4me2	1vs<1	SPLICING	0	-Inf
chr19	49310257	49310331	-	BCAT2	BCAT2	H3k4me2	1vs<1	SPLICING	0	-Inf
chr19	49494559	49494740	-	GYS1	GYS1	H3k4me2	1vs<1	SPLICING	0.0467556900368273	-4.05271475167368
chr19	18547783	18547915	-	ISYNA1	ISYNA1	H3k4me3	0vs>0	SPLICING	0.0446556613441615	3.50780747882438
chr19	18548409	18548570	-	ISYNA1	ISYNA1	H3k4me3	0vs>0	SPLICING	0.00583991265278208	5.21535375980859
chr19	44530178	44530238	+	ZNF222	ZNF222	H3k4me3	0vs>0	SPLICING	0.00496941477719779	5.42611352708636
chr19	11624619	11625036	-	ECSIT	ECSIT	H3k4me3	1vs<1	SPLICING	0	-Inf
chr19	35433498	35433577	+	ZNF30	ZNF30	H3k4me3	1vs<1	SPLICING	0	-Inf
chr19	47731415	47731703	-	BBC3	BBC3	H3k4me3	1vs<1	SPLICING	0.000947254847732327	-7.78669301080829
chr19	49309774	49309974	-	BCAT2	BCAT2	H3k4me3	1vs<1	SPLICING	0	-Inf
chr19	49310257	49310331	-	BCAT2	BCAT2	H3k4me3	1vs<1	SPLICING	0	-Inf
chr19	49494559	49494740	-	GYS1	GYS1	H3k4me3	1vs<1	SPLICING	0.00891323558035368	-5.37555274974204
chr19	52431148	52431247	+	ZNF613	ZNF613	H3k4me3	1vs<1	SPLICING	0.0157978287299395	-4.83470638855314
chr19	58697079	58697205	+	ZNF274	ZNF274	H3k4me3	1vs<1	SPLICING	0	-Inf
chr19	47729821	47730011	-	BBC3	BBC3	H3k9ac	1vs<1	SPLICING	0.00377859541755323	6.28553566236482
chr19	47731415	47731703	-	BBC3	BBC3	H3k9ac	1vs<1	SPLICING	0.000415799440930093	-8.61418937957072
chr19	49310257	49310331	-	BCAT2	BCAT2	H3k9ac	1vs<1	SPLICING	0	-Inf
chr19	49494559	49494740	-	GYS1	GYS1	H3k9ac	1vs<1	SPLICING	0.00149152758343607	-7.10181039721967
chr19	52431148	52431247	+	ZNF613	ZNF613	H3k9ac	1vs<1	SPLICING	0.00629710580978638	-5.45966283569972
chr19	18548409	18548570	-	ISYNA1	ISYNA1	H3k9me3	0vs>0	SPLICING	0	-Inf
chr19	37008932	37009045	-	ZNF260	ZNF260	H3k9me3	0vs>0	SPLICING	0.0114876889089946	-5.18352635509873
chr19	53626754	53626908	-	ZNF415	ZNF415	H3k9me3	0vs>0	SPLICING	0	-Inf
chr19	57986392	57986514	-	ZNF772	ZNF772	H3k9me3	0vs>0	SPLICING	0.017183776703854	-4.72758053300105
chr19	8369915	8370040	-	CD320	CD320	H3k9me3	1vs<1	SPLICING	0	-Inf
chr19	32882022	32882092	-	XLOC_014244	XLOC_014244	H3k9me3	1vs<1	SPLICING	0	-Inf
chr19	35433498	35433577	+	ZNF30	ZNF30	H3k9me3	1vs<1	SPLICING	0.00942112496658505	-5.26944227954748
chr19	53217268	53217394	-	ZNF611	ZNF611	H3k9me3	1vs<1	SPLICING	0	-Inf
chr19	58695288	58695365	+	ZNF274	ZNF274	H3k9me3	1vs<1	SPLICING	0.008851692130148	-5.38361096438133
chr19	58697079	58697205	+	ZNF274	ZNF274	H3k9me3	1vs<1	SPLICING	0.00966571801019804	-5.19684285257938
chr19	2098975	2099028	+	IZUMO4	IZUMO4	H4k20me1	0vs>0	SPLICING	0	-Inf
chr19	16321171	16321206	+	AP1M1	AP1M1	H4k20me1	0vs>0	SPLICING	0	-Inf
chr19	38797554	38797630	-	YIF1B	YIF1B	H4k20me1	0vs>0	SPLICING	0	-Inf
chr19	45801401	45801480	+	MARK4	MARK4	H4k20me1	0vs>0	SPLICING	0	-Inf
chr19	5684830	5684916	+	HSD11B1L	HSD11B1L	H4k20me1	1vs<1	SPLICING	0	-Inf
chr19	8369915	8370040	-	CD320	CD320	H4k20me1	1vs<1	SPLICING	0	-Inf
chr19	9448472	9448534	+	ZNF177	ZNF177	H4k20me1	1vs<1	SPLICING	0	-Inf
chr19	9449869	9449995	+	ZNF177	ZNF177	H4k20me1	1vs<1	SPLICING	0	-Inf
chr19	11623871	11624094	-	ECSIT	ECSIT	H4k20me1	1vs<1	SPLICING	0	-Inf
chr19	11624619	11625036	-	ECSIT	ECSIT	H4k20me1	1vs<1	SPLICING	0.00199208266880291	-6.80986653694724
chr19	49458944	49459090	+	BAX	BAX	H4k20me1	1vs<1	SPLICING	2.20797349530376e-05	-12.8636440836167
chr19	2098975	2099028	+	IZUMO4	IZUMO4	H3k27ac	0vs>0	SPLICING	0	-Inf
chr19	5686427	5686538	+	HSD11B1L	HSD11B1L	H3k27ac	0vs>0	SPLICING	0.0298583070439544	-4.10599465978257
chr19	8369915	8370040	-	CD320	CD320	H3k27ac	1vs<1	SPLICING	0	-Inf
chr19	11624619	11625036	-	ECSIT	ECSIT	H3k27ac	1vs<1	SPLICING	0.0329054467957986	-4.25449939985135
chr19	47731415	47731703	-	BBC3	BBC3	H3k27ac	1vs<1	SPLICING	0.00134024075529654	-7.3735862010647
chr19	49309774	49309974	-	BCAT2	BCAT2	H3k27ac	1vs<1	SPLICING	0	-Inf
chr19	49310257	49310331	-	BCAT2	BCAT2	H3k27ac	1vs<1	SPLICING	5.86589797359137e-05	-11.7204180621619
chr19	5229502	5229695	-	PTPRS	PTPRS	H3k27me3	1vs<1	SPLICING	0	-Inf
chr19	1433738	1433826	+	DAZAP1	DAZAP1	H3k36me3	0vs>0	SPLICING	0.00216529742735424	-7.09907648241164
chr19	7150508	7150543	-	INSR	INSR	H3k36me3	0vs>0	SPLICING	0	-Inf
chr19	37008932	37009045	-	ZNF260	ZNF260	H3k36me3	0vs>0	SPLICING	0.0133326022678455	-5.26387750525968
chr19	8369915	8370040	-	CD320	CD320	H3k36me3	1vs<1	SPLICING	0	-Inf
chr19	44531550	44531642	+	ZNF222	ZNF222	H3k36me3	1vs<1	SPLICING	0.0155441459599368	-5.26295818404
chr19	50165205	50165585	-	IRF3	IRF3	H3k36me3	1vs<1	SPLICING	0.00356442329369792	6.88685563283286
chr19	16321171	16321206	+	AP1M1	AP1M1	H3k79me2	0vs>0	SPLICING	3.3548944088431e-05	-12.5380849469115
chr19	53075493	53075621	+	ZNF701	ZNF701	H3k79me2	0vs>0	SPLICING	0.00907410171045393	-5.24581158419492
chr19	1011095	1011194	-	C19orf6	C19orf6	H3k79me2	1vs<1	SPLICING	0	-Inf
chr19	8369915	8370040	-	CD320	CD320	H3k79me2	1vs<1	SPLICING	0	-Inf
chr19	52431148	52431247	+	ZNF613	ZNF613	H3k79me2	1vs<1	SPLICING	7.77129776655536e-05	-11.5410291310559
chr19	373940	374011	-	THEG	THEG	H2az	0vs1	SPLICING	0	-Inf
chr19	8369915	8370040	-	CD320	CD320	H2az	1vs<1	SPLICING	0	-Inf
chr19	47731415	47731703	-	BBC3	BBC3	H2az	1vs<1	SPLICING	0.00056868913995837	-7.80861180128608
chr19	58695288	58695365	+	ZNF274	ZNF274	H2az	1vs<1	SPLICING	0.0165411265987708	-4.46427087774322
chr19	17448326	17448473	+	GTPBP3	GTPBP3	H3k4me1	1vs<1	TSSS	0	-Inf
chr19	45909550	45909607	-	PPP1R13L	PPP1R13L	H3k4me1	1vs<1	TSSS	0	-Inf
chr19	17448326	17448473	+	GTPBP3	GTPBP3	H3k4me2	1vs<1	TSSS	0.00128282840950235	-8.47607929209362
chr19	30205814	30205963	-	C19orf12	C19orf12	H3k4me2	1vs<1	TSSS	0.0225843013511273	-4.64347507575427
chr19	41945787	41945843	-	ATP5SL	ATP5SL	H3k4me2	1vs<1	TSSS	0.0110156434876855	8.32172703855329
chr19	45909550	45909607	-	PPP1R13L	PPP1R13L	H3k4me2	1vs<1	TSSS	0.00183180450875586	-7.98360313855341
chr19	52839498	52839759	+	ZNF610	ZNF610	H3k4me2	1vs<1	TSSS	0.0126338459881351	-6.33413068022201
chr19	53073526	53073583	+	ZNF701	ZNF701	H3k4me2	1vs<1	TSSS	0.0385859493904254	-4.07094131777804
chr19	3506295	3506472	+	FZR1	FZR1	H3k4me3	1vs<1	TSSS	0.0258350729458696	-4.03609554187742
chr19	7895161	7895267	+	EVI5L	EVI5L	H3k4me3	1vs<1	TSSS	0.00958782320751869	-5.0625420521181
chr19	20150152	20150277	-	ZNF682	ZNF682	H3k4me3	1vs<1	TSSS	0.0103239924998913	5.33839247259243
chr19	30205814	30205963	-	C19orf12	C19orf12	H3k4me3	1vs<1	TSSS	0.000171651600609872	-11.1761272906026
chr19	32896655	32896815	+	DPY19L3	DPY19L3	H3k4me3	1vs<1	TSSS	0.000189809564356249	-10.8870005604569
chr19	36705524	36705566	-	ZNF565	ZNF565	H3k4me3	1vs<1	TSSS	0.046200451544494	-3.50965624747456
chr19	42387267	42387356	+	ARHGEF1	ARHGEF1	H3k4me3	1vs<1	TSSS	0.0466993477165335	-3.49775247378879
chr19	44100738	44100895	+	ZNF576	ZNF576	H3k4me3	1vs<1	TSSS	0.0326256791117413	-3.83441031460791
chr19	45909550	45909607	-	PPP1R13L	PPP1R13L	H3k4me3	1vs<1	TSSS	0.00209909044602804	-6.80685989861294
chr19	49314241	49314320	-	BCAT2	BCAT2	H3k4me3	1vs<1	TSSS	0.00302224639589514	-6.33026434261941
chr19	51472746	51472929	-	KLK6	KLK6	H3k4me3	1vs<1	TSSS	0	-Inf
chr19	52839498	52839759	+	ZNF610	ZNF610	H3k4me3	1vs<1	TSSS	0.00771425362783046	-6.26292905959735
chr19	53073526	53073583	+	ZNF701	ZNF701	H3k4me3	1vs<1	TSSS	0.0216913874394419	-4.21979531766621
chr19	55477711	55477835	+	NLRP2	NLRP2	H3k4me3	1vs<1	TSSS	0	-Inf
chr19	7895161	7895267	+	EVI5L	EVI5L	H3k9ac	1vs<1	TSSS	0.000760783176044186	-8.1646769502532
chr19	20150152	20150277	-	ZNF682	ZNF682	H3k9ac	1vs<1	TSSS	0.00995224384561774	5.34054460771101
chr19	30205814	30205963	-	C19orf12	C19orf12	H3k9ac	1vs<1	TSSS	0.00144949074564157	-7.14379024000495
chr19	32896655	32896815	+	DPY19L3	DPY19L3	H3k9ac	1vs<1	TSSS	0.000777293201659508	-8.11815790244773
chr19	36705524	36705566	-	ZNF565	ZNF565	H3k9ac	1vs<1	TSSS	0.016818165836006	-4.46989575528596
chr19	42387267	42387356	+	ARHGEF1	ARHGEF1	H3k9ac	1vs<1	TSSS	0.00226539092619966	-6.61856399907793
chr19	44100738	44100895	+	ZNF576	ZNF576	H3k9ac	1vs<1	TSSS	0.0354395571312101	-3.78645329170183
chr19	49314241	49314320	-	BCAT2	BCAT2	H3k9ac	1vs<1	TSSS	0.000477978357239935	-8.91335425441706
chr19	53073526	53073583	+	ZNF701	ZNF701	H3k9ac	1vs<1	TSSS	0.00222615852173929	-6.64848615040134
chr19	3506295	3506472	+	FZR1	FZR1	H3k27ac	1vs<1	TSSS	0.00858136600126036	-5.0267438539065
chr19	7895161	7895267	+	EVI5L	EVI5L	H3k27ac	1vs<1	TSSS	4.80693776745446e-05	-13.0317079053883
chr19	20150152	20150277	-	ZNF682	ZNF682	H3k27ac	1vs<1	TSSS	0.0227320298414971	4.37164928488555
chr19	30205814	30205963	-	C19orf12	C19orf12	H3k27ac	1vs<1	TSSS	0.000218031156071824	-9.7883818796917
chr19	32896655	32896815	+	DPY19L3	DPY19L3	H3k27ac	1vs<1	TSSS	6.47053407449086e-05	-12.3941711248756
chr19	36705524	36705566	-	ZNF565	ZNF565	H3k27ac	1vs<1	TSSS	0.00892082260038234	-4.9884108320843
chr19	37663529	37663615	-	ZNF585A	ZNF585A	H3k27ac	1vs<1	TSSS	0.0056728826299974	-5.4799632434202
chr19	42387267	42387356	+	ARHGEF1	ARHGEF1	H3k27ac	1vs<1	TSSS	0.000202269602097416	-9.96990604148992
chr19	44100738	44100895	+	ZNF576	ZNF576	H3k27ac	1vs<1	TSSS	0.0156187731764438	-4.42653247023705
chr19	49314241	49314320	-	BCAT2	BCAT2	H3k27ac	1vs<1	TSSS	9.78417749078435e-05	-11.4509706547074
chr19	53073526	53073583	+	ZNF701	ZNF701	H3k27ac	1vs<1	TSSS	0.00426512739262578	-5.80772443629487
chr19	30205814	30205963	-	C19orf12	C19orf12	H3k79me2	1vs<1	TSSS	0.00219526803040529	-7.2194320343297
chr19	49314241	49314320	-	BCAT2	BCAT2	H3k79me2	1vs<1	TSSS	0	-Inf
chr19	17448326	17448473	+	GTPBP3	GTPBP3	H2az	1vs<1	TSSS	0.0150494463854263	-5.01493948511301
chr19	30205814	30205963	-	C19orf12	C19orf12	H2az	1vs<1	TSSS	0.00431584424194429	-6.60104279740496
chr19	32896655	32896815	+	DPY19L3	DPY19L3	H2az	1vs<1	TSSS	0.0140987686762137	-5.09050254243737
chr19	45909550	45909607	-	PPP1R13L	PPP1R13L	H2az	1vs<1	TSSS	0.0140108353462851	-5.10748594354915
chr19	49314241	49314320	-	BCAT2	BCAT2	H2az	1vs<1	TSSS	0.0228868776411364	-4.47094361405097
chr2	99771945	99772007	+	LIPT1	LIPT1	H3k4me1	0vs>0	SPLICING	0	-Inf
chr2	20738931	20739265	-	XLOC_015873	XLOC_015873	H3k4me1	1vs<1	SPLICING	0.00484805019435145	9.00988673695927
chr2	97490795	97490938	+	CNNM3	CNNM3	H3k4me1	1vs<1	SPLICING	0	-Inf
chr2	85921876	85922119	+	GNLY	GNLY	H3k4me2	0vs>0	SPLICING	0	-Inf
chr2	99771945	99772007	+	LIPT1	LIPT1	H3k4me2	0vs>0	SPLICING	0.00202336217818423	-6.82764332851449
chr2	179565847	179565930	-	TTN	TTN	H3k4me2	0vs>0	SPLICING	0.0287090556268787	-4.16922665180403
chr2	179578624	179578902	-	TTN	TTN	H3k4me2	0vs>0	SPLICING	0	-Inf
chr2	106013104	106013154	-	FHL2	FHL2	H3k4me2	1vs<1	SPLICING	0.0248982565696247	4.70528945824522
chr2	85921876	85922119	+	GNLY	GNLY	H3k4me3	0vs>0	SPLICING	0	-Inf
chr2	99771945	99772007	+	LIPT1	LIPT1	H3k4me3	0vs>0	SPLICING	8.00115467472696e-05	-10.3619974633371
chr2	120125140	120125220	+	DBI	DBI	H3k4me3	0vs>0	SPLICING	0.00680445037365333	-5.04471287042747
chr2	27258462	27258596	+	TMEM214	TMEM214	H3k4me3	1vs<1	SPLICING	0	-Inf
chr2	122407877	122407957	+	XLOC_015272	XLOC_015272	H3k4me3	1vs<1	SPLICING	0.000341065484541489	-9.04823136164271
chr2	85921876	85922119	+	GNLY	GNLY	H3k9ac	0vs>0	SPLICING	0	-Inf
chr2	99771945	99772007	+	LIPT1	LIPT1	H3k9ac	0vs>0	SPLICING	0.00116167259004225	-7.15668642863869
chr2	120125140	120125220	+	DBI	DBI	H3k9ac	0vs>0	SPLICING	0.00646528822520537	-5.36098724389092
chr2	179515970	179516047	-	TTN	TTN	H3k9ac	0vs>0	SPLICING	0	-Inf
chr2	179563570	179563641	-	TTN	TTN	H3k9ac	0vs>0	SPLICING	0	-Inf
chr2	179596032	179596310	-	TTN	TTN	H3k9ac	0vs>0	SPLICING	0	-Inf
chr2	27258462	27258596	+	TMEM214	TMEM214	H3k9ac	1vs<1	SPLICING	0	-Inf
chr2	122407877	122407957	+	XLOC_015272	XLOC_015272	H3k9ac	1vs<1	SPLICING	0.0018803638259232	-6.74907331469917
chr2	231738132	231738272	+	ITM2C	ITM2C	H3k9ac	1vs<1	SPLICING	0	-Inf
chr2	44428325	44429184	+	PPM1B	PPM1B	H3k9me1	1vs<1	SPLICING	0	-Inf
chr2	99771945	99772007	+	LIPT1	LIPT1	H3k9me3	0vs>0	SPLICING	0	-Inf
chr2	179596032	179596310	-	TTN	TTN	H3k9me3	0vs>0	SPLICING	0	-Inf
chr2	179596420	179596698	-	TTN	TTN	H3k9me3	0vs>0	SPLICING	0	-Inf
chr2	179596793	179597074	-	TTN	TTN	H3k9me3	0vs>0	SPLICING	0	-Inf
chr2	179599434	179599715	-	TTN	TTN	H3k9me3	0vs>0	SPLICING	0	-Inf
chr2	97490795	97490938	+	CNNM3	CNNM3	H3k9me3	1vs<1	SPLICING	0	-Inf
chr2	99771945	99772007	+	LIPT1	LIPT1	H4k20me1	0vs>0	SPLICING	0	-Inf
chr2	242259618	242259702	+	SEPT2	SEPT2	H4k20me1	0vs>0	SPLICING	0.0267985681008863	-4.34851773544401
chr2	53992514	53992722	-	ASB3	ASB3	H4k20me1	1vs<1	SPLICING	0	-Inf
chr2	97490795	97490938	+	CNNM3	CNNM3	H4k20me1	1vs<1	SPLICING	3.89577264331197e-06	-16.273408698199
chr2	182218935	182219070	+	XLOC_015475	XLOC_015475	H4k20me1	1vs<1	SPLICING	0	-Inf
chr2	85921876	85922119	+	GNLY	GNLY	H3k27ac	0vs>0	SPLICING	0	-Inf
chr2	99771945	99772007	+	LIPT1	LIPT1	H3k27ac	0vs>0	SPLICING	0.000715237111832728	-7.91809175749245
chr2	120125140	120125220	+	DBI	DBI	H3k27ac	0vs>0	SPLICING	0.00375487173956097	-5.96095271850608
chr2	97490795	97490938	+	CNNM3	CNNM3	H3k27ac	1vs<1	SPLICING	0	-Inf
chr2	106013104	106013154	-	FHL2	FHL2	H3k27ac	1vs<1	SPLICING	0.00321890308454411	6.45589744283479
chr2	122407877	122407957	+	XLOC_015272	XLOC_015272	H3k27ac	1vs<1	SPLICING	0.000315620756789604	-9.28537015300541
chr2	179587773	179588051	-	TTN	TTN	H3k27me3	0vs>0	SPLICING	0.0193724655732525	-4.50297892523204
chr2	179590095	179590376	-	TTN	TTN	H3k27me3	0vs>0	SPLICING	0.000585574018174798	-7.77035333900819
chr2	182102978	182103177	+	XLOC_015475	XLOC_015475	H3k27me3	0vs>0	SPLICING	0	-Inf
chr2	86509293	86509365	-	REEP1	REEP1	H3k27me3	1vs<1	SPLICING	0	-Inf
chr2	179603868	179606648	-	TTN	TTN	H3k27me3	1vs<1	SPLICING	0.0234245383145833	4.56639192526059
chr2	242259618	242259702	+	SEPT2	SEPT2	H3k36me3	0vs>0	SPLICING	0.0278796424473401	-4.58140860901183
chr2	32323865	32323960	+	SPAST	SPAST	H3k36me3	1vs<1	SPLICING	1.00446154475612e-05	-16.4704925468669
chr2	53992514	53992722	-	ASB3	ASB3	H3k36me3	1vs<1	SPLICING	0	-Inf
chr2	97490795	97490938	+	CNNM3	CNNM3	H3k36me3	1vs<1	SPLICING	0.00037423793190653	-9.86162067090189
chr2	241535736	241535938	+	CAPN10	CAPN10	H3k36me3	1vs<1	SPLICING	0.0134933661456706	-5.40341258557754
chr2	99771945	99772007	+	LIPT1	LIPT1	H3k79me2	0vs>0	SPLICING	1.32154736944243e-05	-14.2719305425446
chr2	53992514	53992722	-	ASB3	ASB3	H3k79me2	1vs<1	SPLICING	0.00286812686119058	-6.49430261949026
chr2	97490795	97490938	+	CNNM3	CNNM3	H3k79me2	1vs<1	SPLICING	5.21037665911278e-07	-22.697787796838
chr2	122407877	122407957	+	XLOC_015272	XLOC_015272	H3k79me2	1vs<1	SPLICING	0.000191690331762594	-9.93561615418247
chr2	206165254	206165460	+	PARD3B	PARD3B	H3k79me2	1vs<1	SPLICING	0	-Inf
chr2	135743370	135745823	-	YSK4	YSK4	H2az	0vs1	SPLICING	0	-Inf
chr2	99771945	99772007	+	LIPT1	LIPT1	H2az	0vs>0	SPLICING	0.0055315511414161	-5.34992393523453
chr2	179546103	179546177	-	TTN	TTN	H2az	0vs>0	SPLICING	0	-Inf
chr2	179565847	179565930	-	TTN	TTN	H2az	0vs>0	SPLICING	0	-Inf
chr2	179568874	179569134	-	TTN	TTN	H2az	0vs>0	SPLICING	0	-Inf
chr2	179569604	179569693	-	TTN	TTN	H2az	0vs>0	SPLICING	0	-Inf
chr2	179574293	179574583	-	TTN	TTN	H2az	0vs>0	SPLICING	0	-Inf
chr2	179591817	179592098	-	TTN	TTN	H2az	0vs>0	SPLICING	0	-Inf
chr2	179597167	179597445	-	TTN	TTN	H2az	0vs>0	SPLICING	0	-Inf
chr2	97490795	97490938	+	CNNM3	CNNM3	H2az	1vs<1	SPLICING	0	-Inf
chr2	122407877	122407957	+	XLOC_015272	XLOC_015272	H2az	1vs<1	SPLICING	0.00636048009593933	-5.32085148859607
chr2	182218935	182219070	+	XLOC_015475	XLOC_015475	H2az	1vs<1	SPLICING	0	-Inf
chr2	64834109	64834315	+	LOC339807	LOC339807	H3k4me1	1vs<1	TSSS	0	-Inf
chr2	86565147	86565206	-	REEP1	REEP1	H3k4me1	1vs<1	TSSS	0	-Inf
chr2	102608306	102608473	+	IL1R2	IL1R2	H3k4me1	1vs<1	TSSS	0.00343552938160662	-7.18495167243524
chr2	220407947	220408487	-	CHPF	CHPF	H3k4me1	1vs<1	TSSS	0.00286072871561614	-6.74588959763559
chr2	231084589	231084827	-	SP110	SP110	H3k4me1	1vs<1	TSSS	0.00647592722905909	-5.88145906693397
chr2	242842509	242843498	-	XLOC_016772	XLOC_016772	H3k4me1	1vs<1	TSSS	0.0282397881005222	-5.16870282080493
chr2	63275524	63275656	-	LOC100132215	LOC100132215	H3k4me2	1vs<1	TSSS	0.000203855710764138	-13.5921553052952
chr2	86565147	86565206	-	REEP1	REEP1	H3k4me2	1vs<1	TSSS	0.00839385254134357	-5.88348748967747
chr2	102608306	102608473	+	IL1R2	IL1R2	H3k4me2	1vs<1	TSSS	0.00232452652581997	-8.57600150770429
chr2	152955463	152955593	-	CACNB4	CACNB4	H3k4me2	1vs<1	TSSS	0.00318501613617969	7.20436261657587
chr2	203776978	203777047	+	ALS2CR8	ALS2CR8	H3k4me2	1vs<1	TSSS	0.0038478054105308	-6.96008185984683
chr2	208489786	208489973	-	FAM119A	FAM119A	H3k4me2	1vs<1	TSSS	0.000299526137826666	10.7619475779072
chr2	231084589	231084827	-	SP110	SP110	H3k4me2	1vs<1	TSSS	0.00302732895719863	-7.29747845351769
chr2	233877778	233877951	-	NGEF	NGEF	H3k4me2	1vs<1	TSSS	0	-Inf
chr2	25475063	25475180	-	DNMT3A	DNMT3A	H3k4me3	1vs<1	TSSS	0.0317115419232386	3.86768501806154
chr2	26403585	26405362	+	FAM59B	FAM59B	H3k4me3	1vs<1	TSSS	0	-Inf
chr2	27593151	27593324	-	EIF2B4	EIF2B4	H3k4me3	1vs<1	TSSS	0.0440439121686069	-3.55355144667814
chr2	74776147	74776299	+	DOK1	DOK1	H3k4me3	1vs<1	TSSS	0.00258020088355272	-6.54003350738348
chr2	86565147	86565206	-	REEP1	REEP1	H3k4me3	1vs<1	TSSS	0.0011920924854724	-7.6732406808738
chr2	102608306	102608473	+	IL1R2	IL1R2	H3k4me3	1vs<1	TSSS	0.000504879379963847	-10.3567756875629
chr2	152955463	152955593	-	CACNB4	CACNB4	H3k4me3	1vs<1	TSSS	0.00209909044602804	6.80630759214529
chr2	178936253	178937482	-	PDE11A	PDE11A	H3k4me3	1vs<1	TSSS	0.0228141272970478	-4.38067222488654
chr2	179059374	179059401	+	OSBPL6	OSBPL6	H3k4me3	1vs<1	TSSS	0.0317115419232386	-3.86938604866064
chr2	181845112	181845273	+	UBE2E3	UBE2E3	H3k4me3	1vs<1	TSSS	0.00244772760677056	-6.61634520847876
chr2	198364506	198364640	-	HSPD1	HSPD1	H3k4me3	1vs<1	TSSS	0.00150831426016407	-7.32952471560039
chr2	202507332	202507410	-	ALS2CR4	ALS2CR4	H3k4me3	1vs<1	TSSS	0.00189255863595748	-6.99782587499168
chr2	203776978	203777047	+	ALS2CR8	ALS2CR8	H3k4me3	1vs<1	TSSS	0.000288498677786239	-9.98188148409969
chr2	217277473	217277521	+	SMARCAL1	SMARCAL1	H3k4me3	1vs<1	TSSS	0.0344312267006661	-3.78352379315819
chr2	220173940	220174295	-	PTPRN	PTPRN	H3k4me3	1vs<1	TSSS	0.0113744708590277	-4.87658095328826
chr2	231084589	231084827	-	SP110	SP110	H3k4me3	1vs<1	TSSS	0.00358515908374185	-6.15004574798645
chr2	233877778	233877951	-	NGEF	NGEF	H3k4me3	1vs<1	TSSS	0	-Inf
chr2	27593151	27593324	-	EIF2B4	EIF2B4	H3k9ac	1vs<1	TSSS	0.0355524363828963	-3.77962891233501
chr2	74776147	74776299	+	DOK1	DOK1	H3k9ac	1vs<1	TSSS	0.00110165427158497	-7.52446100971028
chr2	86565147	86565206	-	REEP1	REEP1	H3k9ac	1vs<1	TSSS	0	-Inf
chr2	88990273	88991016	-	XLOC_016194	XLOC_016194	H3k9ac	1vs<1	TSSS	0.0308487820445176	-3.92749970837906
chr2	179059374	179059401	+	OSBPL6	OSBPL6	H3k9ac	1vs<1	TSSS	0.000109827029729066	-11.6924164737485
chr2	181845112	181845273	+	UBE2E3	UBE2E3	H3k9ac	1vs<1	TSSS	0.0010415658275791	-7.65533982711456
chr2	198364506	198364640	-	HSPD1	HSPD1	H3k9ac	1vs<1	TSSS	0.000473643143848216	-9.01488936078823
chr2	200322062	200322819	-	SATB2	SATB2	H3k9ac	1vs<1	TSSS	0.0257262107684165	-4.14635046888525
chr2	202507332	202507410	-	ALS2CR4	ALS2CR4	H3k9ac	1vs<1	TSSS	5.77743101514217e-05	-13.1125232661345
chr2	203776978	203777047	+	ALS2CR8	ALS2CR8	H3k9ac	1vs<1	TSSS	3.90519951892237e-06	-18.9612292279316
chr2	208489786	208489973	-	FAM119A	FAM119A	H3k9ac	1vs<1	TSSS	0.00925987014307802	-5.06352083108641
chr2	217277473	217277521	+	SMARCAL1	SMARCAL1	H3k9ac	1vs<1	TSSS	0.0113831461668482	-4.83955714761658
chr2	220407947	220408487	-	CHPF	CHPF	H3k9ac	1vs<1	TSSS	0.0443654006817765	3.58203159285471
chr2	231084589	231084827	-	SP110	SP110	H3k9ac	1vs<1	TSSS	0.0155748531595797	-4.5374057751293
chr2	233877778	233877951	-	NGEF	NGEF	H3k9ac	1vs<1	TSSS	0	-Inf
chr2	86565147	86565206	-	REEP1	REEP1	H4k20me1	1vs<1	TSSS	0	-Inf
chr2	74776147	74776299	+	DOK1	DOK1	H3k27ac	1vs<1	TSSS	0.00504721743384767	-5.63474867415378
chr2	88990273	88991016	-	XLOC_016194	XLOC_016194	H3k27ac	1vs<1	TSSS	0.0237884374341144	-4.08378965641858
chr2	102608306	102608473	+	IL1R2	IL1R2	H3k27ac	1vs<1	TSSS	0	-Inf
chr2	109150857	109151050	+	LIMS1	LIMS1	H3k27ac	1vs<1	TSSS	0.010380890399522	-4.81335902323771
chr2	179059374	179059401	+	OSBPL6	OSBPL6	H3k27ac	1vs<1	TSSS	0	-Inf
chr2	181845112	181845273	+	UBE2E3	UBE2E3	H3k27ac	1vs<1	TSSS	0.000321404503198761	-9.10689709578462
chr2	198364506	198364640	-	HSPD1	HSPD1	H3k27ac	1vs<1	TSSS	0.000102678636135367	-11.1894193321154
chr2	201729287	201729467	-	CLK1	CLK1	H3k27ac	1vs<1	TSSS	0.0462334342335979	-3.53456122433342
chr2	202507332	202507410	-	ALS2CR4	ALS2CR4	H3k27ac	1vs<1	TSSS	9.14292528722123e-05	-11.6086199046976
chr2	203776978	203777047	+	ALS2CR8	ALS2CR8	H3k27ac	1vs<1	TSSS	0.000144717944145994	-10.6054035598579
chr2	208489786	208489973	-	FAM119A	FAM119A	H3k27ac	1vs<1	TSSS	0.000902297972087046	-7.64684695296776
chr2	217277473	217277521	+	SMARCAL1	SMARCAL1	H3k27ac	1vs<1	TSSS	0.0056728826299974	-5.48245897074837
chr2	220407947	220408487	-	CHPF	CHPF	H3k27ac	1vs<1	TSSS	0.00681026153859367	5.25260813982928
chr2	231084589	231084827	-	SP110	SP110	H3k27ac	1vs<1	TSSS	0.0059156991440417	-5.4358617791593
chr2	233877778	233877951	-	NGEF	NGEF	H3k27ac	1vs<1	TSSS	0	-Inf
chr2	88990273	88991016	-	XLOC_016194	XLOC_016194	H3k27me3	1vs<1	TSSS	0	-Inf
chr2	96012768	96012870	+	KCNIP3	KCNIP3	H3k27me3	1vs<1	TSSS	0	-Inf
chr2	220299700	220300087	+	SPEG	SPEG	H3k27me3	1vs<1	TSSS	0.0198477572045711	-4.97041176837828
chr2	220407947	220408487	-	CHPF	CHPF	H3k27me3	1vs<1	TSSS	0.0220331976633898	-4.86159419232919
chr2	86565147	86565206	-	REEP1	REEP1	H3k79me2	1vs<1	TSSS	0	-Inf
chr2	198364506	198364640	-	HSPD1	HSPD1	H3k79me2	1vs<1	TSSS	0.00609528733192604	-6.09943238991488
chr2	231084589	231084827	-	SP110	SP110	H3k79me2	1vs<1	TSSS	9.15997629165938e-05	-12.1056287339101
chr2	39892638	39892780	+	TMEM178	TMEM178	H2az	1vs<1	TSSS	0	-Inf
chr2	55459359	55459449	-	C2orf63	C2orf63	H2az	1vs<1	TSSS	0.0362245669693747	4.19315899171127
chr2	86565147	86565206	-	REEP1	REEP1	H2az	1vs<1	TSSS	0	-Inf
chr2	109150857	109151050	+	LIMS1	LIMS1	H2az	1vs<1	TSSS	0.0164046074895458	-4.87726100233491
chr2	160654643	160654766	-	CD302	CD302	H2az	1vs<1	TSSS	0.0224135360534132	-4.78778298484655
chr2	181845112	181845273	+	UBE2E3	UBE2E3	H2az	1vs<1	TSSS	0.035244575847754	-4.04312718177073
chr2	201729287	201729467	-	CLK1	CLK1	H2az	1vs<1	TSSS	0.0467229451208839	-3.70903294553078
chr2	202507332	202507410	-	ALS2CR4	ALS2CR4	H2az	1vs<1	TSSS	0.0161322312024321	-4.90534682331101
chr2	203776978	203777047	+	ALS2CR8	ALS2CR8	H2az	1vs<1	TSSS	0.0343654956540003	-4.0687902451236
chr2	220173940	220174295	-	PTPRN	PTPRN	H2az	1vs<1	TSSS	0	-Inf
chr2	233877778	233877951	-	NGEF	NGEF	H2az	1vs<1	TSSS	0	-Inf
chr2	242750160	242750369	+	NEU4	NEU4	H2az	1vs<1	TSSS	0	-Inf
chr2	242842509	242843498	-	XLOC_016772	XLOC_016772	H2az	1vs<1	TSSS	0.0352503425166612	-4.55965747569897
chr20	32298361	32298559	-	PXMP4	PXMP4	H3k4me1	0vs>0	SPLICING	0.0154209305861874	-4.98994720075281
chr20	33902491	33902568	-	UQCC	UQCC	H3k4me1	1vs<1	SPLICING	0.00101675961947918	-7.76156626753819
chr20	32298361	32298559	-	PXMP4	PXMP4	H3k4me2	0vs>0	SPLICING	5.79005032685701e-05	-11.5454322663654
chr20	2846045	2846141	+	PTPRA	PTPRA	H3k4me3	1vs<1	SPLICING	0	-Inf
chr20	34802279	34802362	+	EPB41L1	EPB41L1	H3k9ac	1vs<1	SPLICING	0	-Inf
chr20	3095951	3096112	-	FASTKD5	FASTKD5	H3k9me3	1vs<1	SPLICING	0	-Inf
chr20	50782403	50782564	-	ZFP64	ZFP64	H3k9me3	1vs<1	SPLICING	0.0187466002985807	-4.50315601745281
chr20	50782403	50782564	-	ZFP64	ZFP64	H4k20me1	1vs<1	SPLICING	0	-Inf
chr20	31394015	31394133	+	DNMT3B	DNMT3B	H3k27ac	0vs>0	SPLICING	0	-Inf
chr20	33902491	33902568	-	UQCC	UQCC	H3k27ac	1vs<1	SPLICING	0	-Inf
chr20	56191300	56191524	-	ZBP1	ZBP1	H3k36me3	0vs>0	SPLICING	0	-Inf
chr20	50782403	50782564	-	ZFP64	ZFP64	H3k36me3	1vs<1	SPLICING	0.0222330714217274	-4.81531422739278
chr20	2955861	2955887	+	PTPRA	PTPRA	H3k79me2	0vs>0	SPLICING	0	-Inf
chr20	44047492	44047619	+	PIGT	PIGT	H3k79me2	1vs<1	SPLICING	0	-Inf
chr20	44444180	44444384	+	UBE2C	UBE2C	H3k79me2	1vs<1	SPLICING	0.0250613387912809	4.2801423807054
chr20	31394015	31394133	+	DNMT3B	DNMT3B	H2az	0vs>0	SPLICING	9.99185192161668e-05	-9.95286658431372
chr20	34761686	34761876	+	EPB41L1	EPB41L1	H2az	1vs<1	SPLICING	0	-Inf
chr20	34742662	34742818	+	EPB41L1	EPB41L1	H3k4me1	1vs<1	TSSS	0.0386691042295944	-4.22429168231858
chr20	10414756	10414866	-	MKKS	MKKS	H3k4me2	1vs<1	TSSS	0.0443841062997419	-3.96580488864409
chr20	3996084	3996216	-	RNF24	RNF24	H3k4me3	1vs<1	TSSS	0.0216448009662844	-4.23304540177572
chr20	30458120	30458479	-	DUSP15	DUSP15	H3k4me3	1vs<1	TSSS	0.0216602517808422	4.95426059389068
chr20	34742662	34742818	+	EPB41L1	EPB41L1	H3k4me3	1vs<1	TSSS	0.0143834865263355	4.65435305032088
chr20	61569148	61569304	-	DIDO1	DIDO1	H3k4me3	1vs<1	TSSS	0.0392937103618249	-3.64356681624372
chr20	62587613	62587800	-	UCKL1	UCKL1	H3k4me3	1vs<1	TSSS	0.00117435270428331	-7.73918290441335
chr20	62711226	62711324	-	RGS19	RGS19	H3k4me3	1vs<1	TSSS	0.0118300470518552	-4.82663082036453
chr20	3996084	3996216	-	RNF24	RNF24	H3k9ac	1vs<1	TSSS	0.00933572430626267	-5.04189695407971
chr20	30458120	30458479	-	DUSP15	DUSP15	H3k9ac	1vs<1	TSSS	0.038596846975595	5.01957056900657
chr20	61569148	61569304	-	DIDO1	DIDO1	H3k9ac	1vs<1	TSSS	0.00100950408547398	-7.70769870883223
chr20	62587613	62587800	-	UCKL1	UCKL1	H3k9ac	1vs<1	TSSS	0.00163809496374958	-7.00551526678696
chr20	62711226	62711324	-	RGS19	RGS19	H3k9ac	1vs<1	TSSS	0.000879964194531131	-7.93630385091409
chr20	3996084	3996216	-	RNF24	RNF24	H3k27ac	1vs<1	TSSS	0.00114566695128071	-7.26819173645758
chr20	61569148	61569304	-	DIDO1	DIDO1	H3k27ac	1vs<1	TSSS	0.00113607394080421	-7.29172114077756
chr20	62587613	62587800	-	UCKL1	UCKL1	H3k27ac	1vs<1	TSSS	0.00243748815138306	-6.39453304920437
chr20	62711226	62711324	-	RGS19	RGS19	H3k27ac	1vs<1	TSSS	0	-Inf
chr20	34742662	34742818	+	EPB41L1	EPB41L1	H3k27me3	1vs<1	TSSS	0	-Inf
chr20	3996084	3996216	-	RNF24	RNF24	H2az	1vs<1	TSSS	0.0467229451208839	-3.71299022538807
chr20	62587613	62587800	-	UCKL1	UCKL1	H2az	1vs<1	TSSS	0.0417827447719176	-3.8310136608461
chr20	62711226	62711324	-	RGS19	RGS19	H2az	1vs<1	TSSS	0.00130281431805547	-8.57270980394022
chr21	44883220	44883369	-	C21orf125	C21orf125	H3k4me1	0vs>0	SPLICING	0	-Inf
chr21	47602538	47603688	-	C21orf56	C21orf56	H3k4me1	0vs>0	SPLICING	0.0484592769265963	4.02229858642916
chr21	37849672	37849861	-	CLDN14	CLDN14	H3k4me2	0vs>0	SPLICING	0	-Inf
chr21	37849672	37849861	-	CLDN14	CLDN14	H3k4me3	0vs>0	SPLICING	0	-Inf
chr21	45724158	45724338	+	PFKL	PFKL	H3k4me3	0vs>0	SPLICING	0.00570650542553016	-5.27158946228502
chr21	37849672	37849861	-	CLDN14	CLDN14	H3k9ac	0vs>0	SPLICING	0	-Inf
chr21	45724158	45724338	+	PFKL	PFKL	H3k9ac	0vs>0	SPLICING	0.000332157177687716	-8.68891044933497
chr21	39817327	39817544	-	ERG	ERG	H3k9me1	1vs<1	SPLICING	0	-Inf
chr21	45725683	45725818	+	PFKL	PFKL	H4k20me1	0vs>0	SPLICING	4.88484314682544e-05	-10.9866715960923
chr21	47602538	47603688	-	C21orf56	C21orf56	H4k20me1	0vs>0	SPLICING	0.000229031747827041	-8.88982912717214
chr21	47904670	47904741	+	DIP2A	DIP2A	H4k20me1	1vs<1	SPLICING	0	-Inf
chr21	47910513	47910632	+	DIP2A	DIP2A	H4k20me1	1vs<1	SPLICING	0.0252240509277875	-4.3945224573242
chr21	44883220	44883369	-	C21orf125	C21orf125	H3k27ac	0vs>0	SPLICING	0.00101920061274394	-8.3266665057569
chr21	45725683	45725818	+	PFKL	PFKL	H3k27ac	0vs>0	SPLICING	0.000146816814001365	-9.97685479565776
chr21	45725683	45725818	+	PFKL	PFKL	H3k36me3	0vs>0	SPLICING	0	-Inf
chr21	47910513	47910632	+	DIP2A	DIP2A	H3k36me3	1vs<1	SPLICING	0.0166628710433354	-5.18397970887104
chr21	47910513	47910632	+	DIP2A	DIP2A	H3k79me2	1vs<1	SPLICING	0.0173145975966491	-4.68542173565003
chr21	43298804	43298969	-	PRDM15	PRDM15	H2az	0vs>0	SPLICING	0.0242428430287158	4.31747516549342
chr21	44496335	44496472	-	CBS	CBS	H3k4me1	1vs<1	TSSS	0.00897726355209382	-5.49014982729404
chr21	45705763	45706021	+	AIRE	AIRE	H3k4me2	1vs<1	TSSS	0.0349171386196433	-5.32444350849539
chr21	44496335	44496472	-	CBS	CBS	H3k4me3	1vs<1	TSSS	0.00984844868938025	5.02633395617823
chr21	44496335	44496472	-	CBS	CBS	H3k27me3	1vs<1	TSSS	0.00152336627148015	-7.62670008407947
chr21	43816051	43816200	-	TMPRSS3	TMPRSS3	H2az	1vs<1	TSSS	0.018816420493423	-5.44064036338056
chr21	44496335	44496472	-	CBS	CBS	H2az	1vs<1	TSSS	0.0164046074895458	4.86568778240246
chr21	45705763	45706021	+	AIRE	AIRE	H2az	1vs<1	TSSS	0.0152140214468873	-6.73799575756511
chr22	26875231	26875551	-	HPS4	HPS4	H3k4me2	0vs>0	SPLICING	0.0130431	-13.1406
chr22	40677123	40677293	+	TNRC6B	TNRC6B	H3k4me1	0vs>0	SPLICING	0.00150971700530806	-7.32345134241384
chr22	30823158	30823390	+	MTFP1	MTFP1	H3k4me1	1vs<1	SPLICING	0.000286068653978504	-9.62494423672108
chr22	20749623	20749708	+	ZNF74	ZNF74	H3k4me2	1vs<1	SPLICING	0.0336084389344069	-4.43745469177817
chr22	30823158	30823390	+	MTFP1	MTFP1	H3k4me2	1vs<1	SPLICING	0	-Inf
chr22	27063148	27063273	+	MIAT	MIAT	H3k4me3	0vs>0	SPLICING	0	-Inf
chr22	50315945	50316091	+	CRELD2	CRELD2	H3k4me3	0vs>0	SPLICING	0	-Inf
chr22	30823158	30823390	+	MTFP1	MTFP1	H3k4me3	1vs<1	SPLICING	0	-Inf
chr22	50315945	50316091	+	CRELD2	CRELD2	H3k9ac	0vs>0	SPLICING	0	-Inf
chr22	30823158	30823390	+	MTFP1	MTFP1	H3k9ac	1vs<1	SPLICING	0	-Inf
chr22	50613861	50613911	+	PANX2	PANX2	H3k9me3	0vs>0	SPLICING	0	-Inf
chr22	30823158	30823390	+	MTFP1	MTFP1	H3k9me3	1vs<1	SPLICING	0	-Inf
chr22	50315945	50316091	+	CRELD2	CRELD2	H4k20me1	0vs>0	SPLICING	0	-Inf
chr22	21947150	21947245	+	UBE2L3	UBE2L3	H4k20me1	1vs<1	SPLICING	0.00362167921630191	-6.21103672371511
chr22	40677123	40677293	+	TNRC6B	TNRC6B	H3k27ac	0vs>0	SPLICING	0.00258937463538038	-6.41383342367098
chr22	30823158	30823390	+	MTFP1	MTFP1	H3k27ac	1vs<1	SPLICING	0	-Inf
chr22	40677123	40677293	+	TNRC6B	TNRC6B	H3k27me3	0vs>0	SPLICING	0	-Inf
chr22	21947150	21947245	+	UBE2L3	UBE2L3	H3k27me3	1vs<1	SPLICING	0	-Inf
chr22	50315945	50316091	+	CRELD2	CRELD2	H3k36me3	0vs>0	SPLICING	0.000266516100011536	-9.55578161746355
chr22	30035079	30035201	+	NF2	NF2	H3k36me3	1vs<1	SPLICING	0.00302321700957872	-7.11892352374868
chr22	30823158	30823390	+	MTFP1	MTFP1	H3k36me3	1vs<1	SPLICING	0	-Inf
chr22	20749623	20749708	+	ZNF74	ZNF74	H3k79me2	1vs<1	SPLICING	6.42558649134546e-05	-11.9225550523451
chr22	30823158	30823390	+	MTFP1	MTFP1	H3k79me2	1vs<1	SPLICING	4.22167808980971e-06	-17.237712714475
chr22	30823158	30823390	+	MTFP1	MTFP1	H2az	1vs<1	SPLICING	0	-Inf
chr22	36236239	36236630	-	RBFOX2	RBFOX2	H3k4me1	1vs<1	TSSS	0.00897726355209382	-5.92580373782194
chr22	45405765	45405809	-	PHF21B	PHF21B	H3k4me2	1vs<1	TSSS	0	-Inf
chr22	50523784	50524358	-	MLC1	MLC1	H3k4me2	1vs<1	TSSS	0.0349171386196433	6.40652300213798
chr22	19165900	19166034	-	SLC25A1	SLC25A1	H3k4me3	1vs<1	TSSS	0.000633104882799563	-8.66257348541481
chr22	21212858	21213070	-	PI4KA	PI4KA	H3k4me3	1vs<1	TSSS	0.0211070100287404	-4.2619895026588
chr22	31885680	31885874	-	EIF4ENIF1	EIF4ENIF1	H3k4me3	1vs<1	TSSS	0.00517124324104567	5.66388250887986
chr22	19165900	19166034	-	SLC25A1	SLC25A1	H3k9ac	1vs<1	TSSS	0.000659430142696641	-8.35071842817401
chr22	21212858	21213070	-	PI4KA	PI4KA	H3k9ac	1vs<1	TSSS	0.0428400629695738	-3.61034953700222
chr22	19165900	19166034	-	SLC25A1	SLC25A1	H4k20me1	1vs<1	TSSS	0	-Inf
chr22	19165900	19166034	-	SLC25A1	SLC25A1	H3k27ac	1vs<1	TSSS	0.000218031156071824	-9.76769185831761
chr22	21212858	21213070	-	PI4KA	PI4KA	H3k27ac	1vs<1	TSSS	0.00937079519326187	-4.9349581908992
chr22	32150069	32150150	+	DEPDC5	DEPDC5	H3k27ac	1vs<1	TSSS	0.0461035510895009	3.58718702654899
chr22	38668890	38669040	-	TMEM184B	TMEM184B	H3k27ac	1vs<1	TSSS	0.0227320298414971	-4.13153978894244
chr22	36236239	36236630	-	RBFOX2	RBFOX2	H3k27me3	1vs<1	TSSS	0	-Inf
chr22	19165900	19166034	-	SLC25A1	SLC25A1	H3k79me2	1vs<1	TSSS	9.15997629165938e-05	-12.0439447734511
chr22	21212858	21213070	-	PI4KA	PI4KA	H3k79me2	1vs<1	TSSS	0.00507942542859101	-6.30762554206958
chr22	19165900	19166034	-	SLC25A1	SLC25A1	H2az	1vs<1	TSSS	0.01730835748493	-4.75306199557188
chr22	43411027	43411184	-	PACSIN2	PACSIN2	H2az	1vs<1	TSSS	0.0140108353462851	-5.1082998673662
chr22	50523784	50524358	-	MLC1	MLC1	H2az	1vs<1	TSSS	0.0472473834605481	5.30240842776289
chr3	51706357	51706408	+	TEX264	TEX264	H3k4me1	0vs>0	SPLICING	0.00410737001891016	-6.25872168806797
chr3	53077152	53077270	-	SFMBT1	SFMBT1	H3k4me1	0vs>0	SPLICING	0	-Inf
chr3	58468983	58469079	+	XLOC_018963	XLOC_018963	H3k4me1	0vs>0	SPLICING	0	-Inf
chr3	138329446	138329879	+	FAIM	FAIM	H3k4me1	0vs>0	SPLICING	0	-Inf
chr3	33109722	33109782	-	GLB1	GLB1	H3k4me1	1vs<1	SPLICING	0	-Inf
chr3	37998602	37998634	+	CTDSPL	CTDSPL	H3k4me1	1vs<1	SPLICING	0	-Inf
chr3	51706357	51706408	+	TEX264	TEX264	H3k4me2	0vs>0	SPLICING	0.0287090556268787	-4.20170241124566
chr3	53077152	53077270	-	SFMBT1	SFMBT1	H3k4me2	0vs>0	SPLICING	0	-Inf
chr3	58468983	58469079	+	XLOC_018963	XLOC_018963	H3k4me2	0vs>0	SPLICING	0	-Inf
chr3	138329446	138329879	+	FAIM	FAIM	H3k4me2	0vs>0	SPLICING	0	-Inf
chr3	33099581	33099761	-	GLB1	GLB1	H3k4me2	1vs<1	SPLICING	0.005995475297916	-6.03674268284992
chr3	101117705	101117899	-	SENP7	SENP7	H3k4me2	1vs<1	SPLICING	0	-Inf
chr3	112711873	112711971	+	GTPBP8	GTPBP8	H3k4me2	1vs<1	SPLICING	0.00041348166554152	-8.98669603661539
chr3	51706357	51706408	+	TEX264	TEX264	H3k4me3	0vs>0	SPLICING	0.00215982147532828	-6.35473515292929
chr3	123881057	123881294	+	KALRN	KALRN	H3k4me3	0vs>0	SPLICING	0	-Inf
chr3	138329446	138329879	+	FAIM	FAIM	H3k4me3	0vs>0	SPLICING	0	-Inf
chr3	184056175	184056317	+	FAM131A	FAM131A	H3k4me3	0vs>0	SPLICING	4.55152178906646e-05	-11.2436552562569
chr3	69129263	69129304	-	UBA3	UBA3	H3k4me3	1vs<1	SPLICING	0.0106863691389301	-5.1852444666473
chr3	47284541	47284735	-	KIF9	KIF9	H3k9ac	0vs>0	SPLICING	0	-Inf
chr3	51706357	51706408	+	TEX264	TEX264	H3k9ac	0vs>0	SPLICING	0	-Inf
chr3	58468983	58469079	+	XLOC_018963	XLOC_018963	H3k9ac	0vs>0	SPLICING	0	-Inf
chr3	184034501	184034521	+	EIF4G1	EIF4G1	H3k9ac	0vs>0	SPLICING	0	-Inf
chr3	69129263	69129304	-	UBA3	UBA3	H3k9ac	1vs<1	SPLICING	0.037453627981415	-3.93172150461072
chr3	44756083	44756180	+	ZNF502	ZNF502	H3k9me3	1vs<1	SPLICING	0	-Inf
chr3	123881057	123881294	+	KALRN	KALRN	H4k20me1	0vs>0	SPLICING	0	-Inf
chr3	33099581	33099761	-	GLB1	GLB1	H4k20me1	1vs<1	SPLICING	0	-Inf
chr3	49785251	49785601	-	IP6K1	IP6K1	H4k20me1	1vs<1	SPLICING	0.0251238638116209	-4.41645201040396
chr3	51708287	51708578	+	TEX264	TEX264	H4k20me1	1vs<1	SPLICING	0.0420960562259002	-4.00168452110532
chr3	101117705	101117899	-	SENP7	SENP7	H4k20me1	1vs<1	SPLICING	0	-Inf
chr3	112711873	112711971	+	GTPBP8	GTPBP8	H4k20me1	1vs<1	SPLICING	0	-Inf
chr3	50603437	50603525	-	C3orf18	C3orf18	H3k27ac	0vs>0	SPLICING	0	-Inf
chr3	51706357	51706408	+	TEX264	TEX264	H3k27ac	0vs>0	SPLICING	0	-Inf
chr3	58468983	58469079	+	XLOC_018963	XLOC_018963	H3k27ac	0vs>0	SPLICING	0	-Inf
chr3	138329446	138329879	+	FAIM	FAIM	H3k27ac	0vs>0	SPLICING	0	-Inf
chr3	69129263	69129304	-	UBA3	UBA3	H3k27ac	1vs<1	SPLICING	0.00496650831191699	-5.97368667819649
chr3	140953058	140953160	+	ACPL2	ACPL2	H3k27me3	0vs>0	SPLICING	0	-Inf
chr3	9874788	9874929	+	ARPC4	ARPC4	H3k36me3	0vs>0	SPLICING	0.0274658871315443	-4.62285717787955
chr3	138329446	138329879	+	FAIM	FAIM	H3k36me3	0vs>0	SPLICING	1.8187520628697e-05	-13.8298661172798
chr3	33099581	33099761	-	GLB1	GLB1	H3k36me3	1vs<1	SPLICING	0.0213748345401487	-4.91221058603994
chr3	33109722	33109782	-	GLB1	GLB1	H3k36me3	1vs<1	SPLICING	0.0213748345401487	-4.90312693103575
chr3	49508398	49508482	+	DAG1	DAG1	H3k79me2	0vs>0	SPLICING	0.027854813298513	-4.19326237479723
chr3	51706357	51706408	+	TEX264	TEX264	H3k79me2	0vs>0	SPLICING	0.00319762961556358	-6.43732756120475
chr3	53077152	53077270	-	SFMBT1	SFMBT1	H3k79me2	0vs>0	SPLICING	0.00673700735925002	-5.52330120079071
chr3	58468983	58469079	+	XLOC_018963	XLOC_018963	H3k79me2	0vs>0	SPLICING	0	-Inf
chr3	138329446	138329879	+	FAIM	FAIM	H3k79me2	0vs>0	SPLICING	0.000424914851227633	-8.73529086588297
chr3	184056175	184056317	+	FAM131A	FAM131A	H3k79me2	0vs>0	SPLICING	0.00536443031217707	-5.81455735334967
chr3	69129263	69129304	-	UBA3	UBA3	H3k79me2	1vs<1	SPLICING	0.0141712396028756	-4.91677122285166
chr3	152150506	152150709	+	MBNL1	MBNL1	H3k79me2	1vs<1	SPLICING	0.0166338588219997	4.75258389923545
chr3	51706357	51706408	+	TEX264	TEX264	H2az	0vs>0	SPLICING	0	-Inf
chr3	138329446	138329879	+	FAIM	FAIM	H2az	0vs>0	SPLICING	0	-Inf
chr3	37998602	37998634	+	CTDSPL	CTDSPL	H2az	1vs<1	SPLICING	0	-Inf
chr3	101117705	101117899	-	SENP7	SENP7	H2az	1vs<1	SPLICING	0	-Inf
chr3	127251642	127251756	-	XLOC_019968	XLOC_019968	H2az	1vs<1	SPLICING	0	-Inf
chr3	49055833	49056017	-	DALRD3	DALRD3	H3k4me1	1vs<1	TSSS	0.000157033608554886	-10.9008824681292
chr3	121902530	121902659	+	CASR	CASR	H3k4me1	1vs<1	TSSS	0	-Inf
chr3	147123160	147123307	-	ZIC4	ZIC4	H3k4me1	1vs<1	TSSS	0	-Inf
chr3	160823023	160823160	-	B3GALNT1	B3GALNT1	H3k4me1	1vs<1	TSSS	0.0456379524141778	-4.65491512524311
chr3	193924037	193924096	-	XLOC_020230	XLOC_020230	H3k4me1	1vs<1	TSSS	0	-Inf
chr3	197476624	197476945	+	FYTTD1	FYTTD1	H3k4me1	1vs<1	TSSS	0.00143813290826205	-7.53336932957272
chr3	197686716	197686886	-	IQCG	IQCG	H3k4me1	1vs<1	TSSS	0.00021332382890695	-10.3983452076778
chr3	38070997	38071154	-	PLCD1	PLCD1	H3k4me2	1vs<1	TSSS	0.0192759483182918	4.82516155877499
chr3	46506315	46506598	-	LTF	LTF	H3k4me2	1vs<1	TSSS	0.0110156434876855	-5.95064245390617
chr3	48471417	48471460	-	PLXNB1	PLXNB1	H3k4me2	1vs<1	TSSS	0.0207615238317321	-4.74440135658382
chr3	49055833	49056017	-	DALRD3	DALRD3	H3k4me2	1vs<1	TSSS	0.0110156434876855	-5.50877172292728
chr3	57113254	57113336	-	ARHGEF3	ARHGEF3	H3k4me2	1vs<1	TSSS	0.0315408859582887	-4.31252343449273
chr3	79067557	79068609	-	ROBO1	ROBO1	H3k4me2	1vs<1	TSSS	1.89367393127259e-06	21.6215927602636
chr3	111717586	111717961	+	TAGLN3	TAGLN3	H3k4me2	1vs<1	TSSS	0.00568935106381238	9.68953311828662
chr3	127541927	127542051	-	MGLL	MGLL	H3k4me2	1vs<1	TSSS	0.00568935106381238	-7.08116751693313
chr3	128211742	128212030	-	GATA2	GATA2	H3k4me2	1vs<1	TSSS	0.0488574485051869	3.84628921063862
chr3	128997684	128997748	+	C3orf37	C3orf37	H3k4me2	1vs<1	TSSS	0.0287402632756478	-4.38993028611856
chr3	132379140	132379542	+	UBA5	UBA5	H3k4me2	1vs<1	TSSS	0.0282904364862152	4.4185554207246
chr3	138327542	138327779	+	FAIM	FAIM	H3k4me2	1vs<1	TSSS	0.0225843013511273	-4.64313883994392
chr3	147123160	147123307	-	ZIC4	ZIC4	H3k4me2	1vs<1	TSSS	0	-Inf
chr3	193924037	193924096	-	XLOC_020230	XLOC_020230	H3k4me2	1vs<1	TSSS	0	-Inf
chr3	197686716	197686886	-	IQCG	IQCG	H3k4me2	1vs<1	TSSS	0.000299526137826666	-10.7031571399597
chr3	38070997	38071154	-	PLCD1	PLCD1	H3k4me3	1vs<1	TSSS	0.00269641236573037	6.47321156569683
chr3	46506315	46506598	-	LTF	LTF	H3k4me3	1vs<1	TSSS	0	-Inf
chr3	48471417	48471460	-	PLXNB1	PLXNB1	H3k4me3	1vs<1	TSSS	0.001454559020807	-7.42273054866607
chr3	50604894	50605223	-	C3orf18	C3orf18	H3k4me3	1vs<1	TSSS	0.00258516893738769	-6.52558827806443
chr3	52567522	52567793	-	NT5DC2	NT5DC2	H3k4me3	1vs<1	TSSS	0.00586368223668917	-5.52452666039853
chr3	53079832	53080089	-	SFMBT1	SFMBT1	H3k4me3	1vs<1	TSSS	0.00150156324853776	-7.35224993064725
chr3	57113254	57113336	-	ARHGEF3	ARHGEF3	H3k4me3	1vs<1	TSSS	0.000189809564356249	-10.8507916003304
chr3	79067557	79068609	-	ROBO1	ROBO1	H3k4me3	1vs<1	TSSS	7.35752861503793e-06	17.3622768653106
chr3	111717586	111717961	+	TAGLN3	TAGLN3	H3k4me3	1vs<1	TSSS	0.00244772760677056	10.0636348026386
chr3	114866066	114866127	-	ZBTB20	ZBTB20	H3k4me3	1vs<1	TSSS	0.0345145574220476	3.77379139083665
chr3	123603053	123603149	-	MYLK	MYLK	H3k4me3	1vs<1	TSSS	0.0297970236287869	3.92496630724311
chr3	125802936	125803134	-	SLC41A3	SLC41A3	H3k4me3	1vs<1	TSSS	0.0215343100573855	4.24199960813473
chr3	127541927	127542051	-	MGLL	MGLL	H3k4me3	1vs<1	TSSS	0.00169835201899944	-7.9079310955449
chr3	128211742	128212030	-	GATA2	GATA2	H3k4me3	1vs<1	TSSS	0.0388016905558516	3.66006066006975
chr3	128997684	128997748	+	C3orf37	C3orf37	H3k4me3	1vs<1	TSSS	0.00155501604208287	-7.28027987772322
chr3	160823023	160823160	-	B3GALNT1	B3GALNT1	H3k4me3	1vs<1	TSSS	0.0371959697003727	-4.15208543501693
chr3	184053717	184053911	+	FAM131A	FAM131A	H3k4me3	1vs<1	TSSS	0.0118300470518552	-4.82557973321125
chr3	197463526	197463773	-	KIAA0226	KIAA0226	H3k4me3	1vs<1	TSSS	0.0150148090504072	-4.59060885860117
chr3	197686716	197686886	-	IQCG	IQCG	H3k4me3	1vs<1	TSSS	0.00052940601935379	-8.95400966618964
chr3	48471417	48471460	-	PLXNB1	PLXNB1	H3k9ac	1vs<1	TSSS	0.000178652610269595	-10.8318524133935
chr3	50604894	50605223	-	C3orf18	C3orf18	H3k9ac	1vs<1	TSSS	0.0113831461668482	-4.83437412761588
chr3	52567522	52567793	-	NT5DC2	NT5DC2	H3k9ac	1vs<1	TSSS	0.0104183179621406	-4.92549804314242
chr3	53079832	53080089	-	SFMBT1	SFMBT1	H3k9ac	1vs<1	TSSS	7.14641063941089e-07	-23.7195577390042
chr3	57113254	57113336	-	ARHGEF3	ARHGEF3	H3k9ac	1vs<1	TSSS	8.37201175790166e-05	-12.2556482470784
chr3	79067557	79068609	-	ROBO1	ROBO1	H3k9ac	1vs<1	TSSS	0.000297040100955075	9.74479081337464
chr3	111717586	111717961	+	TAGLN3	TAGLN3	H3k9ac	1vs<1	TSSS	0.0395443227953522	4.53474251576053
chr3	127541927	127542051	-	MGLL	MGLL	H3k9ac	1vs<1	TSSS	0.0316625387940519	-4.10950229317458
chr3	128997684	128997748	+	C3orf37	C3orf37	H3k9ac	1vs<1	TSSS	0.000215936651175057	-10.3801158252841
chr3	132379140	132379542	+	UBA5	UBA5	H3k9ac	1vs<1	TSSS	0.0236401442359187	4.17691331268628
chr3	193924037	193924096	-	XLOC_020230	XLOC_020230	H3k9ac	1vs<1	TSSS	0	-Inf
chr3	197463526	197463773	-	KIAA0226	KIAA0226	H3k9ac	1vs<1	TSSS	0.00316235420551719	-6.24359562793619
chr3	197686716	197686886	-	IQCG	IQCG	H3k9ac	1vs<1	TSSS	0.00766220369712435	-5.24118135431078
chr3	48471417	48471460	-	PLXNB1	PLXNB1	H4k20me1	1vs<1	TSSS	0	-Inf
chr3	48471417	48471460	-	PLXNB1	PLXNB1	H3k27ac	1vs<1	TSSS	9.14292528722123e-05	-11.6813801369555
chr3	50604894	50605223	-	C3orf18	C3orf18	H3k27ac	1vs<1	TSSS	0.000239493353384112	-9.55791517606604
chr3	52567522	52567793	-	NT5DC2	NT5DC2	H3k27ac	1vs<1	TSSS	0.0114226897617906	-4.7201193853117
chr3	53079832	53080089	-	SFMBT1	SFMBT1	H3k27ac	1vs<1	TSSS	2.95756738971814e-06	-19.1443490619868
chr3	57113254	57113336	-	ARHGEF3	ARHGEF3	H3k27ac	1vs<1	TSSS	0	-Inf
chr3	69788586	69788852	+	MITF	MITF	H3k27ac	1vs<1	TSSS	0.0428063078560906	3.61706947416887
chr3	79067557	79068609	-	ROBO1	ROBO1	H3k27ac	1vs<1	TSSS	0.00426512739262578	5.80059565129035
chr3	128997684	128997748	+	C3orf37	C3orf37	H3k27ac	1vs<1	TSSS	0.000222595334498473	-9.71047254881944
chr3	160823023	160823160	-	B3GALNT1	B3GALNT1	H3k27ac	1vs<1	TSSS	0.00948655916535679	-5.77393217248321
chr3	183967445	183967678	+	ECE2	ECE2	H3k27ac	1vs<1	TSSS	0.00339453454127252	6.05586494785271
chr3	184053717	184053911	+	FAM131A	FAM131A	H3k27ac	1vs<1	TSSS	0.0227812998408673	-4.12042607081839
chr3	186648315	186648623	+	ST6GAL1	ST6GAL1	H3k27ac	1vs<1	TSSS	0.0299067064150157	-4.11557681698292
chr3	193924037	193924096	-	XLOC_020230	XLOC_020230	H3k27ac	1vs<1	TSSS	0	-Inf
chr3	197463526	197463773	-	KIAA0226	KIAA0226	H3k27ac	1vs<1	TSSS	0.00128131401402985	-7.11089837288665
chr3	197686716	197686886	-	IQCG	IQCG	H3k27ac	1vs<1	TSSS	0.00261502210621704	-6.30587713084564
chr3	148415658	148415914	+	AGTR1	AGTR1	H3k27me3	1vs<1	TSSS	0	-Inf
chr3	170136653	170137080	+	CLDN11	CLDN11	H3k27me3	1vs<1	TSSS	0.00454017232871209	7.03497201776737
chr3	129599152	129599402	-	TMCC1	TMCC1	H3k36me3	1vs<1	TSSS	0.0106374383069911	-5.24072852878464
chr3	50604894	50605223	-	C3orf18	C3orf18	H3k79me2	1vs<1	TSSS	0	-Inf
chr3	129599152	129599402	-	TMCC1	TMCC1	H3k79me2	1vs<1	TSSS	0.00924655652289602	-5.62969275324025
chr3	197463526	197463773	-	KIAA0226	KIAA0226	H3k79me2	1vs<1	TSSS	0.0324500851260618	-4.38069657737456
chr3	197686716	197686886	-	IQCG	IQCG	H3k79me2	1vs<1	TSSS	0.000476455240229841	-9.12553964225064
chr3	15900884	15901053	-	ANKRD28	ANKRD28	H2az	1vs<1	TSSS	0.00310400556807462	7.16966519212167
chr3	46506315	46506598	-	LTF	LTF	H2az	1vs<1	TSSS	0.00360380043837682	-7.64167714132077
chr3	48471417	48471460	-	PLXNB1	PLXNB1	H2az	1vs<1	TSSS	0.00182806828341873	-8.07955804296259
chr3	49055833	49056017	-	DALRD3	DALRD3	H2az	1vs<1	TSSS	0.016923015741688	-4.79833516053649
chr3	52567522	52567793	-	NT5DC2	NT5DC2	H2az	1vs<1	TSSS	0.016653906771559	-4.82038515561469
chr3	57113254	57113336	-	ARHGEF3	ARHGEF3	H2az	1vs<1	TSSS	0.0144763954089571	-5.05754746726704
chr3	58457376	58457445	+	XLOC_018963	XLOC_018963	H2az	1vs<1	TSSS	0	-Inf
chr3	79067557	79068609	-	ROBO1	ROBO1	H2az	1vs<1	TSSS	0.000996333030999293	8.95215675371118
chr3	121902530	121902659	+	CASR	CASR	H2az	1vs<1	TSSS	0	-Inf
chr3	127541927	127542051	-	MGLL	MGLL	H2az	1vs<1	TSSS	0.0366287670031976	-4.17477746974032
chr3	136581050	136581161	+	NCK1	NCK1	H2az	1vs<1	TSSS	0.00310400556807462	-7.88628372061835
chr3	183967445	183967678	+	ECE2	ECE2	H2az	1vs<1	TSSS	0.00196241920768197	7.86509063708564
chr3	184053717	184053911	+	FAM131A	FAM131A	H2az	1vs<1	TSSS	0.0108521461347814	-5.49484976956457
chr3	193924037	193924096	-	XLOC_020230	XLOC_020230	H2az	1vs<1	TSSS	0.0434724741489704	-5.47715643234885
chr3	197686716	197686886	-	IQCG	IQCG	H2az	1vs<1	TSSS	0.00035168467921639	-10.6111120418431
chr4	582422	582641	+	XLOC_020279	XLOC_020279	H3k4me2	0vs1	SPLICING	0	-Inf
chr4	15480847	15480952	+	CC2D2A	CC2D2A	H3k4me2	0vs>0	SPLICING	0.000165881668933273	9.87294355590327
chr4	114274201	114280455	+	ANK2	ANK2	H3k4me2	0vs>0	SPLICING	0.0140467796918481	-5.10265721539945
chr4	159091399	159091499	-	FAM198B	FAM198B	H3k4me2	0vs>0	SPLICING	0.00256202666876767	-7.19548434096237
chr4	107183255	107183369	-	TBCK	TBCK	H3k4me2	1vs<1	SPLICING	0	-Inf
chr4	169798874	169799545	+	PALLD	PALLD	H3k4me2	1vs<1	SPLICING	0.0456993434884142	-4.33867631575259
chr4	582422	582641	+	XLOC_020279	XLOC_020279	H3k4me3	0vs1	SPLICING	0	-Inf
chr4	15480847	15480952	+	CC2D2A	CC2D2A	H3k4me3	0vs>0	SPLICING	0.000532745749169787	7.95496553453704
chr4	114274201	114280455	+	ANK2	ANK2	H3k4me3	0vs>0	SPLICING	0.00454585287220116	-6.0471614589314
chr4	159091399	159091499	-	FAM198B	FAM198B	H3k4me3	0vs>0	SPLICING	0.00747997330774051	-5.27410556436716
chr4	169798874	169799545	+	PALLD	PALLD	H3k4me3	1vs<1	SPLICING	0.00662989566051438	-6.14457772673533
chr4	15480847	15480952	+	CC2D2A	CC2D2A	H3k9ac	0vs>0	SPLICING	0.00198967080976546	6.58315273617845
chr4	169798874	169799545	+	PALLD	PALLD	H3k9ac	1vs<1	SPLICING	0.0256924541563701	-4.49771528994916
chr4	1316169	1316291	+	MAEA	MAEA	H3k9me3	1vs<1	SPLICING	0	-Inf
chr4	99807605	99807697	-	EIF4E	EIF4E	H4k20me1	0vs>0	SPLICING	0	-Inf
chr4	582422	582641	+	XLOC_020279	XLOC_020279	H3k27ac	0vs1	SPLICING	0	-Inf
chr4	15480847	15480952	+	CC2D2A	CC2D2A	H3k27ac	0vs>0	SPLICING	0.0123661653723417	4.79211952180356
chr4	99807605	99807697	-	EIF4E	EIF4E	H3k36me3	0vs>0	SPLICING	0	-Inf
chr4	166149959	166150065	+	KLHL2	KLHL2	H3k36me3	1vs<1	SPLICING	0	-Inf
chr4	159091399	159091499	-	FAM198B	FAM198B	H3k79me2	0vs>0	SPLICING	0.0153210197023035	-4.99401121996108
chr4	38870019	38870167	+	FAM114A1	FAM114A1	H3k79me2	1vs<1	SPLICING	0.000174133135545909	-11.6987846675152
chr4	107183255	107183369	-	TBCK	TBCK	H3k79me2	1vs<1	SPLICING	0	-Inf
chr4	128804417	128804512	+	PLK4	PLK4	H3k79me2	1vs<1	SPLICING	0.023203081793632	-4.3516344028145
chr4	15480847	15480952	+	CC2D2A	CC2D2A	H2az	0vs>0	SPLICING	0.00166021398962985	6.56644383158533
chr4	114274201	114280455	+	ANK2	ANK2	H2az	0vs>0	SPLICING	0.00161437662848008	-7.35715878146717
chr4	159091399	159091499	-	FAM198B	FAM198B	H2az	0vs>0	SPLICING	0.000419647907901116	-9.13892946263861
chr4	40631413	40631883	-	RBM47	RBM47	H3k4me1	1vs<1	TSSS	0.00039052582419905	-9.41799034156547
chr4	87374183	87374283	-	MAPK10	MAPK10	H3k4me1	1vs<1	TSSS	0	-Inf
chr4	25657435	25657512	+	SLC34A2	SLC34A2	H3k4me2	1vs<1	TSSS	0	-Inf
chr4	40631413	40631883	-	RBM47	RBM47	H3k4me2	1vs<1	TSSS	0.0385859493904254	-4.06234515705682
chr4	41362804	41362953	+	LIMCH1	LIMCH1	H3k4me2	1vs<1	TSSS	0.0142443591709813	5.13285533888488
chr4	81106424	81106672	+	PRDM8	PRDM8	H3k4me2	1vs<1	TSSS	0.0126603314942638	5.6925358793948
chr4	130017282	130017364	+	C4orf33	C4orf33	H3k4me2	1vs<1	TSSS	0.0349171386196433	4.17487127467238
chr4	189376732	189376828	+	LOC401164	LOC401164	H3k4me2	1vs<1	TSSS	0	-Inf
chr4	81106424	81106672	+	PRDM8	PRDM8	H3k4me3	1vs<1	TSSS	0.0227537645319289	4.39375597702979
chr4	86396284	86396712	+	ARHGAP24	ARHGAP24	H3k4me3	1vs<1	TSSS	0.0327602767089106	3.83564902759665
chr4	109088711	109090112	-	LEF1	LEF1	H3k4me3	1vs<1	TSSS	0.0375210341756656	4.134012390322
chr4	130017282	130017364	+	C4orf33	C4orf33	H3k4me3	1vs<1	TSSS	0.00517124324104567	5.6490713364488
chr4	151936354	151936436	-	LRBA	LRBA	H3k4me3	1vs<1	TSSS	0.0200796365353172	4.30413423956028
chr4	153456093	153456172	-	FBXW7	FBXW7	H3k4me3	1vs<1	TSSS	0.0200706096760303	-4.30981333340375
chr4	165304339	165304407	-	MARCH1	MARCH1	H3k4me3	1vs<1	TSSS	0.000504879379963847	-9.07670106345519
chr4	189376732	189376828	+	LOC401164	LOC401164	H3k4me3	1vs<1	TSSS	0	-Inf
chr4	130017282	130017364	+	C4orf33	C4orf33	H3k9ac	1vs<1	TSSS	0.00327516056941608	6.18773214507214
chr4	153456093	153456172	-	FBXW7	FBXW7	H3k9ac	1vs<1	TSSS	0.0352796606046199	-3.8036135717899
chr4	165304339	165304407	-	MARCH1	MARCH1	H3k9ac	1vs<1	TSSS	0	-Inf
chr4	166128770	166129054	+	KLHL2	KLHL2	H3k9ac	1vs<1	TSSS	0.0257262107684165	-4.08845365698146
chr4	169753156	169753322	+	PALLD	PALLD	H3k9ac	1vs<1	TSSS	0.000246455648772182	-11.6360348607638
chr4	189376732	189376828	+	LOC401164	LOC401164	H3k9ac	1vs<1	TSSS	0	-Inf
chr4	153456093	153456172	-	FBXW7	FBXW7	H3k27ac	1vs<1	TSSS	0.0053785867596486	-5.54305298497154
chr4	169753156	169753322	+	PALLD	PALLD	H3k27ac	1vs<1	TSSS	0.00845202925740833	-5.41367164014736
chr4	189376732	189376828	+	LOC401164	LOC401164	H3k27ac	1vs<1	TSSS	0	-Inf
chr4	6473887	6474326	-	PPP2R2C	PPP2R2C	H3k27me3	1vs<1	TSSS	0.00437715680818739	-7.10534455851654
chr4	40631413	40631883	-	RBM47	RBM47	H3k27me3	1vs<1	TSSS	0.0155185566438361	-5.25536880391959
chr4	46391752	46392056	-	GABRA2	GABRA2	H3k27me3	1vs<1	TSSS	0.00369737535851562	80.0454652206219
chr4	157997277	157997449	+	GLRB	GLRB	H3k27me3	1vs<1	TSSS	0	-Inf
chr4	2010477	2010959	-	MIR943	MIR943	H3k79me2	1vs<1	TSSS	0.00924655652289602	5.62307460089385
chr4	2010477	2010959	-	MIR943	MIR943	H2az	1vs<1	TSSS	0.000376615956678679	10.4303367370111
chr4	40631413	40631883	-	RBM47	RBM47	H2az	1vs<1	TSSS	0.013942038213927	-5.15050191187886
chr4	81106424	81106672	+	PRDM8	PRDM8	H2az	1vs<1	TSSS	0.0366287670031976	4.17173881227046
chr4	109088711	109090112	-	LEF1	LEF1	H2az	1vs<1	TSSS	0.020102624536239	5.34690933334223
chr4	130017282	130017364	+	C4orf33	C4orf33	H2az	1vs<1	TSSS	0.00209989121838669	7.75015375282056
chr4	165304339	165304407	-	MARCH1	MARCH1	H2az	1vs<1	TSSS	0.00831001323804894	-5.80723156728613
chr4	189376732	189376828	+	LOC401164	LOC401164	H2az	1vs<1	TSSS	0	-Inf
chr5	112074050	112074157	+	APC	APC	H3k4me1	0vs>0	SPLICING	0.001823957259173	-7.08435006906436
chr5	176880957	176881041	+	PRR7	PRR7	H3k4me1	0vs>0	SPLICING	0.0048948659408022	6.00936314724564
chr5	141980267	141980370	-	FGF1	FGF1	H3k4me1	1vs<1	SPLICING	0	-Inf
chr5	175786814	175786921	-	KIAA1191	KIAA1191	H3k4me1	1vs<1	SPLICING	0.0196712486734573	-4.84624047591486
chr5	179271152	179271227	-	C5orf45	C5orf45	H3k4me1	1vs<1	SPLICING	0	-Inf
chr5	112074050	112074157	+	APC	APC	H3k4me2	0vs>0	SPLICING	0.00423758795388032	-6.00184179845254
chr5	52095719	52096954	+	ITGA1	ITGA1	H3k4me2	1vs<1	SPLICING	0.0387207390646303	-4.26122131035087
chr5	79286417	79286486	-	MTX3	MTX3	H3k4me2	1vs<1	SPLICING	0.000490248454188447	8.69807036269717
chr5	112074050	112074157	+	APC	APC	H3k4me3	0vs>0	SPLICING	0.00220592414598088	-6.2985684608582
chr5	79286417	79286486	-	MTX3	MTX3	H3k4me3	1vs<1	SPLICING	0.000302726138719704	9.28864940986131
chr5	141980267	141980370	-	FGF1	FGF1	H3k4me3	1vs<1	SPLICING	0	-Inf
chr5	131607484	131607601	+	PDLIM4	PDLIM4	H3k9me3	1vs<1	SPLICING	0	-Inf
chr5	150282703	150282744	-	ZNF300	ZNF300	H3k9me3	1vs<1	SPLICING	0	-Inf
chr5	179271152	179271227	-	C5orf45	C5orf45	H3k9me3	1vs<1	SPLICING	0	-Inf
chr5	52095719	52096954	+	ITGA1	ITGA1	H4k20me1	1vs<1	SPLICING	0.0119733149176431	-5.03215783266877
chr5	112090570	112090722	+	APC	APC	H4k20me1	1vs<1	SPLICING	0.0119733149176431	-5.04397004413374
chr5	179271152	179271227	-	C5orf45	C5orf45	H4k20me1	1vs<1	SPLICING	0	-Inf
chr5	112074050	112074157	+	APC	APC	H3k27ac	0vs>0	SPLICING	0.00334943422930493	-6.09914621233588
chr5	141350269	141350442	+	RNF14	RNF14	H3k27ac	1vs<1	SPLICING	0.00608732012193974	-5.75624944452922
chr5	82815168	82818128	+	VCAN	VCAN	H3k27me3	0vs>0	SPLICING	0.045768837272388	-3.84967681486981
chr5	68858500	68858597	+	GTF2H2C	GTF2H2C	H3k79me2	0vs>0	SPLICING	0	-Inf
chr5	112074050	112074157	+	APC	APC	H3k79me2	0vs>0	SPLICING	0.00326003626814341	-6.37742564664107
chr5	131310586	131310663	-	ACSL6	ACSL6	H3k79me2	0vs>0	SPLICING	0	-Inf
chr5	130651669	130651837	+	CDC42SE2	CDC42SE2	H3k79me2	1vs<1	SPLICING	0.0128435588810637	-5.01540124665725
chr5	112074050	112074157	+	APC	APC	H2az	0vs>0	SPLICING	0.00213026762156964	-6.25691693147972
chr5	52095719	52096954	+	ITGA1	ITGA1	H2az	1vs<1	SPLICING	0.0411755643007063	-3.74762946959496
chr5	79286417	79286486	-	MTX3	MTX3	H2az	1vs<1	SPLICING	0.00816486543329129	5.0455769974827
chr5	131607484	131607601	+	PDLIM4	PDLIM4	H2az	1vs<1	SPLICING	6.73492494721809e-05	-10.5186891279441
chr5	141350269	141350442	+	RNF14	RNF14	H2az	1vs<1	SPLICING	5.77977676319832e-05	-10.8214300214567
chr5	37370923	37371197	-	NUP155	NUP155	H3k4me1	1vs<1	TSSS	0	-Inf
chr5	37370923	37371197	-	NUP155	NUP155	H3k4me2	1vs<1	TSSS	0.000225572313626038	-11.3681692571638
chr5	94982583	94983778	+	RFESD	RFESD	H3k4me2	1vs<1	TSSS	0.0100120953038968	-5.62878674184466
chr5	112073556	112073622	+	APC	APC	H3k4me2	1vs<1	TSSS	0.048247164431174	-3.86149159438261
chr5	131563483	131563556	-	P4HA2	P4HA2	H3k4me2	1vs<1	TSSS	0.0349171386196433	-4.17677663198566
chr5	146833112	146833260	-	DPYSL3	DPYSL3	H3k4me2	1vs<1	TSSS	0.0207615238317321	5.0636267579793
chr5	36241601	36241900	-	C5orf33	C5orf33	H3k4me3	1vs<1	TSSS	0.00455151807062336	-5.88229959283398
chr5	37370923	37371197	-	NUP155	NUP155	H3k4me3	1vs<1	TSSS	0.000392533782466192	-9.49938270512198
chr5	38556436	38556748	-	LIFR	LIFR	H3k4me3	1vs<1	TSSS	0.0391152847717798	-3.82630896100387
chr5	75013131	75013313	-	POC5	POC5	H3k4me3	1vs<1	TSSS	0.0317115419232386	-3.86749032163836
chr5	94982583	94983778	+	RFESD	RFESD	H3k4me3	1vs<1	TSSS	0.00517124324104567	-5.67805415326843
chr5	112073556	112073622	+	APC	APC	H3k4me3	1vs<1	TSSS	0.00305843217316667	-6.30764213330942
chr5	114961298	114961876	-	TICAM2	TICAM2	H3k4me3	1vs<1	TSSS	0.0217304397321205	4.25056836027239
chr5	132166286	132166590	-	SHROOM1	SHROOM1	H3k4me3	1vs<1	TSSS	0.0317439838172252	3.85804613573585
chr5	146833112	146833260	-	DPYSL3	DPYSL3	H3k4me3	1vs<1	TSSS	0.00374204207772886	6.64102030599989
chr5	175298501	175298708	+	CPLX2	CPLX2	H3k4me3	1vs<1	TSSS	0.0216913874394419	217.180806737068
chr5	36241601	36241900	-	C5orf33	C5orf33	H3k9ac	1vs<1	TSSS	0.000585151762575758	-8.5132251849552
chr5	38556436	38556748	-	LIFR	LIFR	H3k9ac	1vs<1	TSSS	0.0180105771879777	-4.6710075846704
chr5	75013131	75013313	-	POC5	POC5	H3k9ac	1vs<1	TSSS	0.00108689123429536	-7.564834168553
chr5	112073556	112073622	+	APC	APC	H3k9ac	1vs<1	TSSS	0.00130649641004782	-7.31263334459504
chr5	121413050	121414055	-	LOX	LOX	H3k9ac	1vs<1	TSSS	0.00933572430626267	-5.04813853686586
chr5	139781399	139781858	+	ANKHD1	ANKHD1	H3k9ac	1vs<1	TSSS	0.0414015803575549	-3.63990412036259
chr5	150138421	150138657	-	DCTN4	DCTN4	H3k9ac	1vs<1	TSSS	0.0203917325596089	-4.29674801619359
chr5	176560080	176560155	+	NSD1	NSD1	H3k9ac	1vs<1	TSSS	0.0454163086798644	3.56175273188652
chr5	176937261	176937427	-	DOK3	DOK3	H4k20me1	1vs<1	TSSS	0	-Inf
chr5	36241601	36241900	-	C5orf33	C5orf33	H3k27ac	1vs<1	TSSS	0.000933093871942165	-7.57706979947707
chr5	37370923	37371197	-	NUP155	NUP155	H3k27ac	1vs<1	TSSS	0.00702116354903302	-5.21972841617548
chr5	38556436	38556748	-	LIFR	LIFR	H3k27ac	1vs<1	TSSS	0.00667228040324068	-5.69212443626185
chr5	75013131	75013313	-	POC5	POC5	H3k27ac	1vs<1	TSSS	0.000334430996247899	-9.00875939498355
chr5	112073556	112073622	+	APC	APC	H3k27ac	1vs<1	TSSS	0.000321404503198761	-9.11370919397832
chr5	121413050	121414055	-	LOX	LOX	H3k27ac	1vs<1	TSSS	0.0142130872167275	-4.52105003937246
chr5	131563483	131563556	-	P4HA2	P4HA2	H3k27ac	1vs<1	TSSS	0.00786607744935904	5.11177400988572
chr5	132166286	132166590	-	SHROOM1	SHROOM1	H3k27ac	1vs<1	TSSS	0.0462334342335979	3.53557523282594
chr5	138677519	138677669	+	PAIP2	PAIP2	H3k27ac	1vs<1	TSSS	0.0461035510895009	3.55597521897981
chr5	139781399	139781858	+	ANKHD1	ANKHD1	H3k27ac	1vs<1	TSSS	0.0396796902518128	-3.67662946308243
chr5	150138421	150138657	-	DCTN4	DCTN4	H3k27ac	1vs<1	TSSS	0.00422839204061299	-5.82839718354143
chr5	131563483	131563556	-	P4HA2	P4HA2	H3k27me3	1vs<1	TSSS	0	-Inf
chr5	37370923	37371197	-	NUP155	NUP155	H3k36me3	1vs<1	TSSS	0	-Inf
chr5	176937261	176937427	-	DOK3	DOK3	H3k36me3	1vs<1	TSSS	0.0106374383069911	-5.09242168924587
chr5	112073556	112073622	+	APC	APC	H3k79me2	1vs<1	TSSS	9.15997629165938e-05	-11.9095478771616
chr5	37370923	37371197	-	NUP155	NUP155	H2az	1vs<1	TSSS	0.00409103195433092	-6.71290552548395
chr5	94982583	94983778	+	RFESD	RFESD	H2az	1vs<1	TSSS	0.0292027213871349	-4.25082781948218
chr5	112073556	112073622	+	APC	APC	H2az	1vs<1	TSSS	0.0227411253800067	-4.4838336639061
chr5	146833112	146833260	-	DPYSL3	DPYSL3	H2az	1vs<1	TSSS	0.0310171543461011	4.44220114615572
chr5	150537241	150537443	-	ANXA6	ANXA6	H2az	1vs<1	TSSS	0.00409103195433092	7.3622785947164
chr6	4130413	4130483	-	PECI	PECI	H3k4me1	0vs>0	SPLICING	0	-Inf
chr6	135818326	135818387	-	AHI1	AHI1	H3k4me1	1vs<1	SPLICING	0	-Inf
chr6	33383012	33383106	+	PHF1	PHF1	H3k4me2	1vs<1	SPLICING	0	-Inf
chr6	139133975	139134114	+	ECT2L	ECT2L	H3k4me3	0vs>0	SPLICING	0	-Inf
chr6	161519310	161519459	+	MAP3K4	MAP3K4	H3k4me3	0vs>0	SPLICING	0	-Inf
chr6	75890655	75890927	-	COL12A1	COL12A1	H3k9ac	0vs>0	SPLICING	0	-Inf
chr6	161519310	161519459	+	MAP3K4	MAP3K4	H3k9ac	0vs>0	SPLICING	0	-Inf
chr6	26388241	26388522	+	BTN2A2	BTN2A2	H3k9ac	1vs<1	SPLICING	0	-Inf
chr6	28198114	28198266	+	ZNF193	ZNF193	H3k9me3	0vs>0	SPLICING	0	-Inf
chr6	161519310	161519459	+	MAP3K4	MAP3K4	H3k9me3	0vs>0	SPLICING	0	-Inf
chr6	26388241	26388522	+	BTN2A2	BTN2A2	H3k9me3	1vs<1	SPLICING	0	-Inf
chr6	41908108	41908323	-	CCND3	CCND3	H3k9me3	1vs<1	SPLICING	0	-Inf
chr6	161519310	161519459	+	MAP3K4	MAP3K4	H4k20me1	0vs>0	SPLICING	0	-Inf
chr6	26388241	26388522	+	BTN2A2	BTN2A2	H4k20me1	1vs<1	SPLICING	0	-Inf
chr6	37348926	37349130	+	RNF8	RNF8	H4k20me1	1vs<1	SPLICING	0.000107163761902463	-10.3407342501906
chr6	4130413	4130483	-	PECI	PECI	H3k27ac	0vs>0	SPLICING	0	-Inf
chr6	75892766	75893368	-	COL12A1	COL12A1	H3k27me3	0vs>0	SPLICING	0	-Inf
chr6	75901417	75901476	-	COL12A1	COL12A1	H3k27me3	0vs>0	SPLICING	0	-Inf
chr6	75901928	75902071	-	COL12A1	COL12A1	H3k27me3	0vs>0	SPLICING	0	-Inf
chr6	10685082	10685156	-	C6orf52	C6orf52	H3k27me3	1vs<1	SPLICING	0	-Inf
chr6	29638478	29638498	+	MOG	MOG	H3k27me3	1vs<1	SPLICING	0	-Inf
chr6	161519310	161519459	+	MAP3K4	MAP3K4	H3k36me3	0vs>0	SPLICING	0.0279556434971102	-4.55057527898053
chr6	7246657	7247454	+	RREB1	RREB1	H3k36me3	1vs<1	SPLICING	0.0254592597913566	-4.64643398727317
chr6	33383012	33383106	+	PHF1	PHF1	H3k36me3	1vs<1	SPLICING	0.0134933661456706	-5.40779103642974
chr6	57015517	57015660	+	ZNF451	ZNF451	H3k36me3	1vs<1	SPLICING	0.00576609175786136	-6.3364454828171
chr6	15660614	15660752	-	DTNBP1	DTNBP1	H3k79me2	0vs>0	SPLICING	0.00100026839552761	-7.70524760370549
chr6	28198114	28198266	+	ZNF193	ZNF193	H3k79me2	0vs>0	SPLICING	0.00024392116586908	-9.56189421933197
chr6	107351229	107351311	+	C6orf203	C6orf203	H3k79me2	0vs>0	SPLICING	0.00481083776972764	-5.94569778979157
chr6	114283531	114283558	-	HDAC2	HDAC2	H3k79me2	0vs>0	SPLICING	0.0124680034917789	-4.8701070741599
chr6	130370901	130370975	+	L3MBTL3	L3MBTL3	H3k79me2	0vs>0	SPLICING	0	-Inf
chr6	26388241	26388522	+	BTN2A2	BTN2A2	H3k79me2	1vs<1	SPLICING	0.000202140075224695	-9.78216276948386
chr6	33383012	33383106	+	PHF1	PHF1	H3k79me2	1vs<1	SPLICING	0.0260570354051665	-4.23741507475171
chr6	72128392	72128457	-	C6orf155	C6orf155	H3k79me2	1vs<1	SPLICING	0.0200885261704351	5.28074863073005
chr6	31895732	31895941	+	C2	C2	H2az	0vs>0	SPLICING	0.00166021398962985	-13.4014887595555
chr6	73000382	73000564	+	RIMS1	RIMS1	H2az	0vs>0	SPLICING	0	-Inf
chr6	75892766	75893368	-	COL12A1	COL12A1	H2az	0vs>0	SPLICING	0	-Inf
chr6	10685082	10685156	-	C6orf52	C6orf52	H2az	1vs<1	SPLICING	0	-Inf
chr6	43423725	43423786	-	DLK2	DLK2	H3k4me1	1vs<1	TSSS	0.00638419431553981	-5.9238365657937
chr6	111926979	111927474	-	TRAF3IP2	TRAF3IP2	H3k4me1	1vs<1	TSSS	0.0187047815627543	-4.81913239023584
chr6	152011631	152011799	+	ESR1	ESR1	H3k4me1	1vs<1	TSSS	0	-Inf
chr6	10694936	10695030	-	C6orf52	C6orf52	H3k4me2	1vs<1	TSSS	0.0357246809409072	-4.13737307841706
chr6	143999102	143999346	+	PHACTR2	PHACTR2	H3k4me2	1vs<1	TSSS	0.0420195816491133	-4.01210982146122
chr6	152011631	152011799	+	ESR1	ESR1	H3k4me2	1vs<1	TSSS	0.00391124867144309	-7.63498007225494
chr6	163148164	163148311	+	PACRG	PACRG	H3k4me2	1vs<1	TSSS	0.0125751310466678	7.42381390564451
chr6	10694936	10695030	-	C6orf52	C6orf52	H3k4me3	1vs<1	TSSS	0.00496630124485107	-5.75649485298752
chr6	41909190	41909552	-	CCND3	CCND3	H3k4me3	1vs<1	TSSS	0.0150838053966962	-4.58111742876854
chr6	43395292	43395495	+	ABCC10	ABCC10	H3k4me3	1vs<1	TSSS	0.0164808734016087	-4.49471850336116
chr6	43445261	43445366	+	TJAP1	TJAP1	H3k4me3	1vs<1	TSSS	0.0352260219915155	3.74721904122425
chr6	43603577	43603658	+	MAD2L1BP	MAD2L1BP	H3k4me3	1vs<1	TSSS	0.00208494651593192	6.84145017352875
chr6	57086524	57087078	-	RAB23	RAB23	H3k4me3	1vs<1	TSSS	0.0378356370927135	3.68146552764475
chr6	143999102	143999346	+	PHACTR2	PHACTR2	H3k4me3	1vs<1	TSSS	0.0349211742803917	-4.21277267516305
chr6	152011631	152011799	+	ESR1	ESR1	H3k4me3	1vs<1	TSSS	0.000138666180848397	-13.6148145096778
chr6	10411803	10412607	-	TFAP2A	TFAP2A	H3k9ac	1vs<1	TSSS	0.0479771426598557	-4.26974291172234
chr6	10694936	10695030	-	C6orf52	C6orf52	H3k9ac	1vs<1	TSSS	0.00717885339268579	-5.32782881222424
chr6	41909190	41909552	-	CCND3	CCND3	H3k9ac	1vs<1	TSSS	0.000504568536154524	-8.81945604409356
chr6	43395292	43395495	+	ABCC10	ABCC10	H3k9ac	1vs<1	TSSS	0.000998625487884075	-7.73853439399273
chr6	125474879	125475116	+	TPD52L1	TPD52L1	H3k9ac	1vs<1	TSSS	0.0176553169869595	-5.0996225239522
chr6	136871480	136871957	-	MAP7	MAP7	H3k9ac	1vs<1	TSSS	0.0109484609711607	-5.21974985768346
chr6	152011631	152011799	+	ESR1	ESR1	H3k9ac	1vs<1	TSSS	7.46903902687998e-05	-14.7791539784002
chr6	167040409	167040726	-	RPS6KA2	RPS6KA2	H3k9ac	1vs<1	TSSS	0.0334858754229322	3.95444576023912
chr6	41909190	41909552	-	CCND3	CCND3	H3k9me3	1vs<1	TSSS	0	-Inf
chr6	10694936	10695030	-	C6orf52	C6orf52	H3k27ac	1vs<1	TSSS	0.00106716602819991	-7.37180443334308
chr6	41909190	41909552	-	CCND3	CCND3	H3k27ac	1vs<1	TSSS	0.00243748815138306	-6.39750699303328
chr6	43395292	43395495	+	ABCC10	ABCC10	H3k27ac	1vs<1	TSSS	0.000788470072956465	-7.81023318343406
chr6	152011631	152011799	+	ESR1	ESR1	H3k27ac	1vs<1	TSSS	0	-Inf
chr6	159528823	159529185	+	XLOC_023818	XLOC_023818	H3k27ac	1vs<1	TSSS	0	-Inf
chr6	43423725	43423786	-	DLK2	DLK2	H3k27me3	1vs<1	TSSS	0.038516008712123	-4.38530378780289
chr6	167525295	167525502	+	CCR6	CCR6	H3k27me3	1vs<1	TSSS	0.000178914683355047	-10.5756103614244
chr6	43395292	43395495	+	ABCC10	ABCC10	H3k79me2	1vs<1	TSSS	0	-Inf
chr6	57086524	57087078	-	RAB23	RAB23	H3k79me2	1vs<1	TSSS	0.010352632284411	5.46368167051871
chr6	10555949	10557575	+	GCNT2	GCNT2	H2az	1vs<1	TSSS	0.00409103195433092	-6.74819621725018
chr6	41909190	41909552	-	CCND3	CCND3	H2az	1vs<1	TSSS	0.0105628319862738	-5.54929422426605
chr6	43423725	43423786	-	DLK2	DLK2	H2az	1vs<1	TSSS	0.00439706178117359	-6.54930719226996
chr6	57086524	57087078	-	RAB23	RAB23	H2az	1vs<1	TSSS	9.66648376683428e-05	12.685623280156
chr6	105627708	105627858	-	POPDC3	POPDC3	H2az	1vs<1	TSSS	0.035244575847754	4.25938748934378
chr6	152011631	152011799	+	ESR1	ESR1	H2az	1vs<1	TSSS	0.00093397117730366	-10.3393633466628
chr7	76240771	76240908	-	POMZP3	POMZP3	H3k4me1	0vs>0	SPLICING	0	-Inf
chr7	92214612	92214710	-	FAM133B	FAM133B	H3k4me1	0vs>0	SPLICING	0	-Inf
chr7	99270407	99270538	-	CYP3A5	CYP3A5	H3k4me1	1vs<1	SPLICING	0.00067781451902675	-9.36016581760688
chr7	20825567	20825662	-	SP8	SP8	H3k4me2	1vs<1	SPLICING	0.0183509449038982	8.46147511400135
chr7	856917	857136	+	SUN1	SUN1	H3k4me3	0vs>0	SPLICING	0.00110579001101117	-7.13131954268034
chr7	14028893	14029089	-	ETV1	ETV1	H3k4me3	0vs>0	SPLICING	0.00187284640995087	7.21536853597748
chr7	6474393	6474651	-	DAGLB	DAGLB	H3k4me3	1vs<1	SPLICING	0.0314341927857813	-4.2458459713926
chr7	856917	857136	+	SUN1	SUN1	H3k9ac	0vs>0	SPLICING	0.00317613800219092	-6.07331812323268
chr7	14028893	14029089	-	ETV1	ETV1	H3k9ac	0vs>0	SPLICING	0.00567841577200776	5.95935004438362
chr7	56146057	56146201	+	SUMF2	SUMF2	H3k9ac	1vs<1	SPLICING	0	-Inf
chr7	152549211	152549336	+	ACTR3B	ACTR3B	H3k9me3	1vs<1	SPLICING	0	-Inf
chr7	6438293	6438349	+	RAC1	RAC1	H4k20me1	0vs>0	SPLICING	0	-Inf
chr7	36554078	36554196	-	AOAH	AOAH	H4k20me1	0vs>0	SPLICING	0	-Inf
chr7	76240771	76240908	-	POMZP3	POMZP3	H4k20me1	0vs>0	SPLICING	0	-Inf
chr7	139652350	139652487	+	TBXAS1	TBXAS1	H4k20me1	0vs>0	SPLICING	0	-Inf
chr7	856917	857136	+	SUN1	SUN1	H3k27ac	0vs>0	SPLICING	0.00899019760971665	-5.09705529835388
chr7	14028893	14029089	-	ETV1	ETV1	H3k27ac	0vs>0	SPLICING	0.00899019760971665	5.49348784234969
chr7	36554078	36554196	-	AOAH	AOAH	H3k27ac	0vs>0	SPLICING	0	-Inf
chr7	92214612	92214710	-	FAM133B	FAM133B	H3k27ac	0vs>0	SPLICING	0.00845505190931754	-5.20322115007551
chr7	76240771	76240908	-	POMZP3	POMZP3	H3k27me3	0vs>0	SPLICING	0	-Inf
chr7	6438293	6438349	+	RAC1	RAC1	H3k36me3	0vs>0	SPLICING	0.00363947752955736	-6.49223578635529
chr7	30537357	30537512	-	GGCT	GGCT	H3k36me3	0vs>0	SPLICING	0.0053908567559354	-6.08502915138441
chr7	36554078	36554196	-	AOAH	AOAH	H3k36me3	0vs>0	SPLICING	0	-Inf
chr7	76240771	76240908	-	POMZP3	POMZP3	H3k36me3	0vs>0	SPLICING	5.99216169372781e-05	-11.7431689980126
chr7	139652350	139652487	+	TBXAS1	TBXAS1	H3k36me3	0vs>0	SPLICING	0	-Inf
chr7	6470111	6470238	-	DAGLB	DAGLB	H3k36me3	1vs<1	SPLICING	0.0116698247488323	-5.57473107109074
chr7	56146057	56146201	+	SUMF2	SUMF2	H3k36me3	1vs<1	SPLICING	0.0458394766798769	-4.17602243011611
chr7	64852815	64852941	+	ZNF92	ZNF92	H3k36me3	1vs<1	SPLICING	0.00302321700957872	-7.1288456551357
chr7	92195328	92195375	-	FAM133B	FAM133B	H3k36me3	1vs<1	SPLICING	0.000210402093672305	-10.7265777424495
chr7	30537357	30537512	-	GGCT	GGCT	H3k79me2	0vs>0	SPLICING	0.000419030397695095	-8.81681647461452
chr7	76240771	76240908	-	POMZP3	POMZP3	H3k79me2	0vs>0	SPLICING	1.32154736944243e-05	-14.3028859611818
chr7	76241039	76241130	-	POMZP3	POMZP3	H3k79me2	0vs>0	SPLICING	0	-Inf
chr7	116831689	116831815	+	ST7	ST7	H3k79me2	0vs>0	SPLICING	0	-Inf
chr7	65592691	65592727	+	CRCP	CRCP	H3k79me2	1vs<1	SPLICING	0.0157125351287555	-4.81590979060305
chr7	116140314	116140501	+	CAV2	CAV2	H3k79me2	1vs<1	SPLICING	0.00164326120438588	-11.2184341488787
chr7	155093276	155093400	+	INSIG1	INSIG1	H3k79me2	1vs<1	SPLICING	0.000131345941051355	10.6177662951584
chr7	856917	857136	+	SUN1	SUN1	H2az	0vs>0	SPLICING	0.00213026762156964	-6.24475297624302
chr7	14028893	14029089	-	ETV1	ETV1	H2az	0vs>0	SPLICING	7.11038299429592e-06	17.1221177586718
chr7	128049495	128049538	-	IMPDH1	IMPDH1	H2az	0vs>0	SPLICING	0.0242428430287158	-4.10075234880436
chr7	28725721	28725814	+	CREB5	CREB5	H3k4me1	1vs<1	TSSS	0.000261851187483362	-10.0548942879805
chr7	28725721	28725814	+	CREB5	CREB5	H3k4me2	1vs<1	TSSS	0.00127042073404046	-8.53511428032666
chr7	34797686	34797884	-	AAA1	AAA1	H3k4me2	1vs<1	TSSS	0	-Inf
chr7	93204004	93204042	-	CALCR	CALCR	H3k4me2	1vs<1	TSSS	0	-Inf
chr7	116593381	116593745	+	ST7	ST7	H3k4me2	1vs<1	TSSS	0.0251750875511829	4.55082632694585
chr7	134464164	134464500	+	CALD1	CALD1	H3k4me2	1vs<1	TSSS	0.00731816286657351	-7.44904930663363
chr7	150974163	150974231	-	SMARCD3	SMARCD3	H3k4me2	1vs<1	TSSS	0.00821010338285167	-5.92143117581493
chr7	28725721	28725814	+	CREB5	CREB5	H3k4me3	1vs<1	TSSS	0.000633104882799563	-8.65002702365276
chr7	34797686	34797884	-	AAA1	AAA1	H3k4me3	1vs<1	TSSS	0	-Inf
chr7	93204004	93204042	-	CALCR	CALCR	H3k4me3	1vs<1	TSSS	0	-Inf
chr7	129251555	129251665	+	NRF1	NRF1	H3k4me3	1vs<1	TSSS	0.00662010877046083	-5.3976639151057
chr7	132261181	132261323	-	PLXNA4	PLXNA4	H3k4me3	1vs<1	TSSS	0.0317439838172252	-4.06144330154435
chr7	143059669	143059840	-	FAM131B	FAM131B	H3k4me3	1vs<1	TSSS	0.00631737455585529	5.88318961170919
chr7	151573592	151574316	-	PRKAG2	PRKAG2	H3k4me3	1vs<1	TSSS	0.0250652267324946	-4.06251456514584
chr7	34797686	34797884	-	AAA1	AAA1	H3k9ac	1vs<1	TSSS	0	-Inf
chr7	116593381	116593745	+	ST7	ST7	H3k9ac	1vs<1	TSSS	0.0479771426598557	-3.51217829334101
chr7	129251555	129251665	+	NRF1	NRF1	H3k9ac	1vs<1	TSSS	0.00106221170254689	-7.61600944133819
chr7	132261181	132261323	-	PLXNA4	PLXNA4	H3k9ac	1vs<1	TSSS	0.0482271365590357	-3.6637945147748
chr7	150974163	150974231	-	SMARCD3	SMARCD3	H3k9ac	1vs<1	TSSS	0.00335011001224266	-6.15580714087536
chr7	151573592	151574316	-	PRKAG2	PRKAG2	H3k9ac	1vs<1	TSSS	0.0152060675217127	-4.56467376368754
chr7	28725721	28725814	+	CREB5	CREB5	H3k27ac	1vs<1	TSSS	0.0300544118411292	-3.89584223401061
chr7	33102180	33102409	-	NT5C3	NT5C3	H3k27ac	1vs<1	TSSS	0.000102678636135367	11.3004909225312
chr7	34797686	34797884	-	AAA1	AAA1	H3k27ac	1vs<1	TSSS	0	-Inf
chr7	116593381	116593745	+	ST7	ST7	H3k27ac	1vs<1	TSSS	0.0328804248347389	-3.82736936850747
chr7	129251555	129251665	+	NRF1	NRF1	H3k27ac	1vs<1	TSSS	0.00106716602819991	-7.39203093084653
chr7	151573592	151574316	-	PRKAG2	PRKAG2	H3k27me3	1vs<1	TSSS	0.0185200840484442	5.07490630996692
chr7	28725721	28725814	+	CREB5	CREB5	H3k79me2	1vs<1	TSSS	0	-Inf
chr7	115850581	115850788	+	TES	TES	H3k79me2	1vs<1	TSSS	0.000441812920722669	-9.51470215398149
chr7	116593381	116593745	+	ST7	ST7	H3k79me2	1vs<1	TSSS	0.0101325969017692	-5.51265645461753
chr7	150020558	150020758	-	ACTR3C	ACTR3C	H3k79me2	1vs<1	TSSS	0.00459131598551938	-7.03116360544771
chr7	28725721	28725814	+	CREB5	CREB5	H2az	1vs<1	TSSS	0	-Inf
chr7	30029258	30029425	-	SCRN1	SCRN1	H2az	1vs<1	TSSS	0.0115628957886723	-5.3924348843159
chr7	33102180	33102409	-	NT5C3	NT5C3	H2az	1vs<1	TSSS	0.00431584424194429	6.5901750543734
chr7	115850581	115850788	+	TES	TES	H2az	1vs<1	TSSS	0.0395806095500859	-4.0599604128555
chr7	129251555	129251665	+	NRF1	NRF1	H2az	1vs<1	TSSS	0.0136354728719362	-5.19169428873822
chr7	150130742	150130917	+	LOC285972	LOC285972	H2az	1vs<1	TSSS	0	-Inf
chr8	141994177	141994254	-	PTK2	PTK2	H3k4me1	0vs>0	SPLICING	0	-Inf
chr8	22269550	22269719	+	SLC39A14	SLC39A14	H3k4me1	1vs<1	SPLICING	0.0193367303354104	-4.88843838427127
chr8	105544135	105544191	-	LRP12	LRP12	H3k4me1	1vs<1	SPLICING	0	-Inf
chr8	29202887	29203591	-	DUSP4	DUSP4	H3k4me2	0vs>0	SPLICING	0.0440113406221516	-4.20035306719378
chr8	22900651	22900756	-	TNFRSF10B	TNFRSF10B	H3k4me2	1vs<1	SPLICING	0.000166848443301581	-10.2572946896304
chr8	22267459	22267628	+	SLC39A14	SLC39A14	H3k9ac	0vs>0	SPLICING	0	-Inf
chr8	105544135	105544191	-	LRP12	LRP12	H3k9ac	1vs<1	SPLICING	0	-Inf
chr8	93966634	93966792	-	C8orf83	C8orf83	H3k9me1	1vs<1	SPLICING	0	-Inf
chr8	99101304	99102257	+	C8orf47	C8orf47	H3k9me1	1vs<1	SPLICING	0	-Inf
chr8	22900651	22900756	-	TNFRSF10B	TNFRSF10B	H3k9me3	1vs<1	SPLICING	0	-Inf
chr8	22900651	22900756	-	TNFRSF10B	TNFRSF10B	H4k20me1	1vs<1	SPLICING	0.00388840034317237	-6.11706386493475
chr8	42694329	42694524	-	THAP1	THAP1	H4k20me1	1vs<1	SPLICING	0.00423936794168344	-5.98436221922613
chr8	22900651	22900756	-	TNFRSF10B	TNFRSF10B	H3k27ac	1vs<1	SPLICING	0	-Inf
chr8	105544135	105544191	-	LRP12	LRP12	H3k27ac	1vs<1	SPLICING	0	-Inf
chr8	22900651	22900756	-	TNFRSF10B	TNFRSF10B	H3k36me3	1vs<1	SPLICING	0.000866749704932638	-8.68269263508298
chr8	141935760	141935848	-	PTK2	PTK2	H3k36me3	1vs<1	SPLICING	0	-Inf
chr8	29202887	29203591	-	DUSP4	DUSP4	H3k79me2	0vs>0	SPLICING	0.00638168511534634	-6.76213653289088
chr8	144674817	144674830	-	EEF1D	EEF1D	H3k79me2	0vs>0	SPLICING	0.0115112460549834	-4.9756817711515
chr8	22900651	22900756	-	TNFRSF10B	TNFRSF10B	H3k79me2	1vs<1	SPLICING	0.00757496184607403	-5.56583443236033
chr8	27168999	27169226	+	PTK2B	PTK2B	H3k4me1	1vs<1	TSSS	0.00066815808954674	-8.66010074906045
chr8	70378859	70379185	+	SULF1	SULF1	H3k4me1	1vs<1	TSSS	0.00897726355209382	-5.96481055100093
chr8	143751726	143751986	+	PSCA	PSCA	H3k4me1	1vs<1	TSSS	0.00832774814259968	-6.06869433717678
chr8	19171081	19171334	+	SH2D4A	SH2D4A	H3k4me2	1vs<1	TSSS	0.00841754384053	6.36421219153801
chr8	37594097	37594196	+	ERLIN2	ERLIN2	H3k4me2	1vs<1	TSSS	0.000954045611738579	-8.92771769595747
chr8	70378859	70379185	+	SULF1	SULF1	H3k4me2	1vs<1	TSSS	0.0126338459881351	-5.71436287450067
chr8	70747089	70747299	-	SLCO5A1	SLCO5A1	H3k4me2	1vs<1	TSSS	0.0349171386196433	4.80147574566703
chr8	143751726	143751986	+	PSCA	PSCA	H3k4me2	1vs<1	TSSS	0.0287402632756478	-4.66087937272801
chr8	19171081	19171334	+	SH2D4A	SH2D4A	H3k4me3	1vs<1	TSSS	0.00462067634693622	6.35535049670641
chr8	32405728	32406344	+	NRG1	NRG1	H3k4me3	1vs<1	TSSS	0.00280623169700963	7.99625035030069
chr8	37594097	37594196	+	ERLIN2	ERLIN2	H3k4me3	1vs<1	TSSS	0.00117435270428331	-7.7242162245755
chr8	41348081	41348136	+	GOLGA7	GOLGA7	H3k4me3	1vs<1	TSSS	0.000278411048678553	-10.0722896613747
chr8	59572132	59572404	-	NSMAF	NSMAF	H3k4me3	1vs<1	TSSS	0.000553465738545092	-8.86931070841286
chr8	70747089	70747299	-	SLCO5A1	SLCO5A1	H3k4me3	1vs<1	TSSS	0.0106652624504593	5.80815100405698
chr8	135725088	135725292	-	ZFAT	ZFAT	H3k4me3	1vs<1	TSSS	0.000898101649406608	-8.19114439060774
chr8	143751726	143751986	+	PSCA	PSCA	H3k4me3	1vs<1	TSSS	0.00631737455585529	-5.879045380618
chr8	29207363	29208185	-	DUSP4	DUSP4	H3k9ac	1vs<1	TSSS	0.0354395571312101	-3.8732680584314
chr8	32405728	32406344	+	NRG1	NRG1	H3k9ac	1vs<1	TSSS	0.00377761133680491	7.37365454714615
chr8	37594097	37594196	+	ERLIN2	ERLIN2	H3k9ac	1vs<1	TSSS	0.000361321694025597	-9.41868453835991
chr8	41348081	41348136	+	GOLGA7	GOLGA7	H3k9ac	1vs<1	TSSS	0.00348522473319298	-6.09788160180218
chr8	59572132	59572404	-	NSMAF	NSMAF	H3k9ac	1vs<1	TSSS	0.0043341317662541	-5.8511085765346
chr8	70378859	70379185	+	SULF1	SULF1	H3k9ac	1vs<1	TSSS	0.00509650573630857	-6.16739934321523
chr8	135725088	135725292	-	ZFAT	ZFAT	H3k9ac	1vs<1	TSSS	0.0115074887557984	-4.81905267363692
chr8	143751726	143751986	+	PSCA	PSCA	H3k9ac	1vs<1	TSSS	0.00715186354773966	-5.75528870523461
chr8	41348081	41348136	+	GOLGA7	GOLGA7	H4k20me1	1vs<1	TSSS	0	-Inf
chr8	135725088	135725292	-	ZFAT	ZFAT	H4k20me1	1vs<1	TSSS	0	-Inf
chr8	29207363	29208185	-	DUSP4	DUSP4	H3k27ac	1vs<1	TSSS	0.0300544118411292	-4.40117992990349
chr8	37594097	37594196	+	ERLIN2	ERLIN2	H3k27ac	1vs<1	TSSS	9.14292528722123e-05	-11.6072205618376
chr8	38325499	38326352	-	FGFR1	FGFR1	H3k27ac	1vs<1	TSSS	0.0381466587829095	3.70877474372743
chr8	41348081	41348136	+	GOLGA7	GOLGA7	H3k27ac	1vs<1	TSSS	1.3841782615863e-06	-21.4037272316129
chr8	59572132	59572404	-	NSMAF	NSMAF	H3k27ac	1vs<1	TSSS	0.0011975515455998	-7.20644350477074
chr8	124553139	124553446	-	FBXO32	FBXO32	H3k27ac	1vs<1	TSSS	0.0130765160208183	4.64025981689421
chr8	135725088	135725292	-	ZFAT	ZFAT	H3k27ac	1vs<1	TSSS	0.00175012904718843	-6.77355661301957
chr8	143751726	143751986	+	PSCA	PSCA	H3k27ac	1vs<1	TSSS	0.0035757465102664	-6.52013456554745
chr8	143751726	143751986	+	PSCA	PSCA	H3k79me2	1vs<1	TSSS	7.36538697518265e-05	-15.0565623787368
chr8	19171081	19171334	+	SH2D4A	SH2D4A	H2az	1vs<1	TSSS	0.0434724741489704	3.95943867274809
chr8	32405728	32406344	+	NRG1	NRG1	H2az	1vs<1	TSSS	0.00285738243654926	9.38857829044681
chr8	37594097	37594196	+	ERLIN2	ERLIN2	H2az	1vs<1	TSSS	0.00158510853081618	-8.29131379002019
chr8	41348081	41348136	+	GOLGA7	GOLGA7	H2az	1vs<1	TSSS	0.00196241920768197	-7.87806344983014
chr8	70378859	70379185	+	SULF1	SULF1	H2az	1vs<1	TSSS	0.0330830802635435	-4.35817001034209
chr8	143751726	143751986	+	PSCA	PSCA	H2az	1vs<1	TSSS	0.0241746049020383	-4.68620630744351
chr9	79074976	79075093	+	GCNT1	GCNT1	H3k4me1	0vs>0	SPLICING	0.000824775017265209	-8.13533941580785
chr9	131871458	131871556	-	CRAT	CRAT	H3k4me1	0vs>0	SPLICING	0.00136537162816636	-7.47711169510373
chr9	131600497	131600646	-	CCBL1	CCBL1	H3k4me1	1vs<1	SPLICING	0	-Inf
chr9	79074976	79075093	+	GCNT1	GCNT1	H3k4me2	0vs>0	SPLICING	0.0435723997454584	-3.76782964858558
chr9	124043748	124043840	+	GSN	GSN	H3k4me2	1vs<1	SPLICING	0.0467556900368273	-4.03099392708766
chr9	131600497	131600646	-	CCBL1	CCBL1	H3k4me2	1vs<1	SPLICING	0	-Inf
chr9	124971893	124971996	-	LHX6	LHX6	H3k4me3	0vs>0	SPLICING	0	-Inf
chr9	124043748	124043840	+	GSN	GSN	H3k4me3	1vs<1	SPLICING	0	-Inf
chr9	79074976	79075093	+	GCNT1	GCNT1	H3k9ac	0vs>0	SPLICING	0.0389057361699488	-3.84447490526742
chr9	130678687	130678773	-	ST6GALNAC4	ST6GALNAC4	H3k9ac	1vs<1	SPLICING	0.00629710580978638	-5.47052704289695
chr9	34216672	34216787	+	UBAP1	UBAP1	H4k20me1	0vs>0	SPLICING	0	-Inf
chr9	36198976	36199093	+	CLTA	CLTA	H4k20me1	1vs<1	SPLICING	0.000566117255837549	-8.17120697324868
chr9	131648294	131648400	+	LRRC8A	LRRC8A	H4k20me1	1vs<1	SPLICING	0.00390626296931704	-6.08497516464021
chr9	124043748	124043840	+	GSN	GSN	H3k27ac	1vs<1	SPLICING	0.00997631736305112	-5.26898615415374
chr9	130678687	130678773	-	ST6GALNAC4	ST6GALNAC4	H3k27ac	1vs<1	SPLICING	0.00771884508356025	-5.51664697401068
chr9	131600497	131600646	-	CCBL1	CCBL1	H3k27ac	1vs<1	SPLICING	0	-Inf
chr9	131891264	131891389	+	PPP2R4	PPP2R4	H3k27ac	1vs<1	SPLICING	0	-Inf
chr9	79074976	79075093	+	GCNT1	GCNT1	H3k27me3	0vs>0	SPLICING	0	-Inf
chr9	124971893	124971996	-	LHX6	LHX6	H3k27me3	0vs>0	SPLICING	0	-Inf
chr9	131871458	131871556	-	CRAT	CRAT	H3k27me3	0vs>0	SPLICING	0	-Inf
chr9	4722506	4722625	-	AK3	AK3	H3k36me3	1vs<1	SPLICING	0	-Inf
chr9	34220906	34220946	+	UBAP1	UBAP1	H3k36me3	1vs<1	SPLICING	0	-Inf
chr9	114409387	114409539	+	DNAJC25	DNAJC25	H3k36me3	1vs<1	SPLICING	0.0217083927724558	-4.87229344194621
chr9	127055128	127055292	+	NEK6	NEK6	H3k79me2	0vs>0	SPLICING	0.0124680034917789	4.86566973097787
chr9	32550772	32550966	-	TOPORS	TOPORS	H3k79me2	1vs<1	SPLICING	0.00251631396439587	6.64982536051475
chr9	36198976	36199093	+	CLTA	CLTA	H3k79me2	1vs<1	SPLICING	0.0202760100844067	-4.50292996495077
chr9	95637297	95637341	-	ZNF484	ZNF484	H3k79me2	1vs<1	SPLICING	8.45151452133051e-05	-11.3329769305321
chr9	130678687	130678773	-	ST6GALNAC4	ST6GALNAC4	H3k79me2	1vs<1	SPLICING	0.0109339345708281	-5.18857023915193
chr9	131891264	131891389	+	PPP2R4	PPP2R4	H3k79me2	1vs<1	SPLICING	0	-Inf
chr9	32550772	32550966	-	TOPORS	TOPORS	H2az	1vs<1	SPLICING	0.00221966971347698	6.37808628517009
chr9	124043748	124043840	+	GSN	GSN	H2az	1vs<1	SPLICING	0	-Inf
chr9	14313481	14314045	-	NFIB	NFIB	H3k4me1	1vs<1	TSSS	0	-Inf
chr9	71939488	71939546	+	FAM189A2	FAM189A2	H3k4me1	1vs<1	TSSS	0	-Inf
chr9	99329050	99329203	-	CDC14B	CDC14B	H3k4me1	1vs<1	TSSS	0.00135192024304073	-7.63430577464848
chr9	106854370	106854755	-	XLOC_029285	XLOC_029285	H3k4me1	1vs<1	TSSS	0.0174480957792671	5.23239524047444
chr9	130540870	130541048	-	SH2D3C	SH2D3C	H3k4me1	1vs<1	TSSS	0.000303128820989294	-9.80089744768109
chr9	133589268	133589842	+	ABL1	ABL1	H3k4me1	1vs<1	TSSS	0.0134283571885081	-5.11598976394681
chr9	23825804	23826063	-	ELAVL2	ELAVL2	H3k4me2	1vs<1	TSSS	0.039003108986272	6.07721216777687
chr9	87283466	87283700	+	NTRK2	NTRK2	H3k4me2	1vs<1	TSSS	0.0316854689495584	4.9261346225497
chr9	88714326	88714510	-	GOLM1	GOLM1	H3k4me2	1vs<1	TSSS	0.0275912371479389	4.44592280155659
chr9	99329050	99329203	-	CDC14B	CDC14B	H3k4me2	1vs<1	TSSS	0.0067709282063645	-6.21646384941616
chr9	114361619	114361711	-	PTGR1	PTGR1	H3k4me2	1vs<1	TSSS	0.0268189720875357	4.48483774865677
chr9	131451509	131451934	+	SET	SET	H3k4me2	1vs<1	TSSS	0.00539155524301695	-6.54851581209678
chr9	137001210	137001322	+	WDR5	WDR5	H3k4me2	1vs<1	TSSS	0.00136549137411531	-8.35833979402907
chr9	6757641	6758203	+	KDM4C	KDM4C	H3k4me3	1vs<1	TSSS	0.0442760932316276	-3.54619233856525
chr9	14313481	14314045	-	NFIB	NFIB	H3k4me3	1vs<1	TSSS	0.039311123468787	3.81387224761302
chr9	23825804	23826063	-	ELAVL2	ELAVL2	H3k4me3	1vs<1	TSSS	0.00508511051319052	10.6466196629359
chr9	34989725	34989828	+	DNAJB5	DNAJB5	H3k4me3	1vs<1	TSSS	0.00112524824157947	8.64069121767385
chr9	35490007	35490169	+	RUSC2	RUSC2	H3k4me3	1vs<1	TSSS	0.00168264392223007	-7.16515725386933
chr9	71939488	71939546	+	FAM189A2	FAM189A2	H3k4me3	1vs<1	TSSS	0.00191029000309641	-8.85001321445835
chr9	87283466	87283700	+	NTRK2	NTRK2	H3k4me3	1vs<1	TSSS	0.0189957827202878	5.01111572977505
chr9	114361619	114361711	-	PTGR1	PTGR1	H3k4me3	1vs<1	TSSS	0.00103647423519532	7.93360044419182
chr9	14313481	14314045	-	NFIB	NFIB	H3k9ac	1vs<1	TSSS	0.00132944044236225	8.07838606383342
chr9	35490007	35490169	+	RUSC2	RUSC2	H3k9ac	1vs<1	TSSS	0.00108689123429536	-7.55601378655024
chr9	88714326	88714510	-	GOLM1	GOLM1	H3k9ac	1vs<1	TSSS	0.0129374364993693	4.7144288542083
chr9	99329050	99329203	-	CDC14B	CDC14B	H3k9ac	1vs<1	TSSS	0.0307093064599777	-3.9357161831131
chr9	134612792	134612925	-	RAPGEF1	RAPGEF1	H4k20me1	1vs<1	TSSS	0	-Inf
chr9	14313481	14314045	-	NFIB	NFIB	H3k27ac	1vs<1	TSSS	0.000321404503198761	10.3720948258604
chr9	35490007	35490169	+	RUSC2	RUSC2	H3k27ac	1vs<1	TSSS	0.000512999728114227	-8.40936725403162
chr9	102584137	102584689	+	NR4A3	NR4A3	H3k27ac	1vs<1	TSSS	0.0484447062884714	-3.78954343839678
chr9	99329050	99329203	-	CDC14B	CDC14B	H3k27me3	1vs<1	TSSS	4.07003812261549e-05	-13.0626958473974
chr9	100263462	100263549	+	TMOD1	TMOD1	H3k27me3	1vs<1	TSSS	0.029508054679165	-4.61003660089191
chr9	35490007	35490169	+	RUSC2	RUSC2	H3k79me2	1vs<1	TSSS	0.0136934933561908	-5.20191865930014
chr9	131451509	131451934	+	SET	SET	H3k79me2	1vs<1	TSSS	0.0433685025709067	-4.12628752128708
chr9	34989725	34989828	+	DNAJB5	DNAJB5	H2az	1vs<1	TSSS	0.013942038213927	5.22974693616747
chr9	35490007	35490169	+	RUSC2	RUSC2	H2az	1vs<1	TSSS	0.0246172251925719	-4.3926470293633
chr9	71939488	71939546	+	FAM189A2	FAM189A2	H2az	1vs<1	TSSS	0.0324214994935132	-4.74748931031886
chr9	77502547	77502636	-	TRPM6	TRPM6	H2az	1vs<1	TSSS	0.0103545357819767	6.04072011899317
chr9	99329050	99329203	-	CDC14B	CDC14B	H2az	1vs<1	TSSS	0.0325156465108438	-4.15032528041169
chr9	100954841	100954956	-	CORO2A	CORO2A	H2az	1vs<1	TSSS	0.0361913479917148	4.20911061482594
chr9	114361619	114361711	-	PTGR1	PTGR1	H2az	1vs<1	TSSS	0.0411550299850758	3.85314865460178
chr9	127020530	127020640	+	NEK6	NEK6	H2az	1vs<1	TSSS	1.74273456782849e-05	-15.9777479138959
chr9	133589268	133589842	+	ABL1	ABL1	H2az	1vs<1	TSSS	0.0330830802635435	-4.1236329487886
chrX	19364628	19364741	+	PDHA1	PDHA1	H3k4me2	0vs>0	SPLICING	0	-Inf
chrX	48334951	48335056	+	FTSJ1	FTSJ1	H3k4me2	0vs>0	SPLICING	0.00975707847383014	-5.15186692868357
chrX	71840575	71840751	-	PHKA1	PHKA1	H3k4me2	0vs>0	SPLICING	0.0287090556268787	4.16650850078424
chrX	16836697	16837000	+	TXLNG	TXLNG	H3k4me2	1vs<1	SPLICING	0	-Inf
chrX	100872493	100872574	-	ARMCX6	ARMCX6	H3k4me2	1vs<1	SPLICING	0.0180455233234382	5.04712264929946
chrX	48334951	48335056	+	FTSJ1	FTSJ1	H3k4me3	0vs>0	SPLICING	0.00302378574496617	-5.97678808210138
chrX	51637723	51637890	+	MAGED1	MAGED1	H3k4me3	0vs>0	SPLICING	0.00471065678211525	5.97616324815898
chrX	152000178	152000244	+	NSDHL	NSDHL	H3k4me3	0vs>0	SPLICING	0.0132262743279739	-4.44603329338497
chrX	48334951	48335056	+	FTSJ1	FTSJ1	H3k9ac	0vs>0	SPLICING	0.00226491052770134	-6.42144047081246
chrX	51637723	51637890	+	MAGED1	MAGED1	H3k9ac	0vs>0	SPLICING	0.00567841577200776	5.9431626556552
chrX	78618920	78619051	-	ITM2A	ITM2A	H3k9ac	1vs<1	SPLICING	0	-Inf
chrX	100872493	100872574	-	ARMCX6	ARMCX6	H3k9ac	1vs<1	SPLICING	0.0018803638259232	6.7031386814381
chrX	19364628	19364741	+	PDHA1	PDHA1	H4k20me1	0vs>0	SPLICING	0	-Inf
chrX	48334951	48335056	+	FTSJ1	FTSJ1	H4k20me1	0vs>0	SPLICING	0	-Inf
chrX	48334951	48335056	+	FTSJ1	FTSJ1	H3k27ac	0vs>0	SPLICING	0.00138682470829941	-7.11219563654004
chrX	152000178	152000244	+	NSDHL	NSDHL	H3k27ac	0vs>0	SPLICING	0.0383504120924259	-3.90514424294763
chrX	51637723	51637890	+	MAGED1	MAGED1	H3k27me3	0vs>0	SPLICING	0	-Inf
chrX	65390400	65390579	+	HEPH	HEPH	H3k27me3	0vs>0	SPLICING	0	-Inf
chrX	71840575	71840751	-	PHKA1	PHKA1	H3k27me3	0vs>0	SPLICING	0.00649375311996835	-5.40183982340905
chrX	7035007	7035075	-	HDHD1	HDHD1	H3k36me3	0vs>0	SPLICING	0	-Inf
chrX	16838287	16838378	+	TXLNG	TXLNG	H3k36me3	1vs<1	SPLICING	0	-Inf
chrX	7035007	7035075	-	HDHD1	HDHD1	H3k79me2	0vs>0	SPLICING	0	-Inf
chrX	48334951	48335056	+	FTSJ1	FTSJ1	H3k79me2	0vs>0	SPLICING	0.00591486913164198	-5.69636292567391
chrX	16836697	16837000	+	TXLNG	TXLNG	H3k79me2	1vs<1	SPLICING	0.00072437058430511	-8.08889183499463
chrX	153741147	153741260	-	FAM3A	FAM3A	H3k79me2	1vs<1	SPLICING	0	-Inf
chrX	48334951	48335056	+	FTSJ1	FTSJ1	H2az	0vs>0	SPLICING	0.00165614865174908	-6.62162886513064
chrX	51637723	51637890	+	MAGED1	MAGED1	H2az	0vs>0	SPLICING	0	-Inf
chrX	100872493	100872574	-	ARMCX6	ARMCX6	H2az	1vs<1	SPLICING	0.0076858989914391	5.12886594058081
chrX	67867511	67867769	+	STARD8	STARD8	H3k4me1	1vs<1	TSSS	0.000943475325381063	-8.17475058818413
chrX	24690687	24690979	-	PCYT1B	PCYT1B	H3k4me2	1vs<1	TSSS	5.43090394764484e-05	-13.9345216553792
chrX	46771868	46772154	+	PHF16	PHF16	H3k4me2	1vs<1	TSSS	0.00612792922780653	-6.35411860091194
chrX	67867511	67867769	+	STARD8	STARD8	H3k4me2	1vs<1	TSSS	0.000285708341961548	-10.9305098764606
chrX	24690687	24690979	-	PCYT1B	PCYT1B	H3k4me3	1vs<1	TSSS	2.53636808464539e-05	-14.7063828363397
chrX	67867511	67867769	+	STARD8	STARD8	H3k4me3	1vs<1	TSSS	0.000199399955399536	-10.577073743203
chrX	153775004	153775233	-	G6PD	G6PD	H3k4me3	1vs<1	TSSS	0.00366580464295861	-6.11873715669001
chrX	154114409	154114577	-	F8	F8	H3k4me3	1vs<1	TSSS	0	-Inf
chrX	15518900	15519063	+	BMX	BMX	H3k9ac	1vs<1	TSSS	0	-Inf
chrX	24690687	24690979	-	PCYT1B	PCYT1B	H3k9ac	1vs<1	TSSS	0	-Inf
chrX	66763874	66766604	+	AR	AR	H3k9ac	1vs<1	TSSS	0.0414015803575549	-5.18002677397572
chrX	67867511	67867769	+	STARD8	STARD8	H3k9ac	1vs<1	TSSS	0.000477978357239935	-8.92346951562896
chrX	119737744	119738102	+	MCTS1	MCTS1	H3k9ac	1vs<1	TSSS	0.00766220369712435	5.25238528118727
chrX	153775004	153775233	-	G6PD	G6PD	H3k9ac	1vs<1	TSSS	0.00127951719709584	-7.3506295037779
chrX	66763874	66766604	+	AR	AR	H3k9me1	1vs<1	TSSS	0	-Inf
chrX	15518900	15519063	+	BMX	BMX	H3k27ac	1vs<1	TSSS	0.0156187731764438	-9.9075013776508
chrX	24690687	24690979	-	PCYT1B	PCYT1B	H3k27ac	1vs<1	TSSS	0	-Inf
chrX	67867511	67867769	+	STARD8	STARD8	H3k27ac	1vs<1	TSSS	0.000583467766277837	-8.24096043767516
chrX	102631268	102631541	+	NGFRAP1	NGFRAP1	H3k27ac	1vs<1	TSSS	0.010380890399522	-5.14988267291377
chrX	119737744	119738102	+	MCTS1	MCTS1	H3k27ac	1vs<1	TSSS	0.0015926532599095	6.87947169511931
chrX	153775004	153775233	-	G6PD	G6PD	H3k27ac	1vs<1	TSSS	0.000933093871942165	-7.5785599332797
chrX	154114409	154114577	-	F8	F8	H3k27ac	1vs<1	TSSS	0	-Inf
chrX	69672155	69672605	+	DLG3	DLG3	H3k27me3	1vs<1	TSSS	2.49937241125197e-05	-14.0420946131835
chrX	15518900	15519063	+	BMX	BMX	H3k79me2	1vs<1	TSSS	0	-Inf
chrX	153775004	153775233	-	G6PD	G6PD	H3k79me2	1vs<1	TSSS	0.000194250532483983	-10.6706787157407
chrX	67867511	67867769	+	STARD8	STARD8	H2az	1vs<1	TSSS	0.0111896414066568	-5.43882223531424
chrX	105969894	105970627	+	RNF128	RNF128	H2az	1vs<1	TSSS	0.0118505177789774	9.45074632149285
chrX	107682588	107682704	-	COL4A6	COL4A6	H2az	1vs<1	TSSS	0.0140108353462851	-5.48465254414344
chrX	119737744	119738102	+	MCTS1	MCTS1	H2az	1vs<1	TSSS	0.00225742340994128	7.63305884842151
chrX	147582139	147582664	+	AFF2	AFF2	H2az	1vs<1	TSSS	0.0336912190972913	4.33415256342526
chrX	153775004	153775233	-	G6PD	G6PD	H2az	1vs<1	TSSS	0.0151663469076472	-4.99090969684554
chrY	2803112	2803487	+	ZFY	ZFY	H3k9ac	1vs<1	TSSS	0.00346699695172905	-11.9045520945962
chrY	2803112	2803487	+	ZFY	ZFY	H3k27ac	1vs<1	TSSS	0.00667228040324068	-9.32825363281393

## Sheet: H1hesc
Chr	Start	End	Strand	GeneID	GeneName	Histone	Comparison	SplicingOrTsss	PVal	Statistic
chr1	48694775	48694849	+	SLC5A9	SLC5A9	H3k4me1	0vs>0	SPLICING	0	-Inf
chr1	100733056	100733094	+	RTCD1	RTCD1	H3k4me1	0vs>0	SPLICING	5.91577978145117e-05	-11.8009560797937
chr1	22351299	22351448	-	HSPC157	HSPC157	H3k4me1	1vs<1	SPLICING	0.000414788917150478	-10.2177396223278
chr1	110037142	110037245	+	CYB561D1	CYB561D1	H3k4me1	1vs<1	SPLICING	0.0125685917799042	-5.17924865449768
chr1	204946809	204946853	+	NFASC	NFASC	H3k4me1	1vs<1	SPLICING	0	-Inf
chr1	221912276	221913129	-	DUSP10	DUSP10	H3k4me1	1vs<1	SPLICING	0.0360473013715983	4.33357221234451
chr1	1355432	1355972	-	LOC441869	LOC441869	H3k4me2	0vs>0	SPLICING	0.00505777671072279	-6.23310405755633
chr1	100733056	100733094	+	RTCD1	RTCD1	H3k4me2	0vs>0	SPLICING	0.00170973673297817	-6.95590014579597
chr1	161008341	161008463	-	TSTD1	TSTD1	H3k4me2	0vs>0	SPLICING	0.0330178431417737	4.29867202177919
chr1	206810220	206810313	+	DYRK3	DYRK3	H3k4me2	0vs>0	SPLICING	0.000650725421193526	-9.07077551169305
chr1	242012414	242012518	+	EXO1	EXO1	H3k4me2	0vs>0	SPLICING	0.000135435533198062	10.0808060291634
chr1	1560371	1560565	+	MIB2	MIB2	H3k4me2	1vs<1	SPLICING	0	-Inf
chr1	39338690	39338762	-	GJA9	GJA9	H3k4me2	1vs<1	SPLICING	0.0484989379526993	-4.22748263823806
chr1	1355432	1355972	-	LOC441869	LOC441869	H3k4me3	0vs>0	SPLICING	0.0272040908937846	-4.27988738960257
chr1	161008341	161008463	-	TSTD1	TSTD1	H3k4me3	0vs>0	SPLICING	0.0309190465642511	4.13080468016872
chr1	228295678	228295785	-	MRPL55	MRPL55	H3k4me3	0vs>0	SPLICING	0.00691690095786169	-5.2589178137488
chr1	242012414	242012518	+	EXO1	EXO1	H3k4me3	0vs>0	SPLICING	0.00307753412516794	6.21420234832465
chr1	110037142	110037245	+	CYB561D1	CYB561D1	H3k4me3	1vs<1	SPLICING	0.00352022412191156	-6.3295860350757
chr1	9943763	9943796	-	CTNNBIP1	CTNNBIP1	H3k9ac	0vs>0	SPLICING	0	-Inf
chr1	161008341	161008463	-	TSTD1	TSTD1	H3k9ac	0vs>0	SPLICING	0.043679056248524	3.90290957302874
chr1	228295678	228295785	-	MRPL55	MRPL55	H3k9ac	0vs>0	SPLICING	0	-Inf
chr1	242012414	242012518	+	EXO1	EXO1	H3k9ac	0vs>0	SPLICING	0.0408499425088318	3.78529018782519
chr1	16782313	16782388	+	NECAP2	NECAP2	H3k9ac	1vs<1	SPLICING	0	-Inf
chr1	39338690	39338762	-	GJA9	GJA9	H3k9ac	1vs<1	SPLICING	0.02877907140648	-4.25217482204
chr1	68151708	68151809	+	GADD45A	GADD45A	H3k9ac	1vs<1	SPLICING	0.0419177712542415	-3.85748792533555
chr1	110037765	110037802	+	CYB561D1	CYB561D1	H3k9ac	1vs<1	SPLICING	0	-Inf
chr1	156203419	156203519	+	BGLAP	BGLAP	H3k9ac	1vs<1	SPLICING	0.0363381786577301	-3.97957026171027
chr1	43642792	43642882	+	WDR65	WDR65	H3k9me3	0vs1	SPLICING	0	-Inf
chr1	156202111	156202216	+	BGLAP	BGLAP	H3k9me3	1vs<1	SPLICING	0	-Inf
chr1	43642792	43642882	+	WDR65	WDR65	H4k20me1	0vs1	SPLICING	6.65453825406267e-05	-8.78210973506676
chr1	42789355	42789498	-	FOXJ3	FOXJ3	H4k20me1	0vs>0	SPLICING	0.0441255280595896	-3.99700150024125
chr1	100733056	100733094	+	RTCD1	RTCD1	H4k20me1	0vs>0	SPLICING	0	-Inf
chr1	228295678	228295785	-	MRPL55	MRPL55	H4k20me1	0vs>0	SPLICING	0	-Inf
chr1	17312958	17313127	-	ATP13A2	ATP13A2	H4k20me1	1vs<1	SPLICING	0	-Inf
chr1	155650207	155650247	-	YY1AP1	YY1AP1	H4k20me1	1vs<1	SPLICING	0.00694760527748056	-5.52696547932342
chr1	221912276	221913129	-	DUSP10	DUSP10	H4k20me1	1vs<1	SPLICING	0.0164608457428168	4.74040868606143
chr1	68947729	68948580	-	DEPDC1	DEPDC1	H3k27ac	0vs>0	SPLICING	0	-Inf
chr1	150978577	150978723	-	FAM63A	FAM63A	H3k27ac	0vs>0	SPLICING	0.033068994904788	-4.0014116072799
chr1	22351299	22351448	-	HSPC157	HSPC157	H3k27ac	1vs<1	SPLICING	0.000272898921202602	10.5007494573331
chr1	68151708	68151809	+	GADD45A	GADD45A	H3k27ac	1vs<1	SPLICING	0.0274451792940503	-4.3721482297044
chr1	110037142	110037245	+	CYB561D1	CYB561D1	H3k27ac	1vs<1	SPLICING	0.000498976159182066	-8.33849726250988
chr1	182638759	182638887	-	RGS8	RGS8	H3k27me3	0vs1	SPLICING	0	-Inf
chr1	17939553	17939669	+	ARHGEF10L	ARHGEF10L	H3k27me3	0vs>0	SPLICING	0.000336198770307791	-8.85666158998186
chr1	6522923	6523030	-	PLEKHG5	PLEKHG5	H3k27me3	1vs<1	SPLICING	0	-Inf
chr1	156195348	156195459	+	BGLAP	BGLAP	H3k36me3	0vs>0	SPLICING	0	-Inf
chr1	1560371	1560565	+	MIB2	MIB2	H3k36me3	1vs<1	SPLICING	0	-Inf
chr1	16782313	16782388	+	NECAP2	NECAP2	H3k36me3	1vs<1	SPLICING	0.00393115760026011	-6.87689228527865
chr1	156203419	156203519	+	BGLAP	BGLAP	H3k36me3	1vs<1	SPLICING	2.89351210323709e-05	-14.2831773439354
chr1	221912276	221913129	-	DUSP10	DUSP10	H3k36me3	1vs<1	SPLICING	0.00726970346174398	6.12096572135184
chr1	1690540	1690682	-	NADK	NADK	H3k79me2	0vs>0	SPLICING	0.0202019040002317	4.4461280411098
chr1	42781017	42781126	-	FOXJ3	FOXJ3	H3k79me2	0vs>0	SPLICING	0.0375796961954899	-3.93669672056477
chr1	42789355	42789498	-	FOXJ3	FOXJ3	H3k79me2	0vs>0	SPLICING	0.0149249966148305	-4.69730143493097
chr1	100733056	100733094	+	RTCD1	RTCD1	H3k79me2	0vs>0	SPLICING	0.00246065810272267	-6.58357087248405
chr1	1560371	1560565	+	MIB2	MIB2	H3k79me2	1vs<1	SPLICING	0	-Inf
chr1	39338690	39338762	-	GJA9	GJA9	H3k79me2	1vs<1	SPLICING	0.0344834919914891	-4.31784194817034
chr1	44437059	44437742	+	DPH2	DPH2	H3k79me2	1vs<1	SPLICING	0.0250837238157608	4.50352147295859
chr1	93576102	93576183	+	MTF2	MTF2	H3k79me2	1vs<1	SPLICING	0.0267959181495856	-4.36624943480283
chr1	110037142	110037245	+	CYB561D1	CYB561D1	H3k79me2	1vs<1	SPLICING	0	-Inf
chr1	155650207	155650247	-	YY1AP1	YY1AP1	H3k79me2	1vs<1	SPLICING	0.0250837238157608	-4.4674428053076
chr1	221912276	221913129	-	DUSP10	DUSP10	H3k79me2	1vs<1	SPLICING	0.00414628489583826	6.24590478058657
chr1	43642792	43642882	+	WDR65	WDR65	H2az	0vs1	SPLICING	0	-Inf
chr1	176197321	176197385	+	XLOC_001101	XLOC_001101	H2az	0vs1	SPLICING	0	-Inf
chr1	1355432	1355972	-	LOC441869	LOC441869	H2az	0vs>0	SPLICING	0.00333197800459359	-6.46136293436403
chr1	161008341	161008463	-	TSTD1	TSTD1	H2az	0vs>0	SPLICING	0.0275564751488988	4.30904587386137
chr1	1560371	1560565	+	MIB2	MIB2	H2az	1vs<1	SPLICING	0	-Inf
chr1	68151708	68151809	+	GADD45A	GADD45A	H2az	1vs<1	SPLICING	0.00802974816511447	-5.09115521768293
chr1	110037142	110037245	+	CYB561D1	CYB561D1	H2az	1vs<1	SPLICING	0.00333370148598797	-5.99489393126604
chr1	32716840	32716972	+	LCK	LCK	H3k4me1	1vs<1	TSSS	0.0173307874159802	-5.6947079580266
chr1	112106468	112106597	-	ADORA3	ADORA3	H3k4me1	1vs<1	TSSS	0	-Inf
chr1	183559975	183560056	-	NCF2	NCF2	H3k4me1	1vs<1	TSSS	0	-Inf
chr1	1550795	1551013	+	MIB2	MIB2	H3k4me2	1vs<1	TSSS	0.00901694775130897	-5.94627793088153
chr1	21995747	21995856	-	RAP1GAP	RAP1GAP	H3k4me2	1vs<1	TSSS	0.0321172455944597	4.38027870457731
chr1	31885963	31886151	+	SERINC2	SERINC2	H3k4me2	1vs<1	TSSS	0.00492880617008588	6.79057034166454
chr1	32716840	32716972	+	LCK	LCK	H3k4me2	1vs<1	TSSS	0	-Inf
chr1	45805571	45805629	-	MUTYH	MUTYH	H3k4me2	1vs<1	TSSS	0.0111172886078853	-5.59609226561054
chr1	86043667	86044046	-	DDAH1	DDAH1	H3k4me2	1vs<1	TSSS	0.0211777814301658	5.18562283766235
chr1	113249700	113250025	-	RHOC	RHOC	H3k4me2	1vs<1	TSSS	0.0234487708253388	-4.71275716140167
chr1	156675501	156675608	-	CRABP2	CRABP2	H3k4me2	1vs<1	TSSS	0.00982417451749914	5.7968015481444
chr1	182360814	182361341	-	GLUL	GLUL	H3k4me2	1vs<1	TSSS	0.0234487708253388	4.72117040144818
chr1	183559975	183560056	-	NCF2	NCF2	H3k4me2	1vs<1	TSSS	0.0475925077332093	-4.1347567221074
chr1	235491869	235492093	+	GGPS1	GGPS1	H3k4me2	1vs<1	TSSS	0.0208568277708634	-4.87336508151114
chr1	1447910	1448070	+	ATAD3A	ATAD3A	H3k4me3	1vs<1	TSSS	0.0146087791836257	-4.72434731262411
chr1	1550795	1551013	+	MIB2	MIB2	H3k4me3	1vs<1	TSSS	7.31841063521452e-05	-12.7205632676674
chr1	21671869	21672034	-	ECE1	ECE1	H3k4me3	1vs<1	TSSS	0.00561271063927245	-5.82255736181379
chr1	26146397	26146520	+	FAM54B	FAM54B	H3k4me3	1vs<1	TSSS	0.00424550206935859	-6.16064688034311
chr1	26438268	26438406	+	PDIK1L	PDIK1L	H3k4me3	1vs<1	TSSS	0.0128952539178867	-4.83657117607939
chr1	31885963	31886151	+	SERINC2	SERINC2	H3k4me3	1vs<1	TSSS	8.05937143254583e-06	17.2725115547313
chr1	32716840	32716972	+	LCK	LCK	H3k4me3	1vs<1	TSSS	0	-Inf
chr1	45805571	45805629	-	MUTYH	MUTYH	H3k4me3	1vs<1	TSSS	0.00282689995941908	-6.61323086954376
chr1	61542946	61543300	+	NFIA	NFIA	H3k4me3	1vs<1	TSSS	0.00561179468720507	5.83451449057586
chr1	84543745	84544054	+	PRKACB	PRKACB	H3k4me3	1vs<1	TSSS	0.0253362339350304	4.37048144294207
chr1	86043667	86044046	-	DDAH1	DDAH1	H3k4me3	1vs<1	TSSS	0.0073417227241946	5.90048933925068
chr1	91966404	91966505	+	CDC7	CDC7	H3k4me3	1vs<1	TSSS	0.0191842560242553	-4.44919808189291
chr1	92951571	92951628	-	GFI1	GFI1	H3k4me3	1vs<1	TSSS	0.024500997555194	4.17451404961749
chr1	108742578	108742974	-	SLC25A24	SLC25A24	H3k4me3	1vs<1	TSSS	0.00172360088008672	-7.44834106907951
chr1	113249700	113250025	-	RHOC	RHOC	H3k4me3	1vs<1	TSSS	0.000300344183926743	-10.0511695000089
chr1	179575362	179575395	+	TDRD5	TDRD5	H3k4me3	1vs<1	TSSS	0	-Inf
chr1	193074394	193074556	-	GLRX2	GLRX2	H3k4me3	1vs<1	TSSS	0.0362433357428279	3.78211609794517
chr1	201476198	201476387	-	CSRP1	CSRP1	H3k4me3	1vs<1	TSSS	0.00325204397930334	6.45007352782893
chr1	223900119	223900579	+	CAPN2	CAPN2	H3k4me3	1vs<1	TSSS	0.00020126694583969	-10.7499974975655
chr1	242687899	242687998	-	PLD5	PLD5	H3k4me3	1vs<1	TSSS	0	-Inf
chr1	1447910	1448070	+	ATAD3A	ATAD3A	H3k9ac	1vs<1	TSSS	0.00546272124861685	-5.63943702179289
chr1	1550795	1551013	+	MIB2	MIB2	H3k9ac	1vs<1	TSSS	0.000222944032788035	-10.1400951571327
chr1	21671869	21672034	-	ECE1	ECE1	H3k9ac	1vs<1	TSSS	0.00442594489577815	-5.8521497718945
chr1	26146397	26146520	+	FAM54B	FAM54B	H3k9ac	1vs<1	TSSS	8.16345705062911e-05	-12.0470389869956
chr1	26438268	26438406	+	PDIK1L	PDIK1L	H3k9ac	1vs<1	TSSS	0.0163778802420368	-4.48611690706821
chr1	31885963	31886151	+	SERINC2	SERINC2	H3k9ac	1vs<1	TSSS	0.000298200903246227	9.64510342411187
chr1	32716840	32716972	+	LCK	LCK	H3k9ac	1vs<1	TSSS	0.000561260592894152	-11.2712112888434
chr1	45805571	45805629	-	MUTYH	MUTYH	H3k9ac	1vs<1	TSSS	3.29979493121705e-05	-14.1215626072316
chr1	61542946	61543300	+	NFIA	NFIA	H3k9ac	1vs<1	TSSS	0.0179303346804403	4.39221281178018
chr1	86043667	86044046	-	DDAH1	DDAH1	H3k9ac	1vs<1	TSSS	0.0205646835360223	4.49042265593545
chr1	91487547	91487671	-	ZNF644	ZNF644	H3k9ac	1vs<1	TSSS	0.0366096824485984	5.72434644280297
chr1	91966404	91966505	+	CDC7	CDC7	H3k9ac	1vs<1	TSSS	0.000149327632479972	-10.917333199317
chr1	100315640	100315971	+	AGL	AGL	H3k9ac	1vs<1	TSSS	0.0181061639559349	-4.37616113721184
chr1	108742578	108742974	-	SLC25A24	SLC25A24	H3k9ac	1vs<1	TSSS	0.000344973024463952	-9.33048583889828
chr1	113249700	113250025	-	RHOC	RHOC	H3k9ac	1vs<1	TSSS	1.64795825041255e-05	-15.6687568935675
chr1	223900119	223900579	+	CAPN2	CAPN2	H3k9ac	1vs<1	TSSS	0.000178151890206558	-10.5882665570507
chr1	21995747	21995856	-	RAP1GAP	RAP1GAP	H3k9me3	1vs<1	TSSS	0	-Inf
chr1	108742578	108742974	-	SLC25A24	SLC25A24	H3k9me3	1vs<1	TSSS	0	-Inf
chr1	154841508	154842754	-	KCNN3	KCNN3	H3k9me3	1vs<1	TSSS	0	-Inf
chr1	223900119	223900579	+	CAPN2	CAPN2	H3k9me3	1vs<1	TSSS	0	-Inf
chr1	1550795	1551013	+	MIB2	MIB2	H4k20me1	1vs<1	TSSS	0	-Inf
chr1	1447910	1448070	+	ATAD3A	ATAD3A	H3k27ac	1vs<1	TSSS	0.00769038495145134	-5.18897634260504
chr1	1550795	1551013	+	MIB2	MIB2	H3k27ac	1vs<1	TSSS	3.13674891608628e-05	-13.665901092122
chr1	21671869	21672034	-	ECE1	ECE1	H3k27ac	1vs<1	TSSS	0.00165895002587565	-6.83813453004895
chr1	26146397	26146520	+	FAM54B	FAM54B	H3k27ac	1vs<1	TSSS	3.0972321056757e-05	-13.7642112288901
chr1	26438268	26438406	+	PDIK1L	PDIK1L	H3k27ac	1vs<1	TSSS	0.0203957900873128	-4.27012188317289
chr1	32716840	32716972	+	LCK	LCK	H3k27ac	1vs<1	TSSS	6.08874889181252e-05	-18.0782376478051
chr1	45805571	45805629	-	MUTYH	MUTYH	H3k27ac	1vs<1	TSSS	0.000612189442737337	-8.32214041504233
chr1	61542946	61543300	+	NFIA	NFIA	H3k27ac	1vs<1	TSSS	0.00123445885428764	7.17479642153031
chr1	91966404	91966505	+	CDC7	CDC7	H3k27ac	1vs<1	TSSS	6.08874889181252e-05	-12.2357765845933
chr1	108742578	108742974	-	SLC25A24	SLC25A24	H3k27ac	1vs<1	TSSS	7.51319230930071e-05	-11.8429713600168
chr1	113249700	113250025	-	RHOC	RHOC	H3k27ac	1vs<1	TSSS	5.81819107129625e-06	-17.4960145351019
chr1	156786467	156786640	-	SH2D2A	SH2D2A	H3k27ac	1vs<1	TSSS	0.00149796835161375	8.74140121102677
chr1	223900119	223900579	+	CAPN2	CAPN2	H3k27ac	1vs<1	TSSS	0.000849849353911086	-7.72159576434047
chr1	17308009	17308081	-	MFAP2	MFAP2	H3k27me3	1vs<1	TSSS	0	-Inf
chr1	1447910	1448070	+	ATAD3A	ATAD3A	H3k79me2	1vs<1	TSSS	0.025731320190417	4.78289102903314
chr1	32716840	32716972	+	LCK	LCK	H3k79me2	1vs<1	TSSS	0	-Inf
chr1	64058947	64059405	+	PGM1	PGM1	H3k79me2	1vs<1	TSSS	0.0498580968935037	-4.56826337652206
chr1	113249700	113250025	-	RHOC	RHOC	H3k79me2	1vs<1	TSSS	0.000543887438485511	-9.17910461188971
chr1	156675501	156675608	-	CRABP2	CRABP2	H3k79me2	1vs<1	TSSS	0	-Inf
chr1	182360814	182361341	-	GLUL	GLUL	H3k79me2	1vs<1	TSSS	0.0280077698783225	4.6140382823014
chr1	1550795	1551013	+	MIB2	MIB2	H2az	1vs<1	TSSS	0.00505515876574499	-6.36156595216068
chr1	32716840	32716972	+	LCK	LCK	H2az	1vs<1	TSSS	0.0121548891117136	-6.48257630822279
chr1	33207512	33207790	+	KIAA1522	KIAA1522	H2az	1vs<1	TSSS	0.0475039754575926	3.77066514983115
chr1	44496978	44497134	-	SLC6A9	SLC6A9	H2az	1vs<1	TSSS	0.0328463715282458	4.64284278946523
chr1	45805571	45805629	-	MUTYH	MUTYH	H2az	1vs<1	TSSS	0.0441164961708835	-3.89837671446812
chr1	113249700	113250025	-	RHOC	RHOC	H2az	1vs<1	TSSS	0.0162488945867122	-5.0965298602648
chr1	183559975	183560056	-	NCF2	NCF2	H2az	1vs<1	TSSS	0.0225559405623525	-4.86971583121449
chr1	215178885	215179298	+	KCNK2	KCNK2	H2az	1vs<1	TSSS	0.0466883097105372	4.77013585898455
chr1	223900119	223900579	+	CAPN2	CAPN2	H2az	1vs<1	TSSS	0.02069860487691	-4.72788722041581
chr10	100221507	100221576	-	HPSE2	HPSE2	H3k4me1	0vs>0	SPLICING	0	-Inf
chr10	69648640	69648881	+	SIRT1	SIRT1	H3k4me1	1vs<1	SPLICING	0	-Inf
chr10	60760106	60760263	+	XLOC_003145	XLOC_003145	H3k4me2	0vs>0	SPLICING	0	-Inf
chr10	71692316	71692360	+	COL13A1	COL13A1	H3k4me2	0vs>0	SPLICING	0	-Inf
chr10	76971240	76971417	+	VDAC2	VDAC2	H3k4me2	0vs>0	SPLICING	0.0360427147681432	-4.03764328344195
chr10	13340187	13340245	-	PHYH	PHYH	H3k4me2	1vs<1	SPLICING	0	-Inf
chr10	99508026	99508121	+	ZFYVE27	ZFYVE27	H3k4me2	1vs<1	SPLICING	0	-Inf
chr10	71658453	71658518	+	COL13A1	COL13A1	H3k4me3	0vs>0	SPLICING	0	-Inf
chr10	103347003	103347163	-	POLL	POLL	H3k4me3	1vs<1	SPLICING	0.00363036418222209	-6.25090280156012
chr10	103346879	103346957	-	POLL	POLL	H3k9ac	0vs>0	SPLICING	0.00831134630173926	-5.12044533884916
chr10	62547818	62547988	+	CDK1	CDK1	H3k9ac	1vs<1	SPLICING	0.000748615148481779	-7.81382631610915
chr10	71902424	71902609	-	TYSND1	TYSND1	H3k9ac	1vs<1	SPLICING	0	-Inf
chr10	103347003	103347163	-	POLL	POLL	H3k9ac	1vs<1	SPLICING	0.0137447152686665	-4.79950948981587
chr10	90767457	90767594	+	FAS	FAS	H3k9me1	1vs<1	SPLICING	0	-Inf
chr10	71902424	71902609	-	TYSND1	TYSND1	H3k9me3	1vs<1	SPLICING	0	-Inf
chr10	71658453	71658518	+	COL13A1	COL13A1	H4k20me1	0vs>0	SPLICING	0	-Inf
chr10	71692316	71692360	+	COL13A1	COL13A1	H4k20me1	0vs>0	SPLICING	0	-Inf
chr10	71902424	71902609	-	TYSND1	TYSND1	H4k20me1	1vs<1	SPLICING	0.0127077350866267	-4.96401392969346
chr10	73111319	73111545	+	SLC29A3	SLC29A3	H4k20me1	1vs<1	SPLICING	0	-Inf
chr10	60760106	60760263	+	XLOC_003145	XLOC_003145	H3k27ac	0vs>0	SPLICING	0	-Inf
chr10	75599297	75599359	-	CAMK2G	CAMK2G	H3k27ac	0vs>0	SPLICING	0	-Inf
chr10	103346879	103346957	-	POLL	POLL	H3k27ac	0vs>0	SPLICING	0	-Inf
chr10	62547818	62547988	+	CDK1	CDK1	H3k27ac	1vs<1	SPLICING	0	-Inf
chr10	103347003	103347163	-	POLL	POLL	H3k27ac	1vs<1	SPLICING	0.00291722157486594	-6.38335660864409
chr10	129913192	129914271	-	MKI67	MKI67	H3k27ac	1vs<1	SPLICING	0	-Inf
chr10	24831812	24833410	+	KIAA1217	KIAA1217	H3k27me3	0vs>0	SPLICING	0	-Inf
chr10	71692316	71692360	+	COL13A1	COL13A1	H3k27me3	0vs>0	SPLICING	0	-Inf
chr10	71700744	71700779	+	COL13A1	COL13A1	H3k27me3	0vs>0	SPLICING	0	-Inf
chr10	13340187	13340245	-	PHYH	PHYH	H3k27me3	1vs<1	SPLICING	0	-Inf
chr10	73111319	73111545	+	SLC29A3	SLC29A3	H3k27me3	1vs<1	SPLICING	0	-Inf
chr10	114849159	114849299	+	TCF7L2	TCF7L2	H3k36me3	0vs>0	SPLICING	0	-Inf
chr10	35467817	35467914	+	CREM	CREM	H3k36me3	1vs<1	SPLICING	0	-Inf
chr10	71902424	71902609	-	TYSND1	TYSND1	H3k36me3	1vs<1	SPLICING	0.0243596275204834	-4.74564542330257
chr10	71903598	71903728	-	TYSND1	TYSND1	H3k36me3	1vs<1	SPLICING	0	-Inf
chr10	99508026	99508121	+	ZFYVE27	ZFYVE27	H3k36me3	1vs<1	SPLICING	0.0358411573800635	-4.43415923897138
chr10	27060004	27060018	-	ABI1	ABI1	H3k79me2	0vs>0	SPLICING	0	-Inf
chr10	114849159	114849299	+	TCF7L2	TCF7L2	H3k79me2	0vs>0	SPLICING	0	-Inf
chr10	13340187	13340245	-	PHYH	PHYH	H3k79me2	1vs<1	SPLICING	0	-Inf
chr10	27065994	27066170	-	ABI1	ABI1	H3k79me2	1vs<1	SPLICING	0.0427459099552783	-4.11367657441086
chr10	35437296	35437419	+	CREM	CREM	H3k79me2	1vs<1	SPLICING	0.0152825877844754	-5.04078634133499
chr10	62547818	62547988	+	CDK1	CDK1	H3k79me2	1vs<1	SPLICING	0.029756380097176	-4.25640541856369
chr10	71903598	71903728	-	TYSND1	TYSND1	H3k79me2	1vs<1	SPLICING	0.0312271348629931	-4.17567158712123
chr10	99508026	99508121	+	ZFYVE27	ZFYVE27	H3k79me2	1vs<1	SPLICING	0.00113647530230577	-7.76438488029658
chr10	103347003	103347163	-	POLL	POLL	H3k79me2	1vs<1	SPLICING	0.0185287243749693	-4.86367875773652
chr10	129913192	129914271	-	MKI67	MKI67	H3k79me2	1vs<1	SPLICING	0.0266416993136936	-4.38732402352563
chr10	24831812	24833410	+	KIAA1217	KIAA1217	H2az	0vs>0	SPLICING	0	-Inf
chr10	69425299	69425416	-	CTNNA3	CTNNA3	H3k4me1	1vs<1	TSSS	0	-Inf
chr10	83637443	83637776	+	NRG3	NRG3	H3k4me1	1vs<1	TSSS	0	-Inf
chr10	99393762	99393913	-	MORN4	MORN4	H3k4me1	1vs<1	TSSS	0.00113592810755927	-7.80619192361835
chr10	7708766	7708961	-	ITIH5	ITIH5	H3k4me2	1vs<1	TSSS	0.0290210061257875	-4.46826463749249
chr10	44144250	44144326	-	ZNF32	ZNF32	H3k4me2	1vs<1	TSSS	0.0208568277708634	-4.88033483021257
chr10	69425299	69425416	-	CTNNA3	CTNNA3	H3k4me2	1vs<1	TSSS	0	-Inf
chr10	83637443	83637776	+	NRG3	NRG3	H3k4me2	1vs<1	TSSS	0	-Inf
chr10	90750696	90751147	-	ACTA2	ACTA2	H3k4me2	1vs<1	TSSS	0.0196867403466392	-4.96955739386046
chr10	7708766	7708961	-	ITIH5	ITIH5	H3k4me3	1vs<1	TSSS	0.000465743982540614	-9.31170110539306
chr10	13341968	13342130	-	PHYH	PHYH	H3k4me3	1vs<1	TSSS	0.00105428404652068	-8.10719369766756
chr10	27530988	27531068	-	ACBD5	ACBD5	H3k4me3	1vs<1	TSSS	0.00222812840365114	-7.03582740591249
chr10	44144250	44144326	-	ZNF32	ZNF32	H3k4me3	1vs<1	TSSS	0.00547895115998068	-5.8798595481994
chr10	62761157	62761198	-	RHOBTB1	RHOBTB1	H3k4me3	1vs<1	TSSS	0	-Inf
chr10	69644427	69644909	+	SIRT1	SIRT1	H3k4me3	1vs<1	TSSS	0.000342824676265472	-9.82972631797496
chr10	83637443	83637776	+	NRG3	NRG3	H3k4me3	1vs<1	TSSS	0	-Inf
chr10	105845481	105845638	-	COL17A1	COL17A1	H3k4me3	1vs<1	TSSS	0.00614409711038698	-6.19010426571809
chr10	126848888	126849103	-	CTBP2	CTBP2	H3k4me3	1vs<1	TSSS	0.0466034961854929	3.54782297097435
chr10	7708766	7708961	-	ITIH5	ITIH5	H3k9ac	1vs<1	TSSS	0	-Inf
chr10	13341968	13342130	-	PHYH	PHYH	H3k9ac	1vs<1	TSSS	0.000414162189764746	-8.97933260305134
chr10	27530988	27531068	-	ACBD5	ACBD5	H3k9ac	1vs<1	TSSS	0.000314197906856496	-9.51146691476655
chr10	44144250	44144326	-	ZNF32	ZNF32	H3k9ac	1vs<1	TSSS	0.00891875138788041	-5.11029746522385
chr10	69644427	69644909	+	SIRT1	SIRT1	H3k9ac	1vs<1	TSSS	0.000491625060657383	-8.68313637325659
chr10	81664654	81664805	+	LOC100288974	LOC100288974	H3k9ac	1vs<1	TSSS	0.0457361470931336	3.74852798628433
chr10	88728188	88728362	+	AGAP11	AGAP11	H3k9ac	1vs<1	TSSS	0.00803636614990826	-5.26883162342235
chr10	103603253	103603677	-	KCNIP2	KCNIP2	H3k9ac	1vs<1	TSSS	0.0143062019681015	-4.63868895195188
chr10	104613967	104614184	+	AS3MT	AS3MT	H3k9ac	1vs<1	TSSS	0.0149836930567001	4.59148420105876
chr10	105845481	105845638	-	COL17A1	COL17A1	H3k9ac	1vs<1	TSSS	0.002603190761318	-7.10623523901225
chr10	112678879	112679124	-	BBIP1	BBIP1	H3k9ac	1vs<1	TSSS	0.0179303346804403	4.51600375547576
chr10	126848888	126849103	-	CTBP2	CTBP2	H3k9ac	1vs<1	TSSS	0.0200823433715788	4.27572811522722
chr10	69644427	69644909	+	SIRT1	SIRT1	H4k20me1	1vs<1	TSSS	0	-Inf
chr10	13341968	13342130	-	PHYH	PHYH	H3k27ac	1vs<1	TSSS	0.000788534051006748	-7.92575998486409
chr10	27530988	27531068	-	ACBD5	ACBD5	H3k27ac	1vs<1	TSSS	5.05525609873766e-06	-17.9368753173292
chr10	31608101	31608221	+	ZEB1	ZEB1	H3k27ac	1vs<1	TSSS	0.00860396749887153	-5.42169031143375
chr10	44144250	44144326	-	ZNF32	ZNF32	H3k27ac	1vs<1	TSSS	0.00123445885428764	-7.19378697160348
chr10	69644427	69644909	+	SIRT1	SIRT1	H3k27ac	1vs<1	TSSS	0.000200477741470045	-10.1892393492813
chr10	88728188	88728362	+	AGAP11	AGAP11	H3k27ac	1vs<1	TSSS	0.013950660331064	-4.61073807798771
chr10	105845481	105845638	-	COL17A1	COL17A1	H3k27ac	1vs<1	TSSS	0.00202347793833959	-7.27736345031919
chr10	62149183	62149488	-	ANK3	ANK3	H3k27me3	1vs<1	TSSS	0	-Inf
chr10	33247073	33247293	-	ITGB1	ITGB1	H3k79me2	1vs<1	TSSS	0.00266726459529286	-7.20135364415306
chr10	105845481	105845638	-	COL17A1	COL17A1	H3k79me2	1vs<1	TSSS	0.0174041773883206	-5.53870412197407
chr10	21462694	21463116	-	NEBL	NEBL	H2az	1vs<1	TSSS	0.0187015237649744	5.65941194746733
chr10	33247073	33247293	-	ITGB1	ITGB1	H2az	1vs<1	TSSS	0.00247741384919296	-7.4140937422341
chr10	69644427	69644909	+	SIRT1	SIRT1	H2az	1vs<1	TSSS	0.0039872306165578	-6.67569326783606
chr10	81664654	81664805	+	LOC100288974	LOC100288974	H2az	1vs<1	TSSS	0.0103534299409559	6.13166976107126
chr10	83637443	83637776	+	NRG3	NRG3	H2az	1vs<1	TSSS	0	-Inf
chr10	129705325	129705573	+	PTPRE	PTPRE	H2az	1vs<1	TSSS	0.0413627718868539	-4.18327080474782
chr11	44165797	44165889	+	EXT2	EXT2	H3k4me1	0vs>0	SPLICING	0	-Inf
chr11	58877013	58877179	+	FAM111B	FAM111B	H3k4me1	0vs>0	SPLICING	6.84740506792225e-05	-11.4892425662532
chr11	85340176	85340306	+	TMEM126B	TMEM126B	H3k4me1	0vs>0	SPLICING	0	-Inf
chr11	104763624	104763718	-	CASP12	CASP12	H3k4me1	0vs>0	SPLICING	0	-Inf
chr11	129992200	129992408	+	APLP2	APLP2	H3k4me1	1vs<1	SPLICING	0.000586487046032299	-9.5301549664997
chr11	6494314	6494478	-	TRIM3	TRIM3	H3k4me2	0vs>0	SPLICING	0.010379853542925	-5.10829694988904
chr11	44165797	44165889	+	EXT2	EXT2	H3k4me2	0vs>0	SPLICING	0	-Inf
chr11	104763624	104763718	-	CASP12	CASP12	H3k4me2	0vs>0	SPLICING	0	-Inf
chr11	6494314	6494478	-	TRIM3	TRIM3	H3k4me3	0vs>0	SPLICING	0.0342579184108843	-3.83110436510481
chr11	46387794	46388534	+	DGKZ	DGKZ	H3k4me3	0vs>0	SPLICING	0	-Inf
chr11	61719243	61719430	+	BEST1	BEST1	H3k4me3	0vs>0	SPLICING	0	-Inf
chr11	6494314	6494478	-	TRIM3	TRIM3	H3k9ac	0vs>0	SPLICING	0.00215129751618686	-6.58474534950562
chr11	71502785	71502865	+	FAM86C	FAM86C	H3k9ac	0vs>0	SPLICING	0	-Inf
chr11	85340176	85340306	+	TMEM126B	TMEM126B	H3k9ac	0vs>0	SPLICING	0.0129095546277919	4.74463174039518
chr11	104763624	104763718	-	CASP12	CASP12	H3k9ac	0vs>0	SPLICING	0	-Inf
chr11	64806044	64806301	+	ARL2	ARL2	H3k9ac	1vs<1	SPLICING	0	-Inf
chr11	64891974	64892124	+	MRPL49	MRPL49	H3k9ac	1vs<1	SPLICING	0.0151536890715865	-4.69808726436078
chr11	71712247	71712370	+	IL18BP	IL18BP	H3k9me1	1vs<1	SPLICING	0	-Inf
chr11	6494314	6494478	-	TRIM3	TRIM3	H3k9me3	0vs>0	SPLICING	0	-Inf
chr11	46387794	46388534	+	DGKZ	DGKZ	H3k9me3	0vs>0	SPLICING	0	-Inf
chr11	6494314	6494478	-	TRIM3	TRIM3	H4k20me1	0vs>0	SPLICING	0	-Inf
chr11	44165797	44165889	+	EXT2	EXT2	H4k20me1	0vs>0	SPLICING	0	-Inf
chr11	61719243	61719430	+	BEST1	BEST1	H4k20me1	0vs>0	SPLICING	0	-Inf
chr11	44165797	44165889	+	EXT2	EXT2	H3k27ac	0vs>0	SPLICING	0	-Inf
chr11	61719243	61719430	+	BEST1	BEST1	H3k27ac	0vs>0	SPLICING	0.00517210840041211	-6.75417591831562
chr11	104763624	104763718	-	CASP12	CASP12	H3k27ac	0vs>0	SPLICING	0	-Inf
chr11	70267576	70267686	+	CTTN	CTTN	H3k27me3	0vs>0	SPLICING	0	-Inf
chr11	118402865	118403176	+	TMEM25	TMEM25	H3k27me3	1vs<1	SPLICING	0	-Inf
chr11	43339971	43340032	+	API5	API5	H3k36me3	0vs>0	SPLICING	0.0210211721264742	-4.97030399845012
chr11	82595865	82595927	-	PRCP	PRCP	H3k36me3	0vs>0	SPLICING	0	-Inf
chr11	43339971	43340032	+	API5	API5	H3k79me2	0vs>0	SPLICING	0.0101038695059674	-5.09642012702339
chr11	118276372	118276424	+	ATP5L	ATP5L	H3k79me2	0vs>0	SPLICING	0.0220020469744686	4.34396077016908
chr11	35201821	35201954	+	CD44	CD44	H3k79me2	1vs<1	SPLICING	0.0250837238157608	4.4729013433166
chr11	35223218	35223334	+	CD44	CD44	H3k79me2	1vs<1	SPLICING	0.0308598234936498	4.19908545670988
chr11	35232793	35232996	+	CD44	CD44	H3k79me2	1vs<1	SPLICING	0.0402136950318877	3.96480069450233
chr11	126141332	126141552	+	FOXRED1	FOXRED1	H3k79me2	1vs<1	SPLICING	0.0455449925481219	3.84966887860253
chr11	6494314	6494478	-	TRIM3	TRIM3	H2az	0vs>0	SPLICING	0.0051559425938009	-5.52538610979942
chr11	58877013	58877179	+	FAM111B	FAM111B	H2az	0vs>0	SPLICING	0	-Inf
chr11	104763624	104763718	-	CASP12	CASP12	H2az	0vs>0	SPLICING	0	-Inf
chr11	1874200	1874427	+	LSP1	LSP1	H3k4me1	1vs<1	TSSS	0	-Inf
chr11	2466221	2466714	+	KCNQ1	KCNQ1	H3k4me1	1vs<1	TSSS	0.00229704035874155	-7.71119615415259
chr11	31839357	31839509	-	PAX6	PAX6	H3k4me1	1vs<1	TSSS	0.00964598271382887	-5.39547607316488
chr11	33061561	33061752	+	TCP11L1	TCP11L1	H3k4me1	1vs<1	TSSS	0.0182511702868007	-4.78272127349611
chr11	44117099	44117402	+	EXT2	EXT2	H3k4me1	1vs<1	TSSS	0	-Inf
chr11	1874200	1874427	+	LSP1	LSP1	H3k4me2	1vs<1	TSSS	0.00558143029408997	-8.24023126753694
chr11	31839357	31839509	-	PAX6	PAX6	H3k4me2	1vs<1	TSSS	0.0203706761356587	-4.91673916284976
chr11	44117099	44117402	+	EXT2	EXT2	H3k4me2	1vs<1	TSSS	0.0184422844976773	-5.04859704868429
chr11	101983171	101983476	+	YAP1	YAP1	H3k4me2	1vs<1	TSSS	0.00816301964574793	6.69194368437381
chr11	118478306	118478414	+	PHLDB1	PHLDB1	H3k4me2	1vs<1	TSSS	0.0135025478605413	5.34659991820627
chr11	125756955	125757660	+	HYLS1	HYLS1	H3k4me2	1vs<1	TSSS	0.00389970247950202	7.25601288294598
chr11	1874200	1874427	+	LSP1	LSP1	H3k4me3	1vs<1	TSSS	0.00144891309963152	-9.98415709012085
chr11	8932701	8932770	+	C11orf17	C11orf17	H3k4me3	1vs<1	TSSS	0.0162296278337824	-4.62225541675818
chr11	30607589	30607930	-	MPPED2	MPPED2	H3k4me3	1vs<1	TSSS	0.044948044063079	-3.99914569489039
chr11	31839357	31839509	-	PAX6	PAX6	H3k4me3	1vs<1	TSSS	8.29830047387534e-05	-12.433883543203
chr11	33061561	33061752	+	TCP11L1	TCP11L1	H3k4me3	1vs<1	TSSS	0.00209105107134431	-7.11958887524984
chr11	46368956	46369370	+	DGKZ	DGKZ	H3k4me3	1vs<1	TSSS	0.00514549734934798	-5.94808883244935
chr11	61129205	61129755	-	CYBASC3	CYBASC3	H3k4me3	1vs<1	TSSS	0.00981883232243144	-5.14933598226063
chr11	64781585	64781744	+	ARL2	ARL2	H3k4me3	1vs<1	TSSS	0.00306538632486439	-6.52075799686593
chr11	101983171	101983476	+	YAP1	YAP1	H3k4me3	1vs<1	TSSS	0.00561179468720507	6.34690400769654
chr11	118478306	118478414	+	PHLDB1	PHLDB1	H3k4me3	1vs<1	TSSS	0.00247475141867835	6.78961289483193
chr11	121163388	121163525	+	SC5DL	SC5DL	H3k4me3	1vs<1	TSSS	0.0174858107986062	-4.53857037860915
chr11	125756955	125757660	+	HYLS1	HYLS1	H3k4me3	1vs<1	TSSS	0.000198432186599999	10.8338962137278
chr11	1874200	1874427	+	LSP1	LSP1	H3k9ac	1vs<1	TSSS	0.0111957130599979	-5.72735873317193
chr11	8932701	8932770	+	C11orf17	C11orf17	H3k9ac	1vs<1	TSSS	0.00250502871	-6.53966299578468
chr11	30607589	30607930	-	MPPED2	MPPED2	H3k9ac	1vs<1	TSSS	0	-Inf
chr11	46368956	46369370	+	DGKZ	DGKZ	H3k9ac	1vs<1	TSSS	0.000104054033296697	-11.6112356339099
chr11	61129205	61129755	-	CYBASC3	CYBASC3	H3k9ac	1vs<1	TSSS	0.00883746422177038	-5.12549094443037
chr11	64781585	64781744	+	ARL2	ARL2	H3k9ac	1vs<1	TSSS	0.000232388975066277	-10.046035015893
chr11	67141518	67141648	-	CLCF1	CLCF1	H3k9ac	1vs<1	TSSS	0.00814092676543642	5.24372539656777
chr11	101983171	101983476	+	YAP1	YAP1	H3k9ac	1vs<1	TSSS	0.00880498080764629	5.51832519997483
chr11	125756955	125757660	+	HYLS1	HYLS1	H3k9ac	1vs<1	TSSS	0.00250502871	6.53483151067064
chr11	61129205	61129755	-	CYBASC3	CYBASC3	H3k9me3	1vs<1	TSSS	0	-Inf
chr11	9786904	9787083	-	LOC440028	LOC440028	H4k20me1	1vs<1	TSSS	0	-Inf
chr11	1874200	1874427	+	LSP1	LSP1	H3k27ac	1vs<1	TSSS	0.0150326260966171	-5.26973517562701
chr11	8932701	8932770	+	C11orf17	C11orf17	H3k27ac	1vs<1	TSSS	0.00262046927131423	-6.32986586615534
chr11	46368956	46369370	+	DGKZ	DGKZ	H3k27ac	1vs<1	TSSS	0.000338869815963689	-9.23533291713499
chr11	57195016	57195053	-	SLC43A3	SLC43A3	H3k27ac	1vs<1	TSSS	0.0493135277471814	3.54261687984029
chr11	58345492	58345639	-	LPXN	LPXN	H3k27ac	1vs<1	TSSS	0.00390079922511883	-5.92236127184936
chr11	61129205	61129755	-	CYBASC3	CYBASC3	H3k27ac	1vs<1	TSSS	0.00545721721063335	-5.52571768166686
chr11	64781585	64781744	+	ARL2	ARL2	H3k27ac	1vs<1	TSSS	0.000226139397693196	-9.95204106528282
chr11	67141518	67141648	-	CLCF1	CLCF1	H3k27ac	1vs<1	TSSS	0.0048496135657889	5.63557519299011
chr11	101983171	101983476	+	YAP1	YAP1	H3k27ac	1vs<1	TSSS	0.0239272129964755	4.35209529974969
chr11	125756955	125757660	+	HYLS1	HYLS1	H3k27ac	1vs<1	TSSS	0.000482844468512832	8.64539843425594
chr11	2466221	2466714	+	KCNQ1	KCNQ1	H3k27me3	1vs<1	TSSS	0.00156570500698398	-8.68157050001503
chr11	1874200	1874427	+	LSP1	LSP1	H3k79me2	1vs<1	TSSS	0.0449667919247615	-4.79161240143025
chr11	61129205	61129755	-	CYBASC3	CYBASC3	H3k79me2	1vs<1	TSSS	0.0263929386388184	-4.73578805264255
chr11	101983171	101983476	+	YAP1	YAP1	H3k79me2	1vs<1	TSSS	0.0100057093224124	6.35106898630234
chr11	2466221	2466714	+	KCNQ1	KCNQ1	H2az	1vs<1	TSSS	0.0112895913845267	-5.98306525341693
chr11	30607589	30607930	-	MPPED2	MPPED2	H2az	1vs<1	TSSS	0.0244424278027968	-5.20070609309246
chr11	31839357	31839509	-	PAX6	PAX6	H2az	1vs<1	TSSS	0.00391110829363602	-6.71832482371477
chr11	46368956	46369370	+	DGKZ	DGKZ	H2az	1vs<1	TSSS	0.0210128987658765	-4.70594004629117
chr11	61129205	61129755	-	CYBASC3	CYBASC3	H2az	1vs<1	TSSS	0.0444677082705707	-3.87841105560948
chr11	66725793	66725847	-	PC	PC	H2az	1vs<1	TSSS	0.00352915324715341	6.89565735722795
chr11	118478306	118478414	+	PHLDB1	PHLDB1	H2az	1vs<1	TSSS	0.0170047648687296	5.04649250579129
chr11	125756955	125757660	+	HYLS1	HYLS1	H2az	1vs<1	TSSS	0.00419504408054561	6.60352107403457
chr12	319371	319734	-	SLC6A12	SLC6A12	H3k4me1	0vs>0	SPLICING	0.00106201203497433	-12.5701067693104
chr12	10279170	10279307	-	CLEC7A	CLEC7A	H3k4me1	0vs>0	SPLICING	0	-Inf
chr12	58186769	58186856	+	TSFM	TSFM	H3k4me1	1vs<1	SPLICING	0	-Inf
chr12	319371	319734	-	SLC6A12	SLC6A12	H3k4me2	0vs>0	SPLICING	0	-Inf
chr12	10279170	10279307	-	CLEC7A	CLEC7A	H3k4me2	0vs>0	SPLICING	0	-Inf
chr12	319371	319734	-	SLC6A12	SLC6A12	H3k4me3	0vs>0	SPLICING	0	-Inf
chr12	10279170	10279307	-	CLEC7A	CLEC7A	H3k4me3	0vs>0	SPLICING	0	-Inf
chr12	48743829	48744001	-	ZNF641	ZNF641	H3k4me3	0vs>0	SPLICING	0.0130602753751338	-4.64663425792112
chr12	42631401	42631526	-	YAF2	YAF2	H3k4me3	1vs<1	SPLICING	0.00460826086989856	-5.98734351911662
chr12	46863936	46864045	+	XLOC_006011	XLOC_006011	H3k4me3	1vs<1	SPLICING	0	-Inf
chr12	56391399	56391507	+	SUOX	SUOX	H3k4me3	1vs<1	SPLICING	0.0309580941495404	-4.29202706249246
chr12	319371	319734	-	SLC6A12	SLC6A12	H3k9ac	0vs>0	SPLICING	0	-Inf
chr12	48743829	48744001	-	ZNF641	ZNF641	H3k9ac	0vs>0	SPLICING	0.00459772157138249	-5.7056845532372
chr12	42631401	42631526	-	YAF2	YAF2	H3k9ac	1vs<1	SPLICING	0.000438584815671784	-8.53123371950727
chr12	56391399	56391507	+	SUOX	SUOX	H3k9ac	1vs<1	SPLICING	0.00665625595430477	-5.41446460307392
chr12	98989211	98989335	+	SLC25A3	SLC25A3	H3k9me1	0vs>0	SPLICING	0	-Inf
chr12	48096471	48096629	-	RPAP3	RPAP3	H3k9me1	1vs<1	SPLICING	0	-Inf
chr12	42631401	42631526	-	YAF2	YAF2	H3k9me3	1vs<1	SPLICING	0	-Inf
chr12	56096835	56096962	-	ITGA7	ITGA7	H3k9me3	1vs<1	SPLICING	0	-Inf
chr12	319371	319734	-	SLC6A12	SLC6A12	H4k20me1	0vs>0	SPLICING	0	-Inf
chr12	56095163	56095200	-	ITGA7	ITGA7	H4k20me1	0vs>0	SPLICING	0	-Inf
chr12	58186769	58186856	+	TSFM	TSFM	H4k20me1	1vs<1	SPLICING	0	-Inf
chr12	110760797	110760877	+	ATP2A2	ATP2A2	H4k20me1	1vs<1	SPLICING	0	-Inf
chr12	113822656	113822751	+	PLBD2	PLBD2	H4k20me1	1vs<1	SPLICING	0	-Inf
chr12	319371	319734	-	SLC6A12	SLC6A12	H3k27ac	0vs>0	SPLICING	0.00312509001869158	-8.97438297848207
chr12	48743829	48744001	-	ZNF641	ZNF641	H3k27ac	0vs>0	SPLICING	0.000241987738073306	-9.06132624965257
chr12	514677	514730	+	CCDC77	CCDC77	H3k27ac	1vs<1	SPLICING	0	-Inf
chr12	42631401	42631526	-	YAF2	YAF2	H3k27ac	1vs<1	SPLICING	8.41737472431076e-05	-11.0190610543515
chr12	114204880	114205013	-	XLOC_007128	XLOC_007128	H3k27me3	1vs<1	SPLICING	0	-Inf
chr12	2974521	2974565	-	FOXM1	FOXM1	H3k36me3	0vs>0	SPLICING	0	-Inf
chr12	10279170	10279307	-	CLEC7A	CLEC7A	H3k36me3	0vs>0	SPLICING	0	-Inf
chr12	514677	514730	+	CCDC77	CCDC77	H3k36me3	1vs<1	SPLICING	0	-Inf
chr12	99074055	99074180	+	APAF1	APAF1	H3k36me3	1vs<1	SPLICING	0.0484757711469006	-4.19478519410347
chr12	110760797	110760877	+	ATP2A2	ATP2A2	H3k36me3	1vs<1	SPLICING	0.000951303087996025	-8.59736595829868
chr12	10279170	10279307	-	CLEC7A	CLEC7A	H3k79me2	0vs>0	SPLICING	0	-Inf
chr12	48743829	48744001	-	ZNF641	ZNF641	H3k79me2	0vs>0	SPLICING	0.0035987580265207	-6.09106630839129
chr12	514677	514730	+	CCDC77	CCDC77	H3k79me2	1vs<1	SPLICING	0.000880529431039398	-8.14285910270329
chr12	42631401	42631526	-	YAF2	YAF2	H3k79me2	1vs<1	SPLICING	0.0279070418054367	-4.31970833064647
chr12	110760797	110760877	+	ATP2A2	ATP2A2	H3k79me2	1vs<1	SPLICING	0.0483913521566595	-3.79410919884689
chr12	25705805	25705923	-	IFLTD1	IFLTD1	H2az	0vs>0	SPLICING	0	-Inf
chr12	25679033	25679152	-	IFLTD1	IFLTD1	H2az	1vs<1	SPLICING	0	-Inf
chr12	39727014	39727082	-	KIF21A	KIF21A	H2az	1vs<1	SPLICING	0	-Inf
chr12	42631401	42631526	-	YAF2	YAF2	H2az	1vs<1	SPLICING	0.022190978565918	-4.21826872801574
chr12	46863936	46864045	+	XLOC_006011	XLOC_006011	H2az	1vs<1	SPLICING	4.08712409530828e-06	-15.3698170904905
chr12	56096835	56096962	-	ITGA7	ITGA7	H2az	1vs<1	SPLICING	0	-Inf
chr12	42983267	42983572	-	PRICKLE1	PRICKLE1	H3k4me1	1vs<1	TSSS	0	-Inf
chr12	42983267	42983572	-	PRICKLE1	PRICKLE1	H3k4me2	1vs<1	TSSS	0.000832523238577288	-10.79540872359
chr12	53440810	53440847	+	TENC1	TENC1	H3k4me2	1vs<1	TSSS	0.0325052445154269	-4.30300456252209
chr12	54673792	54673915	-	CBX5	CBX5	H3k4me2	1vs<1	TSSS	0.0418809552200349	4.69645162580194
chr12	56101261	56101686	-	ITGA7	ITGA7	H3k4me2	1vs<1	TSSS	0.0418809552200349	4.05441094388668
chr12	49961831	49961911	-	MCRS1	MCRS1	H3k4me3	1vs<1	TSSS	0.0437041425979631	-3.6135115145598
chr12	51985020	51985143	+	SCN8A	SCN8A	H3k4me3	1vs<1	TSSS	0.0333739849634495	3.87677347824833
chr12	108732804	108733094	-	CMKLR1	CMKLR1	H3k4me3	1vs<1	TSSS	0.00637606573054847	-6.84383085970378
chr12	51611426	51611477	-	POU6F1	POU6F1	H3k9ac	1vs<1	TSSS	0.0457361470931336	3.58390324687084
chr12	51664040	51664202	-	SMAGP	SMAGP	H3k9ac	1vs<1	TSSS	0.00311789575157625	-6.24293883951125
chr12	53613734	53614150	-	RARG	RARG	H3k9ac	1vs<1	TSSS	0.0364840356634627	3.7691091147865
chr12	54020063	54020199	-	ATF7	ATF7	H3k9ac	1vs<1	TSSS	0.000260881100813423	-9.85525481312635
chr12	108732804	108733094	-	CMKLR1	CMKLR1	H3k9ac	1vs<1	TSSS	0.0085147159283264	-6.17021099751044
chr12	120703420	120703563	-	PXN	PXN	H3k9ac	1vs<1	TSSS	0.00149710256444309	7.62477396156922
chr12	6486418	6486523	-	SCNN1A	SCNN1A	H3k27ac	1vs<1	TSSS	0.0448287309217532	-4.45139350085585
chr12	51664040	51664202	-	SMAGP	SMAGP	H3k27ac	1vs<1	TSSS	0.00212214292308903	-6.56177143913303
chr12	53613734	53614150	-	RARG	RARG	H3k27ac	1vs<1	TSSS	0.00436013907365714	5.76845063183208
chr12	54020063	54020199	-	ATF7	ATF7	H3k27ac	1vs<1	TSSS	0.000794105631404636	-7.88344611272903
chr12	108732804	108733094	-	CMKLR1	CMKLR1	H3k27ac	1vs<1	TSSS	0.000442156937021795	-11.8450555787718
chr12	42983267	42983572	-	PRICKLE1	PRICKLE1	H3k27me3	1vs<1	TSSS	0	-Inf
chr12	50677203	50677353	-	LIMA1	LIMA1	H2az	1vs<1	TSSS	0.000164657326194806	11.6524559529532
chr12	53613734	53614150	-	RARG	RARG	H2az	1vs<1	TSSS	0.000448833884516272	9.98274047584358
chr13	21141809	21141924	+	IFT88	IFT88	H3k4me3	0vs>0	SPLICING	0.00805862783000176	5.10536084147653
chr13	76381616	76382335	+	LMO7	LMO7	H3k9me1	0vs>0	SPLICING	0	-Inf
chr13	39608268	39608333	-	C13orf23	C13orf23	H3k9me1	1vs<1	SPLICING	0	-Inf
chr13	41031651	41032805	-	LOC646982	LOC646982	H3k27me3	0vs>0	SPLICING	0.000771436359727828	-8.74512735178589
chr13	39608268	39608333	-	C13orf23	C13orf23	H3k36me3	1vs<1	SPLICING	0	-Inf
chr13	103459496	103460095	+	BIVM	BIVM	H3k79me2	1vs<1	SPLICING	0.00317602375959884	6.56091350626542
chr13	21141809	21141924	+	IFT88	IFT88	H2az	0vs>0	SPLICING	0.00257407337606331	6.3085228947746
chr13	21142024	21142136	+	IFT88	IFT88	H2az	0vs>0	SPLICING	0.0217396098289831	4.32710628073861
chr13	37005967	37006303	+	CCNA1	CCNA1	H3k4me1	1vs<1	TSSS	0.0168481659464291	-6.59206121804286
chr13	76194570	76196004	+	LMO7	LMO7	H3k4me1	1vs<1	TSSS	0.000409577616404946	-9.24071181745633
chr13	76194570	76196004	+	LMO7	LMO7	H3k4me2	1vs<1	TSSS	0.00886734949403319	-6.000990673557
chr13	114566806	114567046	-	GAS6	GAS6	H3k4me2	1vs<1	TSSS	0.0247589793431047	4.63569299031145
chr13	30881468	30881584	-	KATNAL1	KATNAL1	H3k4me3	1vs<1	TSSS	0.0289072375255507	-4.01660427748626
chr13	76194570	76196004	+	LMO7	LMO7	H3k4me3	1vs<1	TSSS	0	-Inf
chr13	30881468	30881584	-	KATNAL1	KATNAL1	H3k9ac	1vs<1	TSSS	0.0149836930567001	-4.59046765517645
chr13	79980444	79980612	+	XLOC_007472	XLOC_007472	H3k9ac	1vs<1	TSSS	0.00234151210423369	-6.63701912280711
chr13	114566806	114567046	-	GAS6	GAS6	H3k9ac	1vs<1	TSSS	0.0108217659777138	4.92517675884202
chr13	30881468	30881584	-	KATNAL1	KATNAL1	H3k27ac	1vs<1	TSSS	0.0136745178121836	-4.63259460763002
chr13	79980444	79980612	+	XLOC_007472	XLOC_007472	H3k27ac	1vs<1	TSSS	0.00796557596665411	-5.14521242648027
chr13	24144723	24144987	+	TNFRSF19	TNFRSF19	H2az	1vs<1	TSSS	0.0471384018448722	3.98123406858711
chr13	114566806	114567046	-	GAS6	GAS6	H2az	1vs<1	TSSS	0.0471384018448722	3.79352003948915
chr14	62036262	62036395	-	XLOC_008663	XLOC_008663	H3k4me1	1vs<1	SPLICING	0.0070346982865922	-6.90398871328275
chr14	104153418	104153548	+	KLC1	KLC1	H4k20me1	1vs<1	SPLICING	4.80008000037491e-05	-11.4880380229723
chr14	105960172	105960270	+	C14orf80	C14orf80	H4k20me1	1vs<1	SPLICING	0.00026015694913962	-9.08137352657534
chr14	104153418	104153548	+	KLC1	KLC1	H3k27ac	1vs<1	SPLICING	0.000493990717045367	-8.39912758549458
chr14	55251058	55251165	+	SAMD4A	SAMD4A	H3k36me3	0vs>0	SPLICING	0.00388334101422699	-6.6345386518965
chr14	50141068	50141145	-	POLE2	POLE2	H3k36me3	1vs<1	SPLICING	0.000855721688024424	-8.78124954981266
chr14	56117287	56117355	+	KTN1	KTN1	H3k36me3	1vs<1	SPLICING	2.69144717577293e-05	-14.5467274965437
chr14	102661275	102661457	+	WDR20	WDR20	H3k36me3	1vs<1	SPLICING	0.0110153604584672	-5.69465939645071
chr14	54868242	54868297	+	CDKN3	CDKN3	H3k79me2	1vs<1	SPLICING	0	-Inf
chr14	55251058	55251165	+	SAMD4A	SAMD4A	H2az	0vs>0	SPLICING	9.49604344467077e-05	-10.2933953744202
chr14	23450470	23451848	-	JUB	JUB	H3k4me1	1vs<1	TSSS	0.0231689895913292	-4.57006339975683
chr14	69658194	69658308	+	EXD2	EXD2	H3k4me2	1vs<1	TSSS	0.00973726183125393	-5.83307300889599
chr14	35099317	35099366	-	SNX6	SNX6	H3k4me3	1vs<1	TSSS	0.0073417227241946	-5.48252563880755
chr14	69658194	69658308	+	EXD2	EXD2	H3k4me3	1vs<1	TSSS	0.0128952539178867	-4.8419219137912
chr14	105957586	105957859	+	C14orf80	C14orf80	H3k4me3	1vs<1	TSSS	0.0224234976879152	-4.31172725919803
chr14	23450470	23451848	-	JUB	JUB	H3k9ac	1vs<1	TSSS	0.0200823433715788	4.27193974317489
chr14	24458027	24458284	+	DHRS4L2	DHRS4L2	H3k9ac	1vs<1	TSSS	0.0135161867227114	-4.69553486891012
chr14	35099317	35099366	-	SNX6	SNX6	H3k9ac	1vs<1	TSSS	0.00402602113401044	-5.94630884254883
chr14	105957586	105957859	+	C14orf80	C14orf80	H3k9ac	1vs<1	TSSS	0.00267476812037871	-6.43300232008849
chr14	23450470	23451848	-	JUB	JUB	H3k27ac	1vs<1	TSSS	0.0107779092383434	4.84457482201531
chr14	35099317	35099366	-	SNX6	SNX6	H3k27ac	1vs<1	TSSS	0.000903715758820751	-7.63853171554348
chr14	55034637	55034830	+	SAMD4A	SAMD4A	H3k27ac	1vs<1	TSSS	0.0451344107195331	3.61476908752736
chr14	94759526	94759596	-	SERPINA10	SERPINA10	H3k27ac	1vs<1	TSSS	0	-Inf
chr14	105957586	105957859	+	C14orf80	C14orf80	H3k27ac	1vs<1	TSSS	0.000345659627487304	-9.18188113785378
chr14	23450470	23451848	-	JUB	JUB	H3k27me3	1vs<1	TSSS	0.00259332811399892	-7.12845287187739
chr14	23651973	23652849	-	SLC7A8	SLC7A8	H3k27me3	1vs<1	TSSS	0.0241802032338139	-4.92559014933865
chr14	23450470	23451848	-	JUB	JUB	H3k79me2	1vs<1	TSSS	0.0224105623338831	4.92026446398464
chr14	39736328	39736726	+	CTAGE5	CTAGE5	H3k79me2	1vs<1	TSSS	0.041281747327267	4.29885599083411
chr15	41667910	41668026	+	NUSAP1	NUSAP1	H3k4me1	1vs<1	SPLICING	0	-Inf
chr15	60682412	60682516	-	ANXA2	ANXA2	H3k4me2	0vs>0	SPLICING	0.0470289889264471	3.74002525151183
chr15	60689457	60689537	-	ANXA2	ANXA2	H3k4me2	0vs>0	SPLICING	0.0124032228579901	4.90964156214646
chr15	60689457	60689537	-	ANXA2	ANXA2	H3k4me3	0vs>0	SPLICING	0.000126340636087167	10.0813115513445
chr15	60689457	60689537	-	ANXA2	ANXA2	H3k9ac	0vs>0	SPLICING	0.0144067798393297	4.61719617775171
chr15	40998375	40998492	+	RAD51	RAD51	H3k9ac	1vs<1	SPLICING	0	-Inf
chr15	73567033	73567065	+	NEO1	NEO1	H3k9ac	1vs<1	SPLICING	0	-Inf
chr15	44867100	44867239	-	SPG11	SPG11	H3k9me1	1vs<1	SPLICING	0	-Inf
chr15	65140792	65140941	+	PLEKHO2	PLEKHO2	H3k9me3	1vs<1	SPLICING	0	-Inf
chr15	60689457	60689537	-	ANXA2	ANXA2	H3k27ac	0vs>0	SPLICING	0.000208277186691839	9.3060454282735
chr15	41667910	41668026	+	NUSAP1	NUSAP1	H3k27ac	1vs<1	SPLICING	0	-Inf
chr15	30011981	30012220	-	TJP1	TJP1	H3k36me3	0vs>0	SPLICING	0.0229364899156397	4.86426971113116
chr15	40998375	40998492	+	RAD51	RAD51	H3k36me3	1vs<1	SPLICING	0.000155898382759481	-11.3675972769641
chr15	91434212	91434421	+	FES	FES	H3k79me2	0vs>0	SPLICING	0.0408878766333427	-3.8431875988349
chr15	41667910	41668026	+	NUSAP1	NUSAP1	H2az	1vs<1	SPLICING	0	-Inf
chr15	61521252	61521502	-	RORA	RORA	H3k4me3	1vs<1	TSSS	0.0331188025660262	3.90135612960907
chr15	66585920	66586073	+	DIS3L	DIS3L	H3k4me3	1vs<1	TSSS	0.00985385451398106	5.13791719644368
chr15	93426073	93426416	+	LOC100507217	LOC100507217	H3k4me3	1vs<1	TSSS	0.0105016379027696	-5.07791824286895
chr15	93632148	93632443	-	RGMA	RGMA	H3k4me3	1vs<1	TSSS	0.0224234976879152	4.55888739838369
chr15	48010686	48011070	+	SEMA6D	SEMA6D	H3k9ac	1vs<1	TSSS	0.00855315113552141	-6.15008694834271
chr15	76135622	76136187	+	UBE2Q2	UBE2Q2	H3k9ac	1vs<1	TSSS	0.0289159203181531	-3.95202663943275
chr15	93426073	93426416	+	LOC100507217	LOC100507217	H3k9ac	1vs<1	TSSS	0.000414162189764746	-8.99907827276398
chr15	79297059	79298002	-	RASGRF1	RASGRF1	H3k9me1	1vs<1	TSSS	0	-Inf
chr15	41576201	41576308	+	LOC729082	LOC729082	H3k27ac	1vs<1	TSSS	0.0156386523862666	4.50466883171813
chr15	48010686	48011070	+	SEMA6D	SEMA6D	H3k27ac	1vs<1	TSSS	0.00433663023812019	-7.04056216682514
chr15	66585920	66586073	+	DIS3L	DIS3L	H3k27ac	1vs<1	TSSS	0.0440376112979783	3.6512194074055
chr15	76135622	76136187	+	UBE2Q2	UBE2Q2	H3k27ac	1vs<1	TSSS	0.000389851304649215	-8.9786740069498
chr15	93426073	93426416	+	LOC100507217	LOC100507217	H3k27ac	1vs<1	TSSS	6.1728963991571e-06	-17.1999567303854
chr15	48010686	48011070	+	SEMA6D	SEMA6D	H3k79me2	1vs<1	TSSS	0.0174041773883206	-6.22617648400895
chr15	52043468	52043650	-	LYSMD2	LYSMD2	H2az	1vs<1	TSSS	0.000484856484118354	9.75431767918925
chr15	93426073	93426416	+	LOC100507217	LOC100507217	H2az	1vs<1	TSSS	0	-Inf
chr16	75298249	75298499	-	BCAR1	BCAR1	H3k4me1	0vs>0	SPLICING	0.00319861941974455	6.4355852571497
chr16	66860580	66860683	-	NAE1	NAE1	H3k4me1	1vs<1	SPLICING	0	-Inf
chr16	46919379	46919489	+	GPT2	GPT2	H3k4me2	0vs>0	SPLICING	0.0344345401403561	-4.24035868958523
chr16	75298249	75298499	-	BCAR1	BCAR1	H3k4me2	0vs>0	SPLICING	0.00199671243626334	6.71366210892495
chr16	1876508	1876603	-	HAGH	HAGH	H3k4me2	1vs<1	SPLICING	0.0185385470828466	-4.85900953631473
chr16	23668807	23668907	+	DCTN5	DCTN5	H3k4me3	0vs>0	SPLICING	0	-Inf
chr16	46919379	46919489	+	GPT2	GPT2	H3k4me3	0vs>0	SPLICING	0.0357745679673841	-3.97277047827433
chr16	75298249	75298499	-	BCAR1	BCAR1	H3k4me3	0vs>0	SPLICING	0.0130499339621569	4.67169238709814
chr16	1876508	1876603	-	HAGH	HAGH	H3k4me3	1vs<1	SPLICING	0.038631940660431	-4.0445958276424
chr16	50778641	50778777	+	CYLD	CYLD	H3k9ac	0vs>0	SPLICING	0.0175548079562804	-4.43914564576666
chr16	75298249	75298499	-	BCAR1	BCAR1	H3k9ac	0vs>0	SPLICING	0.00247406226571583	6.36839865827251
chr16	1876508	1876603	-	HAGH	HAGH	H3k9ac	1vs<1	SPLICING	0.0018895959238837	-6.68308967393349
chr16	23668807	23668907	+	DCTN5	DCTN5	H3k9me3	0vs>0	SPLICING	0	-Inf
chr16	75286133	75286296	-	BCAR1	BCAR1	H3k9me3	0vs>0	SPLICING	0	-Inf
chr16	75298249	75298499	-	BCAR1	BCAR1	H3k9me3	0vs>0	SPLICING	0	-Inf
chr16	87343903	87343939	-	LOC100506581	LOC100506581	H3k9me3	0vs>0	SPLICING	0	-Inf
chr16	981642	981793	-	LMF1	LMF1	H4k20me1	0vs>0	SPLICING	0	-Inf
chr16	1808149	1808160	+	MAPK8IP3	MAPK8IP3	H4k20me1	0vs>0	SPLICING	0	-Inf
chr16	23668807	23668907	+	DCTN5	DCTN5	H4k20me1	0vs>0	SPLICING	0	-Inf
chr16	66860580	66860683	-	NAE1	NAE1	H4k20me1	1vs<1	SPLICING	0	-Inf
chr16	1876508	1876603	-	HAGH	HAGH	H3k27ac	1vs<1	SPLICING	0.000325150416876873	-8.9482531813807
chr16	55883536	55883685	-	CES5A	CES5A	H3k27me3	0vs>0	SPLICING	0	-Inf
chr16	75286133	75286296	-	BCAR1	BCAR1	H3k27me3	0vs>0	SPLICING	0	-Inf
chr16	75298249	75298499	-	BCAR1	BCAR1	H3k27me3	0vs>0	SPLICING	0	-Inf
chr16	12798481	12798906	-	CPPED1	CPPED1	H3k27me3	1vs<1	SPLICING	0	-Inf
chr16	69680420	69680481	+	NFAT5	NFAT5	H3k36me3	0vs>0	SPLICING	0	-Inf
chr16	66860580	66860683	-	NAE1	NAE1	H3k36me3	1vs<1	SPLICING	0.00477990646232608	-6.61138386830779
chr16	75298249	75298499	-	BCAR1	BCAR1	H3k79me2	0vs>0	SPLICING	0.0141745370596825	4.75860226120679
chr16	87344756	87344902	-	LOC100506581	LOC100506581	H3k79me2	0vs>0	SPLICING	0	-Inf
chr16	66860580	66860683	-	NAE1	NAE1	H3k79me2	1vs<1	SPLICING	0.0025324436979192	-6.85261823995865
chr16	19422057	19422498	+	TMC5	TMC5	H3k4me1	1vs<1	TSSS	0.000666272838288393	-8.56087757180285
chr16	27413483	27413939	+	IL21R	IL21R	H3k4me1	1vs<1	TSSS	0.0040578850590874	-6.95140277415456
chr16	85646924	85647004	+	KIAA0182	KIAA0182	H3k4me1	1vs<1	TSSS	0.00103349261269391	-7.98106268006455
chr16	19422057	19422498	+	TMC5	TMC5	H3k4me2	1vs<1	TSSS	0.00824708708573032	-6.08922860113713
chr16	27413483	27413939	+	IL21R	IL21R	H3k4me2	1vs<1	TSSS	0.0323440285517719	-4.5737228285926
chr16	67260878	67260901	-	LRRC29	LRRC29	H3k4me2	1vs<1	TSSS	0.0286928230177253	-4.49620810805932
chr16	85646924	85647004	+	KIAA0182	KIAA0182	H3k4me2	1vs<1	TSSS	0.000904361814007087	9.2766308765485
chr16	19422057	19422498	+	TMC5	TMC5	H3k4me3	1vs<1	TSSS	0.015527777921959	-4.6631280981878
chr16	27413483	27413939	+	IL21R	IL21R	H3k4me3	1vs<1	TSSS	0.034788678670824	-4.0355941203018
chr16	28608318	28608391	-	SULT1A2	SULT1A2	H3k4me3	1vs<1	TSSS	0.0377786981099243	-3.74867510172377
chr16	67260878	67260901	-	LRRC29	LRRC29	H3k4me3	1vs<1	TSSS	0.0056823201011913	-5.80009643224544
chr16	69139467	69139690	+	HAS3	HAS3	H3k4me3	1vs<1	TSSS	0.0224234976879152	4.31714749225915
chr16	77224836	77225155	+	MON1B	MON1B	H3k4me3	1vs<1	TSSS	0.0073417227241946	-5.46697491534308
chr16	89627090	89627120	+	RPL13	RPL13	H3k4me3	1vs<1	TSSS	0.0476072268753962	-3.52265889779812
chr16	640077	640119	+	RAB40C	RAB40C	H3k9ac	1vs<1	TSSS	0	-Inf
chr16	1020788	1020984	-	LMF1	LMF1	H3k9ac	1vs<1	TSSS	0.0189457396380622	-4.33131844203396
chr16	11680742	11680806	-	LITAF	LITAF	H3k9ac	1vs<1	TSSS	0.0201528631722335	-4.26403180298069
chr16	28608318	28608391	-	SULT1A2	SULT1A2	H3k9ac	1vs<1	TSSS	0.00540657575873183	-5.65787272063215
chr16	51185077	51185183	-	SALL1	SALL1	H3k9ac	1vs<1	TSSS	0	-Inf
chr16	67260878	67260901	-	LRRC29	LRRC29	H3k9ac	1vs<1	TSSS	0.000212879755297396	-10.242465514191
chr16	72127266	72127539	-	TXNL4B	TXNL4B	H3k9ac	1vs<1	TSSS	0.0353803144300217	3.79890094925448
chr16	77224836	77225155	+	MON1B	MON1B	H3k9ac	1vs<1	TSSS	4.07790743937137e-05	-13.6481169897182
chr16	85646924	85647004	+	KIAA0182	KIAA0182	H3k9ac	1vs<1	TSSS	0.0192873905953692	4.31258975161194
chr16	89627090	89627120	+	RPL13	RPL13	H3k9ac	1vs<1	TSSS	0.0179303346804403	-4.39860053079535
chr16	28996147	28996248	+	LAT	LAT	H4k20me1	1vs<1	TSSS	0	-Inf
chr16	1020788	1020984	-	LMF1	LMF1	H3k27ac	1vs<1	TSSS	0.011506168899842	-4.78641909499068
chr16	11680742	11680806	-	LITAF	LITAF	H3k27ac	1vs<1	TSSS	0.000910672470361935	-7.61373779060109
chr16	51185077	51185183	-	SALL1	SALL1	H3k27ac	1vs<1	TSSS	0	-Inf
chr16	67260878	67260901	-	LRRC29	LRRC29	H3k27ac	1vs<1	TSSS	0.000688612271879573	-8.12353450667519
chr16	77224836	77225155	+	MON1B	MON1B	H3k27ac	1vs<1	TSSS	6.08874889181252e-05	-12.2283852644601
chr16	89627090	89627120	+	RPL13	RPL13	H3k27ac	1vs<1	TSSS	0.00482320940517584	-5.64930173289103
chr16	67001378	67001802	+	CES3	CES3	H3k27me3	1vs<1	TSSS	1.36890638066364e-05	-15.0976302874183
chr16	85646924	85647004	+	KIAA0182	KIAA0182	H3k27me3	1vs<1	TSSS	0	-Inf
chr16	72127266	72127539	-	TXNL4B	TXNL4B	H3k79me2	1vs<1	TSSS	0.0498580968935037	4.09369820702958
chr16	19422057	19422498	+	TMC5	TMC5	H2az	1vs<1	TSSS	0.00811844142394245	-5.90996127335999
chr16	27413483	27413939	+	IL21R	IL21R	H2az	1vs<1	TSSS	0.0121548891117136	-5.84896079633524
chr16	67260878	67260901	-	LRRC29	LRRC29	H2az	1vs<1	TSSS	0.000491092167158876	-9.67954061523578
chr16	69139467	69139690	+	HAS3	HAS3	H2az	1vs<1	TSSS	0.0162488945867122	5.12261124229715
chr16	85646924	85647004	+	KIAA0182	KIAA0182	H2az	1vs<1	TSSS	0.0108728634145445	-5.59278763301221
chr17	7536070	7536277	+	SHBG	SHBG	H3k4me1	0vs>0	SPLICING	0.000104730901002232	-10.7840948457534
chr17	43343617	43343885	+	LOC100133991	LOC100133991	H3k4me1	0vs>0	SPLICING	0.00050810772729585	-8.6584559632452
chr17	25630393	25630661	+	WSB1	WSB1	H3k4me1	1vs<1	SPLICING	0	-Inf
chr17	7536070	7536277	+	SHBG	SHBG	H3k4me2	0vs>0	SPLICING	0	-Inf
chr17	46677809	46677907	+	LOC404266	LOC404266	H3k4me2	1vs<1	SPLICING	0	-Inf
chr17	7536070	7536277	+	SHBG	SHBG	H3k4me3	0vs>0	SPLICING	0	-Inf
chr17	7536070	7536277	+	SHBG	SHBG	H3k9ac	0vs>0	SPLICING	0	-Inf
chr17	42148996	42149189	+	G6PC3	G6PC3	H3k9ac	0vs>0	SPLICING	0.00234232729585685	6.46153119371759
chr17	43343617	43343885	+	LOC100133991	LOC100133991	H3k9ac	0vs>0	SPLICING	0.000637747054696151	-7.93322998884041
chr17	19282209	19282445	+	MAPK7	MAPK7	H3k9ac	1vs<1	SPLICING	0.000855241022195382	-7.61978629622574
chr17	46677809	46677907	+	LOC404266	LOC404266	H3k9ac	1vs<1	SPLICING	0	-Inf
chr17	19186263	19187027	+	EPN2	EPN2	H3k9me1	1vs<1	SPLICING	0	-Inf
chr17	38504568	38504716	+	RARA	RARA	H3k9me1	1vs<1	SPLICING	0	-Inf
chr17	38024802	38024867	+	ZPBP2	ZPBP2	H3k9me3	0vs>0	SPLICING	0	-Inf
chr17	42544465	42544482	-	GPATCH8	GPATCH8	H3k9me3	0vs>0	SPLICING	0	-Inf
chr17	17796975	17797124	-	TOM1L2	TOM1L2	H3k9me3	1vs<1	SPLICING	0	-Inf
chr17	7536070	7536277	+	SHBG	SHBG	H4k20me1	0vs>0	SPLICING	0	-Inf
chr17	19282209	19282445	+	MAPK7	MAPK7	H4k20me1	1vs<1	SPLICING	2.10043140725243e-05	-12.9142599497253
chr17	27844471	27844674	+	TAOK1	TAOK1	H4k20me1	1vs<1	SPLICING	0	-Inf
chr17	27849298	27849537	+	TAOK1	TAOK1	H4k20me1	1vs<1	SPLICING	0	-Inf
chr17	7536070	7536277	+	SHBG	SHBG	H3k27ac	0vs>0	SPLICING	0	-Inf
chr17	43343617	43343885	+	LOC100133991	LOC100133991	H3k27ac	0vs>0	SPLICING	0.000356117240829476	-8.44640220039687
chr17	76212745	76212862	+	BIRC5	BIRC5	H3k27ac	0vs>0	SPLICING	0	-Inf
chr17	19282209	19282445	+	MAPK7	MAPK7	H3k27ac	1vs<1	SPLICING	0.00720154191642608	-5.4851261039115
chr17	17796975	17797124	-	TOM1L2	TOM1L2	H3k27me3	1vs<1	SPLICING	0	-Inf
chr17	17796975	17797124	-	TOM1L2	TOM1L2	H3k36me3	1vs<1	SPLICING	0.00609133146194716	-6.31476333983236
chr17	27844471	27844674	+	TAOK1	TAOK1	H3k36me3	1vs<1	SPLICING	0.0191138858206679	-5.06846168101675
chr17	27849298	27849537	+	TAOK1	TAOK1	H3k36me3	1vs<1	SPLICING	0.0115347344266373	-5.62830402523192
chr17	73170847	73170918	-	SUMO2	SUMO2	H3k36me3	1vs<1	SPLICING	0.0239400578789808	-4.77630050391853
chr17	7536070	7536277	+	SHBG	SHBG	H3k79me2	0vs>0	SPLICING	0	-Inf
chr17	73170847	73170918	-	SUMO2	SUMO2	H3k79me2	1vs<1	SPLICING	0.000318226703715799	-9.41774490349495
chr17	7536070	7536277	+	SHBG	SHBG	H2az	0vs>0	SPLICING	0.0179829719094575	-4.49548071898699
chr17	12487877	12488038	+	FLJ34690	FLJ34690	H2az	0vs>0	SPLICING	0	-Inf
chr17	19282209	19282445	+	MAPK7	MAPK7	H2az	1vs<1	SPLICING	0.0185319702998977	-4.37948910331211
chr17	7017934	7018128	-	ASGR2	ASGR2	H3k4me1	1vs<1	TSSS	0	-Inf
chr17	37894590	37894645	+	GRB7	GRB7	H3k4me2	1vs<1	TSSS	0.0115944330842755	-10.0509149082271
chr17	40169358	40169715	-	DNAJC7	DNAJC7	H3k4me2	1vs<1	TSSS	0.00901694775130897	-5.92314516484147
chr17	46178630	46178883	-	CBX1	CBX1	H3k4me2	1vs<1	TSSS	0.0135654272971631	-5.32800702566128
chr17	80186889	80186982	+	SLC16A3	SLC16A3	H3k4me2	1vs<1	TSSS	0.00816301964574793	-6.12212088802325
chr17	3796233	3796337	-	CAMKK1	CAMKK1	H3k4me3	1vs<1	TSSS	0.039453983265988	3.73704052544027
chr17	37894590	37894645	+	GRB7	GRB7	H3k4me3	1vs<1	TSSS	0.0182215660955688	-7.17325093573559
chr17	40169358	40169715	-	DNAJC7	DNAJC7	H3k4me3	1vs<1	TSSS	0.0191524229097774	-4.45679765336534
chr17	41623229	41623305	-	ETV4	ETV4	H3k4me3	1vs<1	TSSS	0.016284050639492	-4.91359855463128
chr17	43325303	43325370	+	LOC100133991	LOC100133991	H3k4me3	1vs<1	TSSS	0.0379106549798331	3.7418628585521
chr17	76124693	76124861	-	TMC6	TMC6	H3k4me3	1vs<1	TSSS	0.000175087643374129	11.1372435220708
chr17	80416540	80416706	+	NARF	NARF	H3k4me3	1vs<1	TSSS	0.00144891309963152	-7.70366112394311
chr17	40346411	40346550	-	GHDC	GHDC	H3k9ac	1vs<1	TSSS	0.000309263217173868	-9.5643800918175
chr17	41623229	41623305	-	ETV4	ETV4	H3k9ac	1vs<1	TSSS	0.00401634653360349	-6.48578724486828
chr17	47287806	47287936	-	GNGT2	GNGT2	H3k9ac	1vs<1	TSSS	0.0259594317146072	-5.13363792354544
chr17	64188115	64188212	-	CCDC46	CCDC46	H3k9ac	1vs<1	TSSS	4.1455920532797e-05	-16.1367791023062
chr17	76124693	76124861	-	TMC6	TMC6	H3k9ac	1vs<1	TSSS	0.0116353813725635	4.83945819565976
chr17	79869143	79869340	-	PCYT2	PCYT2	H3k9ac	1vs<1	TSSS	5.34475999975107e-06	-18.3931595316862
chr17	80186889	80186982	+	SLC16A3	SLC16A3	H3k9ac	1vs<1	TSSS	0.0455792105598105	3.59235217981665
chr17	80416540	80416706	+	NARF	NARF	H3k9ac	1vs<1	TSSS	0.000106905066630244	-11.5146913685383
chr17	4487276	4487393	+	SMTNL2	SMTNL2	H3k9me3	1vs<1	TSSS	0	-Inf
chr17	40346411	40346550	-	GHDC	GHDC	H3k27ac	1vs<1	TSSS	0.00698859001951829	-5.28443363609698
chr17	41623229	41623305	-	ETV4	ETV4	H3k27ac	1vs<1	TSSS	0.0160515382995276	-4.76011510403555
chr17	47287806	47287936	-	GNGT2	GNGT2	H3k27ac	1vs<1	TSSS	0.0150326260966171	-5.96374717111012
chr17	76124693	76124861	-	TMC6	TMC6	H3k27ac	1vs<1	TSSS	0.0459778768735732	3.59724474726424
chr17	79829174	79829282	-	ARHGDIA	ARHGDIA	H3k27ac	1vs<1	TSSS	0.0100125664566694	-4.91684100437121
chr17	79869143	79869340	-	PCYT2	PCYT2	H3k27ac	1vs<1	TSSS	6.1728963991571e-06	-17.1429750156503
chr17	80416540	80416706	+	NARF	NARF	H3k27ac	1vs<1	TSSS	0.000304339446043361	-9.43112064491092
chr17	76124693	76124861	-	TMC6	TMC6	H3k27me3	1vs<1	TSSS	0	-Inf
chr17	40169358	40169715	-	DNAJC7	DNAJC7	H3k79me2	1vs<1	TSSS	0.0449667919247615	-4.19365051192953
chr17	47287806	47287936	-	GNGT2	GNGT2	H3k79me2	1vs<1	TSSS	0	-Inf
chr17	7533453	7533601	+	SHBG	SHBG	H2az	1vs<1	TSSS	0	-Inf
chr17	8021804	8021860	-	ALOXE3	ALOXE3	H2az	1vs<1	TSSS	0.0466883097105372	4.01612037027169
chr17	41623229	41623305	-	ETV4	ETV4	H2az	1vs<1	TSSS	0.0251757291759146	-4.71493963146152
chr17	56296512	56296666	-	MKS1	MKS1	H2az	1vs<1	TSSS	0.000274363347606822	10.8104182147289
chr17	76124693	76124861	-	TMC6	TMC6	H2az	1vs<1	TSSS	0.0211627718773322	4.67996289417166
chr17	80416540	80416706	+	NARF	NARF	H2az	1vs<1	TSSS	0.00294595297940261	-7.13264583259936
chr18	77170403	77171501	+	NFATC1	NFATC1	H3k4me3	0vs1	SPLICING	0	-Inf
chr18	5293971	5294000	-	ZFP161	ZFP161	H3k4me3	1vs<1	SPLICING	5.71511349614595e-05	-11.5605685781432
chr18	5293971	5294000	-	ZFP161	ZFP161	H3k9ac	1vs<1	SPLICING	3.4874573260489e-05	-12.1499107449599
chr18	77170403	77171501	+	NFATC1	NFATC1	H3k9me3	0vs1	SPLICING	0.0225090011819077	-3.37196321878758
chr18	77170403	77171501	+	NFATC1	NFATC1	H3k27me3	0vs1	SPLICING	0	-Inf
chr18	77170403	77171501	+	NFATC1	NFATC1	H3k36me3	0vs1	SPLICING	0.0327682571531076	3.02699562773892
chr18	5293971	5294000	-	ZFP161	ZFP161	H3k79me2	1vs<1	SPLICING	5.02253735462518e-05	-12.6940872873598
chr18	77170403	77171501	+	NFATC1	NFATC1	H2az	0vs1	SPLICING	0	-Inf
chr18	21594384	21595002	+	TTC39C	TTC39C	H3k4me1	1vs<1	TSSS	0.00667081002530253	-5.82938403503575
chr18	24126692	24128500	-	KCTD1	KCTD1	H3k4me1	1vs<1	TSSS	0.00602763326590611	-5.96365743807242
chr18	21594384	21595002	+	TTC39C	TTC39C	H3k4me3	1vs<1	TSSS	0.00243496756836773	-6.88869637055095
chr18	42260863	42260986	+	SETBP1	SETBP1	H3k4me3	1vs<1	TSSS	0.039453983265988	-3.87863652456013
chr18	11689136	11689938	+	GNAL	GNAL	H3k9ac	1vs<1	TSSS	0.00122812209676461	8.18507886516499
chr18	21594384	21595002	+	TTC39C	TTC39C	H3k9ac	1vs<1	TSSS	0.00291469720064475	-6.32484218714252
chr18	21977619	21977790	-	OSBPL1A	OSBPL1A	H3k9ac	1vs<1	TSSS	0.0158141194260172	-4.82656191637696
chr18	32621324	32621625	+	MAPRE2	MAPRE2	H3k9ac	1vs<1	TSSS	0.016088043407954	4.51771209678219
chr18	24126692	24128500	-	KCTD1	KCTD1	H3k9me3	1vs<1	TSSS	0.0402700252357434	-4.76897263769528
chr18	31802954	31803515	-	NOL4	NOL4	H3k9me3	1vs<1	TSSS	0	-Inf
chr18	24126692	24128500	-	KCTD1	KCTD1	H4k20me1	1vs<1	TSSS	0.00317240051234919	-6.25124285455452
chr18	11689136	11689938	+	GNAL	GNAL	H3k27ac	1vs<1	TSSS	0.0136745178121836	6.64265762837633
chr18	21594384	21595002	+	TTC39C	TTC39C	H3k27ac	1vs<1	TSSS	0.00876510738561122	-5.03025735087047
chr18	21718955	21719082	+	CABYR	CABYR	H3k27ac	1vs<1	TSSS	0.0239272129964755	-4.36091547704921
chr18	21977619	21977790	-	OSBPL1A	OSBPL1A	H3k27ac	1vs<1	TSSS	0.0239272129964755	-4.35718294727443
chr18	32621324	32621625	+	MAPRE2	MAPRE2	H3k27ac	1vs<1	TSSS	0.00433663023812019	5.79677306796257
chr18	24126692	24128500	-	KCTD1	KCTD1	H3k27me3	1vs<1	TSSS	0	-Inf
chr18	21594384	21595002	+	TTC39C	TTC39C	H3k79me2	1vs<1	TSSS	0.00778720760056819	-6.11562948627319
chr18	24126692	24128500	-	KCTD1	KCTD1	H3k79me2	1vs<1	TSSS	0.0265505259693568	4.70488490207675
chr19	18548409	18548570	-	ISYNA1	ISYNA1	H3k4me1	0vs>0	SPLICING	0.0046473095024168	-5.99190696403834
chr19	7832402	7832514	+	CLEC4M	CLEC4M	H3k4me1	1vs<1	SPLICING	0	-Inf
chr19	8369915	8370040	-	CD320	CD320	H3k4me1	1vs<1	SPLICING	0.000441861007586217	-8.86194423842917
chr19	8434103	8434216	+	ANGPTL4	ANGPTL4	H3k4me1	1vs<1	SPLICING	0	-Inf
chr19	47731415	47731703	-	BBC3	BBC3	H3k4me1	1vs<1	SPLICING	0.0038258517230212	-6.30678619507736
chr19	58695288	58695365	+	ZNF274	ZNF274	H3k4me1	1vs<1	SPLICING	0.00084400133928638	-7.95893354857478
chr19	18547783	18547915	-	ISYNA1	ISYNA1	H3k4me2	0vs>0	SPLICING	0.00167739327932929	7.02384237068972
chr19	18548409	18548570	-	ISYNA1	ISYNA1	H3k4me2	0vs>0	SPLICING	0.00224601808400965	6.5593444639916
chr19	49309774	49309974	-	BCAT2	BCAT2	H3k4me2	1vs<1	SPLICING	0	-Inf
chr19	49310257	49310331	-	BCAT2	BCAT2	H3k4me2	1vs<1	SPLICING	0	-Inf
chr19	18548409	18548570	-	ISYNA1	ISYNA1	H3k4me3	0vs>0	SPLICING	0.0275146615673849	4.02653317065534
chr19	44530178	44530238	+	ZNF222	ZNF222	H3k4me3	0vs>0	SPLICING	0.00660147698129442	5.42611352708636
chr19	11624619	11625036	-	ECSIT	ECSIT	H3k4me3	1vs<1	SPLICING	0	-Inf
chr19	35433498	35433577	+	ZNF30	ZNF30	H3k4me3	1vs<1	SPLICING	0	-Inf
chr19	47731415	47731703	-	BBC3	BBC3	H3k4me3	1vs<1	SPLICING	0.000959197596999797	-7.68893747509793
chr19	49309774	49309974	-	BCAT2	BCAT2	H3k4me3	1vs<1	SPLICING	0	-Inf
chr19	49310257	49310331	-	BCAT2	BCAT2	H3k4me3	1vs<1	SPLICING	0	-Inf
chr19	49494559	49494740	-	GYS1	GYS1	H3k4me3	1vs<1	SPLICING	0.00890056573588978	-5.37555274974204
chr19	52431148	52431247	+	ZNF613	ZNF613	H3k4me3	1vs<1	SPLICING	0.0116014293422561	-5.11901034756634
chr19	58697079	58697205	+	ZNF274	ZNF274	H3k4me3	1vs<1	SPLICING	0	-Inf
chr19	47729821	47730011	-	BBC3	BBC3	H3k9ac	1vs<1	SPLICING	0.00549703460103942	5.82777417724411
chr19	47731415	47731703	-	BBC3	BBC3	H3k9ac	1vs<1	SPLICING	0.000432410993353661	-8.61145326667357
chr19	49310257	49310331	-	BCAT2	BCAT2	H3k9ac	1vs<1	SPLICING	0	-Inf
chr19	49494559	49494740	-	GYS1	GYS1	H3k9ac	1vs<1	SPLICING	0.00134567260829371	-7.10181039721967
chr19	52431148	52431247	+	ZNF613	ZNF613	H3k9ac	1vs<1	SPLICING	0.00653351592551215	-5.45966283569972
chr19	18548409	18548570	-	ISYNA1	ISYNA1	H3k9me3	0vs>0	SPLICING	0	-Inf
chr19	37008932	37009045	-	ZNF260	ZNF260	H3k9me3	0vs>0	SPLICING	0.010646016652296	-5.18352635509873
chr19	53626754	53626908	-	ZNF415	ZNF415	H3k9me3	0vs>0	SPLICING	0	-Inf
chr19	57986392	57986514	-	ZNF772	ZNF772	H3k9me3	0vs>0	SPLICING	0.0217063552137776	-4.43847444162819
chr19	8369915	8370040	-	CD320	CD320	H3k9me3	1vs<1	SPLICING	0	-Inf
chr19	32882022	32882092	-	XLOC_014244	XLOC_014244	H3k9me3	1vs<1	SPLICING	0	-Inf
chr19	35433498	35433577	+	ZNF30	ZNF30	H3k9me3	1vs<1	SPLICING	0.0104080999630844	-5.26944227954748
chr19	53217268	53217394	-	ZNF611	ZNF611	H3k9me3	1vs<1	SPLICING	0	-Inf
chr19	58697079	58697205	+	ZNF274	ZNF274	H3k9me3	1vs<1	SPLICING	0.00708696528028112	-5.73406978189557
chr19	2098975	2099028	+	IZUMO4	IZUMO4	H4k20me1	0vs>0	SPLICING	0	-Inf
chr19	16321171	16321206	+	AP1M1	AP1M1	H4k20me1	0vs>0	SPLICING	0	-Inf
chr19	38797554	38797630	-	YIF1B	YIF1B	H4k20me1	0vs>0	SPLICING	0	-Inf
chr19	39659265	39659480	+	PAK4	PAK4	H4k20me1	0vs>0	SPLICING	0.0272506046900961	-4.6666888101588
chr19	5684830	5684916	+	HSD11B1L	HSD11B1L	H4k20me1	1vs<1	SPLICING	0	-Inf
chr19	8369915	8370040	-	CD320	CD320	H4k20me1	1vs<1	SPLICING	0	-Inf
chr19	9448472	9448534	+	ZNF177	ZNF177	H4k20me1	1vs<1	SPLICING	0	-Inf
chr19	9449869	9449995	+	ZNF177	ZNF177	H4k20me1	1vs<1	SPLICING	0	-Inf
chr19	11623871	11624094	-	ECSIT	ECSIT	H4k20me1	1vs<1	SPLICING	0	-Inf
chr19	11624619	11625036	-	ECSIT	ECSIT	H4k20me1	1vs<1	SPLICING	0	-Inf
chr19	49458944	49459090	+	BAX	BAX	H4k20me1	1vs<1	SPLICING	2.10043140725243e-05	-12.8636440836167
chr19	2098975	2099028	+	IZUMO4	IZUMO4	H3k27ac	0vs>0	SPLICING	0	-Inf
chr19	5686427	5686538	+	HSD11B1L	HSD11B1L	H3k27ac	0vs>0	SPLICING	0.0294184763222985	-4.10599465978257
chr19	8369915	8370040	-	CD320	CD320	H3k27ac	1vs<1	SPLICING	0	-Inf
chr19	11624619	11625036	-	ECSIT	ECSIT	H3k27ac	1vs<1	SPLICING	0	-Inf
chr19	47731415	47731703	-	BBC3	BBC3	H3k27ac	1vs<1	SPLICING	0.00153546764881447	-7.04318070941862
chr19	49309774	49309974	-	BCAT2	BCAT2	H3k27ac	1vs<1	SPLICING	0	-Inf
chr19	49310257	49310331	-	BCAT2	BCAT2	H3k27ac	1vs<1	SPLICING	5.58321621564604e-05	-11.7204180621619
chr19	52031414	52031507	-	SIGLEC6	SIGLEC6	H3k27me3	0vs>0	SPLICING	0	-Inf
chr19	5229502	5229695	-	PTPRS	PTPRS	H3k27me3	1vs<1	SPLICING	0	-Inf
chr19	1433738	1433826	+	DAZAP1	DAZAP1	H3k36me3	0vs>0	SPLICING	0.00257767106891612	-7.09907648241164
chr19	7150508	7150543	-	INSR	INSR	H3k36me3	0vs>0	SPLICING	0	-Inf
chr19	37008932	37009045	-	ZNF260	ZNF260	H3k36me3	0vs>0	SPLICING	0.0153705384953871	-5.26387750525968
chr19	8369915	8370040	-	CD320	CD320	H3k36me3	1vs<1	SPLICING	0	-Inf
chr19	44531550	44531642	+	ZNF222	ZNF222	H3k36me3	1vs<1	SPLICING	0.0158735583246507	-5.26295818404
chr19	50165205	50165585	-	IRF3	IRF3	H3k36me3	1vs<1	SPLICING	0.00391325200803524	6.92187568767254
chr19	16321171	16321206	+	AP1M1	AP1M1	H3k79me2	0vs>0	SPLICING	3.22069863248937e-05	-12.5380849469115
chr19	53075493	53075621	+	ZNF701	ZNF701	H3k79me2	0vs>0	SPLICING	0.00867710976062157	-5.24581158419492
chr19	1011095	1011194	-	C19orf6	C19orf6	H3k79me2	1vs<1	SPLICING	0	-Inf
chr19	8369915	8370040	-	CD320	CD320	H3k79me2	1vs<1	SPLICING	0	-Inf
chr19	52431148	52431247	+	ZNF613	ZNF613	H3k79me2	1vs<1	SPLICING	9.08520790440596e-05	-11.5410291310559
chr19	373940	374011	-	THEG	THEG	H2az	0vs1	SPLICING	0	-Inf
chr19	8369915	8370040	-	CD320	CD320	H2az	1vs<1	SPLICING	0	-Inf
chr19	47731415	47731703	-	BBC3	BBC3	H2az	1vs<1	SPLICING	0.00546423450420959	-5.52095725511615
chr19	58695288	58695365	+	ZNF274	ZNF274	H2az	1vs<1	SPLICING	0.0172128474758782	-4.46427087774322
chr19	17448326	17448473	+	GTPBP3	GTPBP3	H3k4me1	1vs<1	TSSS	0	-Inf
chr19	45909550	45909607	-	PPP1R13L	PPP1R13L	H3k4me1	1vs<1	TSSS	0	-Inf
chr19	17448326	17448473	+	GTPBP3	GTPBP3	H3k4me2	1vs<1	TSSS	0.000562545283214314	-10.2277682850835
chr19	30205814	30205963	-	C19orf12	C19orf12	H3k4me2	1vs<1	TSSS	0.0187837389932632	-5.0203461903737
chr19	41107277	41107543	+	LTBP4	LTBP4	H3k4me2	1vs<1	TSSS	0.00464275040352719	6.88170127971201
chr19	41945787	41945843	-	ATP5SL	ATP5SL	H3k4me2	1vs<1	TSSS	0.0117934096130317	8.32172703855329
chr19	45909550	45909607	-	PPP1R13L	PPP1R13L	H3k4me2	1vs<1	TSSS	0.00233195703977508	-7.92511164578431
chr19	52839498	52839759	+	ZNF610	ZNF610	H3k4me2	1vs<1	TSSS	0.0143119397785627	-6.28350477720735
chr19	53073526	53073583	+	ZNF701	ZNF701	H3k4me2	1vs<1	TSSS	0.0201433482586965	-4.93835112333755
chr19	30205814	30205963	-	C19orf12	C19orf12	H3k4me3	1vs<1	TSSS	0.000358169492288953	-9.72911799245582
chr19	32896655	32896815	+	DPY19L3	DPY19L3	H3k4me3	1vs<1	TSSS	0.00105428404652068	-8.08269362310286
chr19	36705524	36705566	-	ZNF565	ZNF565	H3k4me3	1vs<1	TSSS	0.038809718323595	-3.71686249246857
chr19	41107277	41107543	+	LTBP4	LTBP4	H3k4me3	1vs<1	TSSS	0.0002602424545098	10.2936996868998
chr19	42387267	42387356	+	ARHGEF1	ARHGEF1	H3k4me3	1vs<1	TSSS	0.0490950068921266	-3.49775247378879
chr19	44100738	44100895	+	ZNF576	ZNF576	H3k4me3	1vs<1	TSSS	0.0333482516911207	-3.88562245266233
chr19	45909550	45909607	-	PPP1R13L	PPP1R13L	H3k4me3	1vs<1	TSSS	0.00243496756836773	-6.82200352258344
chr19	49314241	49314320	-	BCAT2	BCAT2	H3k4me3	1vs<1	TSSS	0.00667447316488589	-5.5946823434787
chr19	51472746	51472929	-	KLK6	KLK6	H3k4me3	1vs<1	TSSS	0	-Inf
chr19	52839498	52839759	+	ZNF610	ZNF610	H3k4me3	1vs<1	TSSS	0.03812768692557	-4.1885534560565
chr19	53073526	53073583	+	ZNF701	ZNF701	H3k4me3	1vs<1	TSSS	0.0324069843021804	-3.92166143046583
chr19	55477711	55477835	+	NLRP2	NLRP2	H3k4me3	1vs<1	TSSS	0	-Inf
chr19	20150152	20150277	-	ZNF682	ZNF682	H3k9ac	1vs<1	TSSS	0.0271674488656534	-4.54431728921992
chr19	30205814	30205963	-	C19orf12	C19orf12	H3k9ac	1vs<1	TSSS	0.000692708691482303	-8.12878719399183
chr19	32896655	32896815	+	DPY19L3	DPY19L3	H3k9ac	1vs<1	TSSS	0.000692708691482303	-8.11527228360291
chr19	36705524	36705566	-	ZNF565	ZNF565	H3k9ac	1vs<1	TSSS	0.00744422147984206	-5.34096051462726
chr19	42387267	42387356	+	ARHGEF1	ARHGEF1	H3k9ac	1vs<1	TSSS	0.00122784572731919	-7.38846594945363
chr19	49314241	49314320	-	BCAT2	BCAT2	H3k9ac	1vs<1	TSSS	0.000414162189764746	-8.91335425441706
chr19	53073526	53073583	+	ZNF701	ZNF701	H3k9ac	1vs<1	TSSS	0.00250502871	-6.53273056179728
chr19	3506295	3506472	+	FZR1	FZR1	H3k27ac	1vs<1	TSSS	0.000788534051006748	-7.91248687402878
chr19	30205814	30205963	-	C19orf12	C19orf12	H3k27ac	1vs<1	TSSS	0.000220302076466891	-10.0236919987704
chr19	32896655	32896815	+	DPY19L3	DPY19L3	H3k27ac	1vs<1	TSSS	6.08874889181252e-05	-12.2834570826414
chr19	36705524	36705566	-	ZNF565	ZNF565	H3k27ac	1vs<1	TSSS	0.003164998962015	-6.12090621930113
chr19	37663529	37663615	-	ZNF585A	ZNF585A	H3k27ac	1vs<1	TSSS	0.0182135730713584	-4.37176703521658
chr19	42387267	42387356	+	ARHGEF1	ARHGEF1	H3k27ac	1vs<1	TSSS	0.000794105631404636	-7.83745523360734
chr19	44100738	44100895	+	ZNF576	ZNF576	H3k27ac	1vs<1	TSSS	0.0100917126949919	-4.90349647630775
chr19	49314241	49314320	-	BCAT2	BCAT2	H3k27ac	1vs<1	TSSS	8.82082413188002e-05	-11.4509706547074
chr19	53073526	53073583	+	ZNF701	ZNF701	H3k27ac	1vs<1	TSSS	0.00283768091064773	-6.23165836815553
chr19	6424464	6424822	-	KHSRP	KHSRP	H3k79me2	1vs<1	TSSS	0.0498580968935037	-4.04500183524769
chr19	30205814	30205963	-	C19orf12	C19orf12	H3k79me2	1vs<1	TSSS	0.00266726459529286	-7.20311950906764
chr19	49314241	49314320	-	BCAT2	BCAT2	H3k79me2	1vs<1	TSSS	0	-Inf
chr19	30205814	30205963	-	C19orf12	C19orf12	H2az	1vs<1	TSSS	0.00247741384919296	-7.40356261255834
chr19	32896655	32896815	+	DPY19L3	DPY19L3	H2az	1vs<1	TSSS	0.017017012006954	-4.97789365876308
chr19	41107277	41107543	+	LTBP4	LTBP4	H2az	1vs<1	TSSS	0.0187015237649744	4.83564170840058
chr19	45909550	45909607	-	PPP1R13L	PPP1R13L	H2az	1vs<1	TSSS	0.0424821187088124	-3.93711856203681
chr19	49314241	49314320	-	BCAT2	BCAT2	H2az	1vs<1	TSSS	0.0246837812575893	-4.47094361405097
chr2	99771945	99772007	+	LIPT1	LIPT1	H3k4me1	0vs>0	SPLICING	0	-Inf
chr2	20738931	20739265	-	XLOC_015873	XLOC_015873	H3k4me1	1vs<1	SPLICING	0.00448930733525666	9.00988673695927
chr2	97490795	97490938	+	CNNM3	CNNM3	H3k4me1	1vs<1	SPLICING	0	-Inf
chr2	210557349	210561074	+	MAP2	MAP2	H3k4me1	1vs<1	SPLICING	0	-Inf
chr2	210561266	210561472	+	MAP2	MAP2	H3k4me1	1vs<1	SPLICING	0	-Inf
chr2	85921876	85922119	+	GNLY	GNLY	H3k4me2	0vs>0	SPLICING	0	-Inf
chr2	99771945	99772007	+	LIPT1	LIPT1	H3k4me2	0vs>0	SPLICING	0.00199671243626334	-6.72740700257351
chr2	179565847	179565930	-	TTN	TTN	H3k4me2	0vs>0	SPLICING	0.0308648413677135	-4.16922665180403
chr2	179578624	179578902	-	TTN	TTN	H3k4me2	0vs>0	SPLICING	0	-Inf
chr2	106013104	106013154	-	FHL2	FHL2	H3k4me2	1vs<1	SPLICING	0.0108883090657143	-5.77239052877706
chr2	122407877	122407957	+	XLOC_015272	XLOC_015272	H3k4me2	1vs<1	SPLICING	0.0484989379526993	-4.0074615186136
chr2	210557349	210561074	+	MAP2	MAP2	H3k4me2	1vs<1	SPLICING	0	-Inf
chr2	210561266	210561472	+	MAP2	MAP2	H3k4me2	1vs<1	SPLICING	0	-Inf
chr2	210561641	210561775	+	MAP2	MAP2	H3k4me2	1vs<1	SPLICING	0	-Inf
chr2	85921876	85922119	+	GNLY	GNLY	H3k4me3	0vs>0	SPLICING	0	-Inf
chr2	99771945	99772007	+	LIPT1	LIPT1	H3k4me3	0vs>0	SPLICING	0.000155698727875764	-9.72333567047465
chr2	120125140	120125220	+	DBI	DBI	H3k4me3	0vs>0	SPLICING	0.00678263830218742	-5.33653644409713
chr2	27258462	27258596	+	TMEM214	TMEM214	H3k4me3	1vs<1	SPLICING	0	-Inf
chr2	106013104	106013154	-	FHL2	FHL2	H3k4me3	1vs<1	SPLICING	0.038631940660431	-4.27041935521283
chr2	122407877	122407957	+	XLOC_015272	XLOC_015272	H3k4me3	1vs<1	SPLICING	0.000431092649337538	-8.66132618305699
chr2	210561266	210561472	+	MAP2	MAP2	H3k4me3	1vs<1	SPLICING	0	-Inf
chr2	85921876	85922119	+	GNLY	GNLY	H3k9ac	0vs>0	SPLICING	0	-Inf
chr2	99771945	99772007	+	LIPT1	LIPT1	H3k9ac	0vs>0	SPLICING	0.00122648918198922	-7.18671669149803
chr2	120125140	120125220	+	DBI	DBI	H3k9ac	0vs>0	SPLICING	0.00811894834430374	-5.16709395488997
chr2	179515970	179516047	-	TTN	TTN	H3k9ac	0vs>0	SPLICING	0	-Inf
chr2	179563570	179563641	-	TTN	TTN	H3k9ac	0vs>0	SPLICING	0	-Inf
chr2	179596032	179596310	-	TTN	TTN	H3k9ac	0vs>0	SPLICING	0	-Inf
chr2	27258462	27258596	+	TMEM214	TMEM214	H3k9ac	1vs<1	SPLICING	0	-Inf
chr2	122407877	122407957	+	XLOC_015272	XLOC_015272	H3k9ac	1vs<1	SPLICING	0.000486052938156812	-8.35239753849653
chr2	231738132	231738272	+	ITM2C	ITM2C	H3k9ac	1vs<1	SPLICING	1.81287691255662e-05	-13.3383223993646
chr2	44428325	44429184	+	PPM1B	PPM1B	H3k9me1	1vs<1	SPLICING	0	-Inf
chr2	99771945	99772007	+	LIPT1	LIPT1	H3k9me3	0vs>0	SPLICING	0	-Inf
chr2	179596032	179596310	-	TTN	TTN	H3k9me3	0vs>0	SPLICING	0	-Inf
chr2	179596420	179596698	-	TTN	TTN	H3k9me3	0vs>0	SPLICING	0	-Inf
chr2	179596793	179597074	-	TTN	TTN	H3k9me3	0vs>0	SPLICING	0	-Inf
chr2	179599434	179599715	-	TTN	TTN	H3k9me3	0vs>0	SPLICING	0	-Inf
chr2	97490795	97490938	+	CNNM3	CNNM3	H3k9me3	1vs<1	SPLICING	0	-Inf
chr2	99771945	99772007	+	LIPT1	LIPT1	H4k20me1	0vs>0	SPLICING	0	-Inf
chr2	242259618	242259702	+	SEPT2	SEPT2	H4k20me1	0vs>0	SPLICING	0.0281372615488753	-4.34851773544401
chr2	53992514	53992722	-	ASB3	ASB3	H4k20me1	1vs<1	SPLICING	0	-Inf
chr2	97490795	97490938	+	CNNM3	CNNM3	H4k20me1	1vs<1	SPLICING	3.68230564915789e-06	-16.273408698199
chr2	182218935	182219070	+	XLOC_015475	XLOC_015475	H4k20me1	1vs<1	SPLICING	0	-Inf
chr2	85921876	85922119	+	GNLY	GNLY	H3k27ac	0vs>0	SPLICING	0	-Inf
chr2	99771945	99772007	+	LIPT1	LIPT1	H3k27ac	0vs>0	SPLICING	0.000286078813311379	-8.78672007793622
chr2	120125140	120125220	+	DBI	DBI	H3k27ac	0vs>0	SPLICING	0.0101273264947386	-4.96019374747542
chr2	97490795	97490938	+	CNNM3	CNNM3	H3k27ac	1vs<1	SPLICING	0	-Inf
chr2	106013104	106013154	-	FHL2	FHL2	H3k27ac	1vs<1	SPLICING	0.000231172749909908	-10.8459175103008
chr2	122407877	122407957	+	XLOC_015272	XLOC_015272	H3k27ac	1vs<1	SPLICING	0.000686203538013013	-7.9336227850102
chr2	210561266	210561472	+	MAP2	MAP2	H3k27ac	1vs<1	SPLICING	0	-Inf
chr2	179587773	179588051	-	TTN	TTN	H3k27me3	0vs>0	SPLICING	0.0257254947244809	-4.50297892523204
chr2	179590095	179590376	-	TTN	TTN	H3k27me3	0vs>0	SPLICING	0.000771436359727828	-7.77035333900819
chr2	86509293	86509365	-	REEP1	REEP1	H3k27me3	1vs<1	SPLICING	0	-Inf
chr2	179603868	179606648	-	TTN	TTN	H3k27me3	1vs<1	SPLICING	0.0236950023613882	4.56639192526059
chr2	242259618	242259702	+	SEPT2	SEPT2	H3k36me3	0vs>0	SPLICING	0.0302670133266976	-4.58140860901183
chr2	32323865	32323960	+	SPAST	SPAST	H3k36me3	1vs<1	SPLICING	1.10465185064672e-05	-16.4704925468669
chr2	53992514	53992722	-	ASB3	ASB3	H3k36me3	1vs<1	SPLICING	0	-Inf
chr2	97490795	97490938	+	CNNM3	CNNM3	H3k36me3	1vs<1	SPLICING	0.000382168801986668	-9.86162067090189
chr2	241535736	241535938	+	CAPN10	CAPN10	H3k36me3	1vs<1	SPLICING	0.01377931827591	-5.40341258557754
chr2	99771945	99772007	+	LIPT1	LIPT1	H3k79me2	0vs>0	SPLICING	1.26372967202932e-05	-14.2719305425446
chr2	53992514	53992722	-	ASB3	ASB3	H3k79me2	1vs<1	SPLICING	0.00328881265675661	-6.49430261949026
chr2	97490795	97490938	+	CNNM3	CNNM3	H3k79me2	1vs<1	SPLICING	6.31691025888313e-07	-22.697787796838
chr2	122407877	122407957	+	XLOC_015272	XLOC_015272	H3k79me2	1vs<1	SPLICING	0.00113647530230577	-7.79278290398648
chr2	206165254	206165460	+	PARD3B	PARD3B	H3k79me2	1vs<1	SPLICING	0	-Inf
chr2	135743370	135745823	-	YSK4	YSK4	H2az	0vs1	SPLICING	0	-Inf
chr2	99771945	99772007	+	LIPT1	LIPT1	H2az	0vs>0	SPLICING	0.00317453747413285	-6.01664960765227
chr2	179546103	179546177	-	TTN	TTN	H2az	0vs>0	SPLICING	0	-Inf
chr2	179565847	179565930	-	TTN	TTN	H2az	0vs>0	SPLICING	0	-Inf
chr2	179568874	179569134	-	TTN	TTN	H2az	0vs>0	SPLICING	0	-Inf
chr2	179569604	179569693	-	TTN	TTN	H2az	0vs>0	SPLICING	0	-Inf
chr2	179574293	179574583	-	TTN	TTN	H2az	0vs>0	SPLICING	0	-Inf
chr2	179591817	179592098	-	TTN	TTN	H2az	0vs>0	SPLICING	0	-Inf
chr2	179597167	179597445	-	TTN	TTN	H2az	0vs>0	SPLICING	0	-Inf
chr2	97490795	97490938	+	CNNM3	CNNM3	H2az	1vs<1	SPLICING	0	-Inf
chr2	122407877	122407957	+	XLOC_015272	XLOC_015272	H2az	1vs<1	SPLICING	0.00661877370389625	-5.32085148859607
chr2	182218935	182219070	+	XLOC_015475	XLOC_015475	H2az	1vs<1	SPLICING	0	-Inf
chr2	63275524	63275656	-	LOC100132215	LOC100132215	H3k4me1	1vs<1	TSSS	0	-Inf
chr2	86565147	86565206	-	REEP1	REEP1	H3k4me1	1vs<1	TSSS	0	-Inf
chr2	102608306	102608473	+	IL1R2	IL1R2	H3k4me1	1vs<1	TSSS	0.00339179562710243	-7.18495167243524
chr2	220407947	220408487	-	CHPF	CHPF	H3k4me1	1vs<1	TSSS	0.00282431208415851	-6.74588959763559
chr2	242842509	242843498	-	XLOC_016772	XLOC_016772	H3k4me1	1vs<1	TSSS	0.0258888499923357	-5.16870282080493
chr2	63275524	63275656	-	LOC100132215	LOC100132215	H3k4me2	1vs<1	TSSS	0.000359653101806879	-11.0789368782268
chr2	86565147	86565206	-	REEP1	REEP1	H3k4me2	1vs<1	TSSS	0.00210096870627884	-8.09288487904297
chr2	102608306	102608473	+	IL1R2	IL1R2	H3k4me2	1vs<1	TSSS	0.00278421550217427	-8.57600150770429
chr2	152955463	152955593	-	CACNB4	CACNB4	H3k4me2	1vs<1	TSSS	0.00389970247950202	7.24142587410139
chr2	203776978	203777047	+	ALS2CR8	ALS2CR8	H3k4me2	1vs<1	TSSS	0.00459697489714337	-6.96008185984683
chr2	208489786	208489973	-	FAM119A	FAM119A	H3k4me2	1vs<1	TSSS	0.000784262273271978	9.6084334818407
chr2	233877778	233877951	-	NGEF	NGEF	H3k4me2	1vs<1	TSSS	0	-Inf
chr2	26403585	26405362	+	FAM59B	FAM59B	H3k4me3	1vs<1	TSSS	0	-Inf
chr2	27593151	27593324	-	EIF2B4	EIF2B4	H3k4me3	1vs<1	TSSS	0.0289072375255507	-4.02551273397311
chr2	63275524	63275656	-	LOC100132215	LOC100132215	H3k4me3	1vs<1	TSSS	0	-Inf
chr2	74776147	74776299	+	DOK1	DOK1	H3k4me3	1vs<1	TSSS	0.0068761438089996	-5.55425998204534
chr2	86115947	86116157	-	ST3GAL5	ST3GAL5	H3k4me3	1vs<1	TSSS	0.000127721422438066	11.6786113911907
chr2	86565147	86565206	-	REEP1	REEP1	H3k4me3	1vs<1	TSSS	0.000641974252283778	-8.82193279480251
chr2	102608306	102608473	+	IL1R2	IL1R2	H3k4me3	1vs<1	TSSS	0.000532119014269232	-10.3567756875629
chr2	152955463	152955593	-	CACNB4	CACNB4	H3k4me3	1vs<1	TSSS	0.00280512097107363	6.63606212683657
chr2	178936253	178937482	-	PDE11A	PDE11A	H3k4me3	1vs<1	TSSS	0.0445540567669678	-3.76577166579012
chr2	181845112	181845273	+	UBE2E3	UBE2E3	H3k4me3	1vs<1	TSSS	0.00184941735536531	-7.34078723622355
chr2	198364506	198364640	-	HSPD1	HSPD1	H3k4me3	1vs<1	TSSS	0.00443403980406185	-6.10776329094548
chr2	202507332	202507410	-	ALS2CR4	ALS2CR4	H3k4me3	1vs<1	TSSS	0.00338062075814017	-6.39921947247525
chr2	203776978	203777047	+	ALS2CR8	ALS2CR8	H3k4me3	1vs<1	TSSS	0.00474305976912669	-6.03380875942816
chr2	220173940	220174295	-	PTPRN	PTPRN	H3k4me3	1vs<1	TSSS	0.00020126694583969	-10.703632135681
chr2	233877778	233877951	-	NGEF	NGEF	H3k4me3	1vs<1	TSSS	0	-Inf
chr2	27593151	27593324	-	EIF2B4	EIF2B4	H3k9ac	1vs<1	TSSS	0.0470201489716493	-3.54731962206036
chr2	63275524	63275656	-	LOC100132215	LOC100132215	H3k9ac	1vs<1	TSSS	0	-Inf
chr2	74776147	74776299	+	DOK1	DOK1	H3k9ac	1vs<1	TSSS	0.00165306802091457	-7.02191273628967
chr2	86115947	86116157	-	ST3GAL5	ST3GAL5	H3k9ac	1vs<1	TSSS	0.0407723482616788	3.67814876802265
chr2	86565147	86565206	-	REEP1	REEP1	H3k9ac	1vs<1	TSSS	0	-Inf
chr2	88990273	88991016	-	XLOC_016194	XLOC_016194	H3k9ac	1vs<1	TSSS	0.0255899955445266	-4.06915542806889
chr2	181845112	181845273	+	UBE2E3	UBE2E3	H3k9ac	1vs<1	TSSS	0.000646144641070102	-8.23364409537537
chr2	198364506	198364640	-	HSPD1	HSPD1	H3k9ac	1vs<1	TSSS	0.000414162189764746	-8.94444219902948
chr2	200322062	200322819	-	SATB2	SATB2	H3k9ac	1vs<1	TSSS	0.0249411396117801	-4.14635046888525
chr2	202507332	202507410	-	ALS2CR4	ALS2CR4	H3k9ac	1vs<1	TSSS	8.11224261731042e-05	-12.1191575124194
chr2	203776978	203777047	+	ALS2CR8	ALS2CR8	H3k9ac	1vs<1	TSSS	6.59597865573732e-06	-17.7584695871787
chr2	208489786	208489973	-	FAM119A	FAM119A	H3k9ac	1vs<1	TSSS	0.00970815431192717	-5.02664974615082
chr2	217277473	217277521	+	SMARCAL1	SMARCAL1	H3k9ac	1vs<1	TSSS	0.00177461911478839	-6.92208536846467
chr2	220407947	220408487	-	CHPF	CHPF	H3k9ac	1vs<1	TSSS	0.0156375986336452	4.55162364744584
chr2	233877778	233877951	-	NGEF	NGEF	H3k9ac	1vs<1	TSSS	0	-Inf
chr2	86565147	86565206	-	REEP1	REEP1	H4k20me1	1vs<1	TSSS	0	-Inf
chr2	63275524	63275656	-	LOC100132215	LOC100132215	H3k27ac	1vs<1	TSSS	0	-Inf
chr2	74776147	74776299	+	DOK1	DOK1	H3k27ac	1vs<1	TSSS	0.0136745178121836	-4.63755023329614
chr2	88990273	88991016	-	XLOC_016194	XLOC_016194	H3k27ac	1vs<1	TSSS	0.0190328678455534	-4.32713272151176
chr2	102608306	102608473	+	IL1R2	IL1R2	H3k27ac	1vs<1	TSSS	0	-Inf
chr2	109150857	109151050	+	LIMS1	LIMS1	H3k27ac	1vs<1	TSSS	0.00860396749887153	-5.05252670072087
chr2	181845112	181845273	+	UBE2E3	UBE2E3	H3k27ac	1vs<1	TSSS	1.27117515462744e-05	-15.5316860276905
chr2	198364506	198364640	-	HSPD1	HSPD1	H3k27ac	1vs<1	TSSS	0.000102826047254263	-11.1774008653341
chr2	201729287	201729467	-	CLK1	CLK1	H3k27ac	1vs<1	TSSS	0.0442383730286454	-3.64315067911082
chr2	202507332	202507410	-	ALS2CR4	ALS2CR4	H3k27ac	1vs<1	TSSS	7.75714502963456e-05	-11.7426154447583
chr2	203776978	203777047	+	ALS2CR8	ALS2CR8	H3k27ac	1vs<1	TSSS	1.9275037862445e-07	-27.7826535470199
chr2	208489786	208489973	-	FAM119A	FAM119A	H3k27ac	1vs<1	TSSS	0.000794105631404636	-7.81260804763567
chr2	214016137	214016333	-	IKZF2	IKZF2	H3k27ac	1vs<1	TSSS	0.0344674701732464	-4.04060296840142
chr2	217277473	217277521	+	SMARCAL1	SMARCAL1	H3k27ac	1vs<1	TSSS	0.00191574865073188	-6.68484338030292
chr2	220407947	220408487	-	CHPF	CHPF	H3k27ac	1vs<1	TSSS	0.004600400573491	5.69935354616899
chr2	233877778	233877951	-	NGEF	NGEF	H3k27ac	1vs<1	TSSS	0	-Inf
chr2	88990273	88991016	-	XLOC_016194	XLOC_016194	H3k27me3	1vs<1	TSSS	0	-Inf
chr2	220407947	220408487	-	CHPF	CHPF	H3k27me3	1vs<1	TSSS	0.0252098965219858	-4.86159419232919
chr2	86565147	86565206	-	REEP1	REEP1	H3k79me2	1vs<1	TSSS	0	-Inf
chr2	198364506	198364640	-	HSPD1	HSPD1	H3k79me2	1vs<1	TSSS	0.015510766171369	-5.38687118422176
chr2	39892638	39892780	+	TMEM178	TMEM178	H2az	1vs<1	TSSS	0	-Inf
chr2	55459359	55459449	-	C2orf63	C2orf63	H2az	1vs<1	TSSS	0.0475039754575926	3.94484212625727
chr2	63275524	63275656	-	LOC100132215	LOC100132215	H2az	1vs<1	TSSS	0	-Inf
chr2	86565147	86565206	-	REEP1	REEP1	H2az	1vs<1	TSSS	0	-Inf
chr2	88990273	88991016	-	XLOC_016194	XLOC_016194	H2az	1vs<1	TSSS	0.00432636837040568	6.52959239881245
chr2	109150857	109151050	+	LIMS1	LIMS1	H2az	1vs<1	TSSS	0.0387798052169324	-4.03841212887543
chr2	152955463	152955593	-	CACNB4	CACNB4	H2az	1vs<1	TSSS	0.0466883097105372	3.82900882811694
chr2	160654643	160654766	-	CD302	CD302	H2az	1vs<1	TSSS	0.00383525351084344	-7.48032972943176
chr2	175547502	175547627	-	WIPF1	WIPF1	H2az	1vs<1	TSSS	0.0423852487297093	3.94549458347176
chr2	198364506	198364640	-	HSPD1	HSPD1	H2az	1vs<1	TSSS	0.0444059918531535	3.88585856922818
chr2	202507332	202507410	-	ALS2CR4	ALS2CR4	H2az	1vs<1	TSSS	0.00279138588863519	-7.24790351200475
chr2	203776978	203777047	+	ALS2CR8	ALS2CR8	H2az	1vs<1	TSSS	0.0382384475385845	-4.0687902451236
chr2	220173940	220174295	-	PTPRN	PTPRN	H2az	1vs<1	TSSS	0	-Inf
chr2	233877778	233877951	-	NGEF	NGEF	H2az	1vs<1	TSSS	0	-Inf
chr2	242750160	242750369	+	NEU4	NEU4	H2az	1vs<1	TSSS	0	-Inf
chr2	242842509	242843498	-	XLOC_016772	XLOC_016772	H2az	1vs<1	TSSS	0.0394295275095342	-4.55965747569897
chr20	32298361	32298559	-	PXMP4	PXMP4	H3k4me1	0vs>0	SPLICING	0.00675034281785031	-5.63418921646407
chr20	33902491	33902568	-	UQCC	UQCC	H3k4me1	1vs<1	SPLICING	0.000970144375671963	-7.76156626753819
chr20	32298361	32298559	-	PXMP4	PXMP4	H3k4me2	0vs>0	SPLICING	5.48209442164131e-05	-11.5454322663654
chr20	2846045	2846141	+	PTPRA	PTPRA	H3k4me3	1vs<1	SPLICING	0	-Inf
chr20	34802279	34802362	+	EPB41L1	EPB41L1	H3k9ac	1vs<1	SPLICING	0	-Inf
chr20	3095951	3096112	-	FASTKD5	FASTKD5	H3k9me3	1vs<1	SPLICING	0	-Inf
chr20	50782403	50782564	-	ZFP64	ZFP64	H3k9me3	1vs<1	SPLICING	0.0215663368724168	-4.50315601745281
chr20	50782403	50782564	-	ZFP64	ZFP64	H4k20me1	1vs<1	SPLICING	0	-Inf
chr20	31394015	31394133	+	DNMT3B	DNMT3B	H3k27ac	0vs>0	SPLICING	0	-Inf
chr20	33902491	33902568	-	UQCC	UQCC	H3k27ac	1vs<1	SPLICING	0	-Inf
chr20	50782403	50782564	-	ZFP64	ZFP64	H3k36me3	1vs<1	SPLICING	0.0237882222785914	-4.81531422739278
chr20	2955861	2955887	+	PTPRA	PTPRA	H3k79me2	0vs>0	SPLICING	0	-Inf
chr20	44047492	44047619	+	PIGT	PIGT	H3k79me2	1vs<1	SPLICING	0	-Inf
chr20	44444180	44444384	+	UBE2C	UBE2C	H3k79me2	1vs<1	SPLICING	0.00783094417770562	5.64956764259808
chr20	31394015	31394133	+	DNMT3B	DNMT3B	H2az	0vs>0	SPLICING	0.000111690541565822	-9.95286658431372
chr20	34761686	34761876	+	EPB41L1	EPB41L1	H2az	1vs<1	SPLICING	0	-Inf
chr20	34742662	34742818	+	EPB41L1	EPB41L1	H3k4me1	1vs<1	TSSS	0.0354977751772902	-4.22429168231858
chr20	10414756	10414866	-	MKKS	MKKS	H3k4me2	1vs<1	TSSS	0.036535881091577	-4.24208202279098
chr20	31350191	31350505	+	DNMT3B	DNMT3B	H3k4me2	1vs<1	TSSS	0.0256000059495298	-4.59284805699718
chr20	30458120	30458479	-	DUSP15	DUSP15	H3k4me3	1vs<1	TSSS	0.0242452579379743	4.89288319349844
chr20	33146519	33146712	+	MAP1LC3A	MAP1LC3A	H3k4me3	1vs<1	TSSS	0.0349753100289065	-4.03752745865919
chr20	34742662	34742818	+	EPB41L1	EPB41L1	H3k4me3	1vs<1	TSSS	0.0398085344620783	3.6864375943895
chr20	46988654	46988893	+	LOC284749	LOC284749	H3k4me3	1vs<1	TSSS	0.0274322812672318	-177.973783086573
chr20	61569148	61569304	-	DIDO1	DIDO1	H3k4me3	1vs<1	TSSS	0.0466034961854929	-3.54619519852467
chr20	62587613	62587800	-	UCKL1	UCKL1	H3k4me3	1vs<1	TSSS	0.00243496756836773	-6.82288098754657
chr20	62711226	62711324	-	RGS19	RGS19	H3k4me3	1vs<1	TSSS	0.0129325892086843	-4.82663082036453
chr20	3996084	3996216	-	RNF24	RNF24	H3k9ac	1vs<1	TSSS	0.002603190761318	-6.47094175483075
chr20	61569148	61569304	-	DIDO1	DIDO1	H3k9ac	1vs<1	TSSS	0.000863210701305155	-7.78059926494613
chr20	62587613	62587800	-	UCKL1	UCKL1	H3k9ac	1vs<1	TSSS	0.001418303394448	-7.20753630215907
chr20	62711226	62711324	-	RGS19	RGS19	H3k9ac	1vs<1	TSSS	0.000773405056019408	-7.93630385091409
chr20	3996084	3996216	-	RNF24	RNF24	H3k27ac	1vs<1	TSSS	0.00119236197405933	-7.26819173645758
chr20	61569148	61569304	-	DIDO1	DIDO1	H3k27ac	1vs<1	TSSS	0.00117046104303743	-7.30241240724992
chr20	62587613	62587800	-	UCKL1	UCKL1	H3k27ac	1vs<1	TSSS	0.0011370733842869	-7.34778732734085
chr20	62711226	62711324	-	RGS19	RGS19	H3k27ac	1vs<1	TSSS	0	-Inf
chr20	34742662	34742818	+	EPB41L1	EPB41L1	H3k27me3	1vs<1	TSSS	0	-Inf
chr20	61569148	61569304	-	DIDO1	DIDO1	H3k79me2	1vs<1	TSSS	0.0279363399979089	4.64035779618195
chr20	62711226	62711324	-	RGS19	RGS19	H2az	1vs<1	TSSS	0.00110494781853185	-8.57270980394022
chr21	44883220	44883369	-	C21orf125	C21orf125	H3k4me1	0vs>0	SPLICING	0	-Inf
chr21	37849672	37849861	-	CLDN14	CLDN14	H3k4me2	0vs>0	SPLICING	0	-Inf
chr21	37849672	37849861	-	CLDN14	CLDN14	H3k4me3	0vs>0	SPLICING	0	-Inf
chr21	45724158	45724338	+	PFKL	PFKL	H3k4me3	0vs>0	SPLICING	0.00691690095786169	-5.27158946228502
chr21	37849672	37849861	-	CLDN14	CLDN14	H3k9ac	0vs>0	SPLICING	0	-Inf
chr21	45724158	45724338	+	PFKL	PFKL	H3k9ac	0vs>0	SPLICING	0.000347114664123587	-8.68891044933497
chr21	39817327	39817544	-	ERG	ERG	H3k9me1	1vs<1	SPLICING	0	-Inf
chr21	45725683	45725818	+	PFKL	PFKL	H4k20me1	0vs>0	SPLICING	5.32348212327507e-05	-10.9866715960923
chr21	47602538	47603688	-	C21orf56	C21orf56	H4k20me1	0vs>0	SPLICING	0.000249024075765441	-8.88982912717214
chr21	47904670	47904741	+	DIP2A	DIP2A	H4k20me1	1vs<1	SPLICING	0	-Inf
chr21	47910513	47910632	+	DIP2A	DIP2A	H4k20me1	1vs<1	SPLICING	0.024681067444019	-4.3945224573242
chr21	44883220	44883369	-	C21orf125	C21orf125	H3k27ac	0vs>0	SPLICING	0.00389767118765878	-7.16083319253729
chr21	45725683	45725818	+	PFKL	PFKL	H3k27ac	0vs>0	SPLICING	0.000130407875965918	-9.97685479565776
chr21	45725683	45725818	+	PFKL	PFKL	H3k36me3	0vs>0	SPLICING	0	-Inf
chr21	47910513	47910632	+	DIP2A	DIP2A	H3k36me3	1vs<1	SPLICING	0.0170159914892869	-5.18397970887104
chr21	47910513	47910632	+	DIP2A	DIP2A	H3k79me2	1vs<1	SPLICING	0.0219913239578059	-4.68542173565003
chr21	43298804	43298969	-	PRDM15	PRDM15	H2az	0vs>0	SPLICING	0.0275564751488988	4.31747516549342
chr21	44496335	44496472	-	CBS	CBS	H3k4me1	1vs<1	TSSS	0.00886298438382106	-5.49014982729404
chr21	45705763	45706021	+	AIRE	AIRE	H3k4me2	1vs<1	TSSS	0	-Inf
chr21	44496335	44496472	-	CBS	CBS	H3k4me3	1vs<1	TSSS	0.034103153371744	3.85680244666844
chr21	43483068	43483323	+	UMODL1	UMODL1	H3k27me3	1vs<1	TSSS	0	-Inf
chr21	44496335	44496472	-	CBS	CBS	H3k27me3	1vs<1	TSSS	0.0016926945745679	-7.62670008407947
chr21	43816051	43816200	-	TMPRSS3	TMPRSS3	H2az	1vs<1	TSSS	0.0211627718773322	-5.44064036338056
chr21	44496335	44496472	-	CBS	CBS	H2az	1vs<1	TSSS	0.0183328134986639	4.86568778240246
chr21	45705763	45706021	+	AIRE	AIRE	H2az	1vs<1	TSSS	0.017017012006954	-6.73799575756511
chr22	26875231	26875551	-	HPS4	HPS4	H3k4me2	0vs>0	SPLICING	0.0130431	-13.1406
chr22	40677123	40677293	+	TNRC6B	TNRC6B	H3k4me1	0vs>0	SPLICING	0.00141124369446801	-7.32345134241384
chr22	30823158	30823390	+	MTFP1	MTFP1	H3k4me1	1vs<1	SPLICING	0.00026545801704514	-9.62494423672108
chr22	20749623	20749708	+	ZNF74	ZNF74	H3k4me2	1vs<1	SPLICING	0.0185385470828466	-4.84941772931927
chr22	30823158	30823390	+	MTFP1	MTFP1	H3k4me2	1vs<1	SPLICING	0.000119358943351497	-10.545748630508
chr22	27063148	27063273	+	MIAT	MIAT	H3k4me3	0vs>0	SPLICING	0	-Inf
chr22	50315945	50316091	+	CRELD2	CRELD2	H3k4me3	0vs>0	SPLICING	0	-Inf
chr22	30823158	30823390	+	MTFP1	MTFP1	H3k4me3	1vs<1	SPLICING	0	-Inf
chr22	50315945	50316091	+	CRELD2	CRELD2	H3k9ac	0vs>0	SPLICING	0	-Inf
chr22	30823158	30823390	+	MTFP1	MTFP1	H3k9ac	1vs<1	SPLICING	0	-Inf
chr22	50613861	50613911	+	PANX2	PANX2	H3k9me3	0vs>0	SPLICING	0	-Inf
chr22	30823158	30823390	+	MTFP1	MTFP1	H3k9me3	1vs<1	SPLICING	0	-Inf
chr22	50315945	50316091	+	CRELD2	CRELD2	H4k20me1	0vs>0	SPLICING	0	-Inf
chr22	21947150	21947245	+	UBE2L3	UBE2L3	H4k20me1	1vs<1	SPLICING	0.00360462507615665	-6.21103672371511
chr22	40677123	40677293	+	TNRC6B	TNRC6B	H3k27ac	0vs>0	SPLICING	0.00239363803797606	-6.41383342367098
chr22	30823158	30823390	+	MTFP1	MTFP1	H3k27ac	1vs<1	SPLICING	0	-Inf
chr22	40677123	40677293	+	TNRC6B	TNRC6B	H3k27me3	0vs>0	SPLICING	0	-Inf
chr22	21947150	21947245	+	UBE2L3	UBE2L3	H3k27me3	1vs<1	SPLICING	0	-Inf
chr22	29670254	29670271	+	EWSR1	EWSR1	H3k36me3	0vs>0	SPLICING	0.000569354767944808	-8.83999739027344
chr22	50315945	50316091	+	CRELD2	CRELD2	H3k36me3	0vs>0	SPLICING	0.000343513838937236	-9.55578161746355
chr22	30035079	30035201	+	NF2	NF2	H3k36me3	1vs<1	SPLICING	0.00335574476588712	-7.11892352374868
chr22	30823158	30823390	+	MTFP1	MTFP1	H3k36me3	1vs<1	SPLICING	0.000173574042806121	-11.1180902632216
chr22	20749623	20749708	+	ZNF74	ZNF74	H3k79me2	1vs<1	SPLICING	7.56761856465263e-05	-11.9225550523451
chr22	30823158	30823390	+	MTFP1	MTFP1	H3k79me2	1vs<1	SPLICING	0.000100912376108728	-11.2067399277829
chr22	30823158	30823390	+	MTFP1	MTFP1	H2az	1vs<1	SPLICING	0	-Inf
chr22	36236239	36236630	-	RBFOX2	RBFOX2	H3k4me1	1vs<1	TSSS	0.00886298438382106	-5.92580373782194
chr22	50523784	50524358	-	MLC1	MLC1	H3k4me2	1vs<1	TSSS	0.04748301225948	5.82566157441828
chr22	19165900	19166034	-	SLC25A1	SLC25A1	H3k4me3	1vs<1	TSSS	0.00641949723501497	-5.63868623135355
chr22	21212858	21213070	-	PI4KA	PI4KA	H3k4me3	1vs<1	TSSS	0.0127283170131351	-4.8817953300749
chr22	31885680	31885874	-	EIF4ENIF1	EIF4ENIF1	H3k4me3	1vs<1	TSSS	0.010685787168252	5.0474477291901
chr22	50528435	50528614	+	MOV10L1	MOV10L1	H3k4me3	1vs<1	TSSS	0	-Inf
chr22	51039131	51039312	+	MAPK8IP2	MAPK8IP2	H3k4me3	1vs<1	TSSS	0.0466034961854929	3.90283401900755
chr22	19165900	19166034	-	SLC25A1	SLC25A1	H3k9ac	1vs<1	TSSS	0.00050070535474048	-8.63796080644382
chr22	21212858	21213070	-	PI4KA	PI4KA	H3k9ac	1vs<1	TSSS	0.0291845117284423	-3.94067275963831
chr22	50528435	50528614	+	MOV10L1	MOV10L1	H3k9me3	1vs<1	TSSS	0	-Inf
chr22	19165900	19166034	-	SLC25A1	SLC25A1	H4k20me1	1vs<1	TSSS	0	-Inf
chr22	19165900	19166034	-	SLC25A1	SLC25A1	H3k27ac	1vs<1	TSSS	0.000256024912867421	-9.75265787307973
chr22	21212858	21213070	-	PI4KA	PI4KA	H3k27ac	1vs<1	TSSS	0.00769038495145134	-5.18169387060585
chr22	36236239	36236630	-	RBFOX2	RBFOX2	H3k27me3	1vs<1	TSSS	0	-Inf
chr22	19165900	19166034	-	SLC25A1	SLC25A1	H3k79me2	1vs<1	TSSS	9.84129684227868e-05	-12.0439447734511
chr22	19165900	19166034	-	SLC25A1	SLC25A1	H2az	1vs<1	TSSS	0.0183328134986639	-4.86796957786993
chr22	43411027	43411184	-	PACSIN2	PACSIN2	H2az	1vs<1	TSSS	0.017608104925713	-4.92017672891545
chr3	51706357	51706408	+	TEX264	TEX264	H3k4me1	0vs>0	SPLICING	0.00372311400342364	-6.25872168806797
chr3	53077152	53077270	-	SFMBT1	SFMBT1	H3k4me1	0vs>0	SPLICING	0	-Inf
chr3	58468983	58469079	+	XLOC_018963	XLOC_018963	H3k4me1	0vs>0	SPLICING	0	-Inf
chr3	112190059	112190202	-	BTLA	BTLA	H3k4me1	0vs>0	SPLICING	0	-Inf
chr3	138329446	138329879	+	FAIM	FAIM	H3k4me1	0vs>0	SPLICING	0	-Inf
chr3	33109722	33109782	-	GLB1	GLB1	H3k4me1	1vs<1	SPLICING	0	-Inf
chr3	51706357	51706408	+	TEX264	TEX264	H3k4me2	0vs>0	SPLICING	0.0315217979008948	-4.12807611103615
chr3	53077152	53077270	-	SFMBT1	SFMBT1	H3k4me2	0vs>0	SPLICING	0	-Inf
chr3	58468983	58469079	+	XLOC_018963	XLOC_018963	H3k4me2	0vs>0	SPLICING	0	-Inf
chr3	112190059	112190202	-	BTLA	BTLA	H3k4me2	0vs>0	SPLICING	0	-Inf
chr3	138329446	138329879	+	FAIM	FAIM	H3k4me2	0vs>0	SPLICING	0	-Inf
chr3	33099581	33099761	-	GLB1	GLB1	H3k4me2	1vs<1	SPLICING	0.00519995915806307	-6.03674268284992
chr3	101117705	101117899	-	SENP7	SENP7	H3k4me2	1vs<1	SPLICING	0	-Inf
chr3	112711873	112711971	+	GTPBP8	GTPBP8	H3k4me2	1vs<1	SPLICING	0.000330306423333287	-8.98669603661539
chr3	51706357	51706408	+	TEX264	TEX264	H3k4me3	0vs>0	SPLICING	0.00362878746227101	-5.98217012383369
chr3	138329446	138329879	+	FAIM	FAIM	H3k4me3	0vs>0	SPLICING	0	-Inf
chr3	184056175	184056317	+	FAM131A	FAM131A	H3k4me3	0vs>0	SPLICING	5.92931307318224e-05	-11.2436552562569
chr3	69129263	69129304	-	UBA3	UBA3	H3k4me3	1vs<1	SPLICING	0.0189984468607844	-4.69322109475288
chr3	47284541	47284735	-	KIF9	KIF9	H3k9ac	0vs>0	SPLICING	0	-Inf
chr3	51706357	51706408	+	TEX264	TEX264	H3k9ac	0vs>0	SPLICING	9.92590571464632e-06	-14.1247378941146
chr3	58468983	58469079	+	XLOC_018963	XLOC_018963	H3k9ac	0vs>0	SPLICING	0	-Inf
chr3	184034501	184034521	+	EIF4G1	EIF4G1	H3k9ac	0vs>0	SPLICING	0	-Inf
chr3	69129263	69129304	-	UBA3	UBA3	H3k9ac	1vs<1	SPLICING	0.02877907140648	-4.16954619187923
chr3	44756083	44756180	+	ZNF502	ZNF502	H3k9me3	1vs<1	SPLICING	0	-Inf
chr3	71823596	71823658	-	PROK2	PROK2	H4k20me1	0vs>0	SPLICING	0	-Inf
chr3	33099581	33099761	-	GLB1	GLB1	H4k20me1	1vs<1	SPLICING	0	-Inf
chr3	49785251	49785601	-	IP6K1	IP6K1	H4k20me1	1vs<1	SPLICING	0.0245530576842603	-4.41645201040396
chr3	51708287	51708578	+	TEX264	TEX264	H4k20me1	1vs<1	SPLICING	0.0412377740983253	-4.00168452110532
chr3	101117705	101117899	-	SENP7	SENP7	H4k20me1	1vs<1	SPLICING	0	-Inf
chr3	112711873	112711971	+	GTPBP8	GTPBP8	H4k20me1	1vs<1	SPLICING	0	-Inf
chr3	50603437	50603525	-	C3orf18	C3orf18	H3k27ac	0vs>0	SPLICING	0	-Inf
chr3	51706357	51706408	+	TEX264	TEX264	H3k27ac	0vs>0	SPLICING	1.64173043439039e-05	-13.2014503646213
chr3	58468983	58469079	+	XLOC_018963	XLOC_018963	H3k27ac	0vs>0	SPLICING	0	-Inf
chr3	71823596	71823658	-	PROK2	PROK2	H3k27ac	0vs>0	SPLICING	0	-Inf
chr3	112190059	112190202	-	BTLA	BTLA	H3k27ac	0vs>0	SPLICING	0	-Inf
chr3	138329446	138329879	+	FAIM	FAIM	H3k27ac	0vs>0	SPLICING	0	-Inf
chr3	69129263	69129304	-	UBA3	UBA3	H3k27ac	1vs<1	SPLICING	0.00616792938036581	-5.64641033805264
chr3	140953058	140953160	+	ACPL2	ACPL2	H3k27me3	0vs>0	SPLICING	0	-Inf
chr3	9874788	9874929	+	ARPC4	ARPC4	H3k36me3	0vs>0	SPLICING	0.0299283051061169	-4.62285717787955
chr3	138329446	138329879	+	FAIM	FAIM	H3k36me3	0vs>0	SPLICING	2.43102012704502e-05	-13.8298661172798
chr3	33099581	33099761	-	GLB1	GLB1	H3k36me3	1vs<1	SPLICING	0.0218278111661651	-4.91221058603994
chr3	33109722	33109782	-	GLB1	GLB1	H3k36me3	1vs<1	SPLICING	0.0218278111661651	-4.90312693103575
chr3	49508398	49508482	+	DAG1	DAG1	H3k79me2	0vs>0	SPLICING	0.0444653517113473	-3.76812281613752
chr3	51706357	51706408	+	TEX264	TEX264	H3k79me2	0vs>0	SPLICING	0.00256267173475882	-6.43732756120475
chr3	53077152	53077270	-	SFMBT1	SFMBT1	H3k79me2	0vs>0	SPLICING	0.00256267173475882	-6.46621264433127
chr3	58468983	58469079	+	XLOC_018963	XLOC_018963	H3k79me2	0vs>0	SPLICING	0	-Inf
chr3	71823596	71823658	-	PROK2	PROK2	H3k79me2	0vs>0	SPLICING	0	-Inf
chr3	138329446	138329879	+	FAIM	FAIM	H3k79me2	0vs>0	SPLICING	0.000392135705561502	-8.73529086588297
chr3	184056175	184056317	+	FAM131A	FAM131A	H3k79me2	0vs>0	SPLICING	0.00458918360899793	-5.81455735334967
chr3	69129263	69129304	-	UBA3	UBA3	H3k79me2	1vs<1	SPLICING	0.0266416993136936	-4.39001881159063
chr3	51706357	51706408	+	TEX264	TEX264	H2az	0vs>0	SPLICING	0	-Inf
chr3	138329446	138329879	+	FAIM	FAIM	H2az	0vs>0	SPLICING	0	-Inf
chr3	101117705	101117899	-	SENP7	SENP7	H2az	1vs<1	SPLICING	0	-Inf
chr3	127251642	127251756	-	XLOC_019968	XLOC_019968	H2az	1vs<1	SPLICING	0	-Inf
chr3	49055833	49056017	-	DALRD3	DALRD3	H3k4me1	1vs<1	TSSS	0.00014094054104579	-10.9008824681292
chr3	121902530	121902659	+	CASR	CASR	H3k4me1	1vs<1	TSSS	0	-Inf
chr3	138066625	138067167	+	MRAS	MRAS	H3k4me1	1vs<1	TSSS	0.0100630904301517	-5.34254294342119
chr3	193924037	193924096	-	XLOC_020230	XLOC_020230	H3k4me1	1vs<1	TSSS	0	-Inf
chr3	197476624	197476945	+	FYTTD1	FYTTD1	H3k4me1	1vs<1	TSSS	0.0013780661206801	-7.53336932957272
chr3	197686716	197686886	-	IQCG	IQCG	H3k4me1	1vs<1	TSSS	0.000192294488907083	-10.3983452076778
chr3	38070997	38071154	-	PLCD1	PLCD1	H3k4me2	1vs<1	TSSS	0.0221561487617146	4.80206206309129
chr3	48471417	48471460	-	PLXNB1	PLXNB1	H3k4me2	1vs<1	TSSS	0.0231644606182679	-4.74440135658382
chr3	49055833	49056017	-	DALRD3	DALRD3	H3k4me2	1vs<1	TSSS	0.0111172886078853	-5.58976438487055
chr3	57113254	57113336	-	ARHGEF3	ARHGEF3	H3k4me2	1vs<1	TSSS	0.03186083059142	-4.35238840403545
chr3	79067557	79068609	-	ROBO1	ROBO1	H3k4me2	1vs<1	TSSS	5.87097575364127e-06	19.3193889422145
chr3	111717586	111717961	+	TAGLN3	TAGLN3	H3k4me2	1vs<1	TSSS	0.0107365864680949	8.05809717518741
chr3	127541927	127542051	-	MGLL	MGLL	H3k4me2	1vs<1	TSSS	0.00558143029408997	-7.23043506720579
chr3	128997684	128997748	+	C3orf37	C3orf37	H3k4me2	1vs<1	TSSS	0.0313596968499987	-4.38993028611856
chr3	138327542	138327779	+	FAIM	FAIM	H3k4me2	1vs<1	TSSS	0.0418809552200349	-4.06114995485445
chr3	193924037	193924096	-	XLOC_020230	XLOC_020230	H3k4me2	1vs<1	TSSS	0	-Inf
chr3	197686716	197686886	-	IQCG	IQCG	H3k4me2	1vs<1	TSSS	0.000407339117414659	-10.7827151752719
chr3	38070997	38071154	-	PLCD1	PLCD1	H3k4me3	1vs<1	TSSS	0.0128952539178867	4.83620564917036
chr3	48471417	48471460	-	PLXNB1	PLXNB1	H3k4me3	1vs<1	TSSS	0.00171690064347158	-7.47607949847483
chr3	50604894	50605223	-	C3orf18	C3orf18	H3k4me3	1vs<1	TSSS	0.00243496756836773	-6.84698500768117
chr3	52567522	52567793	-	NT5DC2	NT5DC2	H3k4me3	1vs<1	TSSS	0.010685787168252	-5.05022152715781
chr3	53079832	53080089	-	SFMBT1	SFMBT1	H3k4me3	1vs<1	TSSS	0.00243496756836773	-6.84066913772312
chr3	57113254	57113336	-	ARHGEF3	ARHGEF3	H3k4me3	1vs<1	TSSS	0.00186015137704243	-7.29945350640252
chr3	79067557	79068609	-	ROBO1	ROBO1	H3k4me3	1vs<1	TSSS	1.19079966254521e-05	16.3094961134689
chr3	111717586	111717961	+	TAGLN3	TAGLN3	H3k4me3	1vs<1	TSSS	0.0119881788974039	6.68032831064585
chr3	127541927	127542051	-	MGLL	MGLL	H3k4me3	1vs<1	TSSS	0.0087108964018562	-5.67864688078261
chr3	128997684	128997748	+	C3orf37	C3orf37	H3k4me3	1vs<1	TSSS	0.00186015137704243	-7.28027987772322
chr3	138066625	138067167	+	MRAS	MRAS	H3k4me3	1vs<1	TSSS	0.00100681241212961	8.19094222284922
chr3	184053717	184053911	+	FAM131A	FAM131A	H3k4me3	1vs<1	TSSS	0.014758577054755	-4.70936151407889
chr3	197463526	197463773	-	KIAA0226	KIAA0226	H3k4me3	1vs<1	TSSS	0.0166828272591917	-4.58762971541048
chr3	197686716	197686886	-	IQCG	IQCG	H3k4me3	1vs<1	TSSS	0.000465743982540614	-9.3386888944952
chr3	48471417	48471460	-	PLXNB1	PLXNB1	H3k9ac	1vs<1	TSSS	0.000137191584229765	-11.0902051763092
chr3	50604894	50605223	-	C3orf18	C3orf18	H3k9ac	1vs<1	TSSS	0.0183003018834541	-4.36262539686475
chr3	52567522	52567793	-	NT5DC2	NT5DC2	H3k9ac	1vs<1	TSSS	0.016136294744553	-4.5033270991925
chr3	53079832	53080089	-	SFMBT1	SFMBT1	H3k9ac	1vs<1	TSSS	2.88510949993357e-07	-26.87122229959
chr3	57113254	57113336	-	ARHGEF3	ARHGEF3	H3k9ac	1vs<1	TSSS	8.09531364878327e-05	-12.2556482470784
chr3	79067557	79068609	-	ROBO1	ROBO1	H3k9ac	1vs<1	TSSS	0.000178151890206558	10.5735318155593
chr3	111717586	111717961	+	TAGLN3	TAGLN3	H3k9ac	1vs<1	TSSS	0.0426792333505962	4.47164499754336
chr3	127541927	127542051	-	MGLL	MGLL	H3k9ac	1vs<1	TSSS	0.00949402509591333	-5.42045391126705
chr3	128997684	128997748	+	C3orf37	C3orf37	H3k9ac	1vs<1	TSSS	0.000198446152084475	-10.3801158252841
chr3	132379140	132379542	+	UBA5	UBA5	H3k9ac	1vs<1	TSSS	0.00589322447771175	5.55577436909431
chr3	138066625	138067167	+	MRAS	MRAS	H3k9ac	1vs<1	TSSS	0.000392453187352301	9.11124791731494
chr3	193924037	193924096	-	XLOC_020230	XLOC_020230	H3k9ac	1vs<1	TSSS	0	-Inf
chr3	197463526	197463773	-	KIAA0226	KIAA0226	H3k9ac	1vs<1	TSSS	0.0034099132242099	-6.13849829213181
chr3	197476624	197476945	+	FYTTD1	FYTTD1	H3k9ac	1vs<1	TSSS	0.0126700550377142	-4.75883971152502
chr3	197686716	197686886	-	IQCG	IQCG	H3k9ac	1vs<1	TSSS	0.00814092676543642	-5.24118135431078
chr3	48471417	48471460	-	PLXNB1	PLXNB1	H4k20me1	1vs<1	TSSS	0	-Inf
chr3	48471417	48471460	-	PLXNB1	PLXNB1	H3k27ac	1vs<1	TSSS	7.81946901944902e-05	-11.6813801369555
chr3	50604894	50605223	-	C3orf18	C3orf18	H3k27ac	1vs<1	TSSS	0.000282547902835527	-9.55791517606604
chr3	52567522	52567793	-	NT5DC2	NT5DC2	H3k27ac	1vs<1	TSSS	0.0182632193857016	-4.36375083424992
chr3	53079832	53080089	-	SFMBT1	SFMBT1	H3k27ac	1vs<1	TSSS	3.76929659986748e-06	-18.7582284510545
chr3	57113254	57113336	-	ARHGEF3	ARHGEF3	H3k27ac	1vs<1	TSSS	0	-Inf
chr3	69788586	69788852	+	MITF	MITF	H3k27ac	1vs<1	TSSS	0.0451344107195331	3.61706947416887
chr3	79067557	79068609	-	ROBO1	ROBO1	H3k27ac	1vs<1	TSSS	0.00243923354695928	6.41786397994775
chr3	128997684	128997748	+	C3orf37	C3orf37	H3k27ac	1vs<1	TSSS	0.000257635028261945	-9.71047254881944
chr3	132379140	132379542	+	UBA5	UBA5	H3k27ac	1vs<1	TSSS	0.0386384346059825	3.75216375196952
chr3	138066625	138067167	+	MRAS	MRAS	H3k27ac	1vs<1	TSSS	0.00860396749887153	5.06027466054842
chr3	138327542	138327779	+	FAIM	FAIM	H3k27ac	1vs<1	TSSS	0.00594232545983549	5.44496593770249
chr3	184053717	184053911	+	FAM131A	FAM131A	H3k27ac	1vs<1	TSSS	0.021066748306294	-4.24051572727678
chr3	186648315	186648623	+	ST6GAL1	ST6GAL1	H3k27ac	1vs<1	TSSS	0.0224416433527871	-4.42364386724352
chr3	193924037	193924096	-	XLOC_020230	XLOC_020230	H3k27ac	1vs<1	TSSS	0	-Inf
chr3	197463526	197463773	-	KIAA0226	KIAA0226	H3k27ac	1vs<1	TSSS	0.0072117638522605	-5.25035474648837
chr3	197476624	197476945	+	FYTTD1	FYTTD1	H3k27ac	1vs<1	TSSS	0.0493135277471814	-3.53511261553782
chr3	197686716	197686886	-	IQCG	IQCG	H3k27ac	1vs<1	TSSS	0.00265040295664233	-6.30587713084564
chr3	138066625	138067167	+	MRAS	MRAS	H3k27me3	1vs<1	TSSS	0	-Inf
chr3	148415658	148415914	+	AGTR1	AGTR1	H3k27me3	1vs<1	TSSS	0	-Inf
chr3	170136653	170137080	+	CLDN11	CLDN11	H3k27me3	1vs<1	TSSS	0.0252365138442137	7.25334790620952
chr3	129599152	129599402	-	TMCC1	TMCC1	H3k36me3	1vs<1	TSSS	0.00447900570215852	-6.21242056346741
chr3	50604894	50605223	-	C3orf18	C3orf18	H3k79me2	1vs<1	TSSS	0	-Inf
chr3	129599152	129599402	-	TMCC1	TMCC1	H3k79me2	1vs<1	TSSS	0.012205348081835	-5.62969275324025
chr3	132379140	132379542	+	UBA5	UBA5	H3k79me2	1vs<1	TSSS	0.0174041773883206	5.18688365855753
chr3	197686716	197686886	-	IQCG	IQCG	H3k79me2	1vs<1	TSSS	0.000543887438485511	-9.12553964225064
chr3	15900884	15901053	-	ANKRD28	ANKRD28	H2az	1vs<1	TSSS	1.24153650019826e-05	16.5620413146977
chr3	48471417	48471460	-	PLXNB1	PLXNB1	H2az	1vs<1	TSSS	0.00151615002837284	-8.07955804296259
chr3	49055833	49056017	-	DALRD3	DALRD3	H2az	1vs<1	TSSS	0.0216872498204415	-4.63648503826681
chr3	52567522	52567793	-	NT5DC2	NT5DC2	H2az	1vs<1	TSSS	0.0363103635046529	-4.12115518086158
chr3	57113254	57113336	-	ARHGEF3	ARHGEF3	H2az	1vs<1	TSSS	0.017017012006954	-5.03107335708123
chr3	58457376	58457445	+	XLOC_018963	XLOC_018963	H2az	1vs<1	TSSS	0	-Inf
chr3	79067557	79068609	-	ROBO1	ROBO1	H2az	1vs<1	TSSS	0.000311654311903216	10.5528707900707
chr3	111717586	111717961	+	TAGLN3	TAGLN3	H2az	1vs<1	TSSS	0.0245695925055506	5.86248770297061
chr3	121902530	121902659	+	CASR	CASR	H2az	1vs<1	TSSS	0	-Inf
chr3	127541927	127542051	-	MGLL	MGLL	H2az	1vs<1	TSSS	0.017017012006954	-5.34870270230021
chr3	136581050	136581161	+	NCK1	NCK1	H2az	1vs<1	TSSS	0.00179608176928678	7.81597997572088
chr3	138066625	138067167	+	MRAS	MRAS	H2az	1vs<1	TSSS	0.0324452026568391	4.24243802292162
chr3	184053717	184053911	+	FAM131A	FAM131A	H2az	1vs<1	TSSS	0.0441164961708835	-3.89702291453776
chr3	197476624	197476945	+	FYTTD1	FYTTD1	H2az	1vs<1	TSSS	0.0368601002727341	-4.10274787510114
chr3	197686716	197686886	-	IQCG	IQCG	H2az	1vs<1	TSSS	2.12622357674899e-06	-20.9283402082397
chr4	15480847	15480952	+	CC2D2A	CC2D2A	H3k4me2	0vs>0	SPLICING	0.000135435533198062	-11.6264865090452
chr4	107183255	107183369	-	TBCK	TBCK	H3k4me2	1vs<1	SPLICING	0	-Inf
chr4	15480847	15480952	+	CC2D2A	CC2D2A	H3k4me3	0vs>0	SPLICING	0.000885675346518818	-8.47378924228512
chr4	114274201	114280455	+	ANK2	ANK2	H3k4me3	0vs>0	SPLICING	0.0112832449505757	-5.14054246747325
chr4	15480847	15480952	+	CC2D2A	CC2D2A	H3k9ac	0vs>0	SPLICING	0.00348371659284713	-6.51528276363489
chr4	1316169	1316291	+	MAEA	MAEA	H3k9me3	1vs<1	SPLICING	0	-Inf
chr4	99807605	99807697	-	EIF4E	EIF4E	H4k20me1	0vs>0	SPLICING	0	-Inf
chr4	15480847	15480952	+	CC2D2A	CC2D2A	H3k27ac	0vs>0	SPLICING	0.0056226031615048	-5.93769072063013
chr4	99807605	99807697	-	EIF4E	EIF4E	H3k36me3	0vs>0	SPLICING	0	-Inf
chr4	166149959	166150065	+	KLHL2	KLHL2	H3k36me3	1vs<1	SPLICING	0	-Inf
chr4	38870019	38870167	+	FAM114A1	FAM114A1	H3k79me2	1vs<1	SPLICING	0.00309632098806115	6.62012355277851
chr4	107183255	107183369	-	TBCK	TBCK	H3k79me2	1vs<1	SPLICING	0	-Inf
chr4	15480847	15480952	+	CC2D2A	CC2D2A	H2az	0vs>0	SPLICING	0.000111690541565822	-11.4055539278935
chr4	114274201	114280455	+	ANK2	ANK2	H2az	0vs>0	SPLICING	0.0221864402977809	-4.54167523863837
chr4	40631413	40631883	-	RBM47	RBM47	H3k4me1	1vs<1	TSSS	0.000370132311569023	-9.41799034156547
chr4	87374183	87374283	-	MAPK10	MAPK10	H3k4me1	1vs<1	TSSS	0	-Inf
chr4	2420012	2420370	-	ZFYVE28	ZFYVE28	H3k4me2	1vs<1	TSSS	0.0229397657596931	4.763351198141
chr4	81106424	81106672	+	PRDM8	PRDM8	H3k4me2	1vs<1	TSSS	0.00982417451749914	6.28114058605443
chr4	109088711	109090112	-	LEF1	LEF1	H3k4me2	1vs<1	TSSS	0.0447029406822608	4.52651494587957
chr4	166128770	166129054	+	KLHL2	KLHL2	H3k4me2	1vs<1	TSSS	0.0477542103203822	3.91714566721624
chr4	189376732	189376828	+	LOC401164	LOC401164	H3k4me2	1vs<1	TSSS	0	-Inf
chr4	2010477	2010959	-	MIR943	MIR943	H3k4me3	1vs<1	TSSS	0.022609618284046	4.2829852790998
chr4	2420012	2420370	-	ZFYVE28	ZFYVE28	H3k4me3	1vs<1	TSSS	0.0466034961854929	-3.54510898177363
chr4	81106424	81106672	+	PRDM8	PRDM8	H3k4me3	1vs<1	TSSS	0.00799486108196764	5.79419415091408
chr4	109088711	109090112	-	LEF1	LEF1	H3k4me3	1vs<1	TSSS	0.022609618284046	4.90182933471139
chr4	120549675	120549981	-	PDE5A	PDE5A	H3k4me3	1vs<1	TSSS	0.000198432186599999	10.8851754602104
chr4	130017282	130017364	+	C4orf33	C4orf33	H3k4me3	1vs<1	TSSS	0.0362433357428279	3.78502737726321
chr4	151936354	151936436	-	LRBA	LRBA	H3k4me3	1vs<1	TSSS	0.0242784163111437	4.18660939129163
chr4	153456093	153456172	-	FBXW7	FBXW7	H3k4me3	1vs<1	TSSS	0.022609618284046	-4.27037283678341
chr4	157997277	157997449	+	GLRB	GLRB	H3k4me3	1vs<1	TSSS	0.00194325225644983	11.3939480170721
chr4	165304339	165304407	-	MARCH1	MARCH1	H3k4me3	1vs<1	TSSS	0	-Inf
chr4	171011295	171011372	-	AADAT	AADAT	H3k4me3	1vs<1	TSSS	0.0255788293161444	4.36070710082753
chr4	189376732	189376828	+	LOC401164	LOC401164	H3k4me3	1vs<1	TSSS	0	-Inf
chr4	2420012	2420370	-	ZFYVE28	ZFYVE28	H3k9ac	1vs<1	TSSS	0.0085147159283264	-5.18777654740382
chr4	91048684	91048982	+	FAM190A	FAM190A	H3k9ac	1vs<1	TSSS	0.00880498080764629	-13.4916321104345
chr4	109088711	109090112	-	LEF1	LEF1	H3k9ac	1vs<1	TSSS	0.028888942689076	4.48014904964392
chr4	120549675	120549981	-	PDE5A	PDE5A	H3k9ac	1vs<1	TSSS	0.00550583762590803	5.62326654645368
chr4	130017282	130017364	+	C4orf33	C4orf33	H3k9ac	1vs<1	TSSS	0.000605456414085694	8.3285626872291
chr4	153456093	153456172	-	FBXW7	FBXW7	H3k9ac	1vs<1	TSSS	0.016136294744553	-4.50883349206625
chr4	165304339	165304407	-	MARCH1	MARCH1	H3k9ac	1vs<1	TSSS	0	-Inf
chr4	166128770	166129054	+	KLHL2	KLHL2	H3k9ac	1vs<1	TSSS	0.038845478508998	-3.71626336041444
chr4	169753156	169753322	+	PALLD	PALLD	H3k9ac	1vs<1	TSSS	8.11224261731042e-05	-17.9149243153576
chr4	171011295	171011372	-	AADAT	AADAT	H3k9ac	1vs<1	TSSS	0.0266064017229235	4.2510730868276
chr4	189376732	189376828	+	LOC401164	LOC401164	H3k9ac	1vs<1	TSSS	0	-Inf
chr4	190470757	190470860	+	XLOC_020955	XLOC_020955	H3k9me3	1vs<1	TSSS	0	-Inf
chr4	11685078	11685113	+	XLOC_020371	XLOC_020371	H4k20me1	1vs<1	TSSS	0	-Inf
chr4	2420012	2420370	-	ZFYVE28	ZFYVE28	H3k27ac	1vs<1	TSSS	0.00149796835161375	-6.95237713246718
chr4	36283244	36283651	+	DTHD1	DTHD1	H3k27ac	1vs<1	TSSS	0	-Inf
chr4	130017282	130017364	+	C4orf33	C4orf33	H3k27ac	1vs<1	TSSS	0.00436013907365714	5.76476672670622
chr4	153456093	153456172	-	FBXW7	FBXW7	H3k27ac	1vs<1	TSSS	0.0282393873140584	-3.99470984231877
chr4	169753156	169753322	+	PALLD	PALLD	H3k27ac	1vs<1	TSSS	0.0175412251796179	-5.0785687852743
chr4	189376732	189376828	+	LOC401164	LOC401164	H3k27ac	1vs<1	TSSS	0	-Inf
chr4	6473887	6474326	-	PPP2R2C	PPP2R2C	H3k27me3	1vs<1	TSSS	0.00070761854614962	-9.89068184570411
chr4	40631413	40631883	-	RBM47	RBM47	H3k27me3	1vs<1	TSSS	0.0174820533201124	-5.25536880391959
chr4	40631413	40631883	-	RBM47	RBM47	H2az	1vs<1	TSSS	0.0216872498204415	-4.62844931134966
chr4	81106424	81106672	+	PRDM8	PRDM8	H2az	1vs<1	TSSS	0.0116835632684756	5.92947606316464
chr4	109088711	109090112	-	LEF1	LEF1	H2az	1vs<1	TSSS	0.000484856484118354	13.5828134466129
chr4	130017282	130017364	+	C4orf33	C4orf33	H2az	1vs<1	TSSS	0.00139132227724241	8.21748815738935
chr4	165304339	165304407	-	MARCH1	MARCH1	H2az	1vs<1	TSSS	0.00892593709671499	-5.80723156728613
chr4	171011295	171011372	-	AADAT	AADAT	H2az	1vs<1	TSSS	0.0352056038898607	4.39661254486519
chr4	189376732	189376828	+	LOC401164	LOC401164	H2az	1vs<1	TSSS	0	-Inf
chr5	112074050	112074157	+	APC	APC	H3k4me1	0vs>0	SPLICING	0.00171118716097623	-7.08435006906436
chr5	176880957	176881041	+	PRR7	PRR7	H3k4me1	0vs>0	SPLICING	0.0046473095024168	6.00936314724564
chr5	141980267	141980370	-	FGF1	FGF1	H3k4me1	1vs<1	SPLICING	0	-Inf
chr5	175786814	175786921	-	KIAA1191	KIAA1191	H3k4me1	1vs<1	SPLICING	0.00222716586107433	-6.86094201344696
chr5	179271152	179271227	-	C5orf45	C5orf45	H3k4me1	1vs<1	SPLICING	0	-Inf
chr5	112074050	112074157	+	APC	APC	H3k4me2	0vs>0	SPLICING	0.00459289719542186	-5.86467860998769
chr5	52095719	52096954	+	ITGA1	ITGA1	H3k4me2	1vs<1	SPLICING	0.0322307782754151	-4.3927383611372
chr5	79286417	79286486	-	MTX3	MTX3	H3k4me2	1vs<1	SPLICING	0.000124636178336636	10.4008695731119
chr5	112074050	112074157	+	APC	APC	H3k4me3	0vs>0	SPLICING	0.00307753412516794	-6.24894271984595
chr5	79286417	79286486	-	MTX3	MTX3	H3k4me3	1vs<1	SPLICING	7.17521478089239e-05	11.1169374964852
chr5	141980267	141980370	-	FGF1	FGF1	H3k4me3	1vs<1	SPLICING	0	-Inf
chr5	79286417	79286486	-	MTX3	MTX3	H3k9ac	1vs<1	SPLICING	0.0454009330774459	3.78152610375226
chr5	150282703	150282744	-	ZNF300	ZNF300	H3k9me3	1vs<1	SPLICING	0	-Inf
chr5	179271152	179271227	-	C5orf45	C5orf45	H3k9me3	1vs<1	SPLICING	0	-Inf
chr5	52095719	52096954	+	ITGA1	ITGA1	H4k20me1	1vs<1	SPLICING	0.0119776311811318	-5.03215783266877
chr5	93294482	93294673	-	FAM172A	FAM172A	H4k20me1	1vs<1	SPLICING	0	-Inf
chr5	112090570	112090722	+	APC	APC	H4k20me1	1vs<1	SPLICING	0.0119776311811318	-5.04397004413374
chr5	179271152	179271227	-	C5orf45	C5orf45	H4k20me1	1vs<1	SPLICING	0	-Inf
chr5	112074050	112074157	+	APC	APC	H3k27ac	0vs>0	SPLICING	0.00312509001869158	-6.09914621233588
chr5	141350269	141350442	+	RNF14	RNF14	H3k27ac	1vs<1	SPLICING	0.0056284259353212	-5.75624944452922
chr5	68858500	68858597	+	GTF2H2C	GTF2H2C	H3k79me2	0vs>0	SPLICING	0	-Inf
chr5	112074050	112074157	+	APC	APC	H3k79me2	0vs>0	SPLICING	0.00202104653355046	-6.81401517258065
chr5	131310586	131310663	-	ACSL6	ACSL6	H3k79me2	0vs>0	SPLICING	0	-Inf
chr5	130651669	130651837	+	CDC42SE2	CDC42SE2	H3k79me2	1vs<1	SPLICING	0.0250837238157608	-4.54302172463673
chr5	112074050	112074157	+	APC	APC	H2az	0vs>0	SPLICING	0.00257407337606331	-6.25691693147972
chr5	79286417	79286486	-	MTX3	MTX3	H2az	1vs<1	SPLICING	0.000841068022618636	7.37619735376377
chr5	141350269	141350442	+	RNF14	RNF14	H2az	1vs<1	SPLICING	5.66069506816677e-05	-10.8214300214567
chr5	37370923	37371197	-	NUP155	NUP155	H3k4me1	1vs<1	TSSS	0	-Inf
chr5	37370923	37371197	-	NUP155	NUP155	H3k4me2	1vs<1	TSSS	0.000573566956098749	-10.1076465088638
chr5	94982583	94983778	+	RFESD	RFESD	H3k4me2	1vs<1	TSSS	0.0107365864680949	-5.65410656748387
chr5	112073556	112073622	+	APC	APC	H3k4me2	1vs<1	TSSS	0.036535881091577	-4.18760013456607
chr5	131563483	131563556	-	P4HA2	P4HA2	H3k4me2	1vs<1	TSSS	0.0313596968499987	-4.37312143612649
chr5	146833112	146833260	-	DPYSL3	DPYSL3	H3k4me2	1vs<1	TSSS	0.0235494433251202	5.01203048918255
chr5	149109815	149109983	+	PPARGC1B	PPARGC1B	H3k4me2	1vs<1	TSSS	0.00542770589900497	6.66587752791067
chr5	175298501	175298708	+	CPLX2	CPLX2	H3k4me2	1vs<1	TSSS	0	-Inf
chr5	16616761	16617118	-	FAM134B	FAM134B	H3k4me3	1vs<1	TSSS	0.0333482516911207	4.09104592969002
chr5	36241601	36241900	-	C5orf33	C5orf33	H3k4me3	1vs<1	TSSS	0.0127283170131351	-4.87646912178365
chr5	37370923	37371197	-	NUP155	NUP155	H3k4me3	1vs<1	TSSS	0.000641974252283778	-8.74476268437531
chr5	75013131	75013313	-	POC5	POC5	H3k4me3	1vs<1	TSSS	0.035563858622867	-3.81339677965502
chr5	94982583	94983778	+	RFESD	RFESD	H3k4me3	1vs<1	TSSS	0.00617571731732236	-5.69373540369481
chr5	112073556	112073622	+	APC	APC	H3k4me3	1vs<1	TSSS	0.00381203496784244	-6.27329483308181
chr5	146833112	146833260	-	DPYSL3	DPYSL3	H3k4me3	1vs<1	TSSS	0.0242452579379743	4.44151017158701
chr5	149109815	149109983	+	PPARGC1B	PPARGC1B	H3k4me3	1vs<1	TSSS	0.00243496756836773	6.83565195543819
chr5	175298501	175298708	+	CPLX2	CPLX2	H3k4me3	1vs<1	TSSS	0	-Inf
chr5	36241601	36241900	-	C5orf33	C5orf33	H3k9ac	1vs<1	TSSS	0.000351192283068126	-9.27836354137536
chr5	38556436	38556748	-	LIFR	LIFR	H3k9ac	1vs<1	TSSS	0.0179303346804403	-4.6710075846704
chr5	75013131	75013313	-	POC5	POC5	H3k9ac	1vs<1	TSSS	0.000701944867080723	-8.08111944945109
chr5	112073556	112073622	+	APC	APC	H3k9ac	1vs<1	TSSS	0.00167957405481723	-6.9913276582878
chr5	150138421	150138657	-	DCTN4	DCTN4	H3k9ac	1vs<1	TSSS	0.0126700550377142	-4.75234063371359
chr5	175298501	175298708	+	CPLX2	CPLX2	H3k9ac	1vs<1	TSSS	0	-Inf
chr5	176560080	176560155	+	NSD1	NSD1	H3k9ac	1vs<1	TSSS	0.0457361470931336	3.57705557944326
chr5	176937261	176937427	-	DOK3	DOK3	H4k20me1	1vs<1	TSSS	0	-Inf
chr5	36241601	36241900	-	C5orf33	C5orf33	H3k27ac	1vs<1	TSSS	0.000531482156757573	-8.50875930314376
chr5	37370923	37371197	-	NUP155	NUP155	H3k27ac	1vs<1	TSSS	0.00673656236914608	-5.33147748442566
chr5	38556436	38556748	-	LIFR	LIFR	H3k27ac	1vs<1	TSSS	0.00698859001951829	-5.69212443626185
chr5	75013131	75013313	-	POC5	POC5	H3k27ac	1vs<1	TSSS	0.000442156937021795	-8.77482008500658
chr5	112073556	112073622	+	APC	APC	H3k27ac	1vs<1	TSSS	0.000635414063050817	-8.23564902964486
chr5	131563483	131563556	-	P4HA2	P4HA2	H3k27ac	1vs<1	TSSS	0.00822198899542822	5.11177400988572
chr5	132166286	132166590	-	SHROOM1	SHROOM1	H3k27ac	1vs<1	TSSS	0.0493135277471814	3.53557523282594
chr5	150138421	150138657	-	DCTN4	DCTN4	H3k27ac	1vs<1	TSSS	0.00416057628219496	-5.85498736354662
chr5	175298501	175298708	+	CPLX2	CPLX2	H3k27ac	1vs<1	TSSS	0	-Inf
chr5	131563483	131563556	-	P4HA2	P4HA2	H3k27me3	1vs<1	TSSS	0	-Inf
chr5	37370923	37371197	-	NUP155	NUP155	H3k36me3	1vs<1	TSSS	0	-Inf
chr5	176937261	176937427	-	DOK3	DOK3	H3k36me3	1vs<1	TSSS	0.0109503041395497	-5.09242168924587
chr5	112073556	112073622	+	APC	APC	H3k79me2	1vs<1	TSSS	9.84129684227868e-05	-11.9095478771616
chr5	37370923	37371197	-	NUP155	NUP155	H2az	1vs<1	TSSS	0.000826046906879552	-8.97012767563627
chr5	94982583	94983778	+	RFESD	RFESD	H2az	1vs<1	TSSS	0.0251123824295677	-4.449470500341
chr5	112073556	112073622	+	APC	APC	H2az	1vs<1	TSSS	0.0225773696871155	-4.5648383372838
chr5	146833112	146833260	-	DPYSL3	DPYSL3	H2az	1vs<1	TSSS	0.0336743299196455	4.44220114615572
chr5	176560080	176560155	+	NSD1	NSD1	H2az	1vs<1	TSSS	0.0211627718773322	4.67518997260288
chr6	4130413	4130483	-	PECI	PECI	H3k4me1	0vs>0	SPLICING	0	-Inf
chr6	135818326	135818387	-	AHI1	AHI1	H3k4me1	1vs<1	SPLICING	0	-Inf
chr6	33383012	33383106	+	PHF1	PHF1	H3k4me2	1vs<1	SPLICING	0	-Inf
chr6	139133975	139134114	+	ECT2L	ECT2L	H3k4me3	0vs>0	SPLICING	0	-Inf
chr6	161519310	161519459	+	MAP3K4	MAP3K4	H3k4me3	0vs>0	SPLICING	0	-Inf
chr6	161519310	161519459	+	MAP3K4	MAP3K4	H3k9ac	0vs>0	SPLICING	0	-Inf
chr6	26388241	26388522	+	BTN2A2	BTN2A2	H3k9ac	1vs<1	SPLICING	0	-Inf
chr6	28198114	28198266	+	ZNF193	ZNF193	H3k9me3	0vs>0	SPLICING	0	-Inf
chr6	137477896	137477991	-	IL22RA2	IL22RA2	H3k9me3	0vs>0	SPLICING	0	-Inf
chr6	161519310	161519459	+	MAP3K4	MAP3K4	H3k9me3	0vs>0	SPLICING	0	-Inf
chr6	26388241	26388522	+	BTN2A2	BTN2A2	H3k9me3	1vs<1	SPLICING	0	-Inf
chr6	41908108	41908323	-	CCND3	CCND3	H3k9me3	1vs<1	SPLICING	0	-Inf
chr6	161519310	161519459	+	MAP3K4	MAP3K4	H4k20me1	0vs>0	SPLICING	0	-Inf
chr6	26388241	26388522	+	BTN2A2	BTN2A2	H4k20me1	1vs<1	SPLICING	0	-Inf
chr6	37348926	37349130	+	RNF8	RNF8	H4k20me1	1vs<1	SPLICING	0.000102506668801364	-10.3407342501906
chr6	4130413	4130483	-	PECI	PECI	H3k27ac	0vs>0	SPLICING	0	-Inf
chr6	10685082	10685156	-	C6orf52	C6orf52	H3k27me3	1vs<1	SPLICING	0	-Inf
chr6	161519310	161519459	+	MAP3K4	MAP3K4	H3k36me3	0vs>0	SPLICING	0.0302670133266976	-4.55057527898053
chr6	7246657	7247454	+	RREB1	RREB1	H3k36me3	1vs<1	SPLICING	0.0237882222785914	-4.79883057629973
chr6	33383012	33383106	+	PHF1	PHF1	H3k36me3	1vs<1	SPLICING	0.01377931827591	-5.40779103642974
chr6	57015517	57015660	+	ZNF451	ZNF451	H3k36me3	1vs<1	SPLICING	0.00609133146194716	-6.3364454828171
chr6	15660614	15660752	-	DTNBP1	DTNBP1	H3k79me2	0vs>0	SPLICING	0.000927521603125605	-7.70524760370549
chr6	28198114	28198266	+	ZNF193	ZNF193	H3k79me2	0vs>0	SPLICING	0.000222610158745781	-9.56189421933197
chr6	107351229	107351311	+	C6orf203	C6orf203	H3k79me2	0vs>0	SPLICING	0.00408921210426849	-5.94569778979157
chr6	114283531	114283558	-	HDAC2	HDAC2	H3k79me2	0vs>0	SPLICING	0.0121110107206279	-4.90426612130565
chr6	130370901	130370975	+	L3MBTL3	L3MBTL3	H3k79me2	0vs>0	SPLICING	0	-Inf
chr6	26388241	26388522	+	BTN2A2	BTN2A2	H3k79me2	1vs<1	SPLICING	0.000252070757723497	-9.78216276948386
chr6	33383012	33383106	+	PHF1	PHF1	H3k79me2	1vs<1	SPLICING	0.0298984334081962	-4.23741507475171
chr6	72128392	72128457	-	C6orf155	C6orf155	H3k79me2	1vs<1	SPLICING	0.00220937407093039	-10.9678173048901
chr6	31895732	31895941	+	C2	C2	H2az	0vs>0	SPLICING	0.0405751816459262	-4.69606683867384
chr6	73000382	73000564	+	RIMS1	RIMS1	H2az	0vs>0	SPLICING	0	-Inf
chr6	10685082	10685156	-	C6orf52	C6orf52	H2az	1vs<1	SPLICING	0	-Inf
chr6	117591706	117592227	+	VGLL2	VGLL2	H2az	1vs<1	SPLICING	0	-Inf
chr6	10555949	10557575	+	GCNT2	GCNT2	H3k4me1	1vs<1	TSSS	0.0231689895913292	-4.58255690874373
chr6	43423725	43423786	-	DLK2	DLK2	H3k4me1	1vs<1	TSSS	0.00614535140232053	-5.9238365657937
chr6	111926979	111927474	-	TRAF3IP2	TRAF3IP2	H3k4me1	1vs<1	TSSS	0.0177564159650779	-4.81913239023584
chr6	152011631	152011799	+	ESR1	ESR1	H3k4me1	1vs<1	TSSS	0	-Inf
chr6	152011631	152011799	+	ESR1	ESR1	H3k4me2	1vs<1	TSSS	0.0115944330842755	-6.64764341383614
chr6	163148164	163148311	+	PACRG	PACRG	H3k4me2	1vs<1	TSSS	0.0345759397292435	5.4603534586683
chr6	10694936	10695030	-	C6orf52	C6orf52	H3k4me3	1vs<1	TSSS	0.00746242535963919	-5.43991748777557
chr6	41909190	41909552	-	CCND3	CCND3	H3k4me3	1vs<1	TSSS	0.0237238854816904	-4.22572562798757
chr6	43395292	43395495	+	ABCC10	ABCC10	H3k4me3	1vs<1	TSSS	0.00920344447921548	-5.21087565860777
chr6	43603577	43603658	+	MAD2L1BP	MAD2L1BP	H3k4me3	1vs<1	TSSS	0.0302482029565587	3.97572467363347
chr6	46703287	46703430	-	PLA2G7	PLA2G7	H3k4me3	1vs<1	TSSS	0.0333482516911207	7.63713928428306
chr6	112375278	112375364	+	WISP3	WISP3	H3k4me3	1vs<1	TSSS	0.0437041425979631	-4.4297228153625
chr6	152011631	152011799	+	ESR1	ESR1	H3k4me3	1vs<1	TSSS	0.000641974252283778	-11.7879626959681
chr6	10694936	10695030	-	C6orf52	C6orf52	H3k9ac	1vs<1	TSSS	0.0072176844657952	-5.37556239608914
chr6	41909190	41909552	-	CCND3	CCND3	H3k9ac	1vs<1	TSSS	5.07951842221704e-05	-13.1005456291653
chr6	43395292	43395495	+	ABCC10	ABCC10	H3k9ac	1vs<1	TSSS	0.00057498361799507	-8.40923677329655
chr6	43603577	43603658	+	MAD2L1BP	MAD2L1BP	H3k9ac	1vs<1	TSSS	0.0470201489716493	3.54539248774523
chr6	125474879	125475116	+	TPD52L1	TPD52L1	H3k9ac	1vs<1	TSSS	0.00279577323362573	-9.54345515301498
chr6	136871480	136871957	-	MAP7	MAP7	H3k9ac	1vs<1	TSSS	0.0111957130599979	-5.21974985768346
chr6	152011631	152011799	+	ESR1	ESR1	H3k9ac	1vs<1	TSSS	0.000344973024463952	-12.8067597311002
chr6	41909190	41909552	-	CCND3	CCND3	H3k9me3	1vs<1	TSSS	0	-Inf
chr6	10694936	10695030	-	C6orf52	C6orf52	H3k27ac	1vs<1	TSSS	0.000725912351825943	-8.04385376336523
chr6	41909190	41909552	-	CCND3	CCND3	H3k27ac	1vs<1	TSSS	0.000985578016977453	-7.51347544558626
chr6	43395292	43395495	+	ABCC10	ABCC10	H3k27ac	1vs<1	TSSS	0.000794105631404636	-7.82070143524557
chr6	43603577	43603658	+	MAD2L1BP	MAD2L1BP	H3k27ac	1vs<1	TSSS	0.0288426921058804	3.97426974740465
chr6	152011631	152011799	+	ESR1	ESR1	H3k27ac	1vs<1	TSSS	0	-Inf
chr6	43423725	43423786	-	DLK2	DLK2	H3k27me3	1vs<1	TSSS	0.0183589018598959	-5.180272419469
chr6	41909190	41909552	-	CCND3	CCND3	H3k79me2	1vs<1	TSSS	0.0498580968935037	-4.0211072737693
chr6	43395292	43395495	+	ABCC10	ABCC10	H3k79me2	1vs<1	TSSS	0	-Inf
chr6	10555949	10557575	+	GCNT2	GCNT2	H2az	1vs<1	TSSS	0.00389016568179993	-6.74819621725018
chr6	41909190	41909552	-	CCND3	CCND3	H2az	1vs<1	TSSS	0.00285616986677554	-7.19375053150713
chr6	43423725	43423786	-	DLK2	DLK2	H2az	1vs<1	TSSS	0.00432636837040568	-6.54930719226996
chr6	105584468	105584543	-	BVES	BVES	H2az	1vs<1	TSSS	0.0225559405623525	-5.31595324890329
chr6	105627708	105627858	-	POPDC3	POPDC3	H2az	1vs<1	TSSS	0.0387798052169324	4.25938748934378
chr6	152011631	152011799	+	ESR1	ESR1	H2az	1vs<1	TSSS	0.00310139579582073	-8.97485496055218
chr7	76240771	76240908	-	POMZP3	POMZP3	H3k4me1	0vs>0	SPLICING	0	-Inf
chr7	92214612	92214710	-	FAM133B	FAM133B	H3k4me1	0vs>0	SPLICING	0	-Inf
chr7	99270407	99270538	-	CYP3A5	CYP3A5	H3k4me1	1vs<1	SPLICING	0.000641848571583184	-9.36016581760688
chr7	856917	857136	+	SUN1	SUN1	H3k4me3	0vs>0	SPLICING	0.00346147937193243	-6.06463274476041
chr7	6474393	6474651	-	DAGLB	DAGLB	H3k4me3	1vs<1	SPLICING	0.0316406262906431	-4.2458459713926
chr7	856917	857136	+	SUN1	SUN1	H3k9ac	0vs>0	SPLICING	0.00247406226571583	-6.33198451962627
chr7	14028893	14029089	-	ETV1	ETV1	H3k9ac	0vs>0	SPLICING	0.0144067798393297	-5.35957460677985
chr7	56146057	56146201	+	SUMF2	SUMF2	H3k9ac	1vs<1	SPLICING	0	-Inf
chr7	6438293	6438349	+	RAC1	RAC1	H4k20me1	0vs>0	SPLICING	0	-Inf
chr7	36554078	36554196	-	AOAH	AOAH	H4k20me1	0vs>0	SPLICING	0	-Inf
chr7	76240771	76240908	-	POMZP3	POMZP3	H4k20me1	0vs>0	SPLICING	0	-Inf
chr7	856917	857136	+	SUN1	SUN1	H3k27ac	0vs>0	SPLICING	0.00638147931073675	-5.3618358703885
chr7	14028893	14029089	-	ETV1	ETV1	H3k27ac	0vs>0	SPLICING	0.0186973758017712	-5.15498072877207
chr7	36554078	36554196	-	AOAH	AOAH	H3k27ac	0vs>0	SPLICING	0	-Inf
chr7	76240771	76240908	-	POMZP3	POMZP3	H3k27me3	0vs>0	SPLICING	0	-Inf
chr7	6438293	6438349	+	RAC1	RAC1	H3k36me3	0vs>0	SPLICING	0.00425659323969736	-6.49223578635529
chr7	30537357	30537512	-	GGCT	GGCT	H3k36me3	0vs>0	SPLICING	0.00625753360934489	-6.08502915138441
chr7	36554078	36554196	-	AOAH	AOAH	H3k36me3	0vs>0	SPLICING	0	-Inf
chr7	76240771	76240908	-	POMZP3	POMZP3	H3k36me3	0vs>0	SPLICING	7.85534768324539e-05	-11.7431689980126
chr7	5028694	5028808	+	RNF216L	RNF216L	H3k36me3	1vs<1	SPLICING	0.00746189806277804	-6.06756223501647
chr7	6470111	6470238	-	DAGLB	DAGLB	H3k36me3	1vs<1	SPLICING	0.0119171322931784	-5.57473107109074
chr7	56146057	56146201	+	SUMF2	SUMF2	H3k36me3	1vs<1	SPLICING	0.0487215586573709	-4.17602243011611
chr7	64852815	64852941	+	ZNF92	ZNF92	H3k36me3	1vs<1	SPLICING	0.00335574476588712	-7.1288456551357
chr7	92195328	92195375	-	FAM133B	FAM133B	H3k36me3	1vs<1	SPLICING	0.00021486094598854	-10.7265777424495
chr7	30537357	30537512	-	GGCT	GGCT	H3k79me2	0vs>0	SPLICING	0.000384669905084097	-8.81681647461452
chr7	76240771	76240908	-	POMZP3	POMZP3	H3k79me2	0vs>0	SPLICING	1.26372967202932e-05	-14.3028859611818
chr7	76241039	76241130	-	POMZP3	POMZP3	H3k79me2	0vs>0	SPLICING	0	-Inf
chr7	116831689	116831815	+	ST7	ST7	H3k79me2	0vs>0	SPLICING	0	-Inf
chr7	65592691	65592727	+	CRCP	CRCP	H3k79me2	1vs<1	SPLICING	0.0191271767835407	-4.81590979060305
chr7	116140314	116140501	+	CAV2	CAV2	H3k79me2	1vs<1	SPLICING	0.0247531814810532	5.30723787375266
chr7	155093276	155093400	+	INSIG1	INSIG1	H3k79me2	1vs<1	SPLICING	0.000103983182574377	11.0829081468356
chr7	856917	857136	+	SUN1	SUN1	H2az	0vs>0	SPLICING	0.00257407337606331	-6.24475297624302
chr7	14028893	14029089	-	ETV1	ETV1	H2az	0vs>0	SPLICING	7.60623316591118e-05	-15.172144103748
chr7	28725721	28725814	+	CREB5	CREB5	H3k4me1	1vs<1	TSSS	0.00108986163869925	-8.8265727004271
chr7	136553399	136553739	+	CHRM2	CHRM2	H3k4me1	1vs<1	TSSS	0	-Inf
chr7	28725721	28725814	+	CREB5	CREB5	H3k4me2	1vs<1	TSSS	0.00444897711564905	-7.77399235838277
chr7	77428109	77428288	+	PHTF2	PHTF2	H3k4me2	1vs<1	TSSS	0.0422083859172152	4.0413407291359
chr7	134464164	134464500	+	CALD1	CALD1	H3k4me2	1vs<1	TSSS	0.0493101244310129	-4.38846921074432
chr7	150974163	150974231	-	SMARCD3	SMARCD3	H3k4me2	1vs<1	TSSS	0.00901694775130897	-5.92143117581493
chr7	28725721	28725814	+	CREB5	CREB5	H3k4me3	1vs<1	TSSS	0.00184941735536531	-8.14057474871672
chr7	77428109	77428288	+	PHTF2	PHTF2	H3k4me3	1vs<1	TSSS	0.0115254332132141	4.97874858659507
chr7	129251555	129251665	+	NRF1	NRF1	H3k4me3	1vs<1	TSSS	0.0242490030818443	-4.19297185601669
chr7	143059669	143059840	-	FAM131B	FAM131B	H3k4me3	1vs<1	TSSS	0.0289072375255507	4.23214845842577
chr7	151106322	151106468	+	LOC100131176	LOC100131176	H3k4me3	1vs<1	TSSS	0.0362433357428279	-7.29137216413762
chr7	151573592	151574316	-	PRKAG2	PRKAG2	H3k4me3	1vs<1	TSSS	0.0289072375255507	-4.01508927336595
chr7	116593381	116593745	+	ST7	ST7	H3k9ac	1vs<1	TSSS	0.0468695285104028	-3.55600204716796
chr7	129251555	129251665	+	NRF1	NRF1	H3k9ac	1vs<1	TSSS	0.000537676075880889	-8.53125993892149
chr7	150974163	150974231	-	SMARCD3	SMARCD3	H3k9ac	1vs<1	TSSS	0.00338663251980923	-6.15580714087536
chr7	151573592	151574316	-	PRKAG2	PRKAG2	H3k9ac	1vs<1	TSSS	0.0266064017229235	-4.02615741906416
chr7	116593381	116593745	+	ST7	ST7	H3k27ac	1vs<1	TSSS	0.0381472794761651	-3.76619351229282
chr7	129251555	129251665	+	NRF1	NRF1	H3k27ac	1vs<1	TSSS	0.00122713090444129	-7.22383418639779
chr7	151573592	151574316	-	PRKAG2	PRKAG2	H3k27me3	1vs<1	TSSS	0.0160860303508397	5.3612489856061
chr7	28725721	28725814	+	CREB5	CREB5	H3k79me2	1vs<1	TSSS	0	-Inf
chr7	115850581	115850788	+	TES	TES	H3k79me2	1vs<1	TSSS	0.000508580398706733	-9.51470215398149
chr7	150020558	150020758	-	ACTR3C	ACTR3C	H3k79me2	1vs<1	TSSS	0.0498580968935037	-4.27697386535664
chr7	28725721	28725814	+	CREB5	CREB5	H2az	1vs<1	TSSS	0	-Inf
chr7	30029258	30029425	-	SCRN1	SCRN1	H2az	1vs<1	TSSS	0.02069860487691	-4.72950170450782
chr7	129251555	129251665	+	NRF1	NRF1	H2az	1vs<1	TSSS	0.0154882619807438	-5.19169428873822
chr8	141994177	141994254	-	PTK2	PTK2	H3k4me1	0vs>0	SPLICING	0	-Inf
chr8	30546678	30546836	-	GSR	GSR	H3k4me1	1vs<1	SPLICING	0	-Inf
chr8	105544135	105544191	-	LRP12	LRP12	H3k4me1	1vs<1	SPLICING	0	-Inf
chr8	22900651	22900756	-	TNFRSF10B	TNFRSF10B	H3k4me2	1vs<1	SPLICING	0.000130640951200717	-10.2572946896304
chr8	105544135	105544191	-	LRP12	LRP12	H3k9ac	1vs<1	SPLICING	0	-Inf
chr8	93966634	93966792	-	C8orf83	C8orf83	H3k9me1	1vs<1	SPLICING	0	-Inf
chr8	99101304	99102257	+	C8orf47	C8orf47	H3k9me1	1vs<1	SPLICING	0	-Inf
chr8	22900651	22900756	-	TNFRSF10B	TNFRSF10B	H3k9me3	1vs<1	SPLICING	0	-Inf
chr8	22900651	22900756	-	TNFRSF10B	TNFRSF10B	H4k20me1	1vs<1	SPLICING	0.00387387331822901	-6.11706386493475
chr8	42694329	42694524	-	THAP1	THAP1	H4k20me1	1vs<1	SPLICING	0.00423107172261948	-5.98436221922613
chr8	22900651	22900756	-	TNFRSF10B	TNFRSF10B	H3k27ac	1vs<1	SPLICING	0	-Inf
chr8	105544135	105544191	-	LRP12	LRP12	H3k27ac	1vs<1	SPLICING	0	-Inf
chr8	22900651	22900756	-	TNFRSF10B	TNFRSF10B	H3k36me3	1vs<1	SPLICING	0.00411055375326579	-6.7943642414202
chr8	30546678	30546836	-	GSR	GSR	H3k36me3	1vs<1	SPLICING	0.0218278111661651	-4.91674429442823
chr8	141935760	141935848	-	PTK2	PTK2	H3k36me3	1vs<1	SPLICING	0	-Inf
chr8	29202887	29203591	-	DUSP4	DUSP4	H3k79me2	0vs>0	SPLICING	0.00248868021596102	-8.16818283680567
chr8	144674817	144674830	-	EEF1D	EEF1D	H3k79me2	0vs>0	SPLICING	0.0113961335944336	-4.9756817711515
chr8	22900651	22900756	-	TNFRSF10B	TNFRSF10B	H3k79me2	1vs<1	SPLICING	0.00997156010370838	-5.41692337288407
chr8	27168999	27169226	+	PTK2B	PTK2B	H3k4me1	1vs<1	TSSS	0.000635220965430051	-8.66010074906045
chr8	70378859	70379185	+	SULF1	SULF1	H3k4me1	1vs<1	TSSS	0.00886298438382106	-5.96481055100093
chr8	95229426	95229531	-	CDH17	CDH17	H3k4me1	1vs<1	TSSS	0	-Inf
chr8	143751726	143751986	+	PSCA	PSCA	H3k4me1	1vs<1	TSSS	0.00841749285215824	-6.06869433717678
chr8	19171081	19171334	+	SH2D4A	SH2D4A	H3k4me2	1vs<1	TSSS	0.0406130939610687	4.32951042652586
chr8	37594097	37594196	+	ERLIN2	ERLIN2	H3k4me2	1vs<1	TSSS	0.00113626994335248	-8.92771769595747
chr8	70378859	70379185	+	SULF1	SULF1	H3k4me2	1vs<1	TSSS	0.00764024068803823	-6.81183498797091
chr8	70747089	70747299	-	SLCO5A1	SLCO5A1	H3k4me2	1vs<1	TSSS	0.0358207500222605	4.82131731424126
chr8	95229426	95229531	-	CDH17	CDH17	H3k4me2	1vs<1	TSSS	0	-Inf
chr8	143751726	143751986	+	PSCA	PSCA	H3k4me2	1vs<1	TSSS	0.0313596968499987	-4.64522085355963
chr8	19171081	19171334	+	SH2D4A	SH2D4A	H3k4me3	1vs<1	TSSS	0.0247982729104462	4.39819909662738
chr8	37594097	37594196	+	ERLIN2	ERLIN2	H3k4me3	1vs<1	TSSS	0.00240879858033588	-6.93876357950207
chr8	41348081	41348136	+	GOLGA7	GOLGA7	H3k4me3	1vs<1	TSSS	0.00258060862437209	-6.73257821487705
chr8	59572132	59572404	-	NSMAF	NSMAF	H3k4me3	1vs<1	TSSS	0.00601144182864176	-5.73944485857132
chr8	70378859	70379185	+	SULF1	SULF1	H3k4me3	1vs<1	TSSS	0.0362433357428279	-3.98023828045431
chr8	70747089	70747299	-	SLCO5A1	SLCO5A1	H3k4me3	1vs<1	TSSS	0.00830341416886589	6.36018354735021
chr8	135725088	135725292	-	ZFAT	ZFAT	H3k4me3	1vs<1	TSSS	0.022609618284046	-4.26679086381649
chr8	143751726	143751986	+	PSCA	PSCA	H3k4me3	1vs<1	TSSS	0.00920344447921548	-5.60788379338581
chr8	29207363	29208185	-	DUSP4	DUSP4	H3k9ac	1vs<1	TSSS	0.0111502242878167	-4.93155205686006
chr8	32405728	32406344	+	NRG1	NRG1	H3k9ac	1vs<1	TSSS	0.0205646835360223	4.85307319405737
chr8	37594097	37594196	+	ERLIN2	ERLIN2	H3k9ac	1vs<1	TSSS	2.00079520754631e-05	-15.1700708309194
chr8	41348081	41348136	+	GOLGA7	GOLGA7	H3k9ac	1vs<1	TSSS	0.00352322024564602	-6.09788160180218
chr8	59572132	59572404	-	NSMAF	NSMAF	H3k9ac	1vs<1	TSSS	0.00291469720064475	-6.31684536072536
chr8	70378859	70379185	+	SULF1	SULF1	H3k9ac	1vs<1	TSSS	0.0052678440378633	-6.16739934321523
chr8	135725088	135725292	-	ZFAT	ZFAT	H3k9ac	1vs<1	TSSS	0.0120158086505757	-4.80730590149615
chr8	143751726	143751986	+	PSCA	PSCA	H3k9ac	1vs<1	TSSS	0.00389203654804838	-6.53170178867182
chr8	41348081	41348136	+	GOLGA7	GOLGA7	H4k20me1	1vs<1	TSSS	0	-Inf
chr8	135725088	135725292	-	ZFAT	ZFAT	H4k20me1	1vs<1	TSSS	0	-Inf
chr8	29207363	29208185	-	DUSP4	DUSP4	H3k27ac	1vs<1	TSSS	0.004600400573491	-6.91825162465644
chr8	37594097	37594196	+	ERLIN2	ERLIN2	H3k27ac	1vs<1	TSSS	3.21627344576509e-05	-13.5495384316879
chr8	41348081	41348136	+	GOLGA7	GOLGA7	H3k27ac	1vs<1	TSSS	1.42001459198335e-06	-21.4037272316129
chr8	59572132	59572404	-	NSMAF	NSMAF	H3k27ac	1vs<1	TSSS	0.000323595653532419	-9.32282490795766
chr8	135725088	135725292	-	ZFAT	ZFAT	H3k27ac	1vs<1	TSSS	0.00123445885428764	-7.18220397248065
chr8	143751726	143751986	+	PSCA	PSCA	H3k27ac	1vs<1	TSSS	0.000794105631404636	-8.78729124196703
chr8	29207363	29208185	-	DUSP4	DUSP4	H3k79me2	1vs<1	TSSS	0.0174041773883206	-6.12093859171858
chr8	143751726	143751986	+	PSCA	PSCA	H3k79me2	1vs<1	TSSS	7.12190310823446e-05	-15.0565623787368
chr8	19171081	19171334	+	SH2D4A	SH2D4A	H2az	1vs<1	TSSS	0.0475039754575926	3.95943867274809
chr8	32405728	32406344	+	NRG1	NRG1	H2az	1vs<1	TSSS	0.0216872498204415	5.37518577923311
chr8	37594097	37594196	+	ERLIN2	ERLIN2	H2az	1vs<1	TSSS	0.00135421710816047	-8.29131379002019
chr8	41348081	41348136	+	GOLGA7	GOLGA7	H2az	1vs<1	TSSS	0.00175554372004134	-7.87806344983014
chr8	70378859	70379185	+	SULF1	SULF1	H2az	1vs<1	TSSS	0.0387798052169324	-4.25889846946573
chr8	143751726	143751986	+	PSCA	PSCA	H2az	1vs<1	TSSS	0.0162488945867122	-5.48840953602977
chr9	79074976	79075093	+	GCNT1	GCNT1	H3k4me1	0vs>0	SPLICING	0.000760965262843044	-8.13533941580785
chr9	131871458	131871556	-	CRAT	CRAT	H3k4me1	0vs>0	SPLICING	0.00127126872046021	-7.47711169510373
chr9	131600497	131600646	-	CCBL1	CCBL1	H3k4me1	1vs<1	SPLICING	0	-Inf
chr9	79074976	79075093	+	GCNT1	GCNT1	H3k4me2	0vs>0	SPLICING	0.0360427147681432	-3.94694387126544
chr9	116345730	116346707	+	RGS3	RGS3	H3k4me2	1vs<1	SPLICING	0	-Inf
chr9	124043748	124043840	+	GSN	GSN	H3k4me2	1vs<1	SPLICING	0.0484989379526993	-4.03099392708766
chr9	124115498	124115580	-	STOM	STOM	H3k4me2	1vs<1	SPLICING	0	-Inf
chr9	131600497	131600646	-	CCBL1	CCBL1	H3k4me2	1vs<1	SPLICING	0	-Inf
chr9	124043748	124043840	+	GSN	GSN	H3k4me3	1vs<1	SPLICING	0	-Inf
chr9	124115498	124115580	-	STOM	STOM	H3k4me3	1vs<1	SPLICING	0	-Inf
chr9	79074976	79075093	+	GCNT1	GCNT1	H3k9ac	0vs>0	SPLICING	0.0386248283275665	-3.84447490526742
chr9	116345730	116346707	+	RGS3	RGS3	H3k9ac	1vs<1	SPLICING	0.00156788485508612	-6.90597387333887
chr9	34216672	34216787	+	UBAP1	UBAP1	H4k20me1	0vs>0	SPLICING	0	-Inf
chr9	36198976	36199093	+	CLTA	CLTA	H4k20me1	1vs<1	SPLICING	0.000544102974567684	-8.17120697324868
chr9	131648294	131648400	+	LRRC8A	LRRC8A	H4k20me1	1vs<1	SPLICING	0.00389524611162759	-6.08497516464021
chr9	116345730	116346707	+	RGS3	RGS3	H3k27ac	1vs<1	SPLICING	0.000155956121107048	-10.0781695161239
chr9	124043748	124043840	+	GSN	GSN	H3k27ac	1vs<1	SPLICING	0.009025879152878	-5.26898615415374
chr9	124115498	124115580	-	STOM	STOM	H3k27ac	1vs<1	SPLICING	0	-Inf
chr9	131600497	131600646	-	CCBL1	CCBL1	H3k27ac	1vs<1	SPLICING	0	-Inf
chr9	131891264	131891389	+	PPP2R4	PPP2R4	H3k27ac	1vs<1	SPLICING	0	-Inf
chr9	79074976	79075093	+	GCNT1	GCNT1	H3k27me3	0vs>0	SPLICING	0	-Inf
chr9	131871458	131871556	-	CRAT	CRAT	H3k27me3	0vs>0	SPLICING	0	-Inf
chr9	4722506	4722625	-	AK3	AK3	H3k36me3	1vs<1	SPLICING	0	-Inf
chr9	34220906	34220946	+	UBAP1	UBAP1	H3k36me3	1vs<1	SPLICING	0	-Inf
chr9	86243096	86243126	+	C9orf103	C9orf103	H3k36me3	1vs<1	SPLICING	0	-Inf
chr9	36209264	36209317	+	CLTA	CLTA	H3k79me2	0vs>0	SPLICING	0.0216150499533375	-4.46740771454868
chr9	127055128	127055292	+	NEK6	NEK6	H3k79me2	0vs>0	SPLICING	0.00186664079181288	6.93463645679432
chr9	32550772	32550966	-	TOPORS	TOPORS	H3k79me2	1vs<1	SPLICING	4.27052258162127e-05	13.0913220598134
chr9	36198976	36199093	+	CLTA	CLTA	H3k79me2	1vs<1	SPLICING	0.0250837238157608	-4.50292996495077
chr9	95637297	95637341	-	ZNF484	ZNF484	H3k79me2	1vs<1	SPLICING	9.8158524022148e-05	-11.3329769305321
chr9	131891264	131891389	+	PPP2R4	PPP2R4	H3k79me2	1vs<1	SPLICING	0	-Inf
chr9	32550772	32550966	-	TOPORS	TOPORS	H2az	1vs<1	SPLICING	6.42555921230298e-05	10.5602972478571
chr9	124043748	124043840	+	GSN	GSN	H2az	1vs<1	SPLICING	0	-Inf
chr9	14313481	14314045	-	NFIB	NFIB	H3k4me1	1vs<1	TSSS	0	-Inf
chr9	21994138	21994490	-	CDKN2A	CDKN2A	H3k4me1	1vs<1	TSSS	0.00886298438382106	-5.93899503141331
chr9	71939488	71939546	+	FAM189A2	FAM189A2	H3k4me1	1vs<1	TSSS	0	-Inf
chr9	99329050	99329203	-	CDC14B	CDC14B	H3k4me1	1vs<1	TSSS	0.00129147579569658	-7.63430577464848
chr9	130540870	130541048	-	SH2D3C	SH2D3C	H3k4me1	1vs<1	TSSS	0.000286800453333459	-9.80089744768109
chr9	133589268	133589842	+	ABL1	ABL1	H3k4me1	1vs<1	TSSS	0.0158063117343254	-4.95804835541105
chr9	14313481	14314045	-	NFIB	NFIB	H3k4me2	1vs<1	TSSS	0.0134582797358028	-5.78449888913081
chr9	21994138	21994490	-	CDKN2A	CDKN2A	H3k4me2	1vs<1	TSSS	0.0313596968499987	-4.66907640529887
chr9	87283466	87283700	+	NTRK2	NTRK2	H3k4me2	1vs<1	TSSS	0.0321406664262928	4.97375134111256
chr9	88714326	88714510	-	GOLM1	GOLM1	H3k4me2	1vs<1	TSSS	0.0290210061257875	4.47288149954034
chr9	99329050	99329203	-	CDC14B	CDC14B	H3k4me2	1vs<1	TSSS	0.00764024068803823	-6.2489547542652
chr9	114361619	114361711	-	PTGR1	PTGR1	H3k4me2	1vs<1	TSSS	0.0247589793431047	4.62857500947258
chr9	131451509	131451934	+	SET	SET	H3k4me2	1vs<1	TSSS	0.00464275040352719	-6.90768112011509
chr9	132934857	132935006	+	NCS1	NCS1	H3k4me2	1vs<1	TSSS	0.0449545659649583	-4.19647528459391
chr9	137001210	137001322	+	WDR5	WDR5	H3k4me2	1vs<1	TSSS	0.00174650751560233	-8.35833979402907
chr9	6757641	6758203	+	KDM4C	KDM4C	H3k4me3	1vs<1	TSSS	0.0466602547751362	-3.54032754046862
chr9	34989725	34989828	+	DNAJB5	DNAJB5	H3k4me3	1vs<1	TSSS	0.022609618284046	4.53200964664505
chr9	71939488	71939546	+	FAM189A2	FAM189A2	H3k4me3	1vs<1	TSSS	0.00817683787892551	-7.44286846953573
chr9	87283466	87283700	+	NTRK2	NTRK2	H3k4me3	1vs<1	TSSS	0.0222071359191992	4.98074752857072
chr9	114361619	114361711	-	PTGR1	PTGR1	H3k4me3	1vs<1	TSSS	0.0068761438089996	5.54864385257048
chr9	88714326	88714510	-	GOLM1	GOLM1	H3k9ac	1vs<1	TSSS	0.0143062019681015	4.64321049425439
chr9	99329050	99329203	-	CDC14B	CDC14B	H3k9ac	1vs<1	TSSS	0.0291937853862467	-3.9357161831131
chr9	127020530	127020640	+	NEK6	NEK6	H3k9ac	1vs<1	TSSS	0.0175911382563288	-4.42641973167102
chr9	133589268	133589842	+	ABL1	ABL1	H3k9ac	1vs<1	TSSS	0.000701944867080723	8.06240828964502
chr9	103791031	103791384	+	LPPR1	LPPR1	H4k20me1	1vs<1	TSSS	0	-Inf
chr9	134612792	134612925	-	RAPGEF1	RAPGEF1	H4k20me1	1vs<1	TSSS	0	-Inf
chr9	14313481	14314045	-	NFIB	NFIB	H3k27ac	1vs<1	TSSS	0.00417571511274781	6.34683823951517
chr9	99329050	99329203	-	CDC14B	CDC14B	H3k27me3	1vs<1	TSSS	3.66163406788056e-05	-13.0626958473974
chr9	100263462	100263549	+	TMOD1	TMOD1	H3k27me3	1vs<1	TSSS	0.00945739572105192	-5.85702639481468
chr9	14313481	14314045	-	NFIB	NFIB	H2az	1vs<1	TSSS	0.0466883097105372	-4.01402626322141
chr9	34989725	34989828	+	DNAJB5	DNAJB5	H2az	1vs<1	TSSS	0.017608104925713	4.98583538495241
chr9	77502547	77502636	-	TRPM6	TRPM6	H2az	1vs<1	TSSS	0.0108728634145445	6.04072011899317
chr9	99329050	99329203	-	CDC14B	CDC14B	H2az	1vs<1	TSSS	0.0413627718868539	-3.97069820424432
chr9	114361619	114361711	-	PTGR1	PTGR1	H2az	1vs<1	TSSS	0.017017012006954	5.00572782361134
chr9	127020530	127020640	+	NEK6	NEK6	H2az	1vs<1	TSSS	1.53964025890844e-05	-15.9777479138959
chr9	133589268	133589842	+	ABL1	ABL1	H2az	1vs<1	TSSS	0.0363103635046529	-4.1236329487886
chrX	19364628	19364741	+	PDHA1	PDHA1	H3k4me2	0vs>0	SPLICING	0	-Inf
chrX	48334951	48335056	+	FTSJ1	FTSJ1	H3k4me2	0vs>0	SPLICING	0.010379853542925	-5.08019141949654
chrX	71840575	71840751	-	PHKA1	PHKA1	H3k4me2	0vs>0	SPLICING	0.0308648413677135	4.16650850078424
chrX	48334951	48335056	+	FTSJ1	FTSJ1	H3k4me3	0vs>0	SPLICING	0.00265265946079575	-6.44572454993838
chrX	51637723	51637890	+	MAGED1	MAGED1	H3k4me3	0vs>0	SPLICING	0.00660605313360883	5.81603475565235
chrX	152000178	152000244	+	NSDHL	NSDHL	H3k4me3	0vs>0	SPLICING	0.0164880384576369	-4.44603329338497
chrX	48334951	48335056	+	FTSJ1	FTSJ1	H3k9ac	0vs>0	SPLICING	9.24912365066647e-05	-10.4616913135336
chrX	51637723	51637890	+	MAGED1	MAGED1	H3k9ac	0vs>0	SPLICING	0.00742533670174101	5.67321018878237
chrX	78618920	78619051	-	ITM2A	ITM2A	H3k9ac	1vs<1	SPLICING	0	-Inf
chrX	100872493	100872574	-	ARMCX6	ARMCX6	H3k9ac	1vs<1	SPLICING	0.00274985162389589	6.29049535257099
chrX	19364628	19364741	+	PDHA1	PDHA1	H4k20me1	0vs>0	SPLICING	0	-Inf
chrX	48334951	48335056	+	FTSJ1	FTSJ1	H4k20me1	0vs>0	SPLICING	0	-Inf
chrX	48334951	48335056	+	FTSJ1	FTSJ1	H3k27ac	0vs>0	SPLICING	0.000286078813311379	-8.75261956759657
chrX	152000178	152000244	+	NSDHL	NSDHL	H3k27ac	0vs>0	SPLICING	0.0368261508804852	-3.90514424294763
chrX	51637723	51637890	+	MAGED1	MAGED1	H3k27me3	0vs>0	SPLICING	0	-Inf
chrX	65390400	65390579	+	HEPH	HEPH	H3k27me3	0vs>0	SPLICING	0	-Inf
chrX	71840575	71840751	-	PHKA1	PHKA1	H3k27me3	0vs>0	SPLICING	0.00875299617525146	-5.40183982340905
chrX	7035007	7035075	-	HDHD1	HDHD1	H3k36me3	0vs>0	SPLICING	0	-Inf
chrX	7035007	7035075	-	HDHD1	HDHD1	H3k79me2	0vs>0	SPLICING	0	-Inf
chrX	48334951	48335056	+	FTSJ1	FTSJ1	H3k79me2	0vs>0	SPLICING	0.000221471394770427	-9.63844031627403
chrX	73053073	73053209	-	XIST	XIST	H3k79me2	0vs>0	SPLICING	0.0395063437189571	3.88409723744446
chrX	153741147	153741260	-	FAM3A	FAM3A	H3k79me2	1vs<1	SPLICING	0	-Inf
chrX	48334951	48335056	+	FTSJ1	FTSJ1	H2az	0vs>0	SPLICING	0.00197160553779652	-6.62162886513064
chrX	51637723	51637890	+	MAGED1	MAGED1	H2az	0vs>0	SPLICING	0	-Inf
chrX	100872493	100872574	-	ARMCX6	ARMCX6	H2az	1vs<1	SPLICING	0.00799801671697977	5.12886594058081
chrX	67867511	67867769	+	STARD8	STARD8	H3k4me1	1vs<1	TSSS	0.000899345547444154	-8.17475058818413
chrX	24690687	24690979	-	PCYT1B	PCYT1B	H3k4me2	1vs<1	TSSS	6.80057473795996e-05	-13.9345216553792
chrX	46771868	46772154	+	PHF16	PHF16	H3k4me2	1vs<1	TSSS	0.010113603943553	-5.74207461233846
chrX	67867511	67867769	+	STARD8	STARD8	H3k4me2	1vs<1	TSSS	0.00439810020181411	-7.07888445094079
chrX	69672155	69672605	+	DLG3	DLG3	H3k4me2	1vs<1	TSSS	0.0241700602780684	-4.66787781425336
chrX	15518900	15519063	+	BMX	BMX	H3k4me3	1vs<1	TSSS	0.0167642730754468	-7.36751221434428
chrX	24690687	24690979	-	PCYT1B	PCYT1B	H3k4me3	1vs<1	TSSS	2.51982141494127e-05	-14.7063828363397
chrX	67867511	67867769	+	STARD8	STARD8	H3k4me3	1vs<1	TSSS	0.000641974252283778	-8.76903703481449
chrX	152110215	152110374	+	ZNF185	ZNF185	H3k4me3	1vs<1	TSSS	0.0128952539178867	5.18732485323311
chrX	153775004	153775233	-	G6PD	G6PD	H3k4me3	1vs<1	TSSS	0.0224234976879152	-4.30242065412711
chrX	154114409	154114577	-	F8	F8	H3k4me3	1vs<1	TSSS	0	-Inf
chrX	15518900	15519063	+	BMX	BMX	H3k9ac	1vs<1	TSSS	0	-Inf
chrX	24690687	24690979	-	PCYT1B	PCYT1B	H3k9ac	1vs<1	TSSS	0	-Inf
chrX	67867511	67867769	+	STARD8	STARD8	H3k9ac	1vs<1	TSSS	0.000414162189764746	-8.92346951562896
chrX	153775004	153775233	-	G6PD	G6PD	H3k9ac	1vs<1	TSSS	0.000820244610039012	-7.85376146187079
chrX	66763874	66766604	+	AR	AR	H3k9me1	1vs<1	TSSS	0	-Inf
chrX	15518900	15519063	+	BMX	BMX	H3k27ac	1vs<1	TSSS	0.00262046927131423	-12.6343767220635
chrX	24690687	24690979	-	PCYT1B	PCYT1B	H3k27ac	1vs<1	TSSS	0	-Inf
chrX	67867511	67867769	+	STARD8	STARD8	H3k27ac	1vs<1	TSSS	0.000635414063050817	-8.24096043767516
chrX	102631268	102631541	+	NGFRAP1	NGFRAP1	H3k27ac	1vs<1	TSSS	0.0398586793360661	-3.90968133482226
chrX	153775004	153775233	-	G6PD	G6PD	H3k27ac	1vs<1	TSSS	0.000362947205388232	-9.09350443017898
chrX	154114409	154114577	-	F8	F8	H3k27ac	1vs<1	TSSS	0	-Inf
chrX	69672155	69672605	+	DLG3	DLG3	H3k27me3	1vs<1	TSSS	2.23858162632256e-05	-14.0420946131835
chrX	15518900	15519063	+	BMX	BMX	H3k79me2	1vs<1	TSSS	0	-Inf
chrX	153775004	153775233	-	G6PD	G6PD	H3k79me2	1vs<1	TSSS	0.000208698919197667	-10.6706787157407
chrX	67867511	67867769	+	STARD8	STARD8	H2az	1vs<1	TSSS	0.0121505270031629	-5.43882223531424
chrX	101410831	101410986	-	BEX5	BEX5	H2az	1vs<1	TSSS	0.0471384018448722	3.99943950768259
chrX	105969894	105970627	+	RNF128	RNF128	H2az	1vs<1	TSSS	0.0471384018448722	7.2903973073861
chrX	107682588	107682704	-	COL4A6	COL4A6	H2az	1vs<1	TSSS	0.0162488945867122	-5.48465254414344
chrX	153775004	153775233	-	G6PD	G6PD	H2az	1vs<1	TSSS	0.017017012006954	-4.99090969684554
chrY	2803112	2803487	+	ZFY	ZFY	H3k9ac	1vs<1	TSSS	0.0102720770999966	-12.561927801029
chrY	2803112	2803487	+	ZFY	ZFY	H3k27ac	1vs<1	TSSS	0.0221866036653918	-8.88176784984178

## Sheet: Helas3
Chr	Start	End	Strand	GeneID	GeneName	Histone	Comparison	SplicingOrTsss	PVal	Statistic
chr1	26438951	26439141	+	PDIK1L	PDIK1L	H3k4me1	0vs>0	SPLICING	0.040649294988997	-4.39166632111544
chr1	53372191	53372283	-	ECHDC2	ECHDC2	H3k4me1	0vs>0	SPLICING	0	-Inf
chr1	212587240	212587422	-	TMEM206	TMEM206	H3k4me1	0vs>0	SPLICING	0.0161412293641896	-5.24933860776761
chr1	204946809	204946853	+	NFASC	NFASC	H3k4me1	1vs<1	SPLICING	0	-Inf
chr1	1355432	1355972	-	LOC441869	LOC441869	H3k4me2	0vs>0	SPLICING	0.00163898508665972	7.13701549077254
chr1	26438951	26439141	+	PDIK1L	PDIK1L	H3k4me2	0vs>0	SPLICING	0.0299458437268338	-4.26170219064323
chr1	161008341	161008463	-	TSTD1	TSTD1	H3k4me2	0vs>0	SPLICING	0.0138385742048027	4.92107280178037
chr1	206810220	206810313	+	DYRK3	DYRK3	H3k4me2	0vs>0	SPLICING	0.009750571775803	-5.69254301819778
chr1	212587240	212587422	-	TMEM206	TMEM206	H3k4me2	0vs>0	SPLICING	0.0415944760449603	-3.88245776403824
chr1	242012414	242012518	+	EXO1	EXO1	H3k4me2	0vs>0	SPLICING	0.000215387643679887	9.6345504653733
chr1	1355432	1355972	-	LOC441869	LOC441869	H3k4me3	0vs>0	SPLICING	0.0225465808578678	4.75849584906268
chr1	161008341	161008463	-	TSTD1	TSTD1	H3k4me3	0vs>0	SPLICING	0.0225465808578678	4.71519639980979
chr1	212587240	212587422	-	TMEM206	TMEM206	H3k4me3	0vs>0	SPLICING	0.0237863975381809	-4.55569931823155
chr1	242012414	242012518	+	EXO1	EXO1	H3k4me3	0vs>0	SPLICING	0.00423639393498898	6.28466047852911
chr1	212587240	212587422	-	TMEM206	TMEM206	H3k9ac	0vs>0	SPLICING	0.0141191360115017	-4.78744598209861
chr1	26438951	26439141	+	PDIK1L	PDIK1L	H4k20me1	0vs>0	SPLICING	0	-Inf
chr1	212587240	212587422	-	TMEM206	TMEM206	H4k20me1	0vs>0	SPLICING	1.02440682242542e-05	-15.0300512575237
chr1	68947729	68948580	-	DEPDC1	DEPDC1	H3k27ac	0vs>0	SPLICING	0	-Inf
chr1	182638759	182638887	-	RGS8	RGS8	H3k27me3	0vs1	SPLICING	0	-Inf
chr1	17939553	17939669	+	ARHGEF10L	ARHGEF10L	H3k27me3	0vs>0	SPLICING	0.000388559537212669	-8.85666158998186
chr1	87598347	87598546	+	LOC339524	LOC339524	H3k27me3	0vs>0	SPLICING	0.00402669151062643	-6.21454904809402
chr1	6522923	6523030	-	PLEKHG5	PLEKHG5	H3k27me3	1vs<1	SPLICING	0	-Inf
chr1	145822814	145822859	-	GPR89A	GPR89A	H3k36me3	0vs>0	SPLICING	0	-Inf
chr1	221912276	221913129	-	DUSP10	DUSP10	H3k36me3	1vs<1	SPLICING	0.0257052171505314	-5.98813763305924
chr1	42789355	42789498	-	FOXJ3	FOXJ3	H3k79me2	0vs>0	SPLICING	0.0212286446779267	-5.28148819728871
chr1	212587240	212587422	-	TMEM206	TMEM206	H3k79me2	0vs>0	SPLICING	0.0336124243675522	-4.73456729503585
chr1	221912276	221913129	-	DUSP10	DUSP10	H3k79me2	1vs<1	SPLICING	0.0210999436123258	-5.72410451538063
chr1	176197321	176197385	+	XLOC_001101	XLOC_001101	H2az	0vs1	SPLICING	0	-Inf
chr1	1355432	1355972	-	LOC441869	LOC441869	H2az	0vs>0	SPLICING	0.00803755940795189	5.05055078987008
chr1	161008341	161008463	-	TSTD1	TSTD1	H2az	0vs>0	SPLICING	0.0367682249034969	3.81690654744937
chr1	32716840	32716972	+	LCK	LCK	H3k4me1	1vs<1	TSSS	0.00462683633030649	-6.63674117262484
chr1	44496978	44497134	-	SLC6A9	SLC6A9	H3k4me1	1vs<1	TSSS	9.60842472288108e-05	-11.2818573831058
chr1	178062864	178063829	+	RASAL2	RASAL2	H3k4me1	1vs<1	TSSS	0.000254445662297215	-9.65257652611279
chr1	212731196	212732111	+	XLOC_001289	XLOC_001289	H3k4me1	1vs<1	TSSS	0.000363850690679063	9.07120747027558
chr1	31885963	31886151	+	SERINC2	SERINC2	H3k4me2	1vs<1	TSSS	0.00342143261299201	6.84449179120993
chr1	32716840	32716972	+	LCK	LCK	H3k4me2	1vs<1	TSSS	0	-Inf
chr1	34632624	34632772	+	C1orf94	C1orf94	H3k4me2	1vs<1	TSSS	0	-Inf
chr1	86043667	86044046	-	DDAH1	DDAH1	H3k4me2	1vs<1	TSSS	0.00246144263575706	8.18548059676389
chr1	173793276	173793777	-	CENPL	CENPL	H3k4me2	1vs<1	TSSS	9.543032205185e-05	-12.6729327616193
chr1	178062864	178063829	+	RASAL2	RASAL2	H3k4me2	1vs<1	TSSS	0.000556710094527393	-9.53577695003426
chr1	235491869	235492093	+	GGPS1	GGPS1	H3k4me2	1vs<1	TSSS	0.00768512867429527	-5.73932034299517
chr1	31885963	31886151	+	SERINC2	SERINC2	H3k4me3	1vs<1	TSSS	1.26524276915668e-06	22.3347530954858
chr1	32716840	32716972	+	LCK	LCK	H3k4me3	1vs<1	TSSS	0	-Inf
chr1	34632624	34632772	+	C1orf94	C1orf94	H3k4me3	1vs<1	TSSS	0	-Inf
chr1	61542946	61543300	+	NFIA	NFIA	H3k4me3	1vs<1	TSSS	0.0132433752507091	5.03843732648743
chr1	86043667	86044046	-	DDAH1	DDAH1	H3k4me3	1vs<1	TSSS	0.00696871702523243	6.27887369432169
chr1	173793276	173793777	-	CENPL	CENPL	H3k4me3	1vs<1	TSSS	0.0423563936107681	-3.78865323579691
chr1	201476198	201476387	-	CSRP1	CSRP1	H3k4me3	1vs<1	TSSS	0.00298190130387085	6.85708411665316
chr1	242687899	242687998	-	PLD5	PLD5	H3k4me3	1vs<1	TSSS	0	-Inf
chr1	31885963	31886151	+	SERINC2	SERINC2	H3k9ac	1vs<1	TSSS	0.000406271246273635	10.6097432803506
chr1	32716840	32716972	+	LCK	LCK	H3k9ac	1vs<1	TSSS	0.000298043468736742	-13.0242414729639
chr1	34632624	34632772	+	C1orf94	C1orf94	H3k9ac	1vs<1	TSSS	0	-Inf
chr1	86043667	86044046	-	DDAH1	DDAH1	H3k9ac	1vs<1	TSSS	0.0345113465982305	4.61890192549146
chr1	91487547	91487671	-	ZNF644	ZNF644	H3k9ac	1vs<1	TSSS	0.00382072722495242	-7.23155358409376
chr1	100315640	100315971	+	AGL	AGL	H3k9ac	1vs<1	TSSS	0.00118706674637802	-8.99752828873282
chr1	21995747	21995856	-	RAP1GAP	RAP1GAP	H3k9me3	1vs<1	TSSS	0	-Inf
chr1	154841508	154842754	-	KCNN3	KCNN3	H3k9me3	1vs<1	TSSS	0	-Inf
chr1	32716840	32716972	+	LCK	LCK	H3k27ac	1vs<1	TSSS	1.10782142572882e-05	-20.8037001689201
chr1	33207512	33207790	+	KIAA1522	KIAA1522	H3k27ac	1vs<1	TSSS	0.00454223535462937	-6.96534866225488
chr1	34632624	34632772	+	C1orf94	C1orf94	H3k27ac	1vs<1	TSSS	0	-Inf
chr1	61542946	61543300	+	NFIA	NFIA	H3k27ac	1vs<1	TSSS	0.0197515375433972	4.9747776827329
chr1	89990397	89990581	+	LRRC8B	LRRC8B	H3k27ac	1vs<1	TSSS	0.0104026210068065	5.64673308192141
chr1	91487547	91487671	-	ZNF644	ZNF644	H3k27ac	1vs<1	TSSS	0.00707969311712143	-6.26276599968892
chr1	156786467	156786640	-	SH2D2A	SH2D2A	H3k27ac	1vs<1	TSSS	0.00178574626367325	11.1317769034308
chr1	173793276	173793777	-	CENPL	CENPL	H3k27ac	1vs<1	TSSS	0.0428178082202574	4.16608674776811
chr1	178062864	178063829	+	RASAL2	RASAL2	H3k27ac	1vs<1	TSSS	0.036847961845508	4.33827043175798
chr1	212731196	212732111	+	XLOC_001289	XLOC_001289	H3k27ac	1vs<1	TSSS	0.0245755730120869	4.75170404994206
chr1	235491869	235492093	+	GGPS1	GGPS1	H3k27ac	1vs<1	TSSS	0.00929956770385091	-5.90423953338986
chr1	17308009	17308081	-	MFAP2	MFAP2	H3k27me3	1vs<1	TSSS	0	-Inf
chr1	154841508	154842754	-	KCNN3	KCNN3	H3k27me3	1vs<1	TSSS	0.029143258414825	-4.52422148018349
chr1	178062864	178063829	+	RASAL2	RASAL2	H3k27me3	1vs<1	TSSS	0.000648099231900256	-8.68321745738467
chr1	183387318	183387737	-	NMNAT2	NMNAT2	H3k27me3	1vs<1	TSSS	0.00119226215968072	7.87285503295693
chr1	212731196	212732111	+	XLOC_001289	XLOC_001289	H3k27me3	1vs<1	TSSS	0.0190527413996159	-4.94601256689871
chr1	32716840	32716972	+	LCK	LCK	H3k79me2	1vs<1	TSSS	0	-Inf
chr1	91487547	91487671	-	ZNF644	ZNF644	H3k79me2	1vs<1	TSSS	0.0313307100233114	-4.9626709786988
chr1	32716840	32716972	+	LCK	LCK	H2az	1vs<1	TSSS	0.00462024632006083	-7.55151578082604
chr1	44496978	44497134	-	SLC6A9	SLC6A9	H2az	1vs<1	TSSS	0.0196606621612887	-4.96878121056281
chr1	108507288	108507545	-	VAV3	VAV3	H2az	1vs<1	TSSS	0.0327958378474645	4.35810850002816
chr1	212731196	212732111	+	XLOC_001289	XLOC_001289	H2az	1vs<1	TSSS	0.00199845368723372	8.19053504182817
chr1	215178885	215179298	+	KCNK2	KCNK2	H2az	1vs<1	TSSS	0.0208721057643907	5.72988832501115
chr10	100221507	100221576	-	HPSE2	HPSE2	H3k4me1	0vs>0	SPLICING	0	-Inf
chr10	72100309	72100458	-	LRRC20	LRRC20	H3k4me1	1vs<1	SPLICING	0	-Inf
chr10	60760106	60760263	+	XLOC_003145	XLOC_003145	H3k4me2	0vs>0	SPLICING	0	-Inf
chr10	76971240	76971417	+	VDAC2	VDAC2	H3k4me2	0vs>0	SPLICING	0.0389613023465818	-4.03946884716395
chr10	62547818	62547988	+	CDK1	CDK1	H3k9ac	1vs<1	SPLICING	0.000896368138313709	-7.81382631610915
chr10	90767457	90767594	+	FAS	FAS	H3k9me1	1vs<1	SPLICING	0	-Inf
chr10	73111319	73111545	+	SLC29A3	SLC29A3	H4k20me1	1vs<1	SPLICING	0	-Inf
chr10	60760106	60760263	+	XLOC_003145	XLOC_003145	H3k27ac	0vs>0	SPLICING	0	-Inf
chr10	75599297	75599359	-	CAMK2G	CAMK2G	H3k27ac	0vs>0	SPLICING	0	-Inf
chr10	62547818	62547988	+	CDK1	CDK1	H3k27ac	1vs<1	SPLICING	0	-Inf
chr10	129913192	129914271	-	MKI67	MKI67	H3k27ac	1vs<1	SPLICING	0	-Inf
chr10	24831812	24833410	+	KIAA1217	KIAA1217	H3k27me3	0vs>0	SPLICING	0	-Inf
chr10	72100309	72100458	-	LRRC20	LRRC20	H3k27me3	1vs<1	SPLICING	0.00389142996530801	-6.00430011516859
chr10	73111319	73111545	+	SLC29A3	SLC29A3	H3k27me3	1vs<1	SPLICING	0	-Inf
chr10	13386758	13387028	-	SEPHS1	SEPHS1	H3k79me2	1vs<1	SPLICING	0.000125853567268226	12.6577656617245
chr10	24831812	24833410	+	KIAA1217	KIAA1217	H2az	0vs>0	SPLICING	0	-Inf
chr10	99393762	99393913	-	MORN4	MORN4	H3k4me1	1vs<1	TSSS	0	-Inf
chr10	7708766	7708961	-	ITIH5	ITIH5	H3k4me2	1vs<1	TSSS	0.0323106220002115	-4.23929828370887
chr10	90750696	90751147	-	ACTA2	ACTA2	H3k4me2	1vs<1	TSSS	0.00596211441718695	-6.13354674312188
chr10	99393762	99393913	-	MORN4	MORN4	H3k4me2	1vs<1	TSSS	0.0244896370851337	-4.48926341726061
chr10	104503727	104503900	+	C10orf26	C10orf26	H3k4me2	1vs<1	TSSS	0.0323106220002115	4.4604691448784
chr10	104613967	104614184	+	AS3MT	AS3MT	H3k4me2	1vs<1	TSSS	0.0204899978883416	-4.66807049992348
chr10	6019368	6019574	-	IL15RA	IL15RA	H3k4me3	1vs<1	TSSS	0.0141697524469123	-4.89854312582721
chr10	7708766	7708961	-	ITIH5	ITIH5	H3k4me3	1vs<1	TSSS	0.000801240392872354	-8.52930103475512
chr10	30024680	30024730	-	SVIL	SVIL	H3k4me3	1vs<1	TSSS	0.00459898694856664	6.2764242961555
chr10	104613967	104614184	+	AS3MT	AS3MT	H3k4me3	1vs<1	TSSS	0.00242867867876141	-7.18248030744526
chr10	105845481	105845638	-	COL17A1	COL17A1	H3k4me3	1vs<1	TSSS	0.00733786546172302	-6.19010426571809
chr10	7708766	7708961	-	ITIH5	ITIH5	H3k9ac	1vs<1	TSSS	0	-Inf
chr10	81664654	81664805	+	LOC100288974	LOC100288974	H3k9ac	1vs<1	TSSS	0.0345113465982305	4.36411163674863
chr10	88728188	88728362	+	AGAP11	AGAP11	H3k9ac	1vs<1	TSSS	0.0165108699091372	-5.26883162342235
chr10	104613967	104614184	+	AS3MT	AS3MT	H3k9ac	1vs<1	TSSS	0.029306726090833	-4.51427344612524
chr10	105845481	105845638	-	COL17A1	COL17A1	H3k9ac	1vs<1	TSSS	0.00685701823313874	-7.10623523901225
chr10	112678879	112679124	-	BBIP1	BBIP1	H3k9ac	1vs<1	TSSS	0.0315430312635156	4.6120965409097
chr10	31608101	31608221	+	ZEB1	ZEB1	H3k27ac	1vs<1	TSSS	0.024287369136217	-5.61193700129799
chr10	88728188	88728362	+	AGAP11	AGAP11	H3k27ac	1vs<1	TSSS	0.0279807503516503	-4.61073807798771
chr10	105845481	105845638	-	COL17A1	COL17A1	H3k27ac	1vs<1	TSSS	0.00580182138178088	-7.27736345031919
chr10	62149183	62149488	-	ANK3	ANK3	H3k27me3	1vs<1	TSSS	0	-Inf
chr10	33247073	33247293	-	ITGB1	ITGB1	H3k79me2	1vs<1	TSSS	0	-Inf
chr10	105845481	105845638	-	COL17A1	COL17A1	H3k79me2	1vs<1	TSSS	0.0285160752593254	-5.53870412197407
chr10	33247073	33247293	-	ITGB1	ITGB1	H2az	1vs<1	TSSS	0.00330056136444562	-7.4140937422341
chr10	81664654	81664805	+	LOC100288974	LOC100288974	H2az	1vs<1	TSSS	0.00462024632006083	6.77162335275204
chr11	58877013	58877179	+	FAM111B	FAM111B	H3k4me1	0vs>0	SPLICING	0	-Inf
chr11	85340176	85340306	+	TMEM126B	TMEM126B	H3k4me1	0vs>0	SPLICING	0	-Inf
chr11	104763624	104763718	-	CASP12	CASP12	H3k4me1	0vs>0	SPLICING	0	-Inf
chr11	129992200	129992408	+	APLP2	APLP2	H3k4me1	1vs<1	SPLICING	0.000679292826172533	-9.5301549664997
chr11	104763624	104763718	-	CASP12	CASP12	H3k4me2	0vs>0	SPLICING	0	-Inf
chr11	60268518	60268655	+	MS4A12	MS4A12	H3k9ac	0vs>0	SPLICING	0	-Inf
chr11	71502785	71502865	+	FAM86C	FAM86C	H3k9ac	0vs>0	SPLICING	0	-Inf
chr11	85340176	85340306	+	TMEM126B	TMEM126B	H3k9ac	0vs>0	SPLICING	0.0161320461862094	4.54423919941589
chr11	104763624	104763718	-	CASP12	CASP12	H3k9ac	0vs>0	SPLICING	0	-Inf
chr11	71712247	71712370	+	IL18BP	IL18BP	H3k9me1	1vs<1	SPLICING	0	-Inf
chr11	60268518	60268655	+	MS4A12	MS4A12	H3k27ac	0vs>0	SPLICING	0	-Inf
chr11	104763624	104763718	-	CASP12	CASP12	H3k27ac	0vs>0	SPLICING	0	-Inf
chr11	70267576	70267686	+	CTTN	CTTN	H3k27me3	0vs>0	SPLICING	0	-Inf
chr11	118402865	118403176	+	TMEM25	TMEM25	H3k27me3	1vs<1	SPLICING	0	-Inf
chr11	118896402	118896467	-	SLC37A4	SLC37A4	H3k36me3	0vs>0	SPLICING	2.84409225601282e-05	-13.7241511077356
chr11	8751497	8752756	-	ST5	ST5	H2az	0vs>0	SPLICING	0.00196590560992793	-6.39496866280289
chr11	58877013	58877179	+	FAM111B	FAM111B	H2az	0vs>0	SPLICING	0	-Inf
chr11	104763624	104763718	-	CASP12	CASP12	H2az	0vs>0	SPLICING	0	-Inf
chr11	1874200	1874427	+	LSP1	LSP1	H3k4me1	1vs<1	TSSS	0	-Inf
chr11	31839357	31839509	-	PAX6	PAX6	H3k4me1	1vs<1	TSSS	0.00854973293870891	-5.39547607316488
chr11	44117099	44117402	+	EXT2	EXT2	H3k4me1	1vs<1	TSSS	0	-Inf
chr11	1874200	1874427	+	LSP1	LSP1	H3k4me2	1vs<1	TSSS	0.00112030951548952	-9.56026430575651
chr11	44117099	44117402	+	EXT2	EXT2	H3k4me2	1vs<1	TSSS	0.0140105195881946	-5.04476181460473
chr11	101983171	101983476	+	YAP1	YAP1	H3k4me2	1vs<1	TSSS	0.00600977911459314	6.64934322087895
chr11	1874200	1874427	+	LSP1	LSP1	H3k4me3	1vs<1	TSSS	0.000292409775625306	-11.5533223887095
chr11	31839357	31839509	-	PAX6	PAX6	H3k4me3	1vs<1	TSSS	0.00111068622016515	-8.12028104233526
chr11	45868957	45869256	+	CRY2	CRY2	H3k4me3	1vs<1	TSSS	0.0131386741810714	-5.08962830020627
chr11	101983171	101983476	+	YAP1	YAP1	H3k4me3	1vs<1	TSSS	0.00858609550641998	6.01360072437257
chr11	118478306	118478414	+	PHLDB1	PHLDB1	H3k4me3	1vs<1	TSSS	0.0136701299678014	4.96602849421518
chr11	1874200	1874427	+	LSP1	LSP1	H3k9ac	1vs<1	TSSS	0.00850828769604203	-6.68840998076792
chr11	67141518	67141648	-	CLCF1	CLCF1	H3k9ac	1vs<1	TSSS	0.0484154848149692	4.06179646028025
chr11	101983171	101983476	+	YAP1	YAP1	H3k9ac	1vs<1	TSSS	0.0231971202794807	5.15147741012376
chr11	1874200	1874427	+	LSP1	LSP1	H3k27ac	1vs<1	TSSS	0.0101816549383955	-6.16541162928802
chr11	67141518	67141648	-	CLCF1	CLCF1	H3k27ac	1vs<1	TSSS	0.036847961845508	4.33733969815581
chr11	1874200	1874427	+	LSP1	LSP1	H3k79me2	1vs<1	TSSS	0.028397126348966	-5.61898560163457
chr11	101983171	101983476	+	YAP1	YAP1	H3k79me2	1vs<1	TSSS	0.0150118092492726	6.34351207750361
chr11	31839357	31839509	-	PAX6	PAX6	H2az	1vs<1	TSSS	0	-Inf
chr11	66725793	66725847	-	PC	PC	H2az	1vs<1	TSSS	0.0208721057643907	4.86675685778342
chr11	112046208	112046412	+	BCO2	BCO2	H2az	1vs<1	TSSS	0.0180927997026026	5.09252230714462
chr12	319371	319734	-	SLC6A12	SLC6A12	H3k4me1	0vs>0	SPLICING	0.000179394036417667	-14.8317912308621
chr12	10279170	10279307	-	CLEC7A	CLEC7A	H3k4me1	0vs>0	SPLICING	0	-Inf
chr12	52446280	52446429	+	NR4A1	NR4A1	H3k4me1	0vs>0	SPLICING	0.00479414264552883	-6.43752343446773
chr12	319371	319734	-	SLC6A12	SLC6A12	H3k4me2	0vs>0	SPLICING	0	-Inf
chr12	10279170	10279307	-	CLEC7A	CLEC7A	H3k4me2	0vs>0	SPLICING	0	-Inf
chr12	319371	319734	-	SLC6A12	SLC6A12	H3k4me3	0vs>0	SPLICING	0	-Inf
chr12	10279170	10279307	-	CLEC7A	CLEC7A	H3k4me3	0vs>0	SPLICING	0	-Inf
chr12	46863936	46864045	+	XLOC_006011	XLOC_006011	H3k4me3	1vs<1	SPLICING	0	-Inf
chr12	319371	319734	-	SLC6A12	SLC6A12	H3k9ac	0vs>0	SPLICING	0	-Inf
chr12	42631401	42631526	-	YAF2	YAF2	H3k9ac	1vs<1	SPLICING	0.000102013712375418	10.6233480062639
chr12	98989211	98989335	+	SLC25A3	SLC25A3	H3k9me1	0vs>0	SPLICING	0	-Inf
chr12	48096471	48096629	-	RPAP3	RPAP3	H3k9me1	1vs<1	SPLICING	0	-Inf
chr12	319371	319734	-	SLC6A12	SLC6A12	H4k20me1	0vs>0	SPLICING	0	-Inf
chr12	110760797	110760877	+	ATP2A2	ATP2A2	H4k20me1	1vs<1	SPLICING	0	-Inf
chr12	319371	319734	-	SLC6A12	SLC6A12	H3k27ac	0vs>0	SPLICING	0.000600189382546485	-10.6367801415624
chr12	42631401	42631526	-	YAF2	YAF2	H3k27ac	1vs<1	SPLICING	3.22939494886707e-05	12.8703375668041
chr12	42631401	42631526	-	YAF2	YAF2	H3k27me3	1vs<1	SPLICING	0	-Inf
chr12	114204880	114205013	-	XLOC_007128	XLOC_007128	H3k27me3	1vs<1	SPLICING	0	-Inf
chr12	2974521	2974565	-	FOXM1	FOXM1	H3k36me3	0vs>0	SPLICING	0	-Inf
chr12	10279170	10279307	-	CLEC7A	CLEC7A	H3k36me3	0vs>0	SPLICING	0	-Inf
chr12	99074055	99074180	+	APAF1	APAF1	H3k36me3	1vs<1	SPLICING	0.016313214700438	-6.00555734943396
chr12	110760797	110760877	+	ATP2A2	ATP2A2	H3k36me3	1vs<1	SPLICING	0	-Inf
chr12	10279170	10279307	-	CLEC7A	CLEC7A	H3k79me2	0vs>0	SPLICING	0	-Inf
chr12	110760797	110760877	+	ATP2A2	ATP2A2	H3k79me2	1vs<1	SPLICING	0.0252488411300558	-5.10000539122625
chr12	39727014	39727082	-	KIF21A	KIF21A	H2az	1vs<1	SPLICING	0	-Inf
chr12	42631401	42631526	-	YAF2	YAF2	H2az	1vs<1	SPLICING	0.0201675077509081	4.78526017348593
chr12	46863936	46864045	+	XLOC_006011	XLOC_006011	H2az	1vs<1	SPLICING	7.76221291596759e-06	-15.3698170904905
chr12	42983267	42983572	-	PRICKLE1	PRICKLE1	H3k4me1	1vs<1	TSSS	0	-Inf
chr12	15475487	15475735	+	PTPRO	PTPRO	H3k4me2	1vs<1	TSSS	0.0331908498423508	4.43597857548359
chr12	42983267	42983572	-	PRICKLE1	PRICKLE1	H3k4me2	1vs<1	TSSS	0.000107037135156641	-12.2814970652272
chr12	53440810	53440847	+	TENC1	TENC1	H3k4me2	1vs<1	TSSS	0.0291017011820055	-4.32525789037889
chr12	54673792	54673915	-	CBX5	CBX5	H3k4me2	1vs<1	TSSS	0.0365819078301737	5.50506309526224
chr12	120703420	120703563	-	PXN	PXN	H3k4me2	1vs<1	TSSS	0.00105007340835463	-8.65001165301187
chr12	3068478	3068647	+	TEAD4	TEAD4	H3k4me3	1vs<1	TSSS	0.0141697524469123	5.19948132800524
chr12	15475487	15475735	+	PTPRO	PTPRO	H3k4me3	1vs<1	TSSS	0.0325524944098372	4.24433817040403
chr12	26111964	26112081	+	RASSF8	RASSF8	H3k4me3	1vs<1	TSSS	0.00459898694856664	6.30350826338309
chr12	49961831	49961911	-	MCRS1	MCRS1	H3k4me3	1vs<1	TSSS	0.018094266508281	-4.60350838923753
chr12	51985020	51985143	+	SCN8A	SCN8A	H3k4me3	1vs<1	TSSS	0.0131386741810714	5.0783799784648
chr12	55378369	55378456	-	KIAA0748	KIAA0748	H3k4me3	1vs<1	TSSS	0.0335034728656927	-5.95099326952273
chr12	108732804	108733094	-	CMKLR1	CMKLR1	H3k4me3	1vs<1	TSSS	0.00242867867876141	-7.94476010969064
chr12	120703420	120703563	-	PXN	PXN	H3k4me3	1vs<1	TSSS	0.0360958730152942	-3.92771937652604
chr12	108732804	108733094	-	CMKLR1	CMKLR1	H3k9ac	1vs<1	TSSS	0.00685701823313874	-7.11404640337626
chr12	120315053	120315092	-	CIT	CIT	H3k9ac	1vs<1	TSSS	0.0271186763016632	4.62602767645208
chr12	120703420	120703563	-	PXN	PXN	H3k9ac	1vs<1	TSSS	0.00147533050455914	-8.62740480548286
chr12	53613734	53614150	-	RARG	RARG	H3k27ac	1vs<1	TSSS	0.0279807503516503	4.60477963135649
chr12	108732804	108733094	-	CMKLR1	CMKLR1	H3k27ac	1vs<1	TSSS	0.000179100097780476	-13.6800635185963
chr12	120315053	120315092	-	CIT	CIT	H3k27ac	1vs<1	TSSS	0.00502450917681838	6.81934468615303
chr12	127256625	127256808	-	LOC387895	LOC387895	H3k27ac	1vs<1	TSSS	0.0428178082202574	-17.80180133335
chr12	42983267	42983572	-	PRICKLE1	PRICKLE1	H3k27me3	1vs<1	TSSS	1.06421071190544e-05	-15.411285664844
chr12	120703420	120703563	-	PXN	PXN	H3k79me2	1vs<1	TSSS	0.00947004074692536	-6.4416638567833
chr12	41831541	41831815	+	PDZRN4	PDZRN4	H2az	1vs<1	TSSS	0	-Inf
chr12	50677203	50677353	-	LIMA1	LIMA1	H2az	1vs<1	TSSS	0.00582307373498805	6.37523157956112
chr12	53613734	53614150	-	RARG	RARG	H2az	1vs<1	TSSS	0.00788331414352113	5.9725379742524
chr12	108732804	108733094	-	CMKLR1	CMKLR1	H2az	1vs<1	TSSS	0.0388554099257348	-4.3358010363182
chr12	120315053	120315092	-	CIT	CIT	H2az	1vs<1	TSSS	0.0196606621612887	4.94343695410876
chr13	76381616	76382335	+	LMO7	LMO7	H3k9me1	0vs>0	SPLICING	0	-Inf
chr13	39608268	39608333	-	C13orf23	C13orf23	H3k9me1	1vs<1	SPLICING	0	-Inf
chr13	41031651	41032805	-	LOC646982	LOC646982	H3k27me3	0vs>0	SPLICING	0.000878102962411127	-8.74512735178589
chr13	39608268	39608333	-	C13orf23	C13orf23	H3k36me3	1vs<1	SPLICING	0	-Inf
chr13	103459496	103460095	+	BIVM	BIVM	H3k79me2	1vs<1	SPLICING	0.0210999436123258	-5.73173510971011
chr13	37005967	37006303	+	CCNA1	CCNA1	H3k4me1	1vs<1	TSSS	0.00563323231382085	-7.15638531342595
chr13	76194570	76196004	+	LMO7	LMO7	H3k4me1	1vs<1	TSSS	0.000328014165573588	-9.24071181745633
chr13	36705251	36705514	-	DCLK1	DCLK1	H3k4me2	1vs<1	TSSS	0.0444257215248685	4.87798985937965
chr13	76194570	76196004	+	LMO7	LMO7	H3k4me2	1vs<1	TSSS	0.00641638989782179	-6.000990673557
chr13	113622757	113623028	+	MCF2L	MCF2L	H3k4me2	1vs<1	TSSS	0.0194345530495291	-4.96442617225491
chr13	114566806	114567046	-	GAS6	GAS6	H3k4me2	1vs<1	TSSS	0.0279382129542568	4.37270924310685
chr13	36705251	36705514	-	DCLK1	DCLK1	H3k4me3	1vs<1	TSSS	0.00607148271152077	8.68803750001616
chr13	76194570	76196004	+	LMO7	LMO7	H3k4me3	1vs<1	TSSS	0	-Inf
chr13	101240995	101241046	-	A2LD1	A2LD1	H3k4me3	1vs<1	TSSS	0.0195619166468583	-4.50430809542414
chr13	37005967	37006303	+	CCNA1	CCNA1	H3k9ac	1vs<1	TSSS	0.0459553639078033	-4.69670606464476
chr13	50018122	50018221	-	CAB39L	CAB39L	H3k27ac	1vs<1	TSSS	0.00929956770385091	5.87945165202047
chr13	99738477	99738660	-	DOCK9	DOCK9	H2az	1vs<1	TSSS	0.0177362878689295	5.12274480507456
chr13	101240995	101241046	-	A2LD1	A2LD1	H2az	1vs<1	TSSS	0.0234565424316348	-4.72059369020995
chr14	50141068	50141145	-	POLE2	POLE2	H3k36me3	1vs<1	SPLICING	0	-Inf
chr14	54868242	54868297	+	CDKN3	CDKN3	H3k79me2	1vs<1	SPLICING	0	-Inf
chr14	23450470	23451848	-	JUB	JUB	H3k4me1	1vs<1	TSSS	0.00736012754787456	-5.57574076412691
chr14	69658194	69658308	+	EXD2	EXD2	H3k4me2	1vs<1	TSSS	0.00734064493297233	-5.8305767668414
chr14	23651973	23652849	-	SLC7A8	SLC7A8	H3k4me3	1vs<1	TSSS	0.0436834764198319	3.76128564012647
chr14	69658194	69658308	+	EXD2	EXD2	H3k4me3	1vs<1	TSSS	0.0107324172545689	-5.29189260684361
chr14	102829182	102829253	-	CINP	CINP	H3k9ac	1vs<1	TSSS	0.00630120295791399	-6.64328996757339
chr14	23450470	23451848	-	JUB	JUB	H3k27ac	1vs<1	TSSS	0.0399459881413336	4.25412129368901
chr14	64108522	64108591	-	WDR89	WDR89	H3k27ac	1vs<1	TSSS	0.00610905028603724	-6.50707653600055
chr14	94759526	94759596	-	SERPINA10	SERPINA10	H3k27ac	1vs<1	TSSS	0	-Inf
chr14	102829182	102829253	-	CINP	CINP	H3k27ac	1vs<1	TSSS	0.0338159744170938	-4.43205190172437
chr14	23450470	23451848	-	JUB	JUB	H3k27me3	1vs<1	TSSS	0.00227376146998769	-7.05356246640839
chr14	23651973	23652849	-	SLC7A8	SLC7A8	H3k27me3	1vs<1	TSSS	0.0190527413996159	-4.92559014933865
chr15	41667910	41668026	+	NUSAP1	NUSAP1	H3k4me1	1vs<1	SPLICING	0	-Inf
chr15	60682412	60682516	-	ANXA2	ANXA2	H3k4me2	0vs>0	SPLICING	0.0389613023465818	-4.19765538334983
chr15	60689457	60689537	-	ANXA2	ANXA2	H3k4me2	0vs>0	SPLICING	0.0125977490504453	5.03504262948135
chr15	60689457	60689537	-	ANXA2	ANXA2	H3k4me3	0vs>0	SPLICING	0.00026748345648763	9.72355099223953
chr15	100243567	100243590	+	MEF2A	MEF2A	H3k9ac	0vs>0	SPLICING	0	-Inf
chr15	40998375	40998492	+	RAD51	RAD51	H3k9ac	1vs<1	SPLICING	0	-Inf
chr15	73567033	73567065	+	NEO1	NEO1	H3k9ac	1vs<1	SPLICING	0	-Inf
chr15	44867100	44867239	-	SPG11	SPG11	H3k9me1	1vs<1	SPLICING	0	-Inf
chr15	60689457	60689537	-	ANXA2	ANXA2	H3k27ac	0vs>0	SPLICING	0.0032000937081488	6.30910630153532
chr15	100243567	100243590	+	MEF2A	MEF2A	H3k27ac	0vs>0	SPLICING	0.0378280694253877	-4.11527480312234
chr15	41667910	41668026	+	NUSAP1	NUSAP1	H3k27ac	1vs<1	SPLICING	0	-Inf
chr15	30011981	30012220	-	TJP1	TJP1	H3k36me3	0vs>0	SPLICING	0.0287676639079404	4.92114813363945
chr15	40998375	40998492	+	RAD51	RAD51	H3k36me3	1vs<1	SPLICING	0	-Inf
chr15	44865745	44865943	-	SPG11	SPG11	H3k36me3	1vs<1	SPLICING	0.034942730200732	5.25989608162758
chr15	41667910	41668026	+	NUSAP1	NUSAP1	H2az	1vs<1	SPLICING	0	-Inf
chr15	61521252	61521502	-	RORA	RORA	H3k4me2	1vs<1	TSSS	0.0247535432036641	4.47224057237503
chr15	66585920	66586073	+	DIS3L	DIS3L	H3k4me2	1vs<1	TSSS	0.0204899978883416	4.65776825521947
chr15	55581914	55582001	-	RAB27A	RAB27A	H3k4me3	1vs<1	TSSS	0.00242867867876141	-7.1632673127451
chr15	61521252	61521502	-	RORA	RORA	H3k4me3	1vs<1	TSSS	0.0136701299678014	4.96137316398024
chr15	66585920	66586073	+	DIS3L	DIS3L	H3k4me3	1vs<1	TSSS	0.0138480938047017	4.93932160559046
chr15	93632148	93632443	-	RGMA	RGMA	H3k4me3	1vs<1	TSSS	0.0122217773041461	5.16061075952022
chr15	55581914	55582001	-	RAB27A	RAB27A	H3k9ac	1vs<1	TSSS	0.023200197544498	4.80439557408403
chr15	79297059	79298002	-	RASGRF1	RASGRF1	H3k9me1	1vs<1	TSSS	0	-Inf
chr15	55581914	55582001	-	RAB27A	RAB27A	H3k27ac	1vs<1	TSSS	0.0197515375433972	4.97787211997296
chr15	52043468	52043650	-	LYSMD2	LYSMD2	H2az	1vs<1	TSSS	0.00169981714594466	8.78326641564631
chr15	55581914	55582001	-	RAB27A	RAB27A	H2az	1vs<1	TSSS	0.00531469465731779	-6.51859165156425
chr16	75286133	75286296	-	BCAR1	BCAR1	H3k4me1	0vs>0	SPLICING	0.0245762648951595	4.81815981412461
chr16	75298249	75298499	-	BCAR1	BCAR1	H3k4me1	0vs>0	SPLICING	0.00483523266366257	6.36476090041782
chr16	46919379	46919489	+	GPT2	GPT2	H3k4me2	0vs>0	SPLICING	0.0389613023465818	-4.19451793380536
chr16	75298249	75298499	-	BCAR1	BCAR1	H3k4me2	0vs>0	SPLICING	0.00507455404801907	5.9419731422852
chr16	75298249	75298499	-	BCAR1	BCAR1	H3k9ac	0vs>0	SPLICING	0.0159466978207197	4.6194832643976
chr16	75286133	75286296	-	BCAR1	BCAR1	H3k9me3	0vs>0	SPLICING	0	-Inf
chr16	75298249	75298499	-	BCAR1	BCAR1	H3k9me3	0vs>0	SPLICING	0	-Inf
chr16	55883536	55883685	-	CES5A	CES5A	H3k27me3	0vs>0	SPLICING	0	-Inf
chr16	75286133	75286296	-	BCAR1	BCAR1	H3k27me3	0vs>0	SPLICING	0	-Inf
chr16	75298249	75298499	-	BCAR1	BCAR1	H3k27me3	0vs>0	SPLICING	0	-Inf
chr16	74506424	74506532	-	GLG1	GLG1	H3k36me3	0vs>0	SPLICING	0	-Inf
chr16	75298249	75298499	-	BCAR1	BCAR1	H3k79me2	0vs>0	SPLICING	0.0386040345152078	4.55484610008921
chr16	475668	476720	+	RAB11FIP3	RAB11FIP3	H3k4me1	1vs<1	TSSS	0.0414943321687334	-4.05338484609592
chr16	19422057	19422498	+	TMC5	TMC5	H3k4me1	1vs<1	TSSS	0.000522396781257635	-8.56087757180285
chr16	27413483	27413939	+	IL21R	IL21R	H3k4me1	1vs<1	TSSS	0.000852170098580636	-7.90550284534181
chr16	85646924	85647004	+	KIAA0182	KIAA0182	H3k4me1	1vs<1	TSSS	0.000818587067360916	-7.98106268006455
chr16	475668	476720	+	RAB11FIP3	RAB11FIP3	H3k4me2	1vs<1	TSSS	0.00814423006489593	-5.64828393572772
chr16	19422057	19422498	+	TMC5	TMC5	H3k4me2	1vs<1	TSSS	0.00399214026704386	-6.64539443771887
chr16	27413483	27413939	+	IL21R	IL21R	H3k4me2	1vs<1	TSSS	0.0122778928283525	-5.21036932470698
chr16	30346296	30346695	-	LOC440354	LOC440354	H3k4me2	1vs<1	TSSS	0.00342143261299201	6.86164060172101
chr16	66878282	66878430	+	CA7	CA7	H3k4me2	1vs<1	TSSS	0	-Inf
chr16	85646924	85647004	+	KIAA0182	KIAA0182	H3k4me2	1vs<1	TSSS	0.00107419026239841	8.57046188190811
chr16	475668	476720	+	RAB11FIP3	RAB11FIP3	H3k4me3	1vs<1	TSSS	0.0199072298527095	-4.47582212455374
chr16	19422057	19422498	+	TMC5	TMC5	H3k4me3	1vs<1	TSSS	0.00270019696835644	-7.0296985993765
chr16	27413483	27413939	+	IL21R	IL21R	H3k4me3	1vs<1	TSSS	0.0166838527988921	-4.68259791968044
chr16	30346296	30346695	-	LOC440354	LOC440354	H3k4me3	1vs<1	TSSS	0.00919625961348513	5.47338068191204
chr16	66878282	66878430	+	CA7	CA7	H3k4me3	1vs<1	TSSS	0	-Inf
chr16	69139467	69139690	+	HAS3	HAS3	H3k4me3	1vs<1	TSSS	0.0141697524469123	4.85399242961594
chr16	72127266	72127539	-	TXNL4B	TXNL4B	H3k9ac	1vs<1	TSSS	0.00685701823313874	6.49354725996193
chr16	475668	476720	+	RAB11FIP3	RAB11FIP3	H4k20me1	1vs<1	TSSS	0	-Inf
chr16	67001378	67001802	+	CES3	CES3	H3k27me3	1vs<1	TSSS	1.1703102589947e-05	-15.0976302874183
chr16	85646924	85647004	+	KIAA0182	KIAA0182	H3k27me3	1vs<1	TSSS	0	-Inf
chr16	72127266	72127539	-	TXNL4B	TXNL4B	H3k79me2	1vs<1	TSSS	0.0150118092492726	5.92156923033714
chr16	475668	476720	+	RAB11FIP3	RAB11FIP3	H2az	1vs<1	TSSS	0.0234675391680247	-4.70720782491532
chr16	19422057	19422498	+	TMC5	TMC5	H2az	1vs<1	TSSS	0.00462024632006083	-6.78578280520982
chr16	27413483	27413939	+	IL21R	IL21R	H2az	1vs<1	TSSS	0.00620391549542926	-6.28922751227313
chr16	69139467	69139690	+	HAS3	HAS3	H2az	1vs<1	TSSS	0.0345224277153315	4.26773710201531
chr16	72127266	72127539	-	TXNL4B	TXNL4B	H2az	1vs<1	TSSS	0.0487673000190974	4.08562358042649
chr16	85646924	85647004	+	KIAA0182	KIAA0182	H2az	1vs<1	TSSS	0.0112957636215311	-5.59278763301221
chr17	43343617	43343885	+	LOC100133991	LOC100133991	H3k4me1	0vs>0	SPLICING	9.39206375839416e-05	-11.57962608355
chr17	42148996	42149189	+	G6PC3	G6PC3	H3k9ac	0vs>0	SPLICING	0.0150384098725547	4.70047248110046
chr17	43343617	43343885	+	LOC100133991	LOC100133991	H3k9ac	0vs>0	SPLICING	0.000679159201104992	-7.93322998884041
chr17	19186263	19187027	+	EPN2	EPN2	H3k9me1	1vs<1	SPLICING	0	-Inf
chr17	38504568	38504716	+	RARA	RARA	H3k9me1	1vs<1	SPLICING	0	-Inf
chr17	38024802	38024867	+	ZPBP2	ZPBP2	H3k9me3	0vs>0	SPLICING	0	-Inf
chr17	27844471	27844674	+	TAOK1	TAOK1	H4k20me1	1vs<1	SPLICING	0	-Inf
chr17	27849298	27849537	+	TAOK1	TAOK1	H4k20me1	1vs<1	SPLICING	0	-Inf
chr17	42971785	42971893	-	EFTUD2	EFTUD2	H4k20me1	1vs<1	SPLICING	0	-Inf
chr17	43343617	43343885	+	LOC100133991	LOC100133991	H3k27ac	0vs>0	SPLICING	0.000463817156930223	-8.44640220039687
chr17	76212745	76212862	+	BIRC5	BIRC5	H3k27ac	0vs>0	SPLICING	0	-Inf
chr17	46677809	46677907	+	LOC404266	LOC404266	H3k27me3	1vs<1	SPLICING	0	-Inf
chr17	27844471	27844674	+	TAOK1	TAOK1	H3k36me3	1vs<1	SPLICING	0.0302560612491061	-5.17822582306944
chr17	27849298	27849537	+	TAOK1	TAOK1	H3k36me3	1vs<1	SPLICING	0.0289947219300709	-5.28856893931193
chr17	73170847	73170918	-	SUMO2	SUMO2	H3k36me3	1vs<1	SPLICING	0.00435603508671476	-7.70404164952584
chr17	73170847	73170918	-	SUMO2	SUMO2	H3k79me2	1vs<1	SPLICING	0.000780097405636647	-9.41774490349495
chr17	12487877	12488038	+	FLJ34690	FLJ34690	H2az	0vs>0	SPLICING	0	-Inf
chr17	7017934	7018128	-	ASGR2	ASGR2	H3k4me1	1vs<1	TSSS	0	-Inf
chr17	37894590	37894645	+	GRB7	GRB7	H3k4me2	1vs<1	TSSS	0.00535392266229115	-12.4701233053166
chr17	40169358	40169715	-	DNAJC7	DNAJC7	H3k4me2	1vs<1	TSSS	0.00604509395240985	-6.07254591529652
chr17	43502930	43503012	-	ARHGAP27	ARHGAP27	H3k4me2	1vs<1	TSSS	0.0469368423643178	3.84511079630483
chr17	46178630	46178883	-	CBX1	CBX1	H3k4me2	1vs<1	TSSS	0.00768512867429527	-5.71304165190126
chr17	61523606	61523722	-	CYB561	CYB561	H3k4me2	1vs<1	TSSS	0.0204899978883416	4.65294748072629
chr17	80186889	80186982	+	SLC16A3	SLC16A3	H3k4me2	1vs<1	TSSS	0.00596211441718695	-6.12212088802325
chr17	3796233	3796337	-	CAMKK1	CAMKK1	H3k4me3	1vs<1	TSSS	0.0278984387626835	4.24483874850097
chr17	37894590	37894645	+	GRB7	GRB7	H3k4me3	1vs<1	TSSS	0.00733786546172302	-10.6371575329953
chr17	40169358	40169715	-	DNAJC7	DNAJC7	H3k4me3	1vs<1	TSSS	0.00963791358682249	-5.41508374905473
chr17	46178630	46178883	-	CBX1	CBX1	H3k4me3	1vs<1	TSSS	0.00662129496255494	-5.8769295646556
chr17	46894332	46894469	-	TTLL6	TTLL6	H3k4me3	1vs<1	TSSS	0.00677072294879053	-10.9844809321909
chr17	76124693	76124861	-	TMC6	TMC6	H3k4me3	1vs<1	TSSS	0.000362608177582152	9.71323815135434
chr17	40169358	40169715	-	DNAJC7	DNAJC7	H3k9ac	1vs<1	TSSS	0.00720456187328818	-6.36392983029055
chr17	47287806	47287936	-	GNGT2	GNGT2	H3k9ac	1vs<1	TSSS	0.0185756375913874	-6.03690745934066
chr17	64188115	64188212	-	CCDC46	CCDC46	H3k9ac	1vs<1	TSSS	0.00967541721710705	-6.47179000439657
chr17	4487276	4487393	+	SMTNL2	SMTNL2	H3k9me3	1vs<1	TSSS	0	-Inf
chr17	47287806	47287936	-	GNGT2	GNGT2	H3k27ac	1vs<1	TSSS	0.00984806223918733	-6.97015481121941
chr17	15165746	15165889	-	PMP22	PMP22	H3k27me3	1vs<1	TSSS	0.001024059127895	-8.09573263784604
chr17	76124693	76124861	-	TMC6	TMC6	H3k27me3	1vs<1	TSSS	0	-Inf
chr17	47287806	47287936	-	GNGT2	GNGT2	H3k79me2	1vs<1	TSSS	0	-Inf
chr17	1012174	1012324	-	ABR	ABR	H2az	1vs<1	TSSS	0.0258616978388816	4.59493319549309
chr17	15165746	15165889	-	PMP22	PMP22	H2az	1vs<1	TSSS	0.0286306672467643	4.47097575137797
chr17	31618426	31620006	-	ACCN1	ACCN1	H2az	1vs<1	TSSS	0.0423479048055952	6.02997809096513
chr17	56296512	56296666	-	MKS1	MKS1	H2az	1vs<1	TSSS	0.00692270069054572	6.13739632264397
chr17	61523606	61523722	-	CYB561	CYB561	H2az	1vs<1	TSSS	0.0232136980036387	-4.74194459093508
chr18	44101060	44101245	-	LOXHD1	LOXHD1	H3k27me3	0vs>0	SPLICING	0	-Inf
chr18	24126692	24128500	-	KCTD1	KCTD1	H3k4me1	1vs<1	TSSS	0.00239771283075464	-6.77587692941829
chr18	13218786	13218987	+	C18orf1	C18orf1	H3k4me2	1vs<1	TSSS	0.00768512867429527	-5.71813458439437
chr18	42260863	42260986	+	SETBP1	SETBP1	H3k4me2	1vs<1	TSSS	0.0442109798278926	3.91467381009796
chr18	13218786	13218987	+	C18orf1	C18orf1	H3k4me3	1vs<1	TSSS	0.0141697524469123	-4.85839949212099
chr18	21718955	21719082	+	CABYR	CABYR	H3k4me3	1vs<1	TSSS	0.0288355552984793	-4.35253492532371
chr18	42260863	42260986	+	SETBP1	SETBP1	H3k4me3	1vs<1	TSSS	0.0196695651921329	4.49247972333946
chr18	11689136	11689938	+	GNAL	GNAL	H3k9ac	1vs<1	TSSS	0.00188926793481073	-8.22055219110239
chr18	21977619	21977790	-	OSBPL1A	OSBPL1A	H3k9ac	1vs<1	TSSS	0.0292818649293031	-4.81605668064318
chr18	24126692	24128500	-	KCTD1	KCTD1	H3k9me3	1vs<1	TSSS	0.0271807694104493	-5.21700190130613
chr18	31802954	31803515	-	NOL4	NOL4	H3k9me3	1vs<1	TSSS	0	-Inf
chr18	24126692	24128500	-	KCTD1	KCTD1	H4k20me1	1vs<1	TSSS	0.0223131062796624	-5.76642361687859
chr18	11689136	11689938	+	GNAL	GNAL	H3k27ac	1vs<1	TSSS	0.0029067318417294	-7.64576401436383
chr18	21718955	21719082	+	CABYR	CABYR	H3k27ac	1vs<1	TSSS	0.0443931252833312	-4.36091547704921
chr18	21977619	21977790	-	OSBPL1A	OSBPL1A	H3k27ac	1vs<1	TSSS	0.036847961845508	-4.58704297340361
chr18	24126692	24128500	-	KCTD1	KCTD1	H3k27me3	1vs<1	TSSS	0.000374950702374492	-9.42272427297029
chr19	7832402	7832514	+	CLEC4M	CLEC4M	H3k4me1	1vs<1	SPLICING	0	-Inf
chr19	58695288	58695365	+	ZNF274	ZNF274	H3k4me1	1vs<1	SPLICING	0	-Inf
chr19	49309774	49309974	-	BCAT2	BCAT2	H3k4me2	1vs<1	SPLICING	0	-Inf
chr19	49310257	49310331	-	BCAT2	BCAT2	H3k4me2	1vs<1	SPLICING	0	-Inf
chr19	44530178	44530238	+	ZNF222	ZNF222	H3k4me3	0vs>0	SPLICING	0.0277018889232647	4.38876287644967
chr19	35433498	35433577	+	ZNF30	ZNF30	H3k4me3	1vs<1	SPLICING	0	-Inf
chr19	47729821	47730011	-	BBC3	BBC3	H3k4me3	1vs<1	SPLICING	0.000279599877631878	-9.12025672413969
chr19	49309774	49309974	-	BCAT2	BCAT2	H3k4me3	1vs<1	SPLICING	0	-Inf
chr19	49310257	49310331	-	BCAT2	BCAT2	H3k4me3	1vs<1	SPLICING	0	-Inf
chr19	49494559	49494740	-	GYS1	GYS1	H3k4me3	1vs<1	SPLICING	0.000386586654494399	-8.62319406965355
chr19	58697079	58697205	+	ZNF274	ZNF274	H3k4me3	1vs<1	SPLICING	0	-Inf
chr19	7600013	7600088	+	PNPLA6	PNPLA6	H3k9ac	0vs>0	SPLICING	0.0111857616785686	5.01234208389758
chr19	47729821	47730011	-	BBC3	BBC3	H3k9ac	1vs<1	SPLICING	0.00618739734229197	-5.77590926422253
chr19	49310257	49310331	-	BCAT2	BCAT2	H3k9ac	1vs<1	SPLICING	0	-Inf
chr19	49494559	49494740	-	GYS1	GYS1	H3k9ac	1vs<1	SPLICING	0	-Inf
chr19	53626754	53626908	-	ZNF415	ZNF415	H3k9me3	0vs>0	SPLICING	0	-Inf
chr19	57986392	57986514	-	ZNF772	ZNF772	H3k9me3	0vs>0	SPLICING	0.0348029525557431	-3.82588980019169
chr19	35433498	35433577	+	ZNF30	ZNF30	H3k9me3	1vs<1	SPLICING	0.0116193874587882	-5.26944227954748
chr19	52503599	52503631	-	ZNF615	ZNF615	H3k9me3	1vs<1	SPLICING	0	-Inf
chr19	58695288	58695365	+	ZNF274	ZNF274	H3k9me3	1vs<1	SPLICING	0.00911345228304544	-5.97575247321276
chr19	58697079	58697205	+	ZNF274	ZNF274	H3k9me3	1vs<1	SPLICING	0.00924945094918812	-5.70902931292675
chr19	7600013	7600088	+	PNPLA6	PNPLA6	H3k27ac	0vs>0	SPLICING	0.0130519866104195	5.00154530462368
chr19	49309774	49309974	-	BCAT2	BCAT2	H3k27ac	1vs<1	SPLICING	0	-Inf
chr19	49310257	49310331	-	BCAT2	BCAT2	H3k27ac	1vs<1	SPLICING	6.0497417147462e-05	-11.7204180621619
chr19	5229502	5229695	-	PTPRS	PTPRS	H3k27me3	1vs<1	SPLICING	0	-Inf
chr19	7150508	7150543	-	INSR	INSR	H3k36me3	0vs>0	SPLICING	0	-Inf
chr19	11213340	11213462	+	LDLR	LDLR	H3k36me3	1vs<1	SPLICING	0.016313214700438	6.00543045462831
chr19	44531550	44531642	+	ZNF222	ZNF222	H3k36me3	1vs<1	SPLICING	0.0289947219300709	-5.26295818404
chr19	50165205	50165585	-	IRF3	IRF3	H3k36me3	1vs<1	SPLICING	0.00666862349689497	7.13482663835923
chr19	373940	374011	-	THEG	THEG	H2az	0vs1	SPLICING	0	-Inf
chr19	58695288	58695365	+	ZNF274	ZNF274	H2az	1vs<1	SPLICING	0.0278611500163883	-4.46427087774322
chr19	17448326	17448473	+	GTPBP3	GTPBP3	H3k4me1	1vs<1	TSSS	0	-Inf
chr19	45909550	45909607	-	PPP1R13L	PPP1R13L	H3k4me1	1vs<1	TSSS	0	-Inf
chr19	17448326	17448473	+	GTPBP3	GTPBP3	H3k4me2	1vs<1	TSSS	0.00166448445565625	-7.91184044319903
chr19	41107277	41107543	+	LTBP4	LTBP4	H3k4me2	1vs<1	TSSS	0.00342143261299201	6.86896763744561
chr19	41945787	41945843	-	ATP5SL	ATP5SL	H3k4me2	1vs<1	TSSS	0.00018527356724308	-11.3414855998043
chr19	45909550	45909607	-	PPP1R13L	PPP1R13L	H3k4me2	1vs<1	TSSS	0.000314935929555566	-10.4704103137635
chr19	52839498	52839759	+	ZNF610	ZNF610	H3k4me2	1vs<1	TSSS	0.00399214026704386	-7.32408451207227
chr19	7895161	7895267	+	EVI5L	EVI5L	H3k4me3	1vs<1	TSSS	0.0209052475573737	4.43152309175572
chr19	7985194	7985434	+	SNAPC2	SNAPC2	H3k4me3	1vs<1	TSSS	0.0132433752507091	-5.02898399653481
chr19	17448326	17448473	+	GTPBP3	GTPBP3	H3k4me3	1vs<1	TSSS	0.0218687627609782	-4.39039649598181
chr19	41107277	41107543	+	LTBP4	LTBP4	H3k4me3	1vs<1	TSSS	5.97723105461667e-05	13.0671901379342
chr19	41945787	41945843	-	ATP5SL	ATP5SL	H3k4me3	1vs<1	TSSS	0.00270602922957059	-6.97741266665155
chr19	45909550	45909607	-	PPP1R13L	PPP1R13L	H3k4me3	1vs<1	TSSS	1.84790622093768e-05	-15.5745659351238
chr19	51472746	51472929	-	KLK6	KLK6	H3k4me3	1vs<1	TSSS	0	-Inf
chr19	52839498	52839759	+	ZNF610	ZNF610	H3k4me3	1vs<1	TSSS	0.018099872056827	-4.88394392386938
chr19	55477711	55477835	+	NLRP2	NLRP2	H3k4me3	1vs<1	TSSS	0	-Inf
chr19	7985194	7985434	+	SNAPC2	SNAPC2	H3k9ac	1vs<1	TSSS	0.00502889985937872	-6.9072966786102
chr19	20150152	20150277	-	ZNF682	ZNF682	H3k9ac	1vs<1	TSSS	0.0209180667117516	-5.34054460771101
chr19	41945787	41945843	-	ATP5SL	ATP5SL	H3k9ac	1vs<1	TSSS	0.0185364230728446	5.12808182994899
chr19	1174171	1174282	-	SBNO2	SBNO2	H3k27ac	1vs<1	TSSS	0.0248034686536529	4.72850667527134
chr19	6424464	6424822	-	KHSRP	KHSRP	H3k27ac	1vs<1	TSSS	0.0173017043950881	-5.11793381363395
chr19	7985194	7985434	+	SNAPC2	SNAPC2	H3k27ac	1vs<1	TSSS	0.00424983869849023	-7.14934641543552
chr19	37663529	37663615	-	ZNF585A	ZNF585A	H3k27ac	1vs<1	TSSS	0.0118258565193993	-5.51479770307783
chr19	7985194	7985434	+	SNAPC2	SNAPC2	H2az	1vs<1	TSSS	0.00788331414352113	5.99505712513973
chr19	17448326	17448473	+	GTPBP3	GTPBP3	H2az	1vs<1	TSSS	0.0384393167407311	-4.12193492058018
chr19	39466226	39466380	-	FBXO17	FBXO17	H2az	1vs<1	TSSS	0.00320727179342575	12.0466315391798
chr19	45909550	45909607	-	PPP1R13L	PPP1R13L	H2az	1vs<1	TSSS	0.0272294627676025	-4.54136402733615
chr2	85921876	85922119	+	GNLY	GNLY	H3k4me1	0vs>0	SPLICING	0.0161412293641896	-7.16844139679186
chr2	20738931	20739265	-	XLOC_015873	XLOC_015873	H3k4me1	1vs<1	SPLICING	0.0400184205970608	7.36175589401386
chr2	210557349	210561074	+	MAP2	MAP2	H3k4me1	1vs<1	SPLICING	0	-Inf
chr2	210561266	210561472	+	MAP2	MAP2	H3k4me1	1vs<1	SPLICING	0	-Inf
chr2	85921876	85922119	+	GNLY	GNLY	H3k4me2	0vs>0	SPLICING	0	-Inf
chr2	179565847	179565930	-	TTN	TTN	H3k4me2	0vs>0	SPLICING	0.0325563823267164	-4.16922665180403
chr2	179578624	179578902	-	TTN	TTN	H3k4me2	0vs>0	SPLICING	0	-Inf
chr2	210557349	210561074	+	MAP2	MAP2	H3k4me2	1vs<1	SPLICING	0	-Inf
chr2	210561266	210561472	+	MAP2	MAP2	H3k4me2	1vs<1	SPLICING	0	-Inf
chr2	210561641	210561775	+	MAP2	MAP2	H3k4me2	1vs<1	SPLICING	0	-Inf
chr2	85921876	85922119	+	GNLY	GNLY	H3k4me3	0vs>0	SPLICING	0	-Inf
chr2	210561266	210561472	+	MAP2	MAP2	H3k4me3	1vs<1	SPLICING	0	-Inf
chr2	85921876	85922119	+	GNLY	GNLY	H3k9ac	0vs>0	SPLICING	0	-Inf
chr2	179515970	179516047	-	TTN	TTN	H3k9ac	0vs>0	SPLICING	0	-Inf
chr2	179563570	179563641	-	TTN	TTN	H3k9ac	0vs>0	SPLICING	0	-Inf
chr2	179596032	179596310	-	TTN	TTN	H3k9ac	0vs>0	SPLICING	0	-Inf
chr2	1491593	1491763	+	TPO	TPO	H3k9ac	1vs<1	SPLICING	0	-Inf
chr2	44428325	44429184	+	PPM1B	PPM1B	H3k9me1	1vs<1	SPLICING	0	-Inf
chr2	179596032	179596310	-	TTN	TTN	H3k9me3	0vs>0	SPLICING	0	-Inf
chr2	179596420	179596698	-	TTN	TTN	H3k9me3	0vs>0	SPLICING	0	-Inf
chr2	179596793	179597074	-	TTN	TTN	H3k9me3	0vs>0	SPLICING	0	-Inf
chr2	179599434	179599715	-	TTN	TTN	H3k9me3	0vs>0	SPLICING	0	-Inf
chr2	182218935	182219070	+	XLOC_015475	XLOC_015475	H4k20me1	1vs<1	SPLICING	0	-Inf
chr2	85921876	85922119	+	GNLY	GNLY	H3k27ac	0vs>0	SPLICING	0	-Inf
chr2	106013104	106013154	-	FHL2	FHL2	H3k27ac	1vs<1	SPLICING	0.0159485941954848	-5.63219000715675
chr2	210561266	210561472	+	MAP2	MAP2	H3k27ac	1vs<1	SPLICING	0	-Inf
chr2	179586574	179586861	-	TTN	TTN	H3k27me3	0vs>0	SPLICING	0.029950334447401	-4.38356866432373
chr2	179587773	179588051	-	TTN	TTN	H3k27me3	0vs>0	SPLICING	0.00726594712273796	-5.62394885568798
chr2	179590095	179590376	-	TTN	TTN	H3k27me3	0vs>0	SPLICING	0	-Inf
chr2	86509293	86509365	-	REEP1	REEP1	H3k27me3	1vs<1	SPLICING	0	-Inf
chr2	171633657	171633687	+	XLOC_015424	XLOC_015424	H3k27me3	1vs<1	SPLICING	0	-Inf
chr2	135743370	135745823	-	YSK4	YSK4	H2az	0vs1	SPLICING	0	-Inf
chr2	179546103	179546177	-	TTN	TTN	H2az	0vs>0	SPLICING	0	-Inf
chr2	179565847	179565930	-	TTN	TTN	H2az	0vs>0	SPLICING	0	-Inf
chr2	179568874	179569134	-	TTN	TTN	H2az	0vs>0	SPLICING	0	-Inf
chr2	179569604	179569693	-	TTN	TTN	H2az	0vs>0	SPLICING	0	-Inf
chr2	179574293	179574583	-	TTN	TTN	H2az	0vs>0	SPLICING	0	-Inf
chr2	179591817	179592098	-	TTN	TTN	H2az	0vs>0	SPLICING	0	-Inf
chr2	179597167	179597445	-	TTN	TTN	H2az	0vs>0	SPLICING	0	-Inf
chr2	182218935	182219070	+	XLOC_015475	XLOC_015475	H2az	1vs<1	SPLICING	0	-Inf
chr2	65659096	65659656	-	SPRED2	SPRED2	H3k4me1	1vs<1	TSSS	0	-Inf
chr2	102608306	102608473	+	IL1R2	IL1R2	H3k4me1	1vs<1	TSSS	0.000699268986439051	-8.19014024988156
chr2	220407947	220408487	-	CHPF	CHPF	H3k4me1	1vs<1	TSSS	0.00240910023488945	-6.74588959763559
chr2	231565038	231565244	-	XLOC_016699	XLOC_016699	H3k4me1	1vs<1	TSSS	0.0248721580479766	-4.4565065983195
chr2	242842509	242843498	-	XLOC_016772	XLOC_016772	H3k4me1	1vs<1	TSSS	0.00736012754787456	-6.05037600977423
chr2	63275524	63275656	-	LOC100132215	LOC100132215	H3k4me2	1vs<1	TSSS	0.00105007340835463	-9.77228015572543
chr2	102608306	102608473	+	IL1R2	IL1R2	H3k4me2	1vs<1	TSSS	0.00048589320116539	-9.77300169616732
chr2	152955463	152955593	-	CACNB4	CACNB4	H3k4me2	1vs<1	TSSS	5.54237568905725e-06	18.6291811042188
chr2	233877778	233877951	-	NGEF	NGEF	H3k4me2	1vs<1	TSSS	0	-Inf
chr2	56150846	56150932	-	EFEMP1	EFEMP1	H3k4me3	1vs<1	TSSS	0.00459898694856664	-9.47610839300898
chr2	86115947	86116157	-	ST3GAL5	ST3GAL5	H3k4me3	1vs<1	TSSS	0.000228166016242439	10.4374709831767
chr2	99757891	99758037	-	TSGA10	TSGA10	H3k4me3	1vs<1	TSSS	0.00859325027486288	-5.54473086991578
chr2	102608306	102608473	+	IL1R2	IL1R2	H3k4me3	1vs<1	TSSS	0.000113450868340545	-11.7763726485083
chr2	152955463	152955593	-	CACNB4	CACNB4	H3k4me3	1vs<1	TSSS	5.42320516415188e-05	13.3324767533771
chr2	160654643	160654766	-	CD302	CD302	H3k4me3	1vs<1	TSSS	0.0489785903938892	-3.64832229322823
chr2	178936253	178937482	-	PDE11A	PDE11A	H3k4me3	1vs<1	TSSS	0.00677072294879053	-6.32722426213592
chr2	179059374	179059401	+	OSBPL6	OSBPL6	H3k4me3	1vs<1	TSSS	0.00459898694856664	6.29236379492255
chr2	220173940	220174295	-	PTPRN	PTPRN	H3k4me3	1vs<1	TSSS	0.0141697524469123	-4.87658095328826
chr2	233877778	233877951	-	NGEF	NGEF	H3k4me3	1vs<1	TSSS	0	-Inf
chr2	55459359	55459449	-	C2orf63	C2orf63	H3k9ac	1vs<1	TSSS	0.00990701859335548	-5.86493913973643
chr2	88990273	88991016	-	XLOC_016194	XLOC_016194	H3k9ac	1vs<1	TSSS	0.0114088879669413	-5.62232857251838
chr2	99757891	99758037	-	TSGA10	TSGA10	H3k9ac	1vs<1	TSSS	0.010752121479898	5.76752033579593
chr2	200322062	200322819	-	SATB2	SATB2	H3k9ac	1vs<1	TSSS	0.0234856498113406	-4.76599674632305
chr2	233877778	233877951	-	NGEF	NGEF	H3k9ac	1vs<1	TSSS	0	-Inf
chr2	55459359	55459449	-	C2orf63	C2orf63	H3k27ac	1vs<1	TSSS	0.0447900370279172	-4.07213430459463
chr2	65659096	65659656	-	SPRED2	SPRED2	H3k27ac	1vs<1	TSSS	0.00848336916931558	6.06536300098212
chr2	88990273	88991016	-	XLOC_016194	XLOC_016194	H3k27ac	1vs<1	TSSS	0.00929956770385091	-5.8779027237654
chr2	102608306	102608473	+	IL1R2	IL1R2	H3k27ac	1vs<1	TSSS	0	-Inf
chr2	220407947	220408487	-	CHPF	CHPF	H3k27ac	1vs<1	TSSS	0.0144610965799666	5.28411601739632
chr2	231084589	231084827	-	SP110	SP110	H3k27ac	1vs<1	TSSS	0.0447900370279172	-4.88646682579645
chr2	233877778	233877951	-	NGEF	NGEF	H3k27ac	1vs<1	TSSS	0	-Inf
chr2	65659096	65659656	-	SPRED2	SPRED2	H3k27me3	1vs<1	TSSS	0	-Inf
chr2	88990273	88991016	-	XLOC_016194	XLOC_016194	H3k27me3	1vs<1	TSSS	0	-Inf
chr2	96012768	96012870	+	KCNIP3	KCNIP3	H3k27me3	1vs<1	TSSS	0	-Inf
chr2	220407947	220408487	-	CHPF	CHPF	H3k27me3	1vs<1	TSSS	0.0200130667537705	-4.86159419232919
chr2	55459359	55459449	-	C2orf63	C2orf63	H3k79me2	1vs<1	TSSS	0.000727579844992224	-9.37962840699324
chr2	33701321	33701774	+	RASGRP3	RASGRP3	H2az	1vs<1	TSSS	0.0345224277153315	4.38618815010647
chr2	55459359	55459449	-	C2orf63	C2orf63	H2az	1vs<1	TSSS	0.0330983686659435	-4.3404181005001
chr2	65659096	65659656	-	SPRED2	SPRED2	H2az	1vs<1	TSSS	0.0487673000190974	-3.91407258183737
chr2	160654643	160654766	-	CD302	CD302	H2az	1vs<1	TSSS	0.0124954208266924	5.48679545845486
chr2	175547502	175547627	-	WIPF1	WIPF1	H2az	1vs<1	TSSS	0.0345224277153315	-4.49987775647472
chr2	220173940	220174295	-	PTPRN	PTPRN	H2az	1vs<1	TSSS	0	-Inf
chr2	233877778	233877951	-	NGEF	NGEF	H2az	1vs<1	TSSS	0	-Inf
chr2	242750160	242750369	+	NEU4	NEU4	H2az	1vs<1	TSSS	0	-Inf
chr2	242842509	242843498	-	XLOC_016772	XLOC_016772	H2az	1vs<1	TSSS	0.0195416138000255	-5.35389425794168
chr20	32298361	32298559	-	PXMP4	PXMP4	H3k4me1	0vs>0	SPLICING	0.00123783363937571	-7.89134320028456
chr20	33902491	33902568	-	UQCC	UQCC	H3k4me1	1vs<1	SPLICING	0	-Inf
chr20	32298361	32298559	-	PXMP4	PXMP4	H3k4me2	0vs>0	SPLICING	0	-Inf
chr20	34802279	34802362	+	EPB41L1	EPB41L1	H3k9ac	1vs<1	SPLICING	0	-Inf
chr20	46995479	46995802	+	LOC284749	LOC284749	H3k9me3	1vs<1	SPLICING	0	-Inf
chr20	31394015	31394133	+	DNMT3B	DNMT3B	H3k27ac	0vs>0	SPLICING	0	-Inf
chr20	33902491	33902568	-	UQCC	UQCC	H3k27ac	1vs<1	SPLICING	0	-Inf
chr20	31394015	31394133	+	DNMT3B	DNMT3B	H2az	0vs>0	SPLICING	8.65399553800653e-05	-9.95286658431372
chr20	34761686	34761876	+	EPB41L1	EPB41L1	H2az	1vs<1	SPLICING	0	-Inf
chr20	34742662	34742818	+	EPB41L1	EPB41L1	H3k4me1	1vs<1	TSSS	0.0333881422531998	-4.22429168231858
chr20	30458120	30458479	-	DUSP15	DUSP15	H3k4me3	1vs<1	TSSS	0.026048041668871	5.20492445627334
chr20	33146519	33146712	+	MAP1LC3A	MAP1LC3A	H3k4me3	1vs<1	TSSS	0.0489785903938892	-3.75293633924156
chr20	34742662	34742818	+	EPB41L1	EPB41L1	H3k4me3	1vs<1	TSSS	0.0171183830182853	4.65435305032088
chr20	34742662	34742818	+	EPB41L1	EPB41L1	H3k27me3	1vs<1	TSSS	0	-Inf
chr21	44883220	44883369	-	C21orf125	C21orf125	H3k4me1	0vs>0	SPLICING	0	-Inf
chr21	37849672	37849861	-	CLDN14	CLDN14	H3k4me2	0vs>0	SPLICING	0	-Inf
chr21	37849672	37849861	-	CLDN14	CLDN14	H3k4me3	0vs>0	SPLICING	0	-Inf
chr21	37849672	37849861	-	CLDN14	CLDN14	H3k9ac	0vs>0	SPLICING	0	-Inf
chr21	39817327	39817544	-	ERG	ERG	H3k9me1	1vs<1	SPLICING	0	-Inf
chr21	44883220	44883369	-	C21orf125	C21orf125	H3k27ac	0vs>0	SPLICING	0	-Inf
chr21	44496335	44496472	-	CBS	CBS	H3k4me1	1vs<1	TSSS	0	-Inf
chr21	43816051	43816200	-	TMPRSS3	TMPRSS3	H3k4me2	1vs<1	TSSS	0.0134860013604221	-6.0460603628853
chr21	45705763	45706021	+	AIRE	AIRE	H3k4me2	1vs<1	TSSS	0.0108788991891422	-6.37851742657795
chr21	44496335	44496472	-	CBS	CBS	H3k4me3	1vs<1	TSSS	0.0132433752507091	5.02633395617823
chr21	42792520	42792744	+	MX1	MX1	H3k27ac	1vs<1	TSSS	0.00930614415542194	5.84076435019666
chr21	44496335	44496472	-	CBS	CBS	H3k27me3	1vs<1	TSSS	0.00142833057747955	-7.62670008407947
chr21	43816051	43816200	-	TMPRSS3	TMPRSS3	H2az	1vs<1	TSSS	0.00169981714594466	-11.6573741921977
chr21	45705763	45706021	+	AIRE	AIRE	H2az	1vs<1	TSSS	0.00557680104890726	-8.02766171715929
chr22	30035079	30035201	+	NF2	NF2	H3k36me3	1vs<1	SPLICING	0.000216202911331775	-11.7694538812395
chr22	46085592	46085783	+	ATXN10	ATXN10	H3k79me2	1vs<1	SPLICING	0.00104449934257288	8.864632391978
chr22	36236239	36236630	-	RBFOX2	RBFOX2	H3k4me1	1vs<1	TSSS	0.00784875676540027	-5.92580373782194
chr22	50523784	50524358	-	MLC1	MLC1	H3k4me2	1vs<1	TSSS	0.0178754175199486	6.42241384445804
chr22	31885680	31885874	-	EIF4ENIF1	EIF4ENIF1	H3k4me3	1vs<1	TSSS	0.0243837828666599	4.29504205484865
chr22	38668890	38669040	-	TMEM184B	TMEM184B	H3k4me3	1vs<1	TSSS	6.33816976992302e-05	12.8766626195181
chr22	36236239	36236630	-	RBFOX2	RBFOX2	H3k27me3	1vs<1	TSSS	0	-Inf
chr22	43411027	43411184	-	PACSIN2	PACSIN2	H2az	1vs<1	TSSS	0.0196606621612887	-4.94575424568765
chr22	50523784	50524358	-	MLC1	MLC1	H2az	1vs<1	TSSS	0.0337733577941687	5.55410528007532
chr3	58468983	58469079	+	XLOC_018963	XLOC_018963	H3k4me1	0vs>0	SPLICING	0	-Inf
chr3	4490950	4491024	-	SUMF1	SUMF1	H3k4me1	1vs<1	SPLICING	0	-Inf
chr3	58468983	58469079	+	XLOC_018963	XLOC_018963	H3k4me2	0vs>0	SPLICING	0	-Inf
chr3	197281433	197281584	-	BDH1	BDH1	H3k4me2	0vs>0	SPLICING	0.00449907985549205	6.10481023452432
chr3	197281433	197281584	-	BDH1	BDH1	H3k4me3	0vs>0	SPLICING	0.023542034874836	4.62019866417251
chr3	58468983	58469079	+	XLOC_018963	XLOC_018963	H3k9ac	0vs>0	SPLICING	0	-Inf
chr3	197281433	197281584	-	BDH1	BDH1	H3k9ac	0vs>0	SPLICING	0.0159862691984617	4.58357852913291
chr3	44756083	44756180	+	ZNF502	ZNF502	H3k9me3	1vs<1	SPLICING	0	-Inf
chr3	58468983	58469079	+	XLOC_018963	XLOC_018963	H3k27ac	0vs>0	SPLICING	0	-Inf
chr3	140953058	140953160	+	ACPL2	ACPL2	H3k27me3	0vs>0	SPLICING	0	-Inf
chr3	9874788	9874929	+	ARPC4	ARPC4	H3k36me3	0vs>0	SPLICING	0.00753882762959154	-6.13279422636551
chr3	129179697	129179849	+	IFT122	IFT122	H3k36me3	0vs>0	SPLICING	0	-Inf
chr3	58468983	58469079	+	XLOC_018963	XLOC_018963	H3k79me2	0vs>0	SPLICING	0	-Inf
chr3	152150506	152150709	+	MBNL1	MBNL1	H3k79me2	1vs<1	SPLICING	0.040747884868063	4.66351248413129
chr3	197281433	197281584	-	BDH1	BDH1	H2az	0vs>0	SPLICING	0.00764477874569678	5.12701475292098
chr3	127251642	127251756	-	XLOC_019968	XLOC_019968	H2az	1vs<1	SPLICING	0	-Inf
chr3	49055833	49056017	-	DALRD3	DALRD3	H3k4me1	1vs<1	TSSS	0.000119385522769804	-10.9008824681292
chr3	121902530	121902659	+	CASR	CASR	H3k4me1	1vs<1	TSSS	0	-Inf
chr3	138066625	138067167	+	MRAS	MRAS	H3k4me1	1vs<1	TSSS	0.000205758078625935	-10.0310188152241
chr3	147123160	147123307	-	ZIC4	ZIC4	H3k4me1	1vs<1	TSSS	0	-Inf
chr3	186648315	186648623	+	ST6GAL1	ST6GAL1	H3k4me1	1vs<1	TSSS	0	-Inf
chr3	193924037	193924096	-	XLOC_020230	XLOC_020230	H3k4me1	1vs<1	TSSS	0	-Inf
chr3	197686716	197686886	-	IQCG	IQCG	H3k4me1	1vs<1	TSSS	4.72740185063125e-06	-16.7779422577903
chr3	46506315	46506598	-	LTF	LTF	H3k4me2	1vs<1	TSSS	0.00942160291445696	-5.95064245390617
chr3	49055833	49056017	-	DALRD3	DALRD3	H3k4me2	1vs<1	TSSS	0.00596211441718695	-6.14339947962219
chr3	79067557	79068609	-	ROBO1	ROBO1	H3k4me2	1vs<1	TSSS	4.69831467207099e-06	19.2209801625703
chr3	111717586	111717961	+	TAGLN3	TAGLN3	H3k4me2	1vs<1	TSSS	0.0025688059525838	9.32378219283689
chr3	127541927	127542051	-	MGLL	MGLL	H3k4me2	1vs<1	TSSS	0.00742470485927407	-6.30269571667985
chr3	138327542	138327779	+	FAIM	FAIM	H3k4me2	1vs<1	TSSS	0.0381656352042418	-4.05582254141333
chr3	147123160	147123307	-	ZIC4	ZIC4	H3k4me2	1vs<1	TSSS	0	-Inf
chr3	193924037	193924096	-	XLOC_020230	XLOC_020230	H3k4me2	1vs<1	TSSS	0	-Inf
chr3	197686716	197686886	-	IQCG	IQCG	H3k4me2	1vs<1	TSSS	0.000107037135156641	-12.3582640431979
chr3	46506315	46506598	-	LTF	LTF	H3k4me3	1vs<1	TSSS	0	-Inf
chr3	49055833	49056017	-	DALRD3	DALRD3	H3k4me3	1vs<1	TSSS	0.0259454346919649	-4.24221357404384
chr3	79067557	79068609	-	ROBO1	ROBO1	H3k4me3	1vs<1	TSSS	1.12766920768305e-05	16.7423316178142
chr3	111717586	111717961	+	TAGLN3	TAGLN3	H3k4me3	1vs<1	TSSS	0.00459898694856664	7.79791878988717
chr3	127541927	127542051	-	MGLL	MGLL	H3k4me3	1vs<1	TSSS	0.0141697524469123	-5.19493697943646
chr3	138066625	138067167	+	MRAS	MRAS	H3k4me3	1vs<1	TSSS	0.00040837689844717	9.50275436726183
chr3	138327542	138327779	+	FAIM	FAIM	H3k4me3	1vs<1	TSSS	0.018290832643105	-4.56310665840639
chr3	186648315	186648623	+	ST6GAL1	ST6GAL1	H3k4me3	1vs<1	TSSS	0.0136701299678014	-4.95975495332299
chr3	197686716	197686886	-	IQCG	IQCG	H3k4me3	1vs<1	TSSS	0.000181300147526734	-10.8176394850382
chr3	49055833	49056017	-	DALRD3	DALRD3	H3k9ac	1vs<1	TSSS	0.00967541721710705	-5.91235333287248
chr3	79067557	79068609	-	ROBO1	ROBO1	H3k9ac	1vs<1	TSSS	0.000613785817150697	9.93442626399512
chr3	111717586	111717961	+	TAGLN3	TAGLN3	H3k9ac	1vs<1	TSSS	0.0292818649293031	5.24433035362679
chr3	127541927	127542051	-	MGLL	MGLL	H3k9ac	1vs<1	TSSS	0.0459925477355566	-4.34107136900856
chr3	132379140	132379542	+	UBA5	UBA5	H3k9ac	1vs<1	TSSS	0.0185364230728446	5.12534786689547
chr3	138066625	138067167	+	MRAS	MRAS	H3k9ac	1vs<1	TSSS	0.000298043468736742	11.2731798090822
chr3	193924037	193924096	-	XLOC_020230	XLOC_020230	H3k9ac	1vs<1	TSSS	0	-Inf
chr3	197686716	197686886	-	IQCG	IQCG	H3k9ac	1vs<1	TSSS	0.00967541721710705	-5.9362633465864
chr3	123166259	123167392	-	ADCY5	ADCY5	H3k9me3	1vs<1	TSSS	0.0477687298925207	-4.52867962623818
chr3	79067557	79068609	-	ROBO1	ROBO1	H3k27ac	1vs<1	TSSS	0.00932063632888875	5.81388688229016
chr3	138066625	138067167	+	MRAS	MRAS	H3k27ac	1vs<1	TSSS	0.0446018877710677	4.11215221017203
chr3	142315229	142315351	+	PLS1	PLS1	H3k27ac	1vs<1	TSSS	0.0295824208913971	-4.82972794413346
chr3	183967445	183967678	+	ECE2	ECE2	H3k27ac	1vs<1	TSSS	0.00707969311712143	6.28558351497151
chr3	186648315	186648623	+	ST6GAL1	ST6GAL1	H3k27ac	1vs<1	TSSS	0.0244664085192195	4.77157362283684
chr3	193924037	193924096	-	XLOC_020230	XLOC_020230	H3k27ac	1vs<1	TSSS	0	-Inf
chr3	197686716	197686886	-	IQCG	IQCG	H3k27ac	1vs<1	TSSS	0.00424983869849023	-7.08118090855289
chr3	138066625	138067167	+	MRAS	MRAS	H3k27me3	1vs<1	TSSS	0	-Inf
chr3	148415658	148415914	+	AGTR1	AGTR1	H3k27me3	1vs<1	TSSS	0	-Inf
chr3	170136653	170137080	+	CLDN11	CLDN11	H3k27me3	1vs<1	TSSS	0.00503008162524743	6.41845703340249
chr3	197686716	197686886	-	IQCG	IQCG	H3k79me2	1vs<1	TSSS	8.15758047266294e-05	-13.0196273880562
chr3	15900884	15901053	-	ANKRD28	ANKRD28	H2az	1vs<1	TSSS	0.00419804068398878	7.0304086447824
chr3	46506315	46506598	-	LTF	LTF	H2az	1vs<1	TSSS	0.00449882553757911	-7.64167714132077
chr3	49055833	49056017	-	DALRD3	DALRD3	H2az	1vs<1	TSSS	0.018758793153273	-5.04376878074157
chr3	79067557	79068609	-	ROBO1	ROBO1	H2az	1vs<1	TSSS	0.00169981714594466	8.60083025835582
chr3	111717586	111717961	+	TAGLN3	TAGLN3	H2az	1vs<1	TSSS	0.0345224277153315	4.85206863689235
chr3	121902530	121902659	+	CASR	CASR	H2az	1vs<1	TSSS	0	-Inf
chr3	136581050	136581161	+	NCK1	NCK1	H2az	1vs<1	TSSS	0.00290011096667871	-8.54361507442227
chr3	183967445	183967678	+	ECE2	ECE2	H2az	1vs<1	TSSS	0.00175017320884444	8.41184559776025
chr3	197686716	197686886	-	IQCG	IQCG	H2az	1vs<1	TSSS	0.000554136667310571	-10.4718150714443
chr4	15480847	15480952	+	CC2D2A	CC2D2A	H3k4me2	0vs>0	SPLICING	0.000932457743821829	-8.72387187956602
chr4	15480847	15480952	+	CC2D2A	CC2D2A	H3k4me3	0vs>0	SPLICING	0.00343419934698967	-7.23151725599023
chr4	15480847	15480952	+	CC2D2A	CC2D2A	H3k9ac	0vs>0	SPLICING	0.00629655034087597	-6.03797274920965
chr4	110618778	110618924	-	CASP6	CASP6	H3k9ac	1vs<1	SPLICING	0	-Inf
chr4	15480847	15480952	+	CC2D2A	CC2D2A	H3k27ac	0vs>0	SPLICING	0.0362866459578546	-4.42165013818898
chr4	110618778	110618924	-	CASP6	CASP6	H3k27ac	1vs<1	SPLICING	0	-Inf
chr4	110617566	110617642	-	CASP6	CASP6	H3k36me3	1vs<1	SPLICING	0.0159063333948641	-6.19379847846414
chr4	110618778	110618924	-	CASP6	CASP6	H3k36me3	1vs<1	SPLICING	0	-Inf
chr4	38870019	38870167	+	FAM114A1	FAM114A1	H3k79me2	1vs<1	SPLICING	0.0210999436123258	-5.84639737293638
chr4	110618778	110618924	-	CASP6	CASP6	H3k79me2	1vs<1	SPLICING	0	-Inf
chr4	15480847	15480952	+	CC2D2A	CC2D2A	H2az	0vs>0	SPLICING	0.00637710325666277	-5.72563862569727
chr4	156589242	156589335	+	GUCY1A3	GUCY1A3	H2az	0vs>0	SPLICING	0.0250310659293184	-4.84543107950822
chr4	2420012	2420370	-	ZFYVE28	ZFYVE28	H3k4me1	1vs<1	TSSS	0.00307164101010658	-6.48805104792885
chr4	40631413	40631883	-	RBM47	RBM47	H3k4me1	1vs<1	TSSS	0.000294851473374691	-9.41799034156547
chr4	122872621	122872909	-	TRPC3	TRPC3	H3k4me1	1vs<1	TSSS	0.0200572876322623	-6.15366494252032
chr4	5889955	5890315	-	CRMP1	CRMP1	H3k4me2	1vs<1	TSSS	0.0134860013604221	-5.35486746151241
chr4	25657435	25657512	+	SLC34A2	SLC34A2	H3k4me2	1vs<1	TSSS	0	-Inf
chr4	39046451	39046716	+	KLHL5	KLHL5	H3k4me2	1vs<1	TSSS	0.0345225995817443	-4.38081779941942
chr4	81106424	81106672	+	PRDM8	PRDM8	H3k4me2	1vs<1	TSSS	0.00461344725156839	6.44017908115862
chr4	109088711	109090112	-	LEF1	LEF1	H3k4me2	1vs<1	TSSS	0.0331908498423508	4.4292157485065
chr4	146403957	146404020	+	SMAD1	SMAD1	H3k4me2	1vs<1	TSSS	0.0103966980615755	5.39926175589473
chr4	178649911	178650171	+	LOC285501	LOC285501	H3k4me2	1vs<1	TSSS	0	-Inf
chr4	81106424	81106672	+	PRDM8	PRDM8	H3k4me3	1vs<1	TSSS	0.0163190690445043	4.7168913784088
chr4	100485070	100485189	-	RG9MTD2	RG9MTD2	H3k4me3	1vs<1	TSSS	0.00270464533369199	-7.00263722339095
chr4	120549675	120549981	-	PDE5A	PDE5A	H3k4me3	1vs<1	TSSS	0.000181300147526734	10.839286980899
chr4	130017282	130017364	+	C4orf33	C4orf33	H3k4me3	1vs<1	TSSS	0.0288355552984793	4.11794950312259
chr4	146403957	146404020	+	SMAD1	SMAD1	H3k4me3	1vs<1	TSSS	0.00040837689844717	9.47050356209512
chr4	165304339	165304407	-	MARCH1	MARCH1	H3k4me3	1vs<1	TSSS	0.000523921166923691	-9.07670106345519
chr4	178649911	178650171	+	LOC285501	LOC285501	H3k4me3	1vs<1	TSSS	0	-Inf
chr4	109088711	109090112	-	LEF1	LEF1	H3k9ac	1vs<1	TSSS	0.0418748792736645	4.44367232325239
chr4	120549675	120549981	-	PDE5A	PDE5A	H3k9ac	1vs<1	TSSS	0.0114088879669413	5.6256963004473
chr4	130017282	130017364	+	C4orf33	C4orf33	H3k9ac	1vs<1	TSSS	0.00289573845652503	7.62704654206449
chr4	146403957	146404020	+	SMAD1	SMAD1	H3k9ac	1vs<1	TSSS	0.00147533050455914	8.5764868026123
chr4	165304339	165304407	-	MARCH1	MARCH1	H3k9ac	1vs<1	TSSS	0	-Inf
chr4	169753156	169753322	+	PALLD	PALLD	H3k9ac	1vs<1	TSSS	0.0021654717001722	-10.5114559812051
chr4	190470757	190470860	+	XLOC_020955	XLOC_020955	H3k9me3	1vs<1	TSSS	0	-Inf
chr4	36283244	36283651	+	DTHD1	DTHD1	H3k27ac	1vs<1	TSSS	0	-Inf
chr4	169753156	169753322	+	PALLD	PALLD	H3k27ac	1vs<1	TSSS	0.0412769966140414	-4.8244612414821
chr4	2420012	2420370	-	ZFYVE28	ZFYVE28	H3k27me3	1vs<1	TSSS	0.00257807089464456	-6.88735248840072
chr4	6473887	6474326	-	PPP2R2C	PPP2R2C	H3k27me3	1vs<1	TSSS	0.00364807686684405	-7.10534455851654
chr4	40631413	40631883	-	RBM47	RBM47	H3k27me3	1vs<1	TSSS	0.013546948814616	-5.25536880391959
chr4	46391752	46392056	-	GABRA2	GABRA2	H3k27me3	1vs<1	TSSS	0.00306670801613508	80.0454652206219
chr4	2420012	2420370	-	ZFYVE28	ZFYVE28	H2az	1vs<1	TSSS	0.0254013824769577	4.62093342416604
chr4	40631413	40631883	-	RBM47	RBM47	H2az	1vs<1	TSSS	0.0272294627676025	-4.52028247726278
chr4	81106424	81106672	+	PRDM8	PRDM8	H2az	1vs<1	TSSS	0.0222693305700618	4.78786546165553
chr4	109088711	109090112	-	LEF1	LEF1	H2az	1vs<1	TSSS	0.00967163843401231	6.23566825637788
chr4	130017282	130017364	+	C4orf33	C4orf33	H2az	1vs<1	TSSS	0.00290011096667871	7.67022031699939
chr4	165304339	165304407	-	MARCH1	MARCH1	H2az	1vs<1	TSSS	0.00926236968747719	-5.80723156728613
chr4	178649911	178650171	+	LOC285501	LOC285501	H2az	1vs<1	TSSS	0	-Inf
chr5	176880957	176881041	+	PRR7	PRR7	H3k4me1	0vs>0	SPLICING	0.00112096278733243	8.31456295083503
chr5	141980267	141980370	-	FGF1	FGF1	H3k4me1	1vs<1	SPLICING	0	-Inf
chr5	52095719	52096954	+	ITGA1	ITGA1	H3k4me2	1vs<1	SPLICING	0.0417434715281848	-4.48720652931177
chr5	79286417	79286486	-	MTX3	MTX3	H3k4me2	1vs<1	SPLICING	0.000580712737788929	8.70772614293744
chr5	131607484	131607601	+	PDLIM4	PDLIM4	H3k4me2	1vs<1	SPLICING	0.00613556116501216	-6.14880746580328
chr5	79286417	79286486	-	MTX3	MTX3	H3k4me3	1vs<1	SPLICING	0.000268172167680118	9.29124316304152
chr5	141980267	141980370	-	FGF1	FGF1	H3k4me3	1vs<1	SPLICING	0	-Inf
chr5	52095719	52096954	+	ITGA1	ITGA1	H4k20me1	1vs<1	SPLICING	0.000668503161335177	-9.05455717776324
chr5	107040903	107041002	-	XLOC_022721	XLOC_022721	H2az	0vs>0	SPLICING	0	-Inf
chr5	79286417	79286486	-	MTX3	MTX3	H2az	1vs<1	SPLICING	0.0159531407754342	5.05476867821719
chr5	37370923	37371197	-	NUP155	NUP155	H3k4me1	1vs<1	TSSS	0	-Inf
chr5	37370923	37371197	-	NUP155	NUP155	H3k4me2	1vs<1	TSSS	0.000314935929555566	-10.4245288096926
chr5	94982583	94983778	+	RFESD	RFESD	H3k4me2	1vs<1	TSSS	0.00744905123372743	-5.78577159152625
chr5	131563483	131563556	-	P4HA2	P4HA2	H3k4me2	1vs<1	TSSS	0.0140105195881946	-5.04468165651819
chr5	137673704	137673996	+	FAM53C	FAM53C	H3k4me2	1vs<1	TSSS	0.0163354865959338	4.90030321931059
chr5	146833112	146833260	-	DPYSL3	DPYSL3	H3k4me2	1vs<1	TSSS	0.00246144263575706	8.16190931767864
chr5	149109815	149109983	+	PPARGC1B	PPARGC1B	H3k4me2	1vs<1	TSSS	0.00308952997478681	7.05398992642444
chr5	37370923	37371197	-	NUP155	NUP155	H3k4me3	1vs<1	TSSS	0.000181300147526734	-10.864285793066
chr5	94982583	94983778	+	RFESD	RFESD	H3k4me3	1vs<1	TSSS	0.00447151021768859	-6.42194011040812
chr5	114961298	114961876	-	TICAM2	TICAM2	H3k4me3	1vs<1	TSSS	0.042001901451082	-3.80037287891025
chr5	121413050	121414055	-	LOX	LOX	H3k4me3	1vs<1	TSSS	0.0261371447750032	4.22153937705449
chr5	137673704	137673996	+	FAM53C	FAM53C	H3k4me3	1vs<1	TSSS	0.0224245482808811	4.36438938249611
chr5	146833112	146833260	-	DPYSL3	DPYSL3	H3k4me3	1vs<1	TSSS	0.00542514280148475	6.64102030599989
chr5	149109815	149109983	+	PPARGC1B	PPARGC1B	H3k4me3	1vs<1	TSSS	0.000460140339502339	9.2777490650531
chr5	175298501	175298708	+	CPLX2	CPLX2	H3k4me3	1vs<1	TSSS	0.0261371447750032	217.180806737068
chr5	37370923	37371197	-	NUP155	NUP155	H3k9ac	1vs<1	TSSS	0.0236307360008457	-4.7462850199919
chr5	121413050	121414055	-	LOX	LOX	H3k9ac	1vs<1	TSSS	0.00775792038995594	6.26135912610707
chr5	138677519	138677669	+	PAIP2	PAIP2	H3k9ac	1vs<1	TSSS	0.0292818649293031	4.53950520411261
chr5	176873796	176873961	+	PRR7	PRR7	H3k9ac	1vs<1	TSSS	0.0185364230728446	-5.11634304868692
chr5	37370923	37371197	-	NUP155	NUP155	H3k27ac	1vs<1	TSSS	0.00287505260584945	-7.73035580307097
chr5	138677519	138677669	+	PAIP2	PAIP2	H3k27ac	1vs<1	TSSS	0.00929956770385091	5.86773848221518
chr5	131563483	131563556	-	P4HA2	P4HA2	H3k27me3	1vs<1	TSSS	0	-Inf
chr5	37370923	37371197	-	NUP155	NUP155	H3k36me3	1vs<1	TSSS	0	-Inf
chr5	37370923	37371197	-	NUP155	NUP155	H2az	1vs<1	TSSS	0.00531469465731779	-6.53191488866479
chr5	94982583	94983778	+	RFESD	RFESD	H2az	1vs<1	TSSS	0.0487673000190974	-3.90311184841978
chr5	146833112	146833260	-	DPYSL3	DPYSL3	H2az	1vs<1	TSSS	0.0359187825706564	4.44220114615572
chr5	176560080	176560155	+	NSD1	NSD1	H2az	1vs<1	TSSS	0.0240591998585094	4.67518997260288
chr6	4130413	4130483	-	PECI	PECI	H3k4me1	0vs>0	SPLICING	0	-Inf
chr6	135818326	135818387	-	AHI1	AHI1	H3k4me1	1vs<1	SPLICING	0	-Inf
chr6	41700387	41700505	-	TFEB	TFEB	H3k4me2	0vs>0	SPLICING	0.0221596829409023	-5.23378272849566
chr6	41908108	41908323	-	CCND3	CCND3	H3k4me2	1vs<1	SPLICING	0.000246324119311635	9.92009232408637
chr6	41908108	41908323	-	CCND3	CCND3	H3k4me3	1vs<1	SPLICING	0.000179546062664268	9.94722057337632
chr6	52288485	52288612	+	EFHC1	EFHC1	H3k9ac	0vs>0	SPLICING	0.00199881038723513	-6.74196431329429
chr6	41908108	41908323	-	CCND3	CCND3	H3k9ac	1vs<1	SPLICING	0.0296749539743374	4.44974665500048
chr6	137477896	137477991	-	IL22RA2	IL22RA2	H3k9me3	0vs>0	SPLICING	0	-Inf
chr6	4130413	4130483	-	PECI	PECI	H3k27ac	0vs>0	SPLICING	0	-Inf
chr6	7246657	7247454	+	RREB1	RREB1	H3k36me3	1vs<1	SPLICING	0.0289947219300709	-5.2807051217281
chr6	107351229	107351311	+	C6orf203	C6orf203	H3k79me2	0vs>0	SPLICING	0.0130579882321179	-5.94569778979157
chr6	41908108	41908323	-	CCND3	CCND3	H3k79me2	1vs<1	SPLICING	0.00877373678775186	6.33705895476878
chr6	10433261	10433486	-	C6orf218	C6orf218	H2az	0vs>0	SPLICING	0	-Inf
chr6	31895732	31895941	+	C2	C2	H2az	0vs>0	SPLICING	0.037094732731409	-4.69606683867384
chr6	73000382	73000564	+	RIMS1	RIMS1	H2az	0vs>0	SPLICING	0	-Inf
chr6	41908108	41908323	-	CCND3	CCND3	H2az	1vs<1	SPLICING	0.00571979784821207	6.02817233320925
chr6	10555949	10557575	+	GCNT2	GCNT2	H3k4me1	1vs<1	TSSS	0.0453564690968399	-3.97703690675222
chr6	43423725	43423786	-	DLK2	DLK2	H3k4me1	1vs<1	TSSS	0.000174208084233592	-10.3105708747574
chr6	111926979	111927474	-	TRAF3IP2	TRAF3IP2	H3k4me1	1vs<1	TSSS	0.00225236166187306	-6.86352922435149
chr6	152011631	152011799	+	ESR1	ESR1	H3k4me1	1vs<1	TSSS	0	-Inf
chr6	52284994	52285271	+	EFHC1	EFHC1	H3k4me2	1vs<1	TSSS	0.014737652178767	4.99302582882284
chr6	83902898	83903012	-	PGM3	PGM3	H3k4me2	1vs<1	TSSS	0.0067493079544157	-5.92945374949402
chr6	111926979	111927474	-	TRAF3IP2	TRAF3IP2	H3k4me2	1vs<1	TSSS	0.0463007662271981	-3.86143067750875
chr6	138820370	138820579	-	NHSL1	NHSL1	H3k4me2	1vs<1	TSSS	0.0442109798278926	3.92098118906297
chr6	152011631	152011799	+	ESR1	ESR1	H3k4me2	1vs<1	TSSS	0.00342143261299201	-7.63498007225494
chr6	163148164	163148311	+	PACRG	PACRG	H3k4me2	1vs<1	TSSS	0.0166391088853717	5.72503864561363
chr6	52284994	52285271	+	EFHC1	EFHC1	H3k4me3	1vs<1	TSSS	0.0035139275204858	6.67373282306198
chr6	106534195	106534470	+	PRDM1	PRDM1	H3k4me3	1vs<1	TSSS	0.0163190690445043	-4.72138004878532
chr6	152011631	152011799	+	ESR1	ESR1	H3k4me3	1vs<1	TSSS	0.000118793788668014	-13.6148145096778
chr6	152011631	152011799	+	ESR1	ESR1	H3k9ac	1vs<1	TSSS	0.000154587147351844	-14.7791539784002
chr6	152011631	152011799	+	ESR1	ESR1	H3k27ac	1vs<1	TSSS	0	-Inf
chr6	43423725	43423786	-	DLK2	DLK2	H3k27me3	1vs<1	TSSS	0.0340495651330291	-4.38530378780289
chr6	10555949	10557575	+	GCNT2	GCNT2	H2az	1vs<1	TSSS	0.00462024632006083	-6.74819621725018
chr6	43423725	43423786	-	DLK2	DLK2	H2az	1vs<1	TSSS	0.00531469465731779	-6.54930719226996
chr6	52284994	52285271	+	EFHC1	EFHC1	H2az	1vs<1	TSSS	0.0364117484859603	4.17981802945891
chr6	57086524	57087078	-	RAB23	RAB23	H2az	1vs<1	TSSS	9.96183552550347e-05	13.3054653533073
chr6	105584468	105584543	-	BVES	BVES	H2az	1vs<1	TSSS	0.0420636199955469	-4.2612068630706
chr6	152011631	152011799	+	ESR1	ESR1	H2az	1vs<1	TSSS	0.00143848312678086	-10.3393633466628
chr7	99270407	99270538	-	CYP3A5	CYP3A5	H3k4me1	1vs<1	SPLICING	0.000133001267468545	-10.6551865448077
chr7	102835887	102836061	-	DPY19L2P2	DPY19L2P2	H3k4me2	0vs>0	SPLICING	0	-Inf
chr7	14028893	14029089	-	ETV1	ETV1	H3k9ac	0vs>0	SPLICING	0.00643184191748092	-5.95935004438362
chr7	116140314	116140501	+	CAV2	CAV2	H3k9ac	1vs<1	SPLICING	0.0309277819268174	5.03053238138271
chr7	6438293	6438349	+	RAC1	RAC1	H4k20me1	0vs>0	SPLICING	0	-Inf
chr7	36554078	36554196	-	AOAH	AOAH	H4k20me1	0vs>0	SPLICING	0	-Inf
chr7	14028893	14029089	-	ETV1	ETV1	H3k27ac	0vs>0	SPLICING	0.0119680158916781	-5.49348784234969
chr7	36554078	36554196	-	AOAH	AOAH	H3k27ac	0vs>0	SPLICING	0	-Inf
chr7	116140314	116140501	+	CAV2	CAV2	H3k27ac	1vs<1	SPLICING	0.0402287947842157	5.14179738740355
chr7	116140314	116140501	+	CAV2	CAV2	H3k27me3	1vs<1	SPLICING	0	-Inf
chr7	6438293	6438349	+	RAC1	RAC1	H3k36me3	0vs>0	SPLICING	0.00563261075728269	-6.49223578635529
chr7	30537357	30537512	-	GGCT	GGCT	H3k36me3	0vs>0	SPLICING	0.00312618898882943	-7.17507299077014
chr7	36554078	36554196	-	AOAH	AOAH	H3k36me3	0vs>0	SPLICING	0	-Inf
chr7	92744108	92744208	-	SAMD9	SAMD9	H3k36me3	1vs<1	SPLICING	0	-Inf
chr7	30537357	30537512	-	GGCT	GGCT	H3k79me2	0vs>0	SPLICING	0.000982686144080383	-8.81681647461452
chr7	92744108	92744208	-	SAMD9	SAMD9	H3k79me2	1vs<1	SPLICING	0	-Inf
chr7	116140314	116140501	+	CAV2	CAV2	H3k79me2	1vs<1	SPLICING	0.0422856493365517	5.30723787375266
chr7	155093276	155093400	+	INSIG1	INSIG1	H3k79me2	1vs<1	SPLICING	0.000397266638418876	10.5640246437862
chr7	155093961	155094127	+	INSIG1	INSIG1	H3k79me2	1vs<1	SPLICING	0.0422856493365517	4.53305898951095
chr7	14028893	14029089	-	ETV1	ETV1	H2az	0vs>0	SPLICING	5.90951831081484e-06	-17.1221177586718
chr7	128049495	128049538	-	IMPDH1	IMPDH1	H2az	0vs>0	SPLICING	0.0232774948854847	-4.20220855523617
chr7	28725721	28725814	+	CREB5	CREB5	H3k4me1	1vs<1	TSSS	0	-Inf
chr7	18535369	18535477	+	HDAC9	HDAC9	H3k4me2	1vs<1	TSSS	0.0042634958525476	6.53672088471517
chr7	28725721	28725814	+	CREB5	CREB5	H3k4me2	1vs<1	TSSS	0.00166448445565625	-8.84793146460985
chr7	77428109	77428288	+	PHTF2	PHTF2	H3k4me2	1vs<1	TSSS	0.0390269537743996	4.03237561176801
chr7	93204004	93204042	-	CALCR	CALCR	H3k4me2	1vs<1	TSSS	0	-Inf
chr7	134464164	134464500	+	CALD1	CALD1	H3k4me2	1vs<1	TSSS	0.0444257215248685	-4.40807057005139
chr7	150974163	150974231	-	SMARCD3	SMARCD3	H3k4me2	1vs<1	TSSS	0.0067493079544157	-5.92143117581493
chr7	18535369	18535477	+	HDAC9	HDAC9	H3k4me3	1vs<1	TSSS	0.0132433752507091	5.03504334049192
chr7	28725721	28725814	+	CREB5	CREB5	H3k4me3	1vs<1	TSSS	0.00201146379512711	-8.28035936543396
chr7	77428109	77428288	+	PHTF2	PHTF2	H3k4me3	1vs<1	TSSS	0.0132433752507091	5.01646227132
chr7	93204004	93204042	-	CALCR	CALCR	H3k4me3	1vs<1	TSSS	0	-Inf
chr7	143059669	143059840	-	FAM131B	FAM131B	H3k4me3	1vs<1	TSSS	0.0157168451905521	4.76377679945585
chr7	150974163	150974231	-	SMARCD3	SMARCD3	H3k4me3	1vs<1	TSSS	0.0453591127867258	-3.71806506324883
chr7	151106322	151106468	+	LOC100131176	LOC100131176	H3k4me3	1vs<1	TSSS	0.0360958730152942	-7.35769351357869
chr7	5229835	5230124	+	WIPI2	WIPI2	H3k9ac	1vs<1	TSSS	0.0214463201794972	-5.06445188132816
chr7	150974163	150974231	-	SMARCD3	SMARCD3	H3k9ac	1vs<1	TSSS	0	-Inf
chr7	33102180	33102409	-	NT5C3	NT5C3	H3k27ac	1vs<1	TSSS	5.49669485738709e-06	18.76473269308
chr7	28725721	28725814	+	CREB5	CREB5	H3k79me2	1vs<1	TSSS	0	-Inf
chr7	77428109	77428288	+	PHTF2	PHTF2	H3k79me2	1vs<1	TSSS	0.042405269831483	-4.67474568855903
chr7	150020558	150020758	-	ACTR3C	ACTR3C	H3k79me2	1vs<1	TSSS	0.0313307100233114	-5.00032297832592
chr7	28725721	28725814	+	CREB5	CREB5	H2az	1vs<1	TSSS	0	-Inf
chr7	33102180	33102409	-	NT5C3	NT5C3	H2az	1vs<1	TSSS	0.00419804068398878	7.0643078506862
chr8	105544135	105544191	-	LRP12	LRP12	H3k4me1	1vs<1	SPLICING	0	-Inf
chr8	29202887	29203591	-	DUSP4	DUSP4	H3k4me2	0vs>0	SPLICING	0.009750571775803	-6.35921366706713
chr8	105544135	105544191	-	LRP12	LRP12	H3k9ac	1vs<1	SPLICING	0	-Inf
chr8	93966634	93966792	-	C8orf83	C8orf83	H3k9me1	1vs<1	SPLICING	0	-Inf
chr8	99101304	99102257	+	C8orf47	C8orf47	H3k9me1	1vs<1	SPLICING	0	-Inf
chr8	105544135	105544191	-	LRP12	LRP12	H3k27ac	1vs<1	SPLICING	0	-Inf
chr8	29202887	29203591	-	DUSP4	DUSP4	H3k79me2	0vs>0	SPLICING	0.0212286446779267	-6.36944717035351
chr8	144674817	144674830	-	EEF1D	EEF1D	H3k79me2	0vs>0	SPLICING	0.0274954334341889	-4.9756817711515
chr8	22224762	22224921	+	SLC39A14	SLC39A14	H3k4me1	1vs<1	TSSS	0	-Inf
chr8	27168999	27169226	+	PTK2B	PTK2B	H3k4me1	1vs<1	TSSS	0.000495271002550337	-8.66010074906045
chr8	70378859	70379185	+	SULF1	SULF1	H3k4me1	1vs<1	TSSS	0.00770797439613537	-5.96481055100093
chr8	95229426	95229531	-	CDH17	CDH17	H3k4me1	1vs<1	TSSS	0	-Inf
chr8	143751726	143751986	+	PSCA	PSCA	H3k4me1	1vs<1	TSSS	0.0072014481928158	-6.09962803445982
chr8	19171081	19171334	+	SH2D4A	SH2D4A	H3k4me2	1vs<1	TSSS	0.0345225995817443	4.37921421399383
chr8	22224762	22224921	+	SLC39A14	SLC39A14	H3k4me2	1vs<1	TSSS	0.00942160291445696	-5.49572912195598
chr8	70378859	70379185	+	SULF1	SULF1	H3k4me2	1vs<1	TSSS	0.0111271667525852	-5.71376553819749
chr8	70747089	70747299	-	SLCO5A1	SLCO5A1	H3k4me2	1vs<1	TSSS	0.0131220031194957	5.52718841353571
chr8	95229426	95229531	-	CDH17	CDH17	H3k4me2	1vs<1	TSSS	0	-Inf
chr8	143751726	143751986	+	PSCA	PSCA	H3k4me2	1vs<1	TSSS	0.028522287324603	-4.61185569079368
chr8	144241353	144241457	-	LY6H	LY6H	H3k4me2	1vs<1	TSSS	0	-Inf
chr8	19171081	19171334	+	SH2D4A	SH2D4A	H3k4me3	1vs<1	TSSS	0.018099872056827	4.89063777375293
chr8	66556888	66557019	+	MTFR1	MTFR1	H3k4me3	1vs<1	TSSS	0.0329724456223654	4.00848765609571
chr8	70378859	70379185	+	SULF1	SULF1	H3k4me3	1vs<1	TSSS	0.0392936410182838	-4.05247114133627
chr8	70747089	70747299	-	SLCO5A1	SLCO5A1	H3k4me3	1vs<1	TSSS	0.00515570102146608	6.71738936437013
chr8	143751726	143751986	+	PSCA	PSCA	H3k4me3	1vs<1	TSSS	0.0113313077241038	-5.63293110639353
chr8	32405728	32406344	+	NRG1	NRG1	H3k9ac	1vs<1	TSSS	0.0234856498113406	5.10144041133334
chr8	70378859	70379185	+	SULF1	SULF1	H3k9ac	1vs<1	TSSS	0.0111184450671966	-6.16739934321523
chr8	143751726	143751986	+	PSCA	PSCA	H3k9ac	1vs<1	TSSS	0.0111184450671966	-6.18479799584729
chr8	22224762	22224921	+	SLC39A14	SLC39A14	H3k27ac	1vs<1	TSSS	0.00580182138178088	6.59526667070892
chr8	54793442	54793644	+	RGS20	RGS20	H3k27ac	1vs<1	TSSS	0.0447900370279172	-4.64657955568936
chr8	143751726	143751986	+	PSCA	PSCA	H3k27ac	1vs<1	TSSS	0.00287505260584945	-8.79177889916615
chr8	22224762	22224921	+	SLC39A14	SLC39A14	H3k27me3	1vs<1	TSSS	0	-Inf
chr8	143751726	143751986	+	PSCA	PSCA	H3k79me2	1vs<1	TSSS	8.33497451677989e-05	-15.0565623787368
chr8	32405728	32406344	+	NRG1	NRG1	H2az	1vs<1	TSSS	0.0161610799211498	5.63243751380221
chr8	70378859	70379185	+	SULF1	SULF1	H2az	1vs<1	TSSS	0.0272294627676025	-4.8199922576078
chr8	143751726	143751986	+	PSCA	PSCA	H2az	1vs<1	TSSS	0.0345224277153315	-4.50710458290839
chr9	131600497	131600646	-	CCBL1	CCBL1	H3k4me1	1vs<1	SPLICING	0	-Inf
chr9	116345730	116346707	+	RGS3	RGS3	H3k4me2	1vs<1	SPLICING	0	-Inf
chr9	124115498	124115580	-	STOM	STOM	H3k4me2	1vs<1	SPLICING	0	-Inf
chr9	131600497	131600646	-	CCBL1	CCBL1	H3k4me2	1vs<1	SPLICING	0	-Inf
chr9	124115498	124115580	-	STOM	STOM	H3k4me3	1vs<1	SPLICING	0	-Inf
chr9	116345730	116346707	+	RGS3	RGS3	H3k9ac	1vs<1	SPLICING	0	-Inf
chr9	34216672	34216787	+	UBAP1	UBAP1	H4k20me1	0vs>0	SPLICING	0	-Inf
chr9	116345730	116346707	+	RGS3	RGS3	H3k27ac	1vs<1	SPLICING	0.000174340137877879	-10.0781695161239
chr9	124115498	124115580	-	STOM	STOM	H3k27ac	1vs<1	SPLICING	0	-Inf
chr9	131600497	131600646	-	CCBL1	CCBL1	H3k27ac	1vs<1	SPLICING	0	-Inf
chr9	32550772	32550966	-	TOPORS	TOPORS	H3k79me2	1vs<1	SPLICING	0.00511446275235673	6.97137304733768
chr9	32550772	32550966	-	TOPORS	TOPORS	H2az	1vs<1	SPLICING	0.00550595481918425	6.18403698468611
chr9	4299421	4300035	-	GLIS3	GLIS3	H3k4me1	1vs<1	TSSS	0.0188599086035504	-4.7106040551396
chr9	14313481	14314045	-	NFIB	NFIB	H3k4me1	1vs<1	TSSS	0	-Inf
chr9	71939488	71939546	+	FAM189A2	FAM189A2	H3k4me1	1vs<1	TSSS	0	-Inf
chr9	99329050	99329203	-	CDC14B	CDC14B	H3k4me1	1vs<1	TSSS	0	-Inf
chr9	100263462	100263549	+	TMOD1	TMOD1	H3k4me1	1vs<1	TSSS	0.00507344542277008	-5.98088406629951
chr9	106854370	106854755	-	XLOC_029285	XLOC_029285	H3k4me1	1vs<1	TSSS	0.024351164765175	4.7687366834554
chr9	130540870	130541048	-	SH2D3C	SH2D3C	H3k4me1	1vs<1	TSSS	0.000235576303597683	-9.80089744768109
chr9	133589268	133589842	+	ABL1	ABL1	H3k4me1	1vs<1	TSSS	0.0106023185744195	-5.20051484937155
chr9	87283466	87283700	+	NTRK2	NTRK2	H3k4me2	1vs<1	TSSS	0.0108426230629426	5.76886375760165
chr9	88714326	88714510	-	GOLM1	GOLM1	H3k4me2	1vs<1	TSSS	0.0242760027725231	4.50494478628262
chr9	99329050	99329203	-	CDC14B	CDC14B	H3k4me2	1vs<1	TSSS	0.00246144263575706	-7.40902586958416
chr9	114361619	114361711	-	PTGR1	PTGR1	H3k4me2	1vs<1	TSSS	0.0211935058064706	4.61759889618182
chr9	130742271	130742812	-	FAM102A	FAM102A	H3k4me2	1vs<1	TSSS	0.0428850031754939	-4.03573704099228
chr9	131451509	131451934	+	SET	SET	H3k4me2	1vs<1	TSSS	0.0042634958525476	-6.54851581209678
chr9	137001210	137001322	+	WDR5	WDR5	H3k4me2	1vs<1	TSSS	0.00119355873527974	-8.35833979402907
chr9	6757641	6758203	+	KDM4C	KDM4C	H3k4me3	1vs<1	TSSS	0.043925155095402	-3.75172288599282
chr9	23825804	23826063	-	ELAVL2	ELAVL2	H3k4me3	1vs<1	TSSS	0.0470514337782438	4.54220368712402
chr9	34989725	34989828	+	DNAJB5	DNAJB5	H3k4me3	1vs<1	TSSS	0.0166838527988921	-4.68726208443256
chr9	35490007	35490169	+	RUSC2	RUSC2	H3k4me3	1vs<1	TSSS	0.0001108582219536	11.8881700813257
chr9	71939488	71939546	+	FAM189A2	FAM189A2	H3k4me3	1vs<1	TSSS	0.010227832861401	-7.44286846953573
chr9	87283466	87283700	+	NTRK2	NTRK2	H3k4me3	1vs<1	TSSS	0.00963791358682249	5.83463312919108
chr9	114361619	114361711	-	PTGR1	PTGR1	H3k4me3	1vs<1	TSSS	0.00459898694856664	6.36896004307032
chr9	35490007	35490169	+	RUSC2	RUSC2	H3k9ac	1vs<1	TSSS	0.00322138692996975	7.45957603860588
chr9	88714326	88714510	-	GOLM1	GOLM1	H3k9ac	1vs<1	TSSS	0.0222030156518516	4.88885591590667
chr9	99329050	99329203	-	CDC14B	CDC14B	H3k9ac	1vs<1	TSSS	0.013671327643168	-5.44681725978698
chr9	131451509	131451934	+	SET	SET	H3k9ac	1vs<1	TSSS	0.0222334075089653	-4.86865420312248
chr9	4299421	4300035	-	GLIS3	GLIS3	H3k9me3	1vs<1	TSSS	0	-Inf
chr9	14313481	14314045	-	NFIB	NFIB	H3k27ac	1vs<1	TSSS	0.0144610965799666	5.73232182238398
chr9	35490007	35490169	+	RUSC2	RUSC2	H3k27ac	1vs<1	TSSS	0.00424983869849023	7.09878502619826
chr9	131451509	131451934	+	SET	SET	H3k27ac	1vs<1	TSSS	0.0447900370279172	-4.06389560145502
chr9	4299421	4300035	-	GLIS3	GLIS3	H3k27me3	1vs<1	TSSS	0.00174164555456489	-7.37035151918487
chr9	99329050	99329203	-	CDC14B	CDC14B	H3k27me3	1vs<1	TSSS	3.36717131244983e-05	-13.0626958473974
chr9	100263462	100263549	+	TMOD1	TMOD1	H3k27me3	1vs<1	TSSS	0.0268287856610345	-4.61003660089191
chr9	14313481	14314045	-	NFIB	NFIB	H2az	1vs<1	TSSS	0.0337733577941687	-4.56270330010201
chr9	34989725	34989828	+	DNAJB5	DNAJB5	H2az	1vs<1	TSSS	0.00672101006999383	-6.18946343789679
chr9	77502547	77502636	-	TRPM6	TRPM6	H2az	1vs<1	TSSS	0.0210753170861399	4.84493920735493
chr9	99329050	99329203	-	CDC14B	CDC14B	H2az	1vs<1	TSSS	0.0165887157975089	-5.19480471014931
chr9	133589268	133589842	+	ABL1	ABL1	H2az	1vs<1	TSSS	0.0384393167407311	-4.1236329487886
chrX	30265507	30265589	+	MAGEB1	MAGEB1	H3k4me2	0vs>0	SPLICING	0	-Inf
chrX	151903727	151903942	+	CSAG1	CSAG1	H3k4me2	0vs>0	SPLICING	0	-Inf
chrX	30265507	30265589	+	MAGEB1	MAGEB1	H3k4me3	0vs>0	SPLICING	0	-Inf
chrX	51637723	51637890	+	MAGED1	MAGED1	H3k4me3	0vs>0	SPLICING	0.00343419934698967	6.65660703083143
chrX	151903727	151903942	+	CSAG1	CSAG1	H3k4me3	0vs>0	SPLICING	0	-Inf
chrX	30265507	30265589	+	MAGEB1	MAGEB1	H3k9ac	0vs>0	SPLICING	0	-Inf
chrX	51637723	51637890	+	MAGED1	MAGED1	H3k9ac	0vs>0	SPLICING	0.0024971612437098	6.46638405331518
chrX	71840575	71840751	-	PHKA1	PHKA1	H3k9ac	0vs>0	SPLICING	0.025291213430367	-4.17889221520225
chrX	151903727	151903942	+	CSAG1	CSAG1	H3k9ac	0vs>0	SPLICING	0	-Inf
chrX	78618920	78619051	-	ITM2A	ITM2A	H3k9ac	1vs<1	SPLICING	0	-Inf
chrX	100872493	100872574	-	ARMCX6	ARMCX6	H3k9ac	1vs<1	SPLICING	0.0030002362828995	6.50297754893513
chrX	30265507	30265589	+	MAGEB1	MAGEB1	H3k27ac	0vs>0	SPLICING	0	-Inf
chrX	151903727	151903942	+	CSAG1	CSAG1	H3k27ac	0vs>0	SPLICING	0	-Inf
chrX	51637723	51637890	+	MAGED1	MAGED1	H3k27me3	0vs>0	SPLICING	0	-Inf
chrX	65390400	65390579	+	HEPH	HEPH	H3k27me3	0vs>0	SPLICING	0	-Inf
chrX	71840575	71840751	-	PHKA1	PHKA1	H3k27me3	0vs>0	SPLICING	0.00880954007819236	-5.40183982340905
chrX	30265507	30265589	+	MAGEB1	MAGEB1	H3k79me2	0vs>0	SPLICING	0	-Inf
chrX	151903727	151903942	+	CSAG1	CSAG1	H3k79me2	0vs>0	SPLICING	0	-Inf
chrX	30265507	30265589	+	MAGEB1	MAGEB1	H2az	0vs>0	SPLICING	0	-Inf
chrX	51637723	51637890	+	MAGED1	MAGED1	H2az	0vs>0	SPLICING	0	-Inf
chrX	151903727	151903942	+	CSAG1	CSAG1	H2az	0vs>0	SPLICING	0	-Inf
chrX	69672155	69672605	+	DLG3	DLG3	H3k4me1	1vs<1	TSSS	0.0137619988862825	-4.97361645670689
chrX	24690687	24690979	-	PCYT1B	PCYT1B	H3k4me2	1vs<1	TSSS	4.92966460480665e-05	-13.9345216553792
chrX	46771868	46772154	+	PHF16	PHF16	H3k4me2	1vs<1	TSSS	0.00218655831030121	-7.57156263432655
chrX	53310678	53310796	-	IQSEC2	IQSEC2	H3k4me2	1vs<1	TSSS	0.0174940561549688	4.82528891679228
chrX	117251240	117251303	-	KLHL13	KLHL13	H3k4me2	1vs<1	TSSS	0.0442109798278926	-3.92402624976428
chrX	128977672	128977910	-	ZDHHC9	ZDHHC9	H3k4me2	1vs<1	TSSS	0.0323106220002115	-4.22335110833267
chrX	15518900	15519063	+	BMX	BMX	H3k4me3	1vs<1	TSSS	0.0181418017290138	-7.36751221434428
chrX	24690687	24690979	-	PCYT1B	PCYT1B	H3k4me3	1vs<1	TSSS	2.70316442478779e-05	-14.7063828363397
chrX	53310678	53310796	-	IQSEC2	IQSEC2	H3k4me3	1vs<1	TSSS	0.0141697524469123	4.86335711527162
chrX	66763874	66766604	+	AR	AR	H3k4me3	1vs<1	TSSS	0.0270127430125508	-4.83304593142873
chrX	117251240	117251303	-	KLHL13	KLHL13	H3k4me3	1vs<1	TSSS	0.0442189079150478	-3.74141390496633
chrX	152110215	152110374	+	ZNF185	ZNF185	H3k4me3	1vs<1	TSSS	0.0366815897337337	4.11374263874579
chrX	154114409	154114577	-	F8	F8	H3k4me3	1vs<1	TSSS	0	-Inf
chrX	15518900	15519063	+	BMX	BMX	H3k9ac	1vs<1	TSSS	0	-Inf
chrX	24690687	24690979	-	PCYT1B	PCYT1B	H3k9ac	1vs<1	TSSS	0	-Inf
chrX	119737744	119738102	+	MCTS1	MCTS1	H3k9ac	1vs<1	TSSS	0.0222030156518516	4.88568084598423
chrX	66763874	66766604	+	AR	AR	H3k9me1	1vs<1	TSSS	0	-Inf
chrX	15518900	15519063	+	BMX	BMX	H3k27ac	1vs<1	TSSS	0.00707969311712143	-12.6343767220635
chrX	24690687	24690979	-	PCYT1B	PCYT1B	H3k27ac	1vs<1	TSSS	0	-Inf
chrX	119737744	119738102	+	MCTS1	MCTS1	H3k27ac	1vs<1	TSSS	0.00287505260584945	7.72281369159548
chrX	154114409	154114577	-	F8	F8	H3k27ac	1vs<1	TSSS	0	-Inf
chrX	69672155	69672605	+	DLG3	DLG3	H3k27me3	1vs<1	TSSS	0	-Inf
chrX	15518900	15519063	+	BMX	BMX	H3k79me2	1vs<1	TSSS	0	-Inf
chrX	105969894	105970627	+	RNF128	RNF128	H2az	1vs<1	TSSS	0.014649569652832	9.45074632149285
chrX	107682588	107682704	-	COL4A6	COL4A6	H2az	1vs<1	TSSS	0.00169981714594466	-9.61728449612878
chrX	119737744	119738102	+	MCTS1	MCTS1	H2az	1vs<1	TSSS	0.00341215887840787	7.33095604801659
chrY	2803112	2803487	+	ZFY	ZFY	H3k9ac	1vs<1	TSSS	0.00850828769604203	-11.9045520945962
chrY	2803112	2803487	+	ZFY	ZFY	H3k27ac	1vs<1	TSSS	0.0144610965799666	-9.32825363281393

## Sheet: Hepg2
Chr	Start	End	Strand	GeneID	GeneName	Histone	Comparison	SplicingOrTsss	PVal	Statistic
chr1	100733056	100733094	+	RTCD1	RTCD1	H3k4me1	0vs>0	SPLICING	5.67227310763841e-05	-11.8009560797937
chr1	172292469	172292480	+	DNM3	DNM3	H3k4me1	0vs>0	SPLICING	0.0215588544715497	-4.8842424093886
chr1	22351299	22351448	-	HSPC157	HSPC157	H3k4me1	1vs<1	SPLICING	0.000390618304848219	-10.2177396223278
chr1	110037142	110037245	+	CYB561D1	CYB561D1	H3k4me1	1vs<1	SPLICING	0.0128565553499599	-5.17924865449768
chr1	155209407	155209553	-	GBA	GBA	H3k4me1	1vs<1	SPLICING	8.67253740133469e-05	-11.2367452553355
chr1	204946809	204946853	+	NFASC	NFASC	H3k4me1	1vs<1	SPLICING	0	-Inf
chr1	221912276	221913129	-	DUSP10	DUSP10	H3k4me1	1vs<1	SPLICING	0.0190098938158443	-5.11505495698051
chr1	1355432	1355972	-	LOC441869	LOC441869	H3k4me2	0vs>0	SPLICING	0.00511475987546575	-6.24853288089825
chr1	100733056	100733094	+	RTCD1	RTCD1	H3k4me2	0vs>0	SPLICING	0.00179057674416644	-6.95590014579597
chr1	206810220	206810313	+	DYRK3	DYRK3	H3k4me2	0vs>0	SPLICING	0.00397180309798767	6.02050653689893
chr1	242012414	242012518	+	EXO1	EXO1	H3k4me2	0vs>0	SPLICING	0.000207377212725029	9.68624715075466
chr1	1560371	1560565	+	MIB2	MIB2	H3k4me2	1vs<1	SPLICING	0	-Inf
chr1	155209407	155209553	-	GBA	GBA	H3k4me2	1vs<1	SPLICING	0	-Inf
chr1	221912276	221913129	-	DUSP10	DUSP10	H3k4me2	1vs<1	SPLICING	0.0397187409809007	-4.31343900126737
chr1	1355432	1355972	-	LOC441869	LOC441869	H3k4me3	0vs>0	SPLICING	0.0214159685333048	-4.43776317024847
chr1	228295678	228295785	-	MRPL55	MRPL55	H3k4me3	0vs>0	SPLICING	0.00103438927771824	-7.13311041749978
chr1	242012414	242012518	+	EXO1	EXO1	H3k4me3	0vs>0	SPLICING	0.00221172894895362	6.27710141260849
chr1	68151708	68151809	+	GADD45A	GADD45A	H3k4me3	1vs<1	SPLICING	0.0495148805254363	-3.7424903303412
chr1	110037142	110037245	+	CYB561D1	CYB561D1	H3k4me3	1vs<1	SPLICING	0.00175164218219358	-6.85936665021932
chr1	155209407	155209553	-	GBA	GBA	H3k4me3	1vs<1	SPLICING	0	-Inf
chr1	221912276	221913129	-	DUSP10	DUSP10	H3k4me3	1vs<1	SPLICING	0.035666654095098	-4.29295354752732
chr1	9943763	9943796	-	CTNNBIP1	CTNNBIP1	H3k9ac	0vs>0	SPLICING	0	-Inf
chr1	228295678	228295785	-	MRPL55	MRPL55	H3k9ac	0vs>0	SPLICING	0	-Inf
chr1	242012414	242012518	+	EXO1	EXO1	H3k9ac	0vs>0	SPLICING	0.0388787069538602	3.78529018782519
chr1	10493899	10494022	+	APITD1	APITD1	H3k9ac	1vs<1	SPLICING	0.00319283086691015	-5.92347480057341
chr1	16782313	16782388	+	NECAP2	NECAP2	H3k9ac	1vs<1	SPLICING	0	-Inf
chr1	24718051	24718169	-	C1orf201	C1orf201	H3k9ac	1vs<1	SPLICING	0.0432785784308921	3.84525284553562
chr1	68151708	68151809	+	GADD45A	GADD45A	H3k9ac	1vs<1	SPLICING	0.0432785784308921	-3.69152507195234
chr1	110037765	110037802	+	CYB561D1	CYB561D1	H3k9ac	1vs<1	SPLICING	0	-Inf
chr1	155209407	155209553	-	GBA	GBA	H3k9ac	1vs<1	SPLICING	0	-Inf
chr1	156203419	156203519	+	BGLAP	BGLAP	H3k9ac	1vs<1	SPLICING	0.0302205163263511	-3.97957026171027
chr1	43642792	43642882	+	WDR65	WDR65	H3k9me3	0vs1	SPLICING	0	-Inf
chr1	156202111	156202216	+	BGLAP	BGLAP	H3k9me3	1vs<1	SPLICING	0	-Inf
chr1	43642792	43642882	+	WDR65	WDR65	H4k20me1	0vs1	SPLICING	8.87271767208356e-05	-8.78210973506676
chr1	42789355	42789498	-	FOXJ3	FOXJ3	H4k20me1	0vs>0	SPLICING	0.0435057874969549	-3.99700150024125
chr1	100733056	100733094	+	RTCD1	RTCD1	H4k20me1	0vs>0	SPLICING	0	-Inf
chr1	228295678	228295785	-	MRPL55	MRPL55	H4k20me1	0vs>0	SPLICING	0	-Inf
chr1	10493899	10494022	+	APITD1	APITD1	H4k20me1	1vs<1	SPLICING	0	-Inf
chr1	17312958	17313127	-	ATP13A2	ATP13A2	H4k20me1	1vs<1	SPLICING	0	-Inf
chr1	155650207	155650247	-	YY1AP1	YY1AP1	H4k20me1	1vs<1	SPLICING	0.00547162513408691	-5.52696547932342
chr1	221912276	221913129	-	DUSP10	DUSP10	H4k20me1	1vs<1	SPLICING	0.00614336719989354	-5.83865486939091
chr1	68947729	68948580	-	DEPDC1	DEPDC1	H3k27ac	0vs>0	SPLICING	0	-Inf
chr1	150978577	150978723	-	FAM63A	FAM63A	H3k27ac	0vs>0	SPLICING	0.0146043557357384	-4.67132275550517
chr1	22351299	22351448	-	HSPC157	HSPC157	H3k27ac	1vs<1	SPLICING	0.000467233460891866	9.86733157830895
chr1	24718051	24718169	-	C1orf201	C1orf201	H3k27ac	1vs<1	SPLICING	0.0151692268738141	5.01984325442877
chr1	110037142	110037245	+	CYB561D1	CYB561D1	H3k27ac	1vs<1	SPLICING	0.000579181430857135	-8.33849726250988
chr1	182638759	182638887	-	RGS8	RGS8	H3k27me3	0vs1	SPLICING	0	-Inf
chr1	17939553	17939669	+	ARHGEF10L	ARHGEF10L	H3k27me3	0vs>0	SPLICING	0.000311584734583275	-8.85666158998186
chr1	87598347	87598546	+	LOC339524	LOC339524	H3k27me3	0vs>0	SPLICING	0.00327092687866681	-6.21454904809402
chr1	206810220	206810313	+	DYRK3	DYRK3	H3k27me3	0vs>0	SPLICING	0	-Inf
chr1	6522923	6523030	-	PLEKHG5	PLEKHG5	H3k27me3	1vs<1	SPLICING	0	-Inf
chr1	156195348	156195459	+	BGLAP	BGLAP	H3k36me3	0vs>0	SPLICING	0	-Inf
chr1	1560371	1560565	+	MIB2	MIB2	H3k36me3	1vs<1	SPLICING	0	-Inf
chr1	16782313	16782388	+	NECAP2	NECAP2	H3k36me3	1vs<1	SPLICING	0.00381898449104387	-6.87689228527865
chr1	155209407	155209553	-	GBA	GBA	H3k36me3	1vs<1	SPLICING	0.0181756871189079	-4.91932699387516
chr1	156203419	156203519	+	BGLAP	BGLAP	H3k36me3	1vs<1	SPLICING	3.01172952379736e-05	-14.2831773439354
chr1	221912276	221913129	-	DUSP10	DUSP10	H3k36me3	1vs<1	SPLICING	0.0157438809800442	-5.45997552696229
chr1	1690540	1690682	-	NADK	NADK	H3k79me2	0vs>0	SPLICING	0.0170561275051613	4.4461280411098
chr1	8852463	8852647	-	RERE	RERE	H3k79me2	0vs>0	SPLICING	0.00922369002314207	-5.05932315972227
chr1	42781017	42781126	-	FOXJ3	FOXJ3	H3k79me2	0vs>0	SPLICING	0.0302741390075612	-3.9926907388966
chr1	42789355	42789498	-	FOXJ3	FOXJ3	H3k79me2	0vs>0	SPLICING	0.0128917773862299	-4.69500647917783
chr1	100733056	100733094	+	RTCD1	RTCD1	H3k79me2	0vs>0	SPLICING	0.00214778330794871	-6.58357087248405
chr1	1560371	1560565	+	MIB2	MIB2	H3k79me2	1vs<1	SPLICING	0	-Inf
chr1	10493899	10494022	+	APITD1	APITD1	H3k79me2	1vs<1	SPLICING	0	-Inf
chr1	39338690	39338762	-	GJA9	GJA9	H3k79me2	1vs<1	SPLICING	0.0193393431903907	-5.42954409499572
chr1	44437059	44437742	+	DPH2	DPH2	H3k79me2	1vs<1	SPLICING	0.0212441996743993	4.50352147295859
chr1	110037142	110037245	+	CYB561D1	CYB561D1	H3k79me2	1vs<1	SPLICING	0	-Inf
chr1	155650207	155650247	-	YY1AP1	YY1AP1	H3k79me2	1vs<1	SPLICING	0.0217925969321326	-4.4674428053076
chr1	221912276	221913129	-	DUSP10	DUSP10	H3k79me2	1vs<1	SPLICING	0.000442907055349633	-9.91731328629249
chr1	43642792	43642882	+	WDR65	WDR65	H2az	0vs1	SPLICING	0	-Inf
chr1	176197321	176197385	+	XLOC_001101	XLOC_001101	H2az	0vs1	SPLICING	0	-Inf
chr1	1355432	1355972	-	LOC441869	LOC441869	H2az	0vs>0	SPLICING	0.00301118894980651	-6.46136293436403
chr1	206810220	206810313	+	DYRK3	DYRK3	H2az	0vs>0	SPLICING	0	-Inf
chr1	1560371	1560565	+	MIB2	MIB2	H2az	1vs<1	SPLICING	0	-Inf
chr1	68151708	68151809	+	GADD45A	GADD45A	H2az	1vs<1	SPLICING	0.00767095551539521	-5.09115521768293
chr1	110037142	110037245	+	CYB561D1	CYB561D1	H2az	1vs<1	SPLICING	0.00315946621668546	-5.99489393126604
chr1	32716840	32716972	+	LCK	LCK	H3k4me1	1vs<1	TSSS	0.00573298591540531	-7.2822361720609
chr1	183559975	183560056	-	NCF2	NCF2	H3k4me1	1vs<1	TSSS	0	-Inf
chr1	1550795	1551013	+	MIB2	MIB2	H3k4me2	1vs<1	TSSS	0.00654604706939998	-5.939423576031
chr1	31885963	31886151	+	SERINC2	SERINC2	H3k4me2	1vs<1	TSSS	0.00375147753490542	6.8367313649458
chr1	32716840	32716972	+	LCK	LCK	H3k4me2	1vs<1	TSSS	0	-Inf
chr1	34632624	34632772	+	C1orf94	C1orf94	H3k4me2	1vs<1	TSSS	0	-Inf
chr1	45805571	45805629	-	MUTYH	MUTYH	H3k4me2	1vs<1	TSSS	0.0115499355303632	-5.23709036369304
chr1	86043667	86044046	-	DDAH1	DDAH1	H3k4me2	1vs<1	TSSS	0.0203920303332706	4.99569527947465
chr1	113249700	113250025	-	RHOC	RHOC	H3k4me2	1vs<1	TSSS	0.0194140493083825	-4.73161918748318
chr1	156675501	156675608	-	CRABP2	CRABP2	H3k4me2	1vs<1	TSSS	0.00549039593021178	6.19429826750161
chr1	182360814	182361341	-	GLUL	GLUL	H3k4me2	1vs<1	TSSS	0.0212518122720234	4.62715170827436
chr1	183559975	183560056	-	NCF2	NCF2	H3k4me2	1vs<1	TSSS	0.0430745941949784	-4.1347567221074
chr1	235491869	235492093	+	GGPS1	GGPS1	H3k4me2	1vs<1	TSSS	0.0149729928653374	-4.99472057058413
chr1	1447910	1448070	+	ATAD3A	ATAD3A	H3k4me3	1vs<1	TSSS	0.00970564897782871	-5.09752016953231
chr1	1550795	1551013	+	MIB2	MIB2	H3k4me3	1vs<1	TSSS	5.38418916036423e-05	-13.0523291186515
chr1	21671869	21672034	-	ECE1	ECE1	H3k4me3	1vs<1	TSSS	0.00488007232256486	-5.82303174411139
chr1	26146397	26146520	+	FAM54B	FAM54B	H3k4me3	1vs<1	TSSS	0.00434492927849204	-6.00259619707211
chr1	26438268	26438406	+	PDIK1L	PDIK1L	H3k4me3	1vs<1	TSSS	0.00545770986204934	-5.68527710090099
chr1	31885963	31886151	+	SERINC2	SERINC2	H3k4me3	1vs<1	TSSS	8.68228126895522e-06	17.0776232489076
chr1	32716840	32716972	+	LCK	LCK	H3k4me3	1vs<1	TSSS	0	-Inf
chr1	34632624	34632772	+	C1orf94	C1orf94	H3k4me3	1vs<1	TSSS	0	-Inf
chr1	45805571	45805629	-	MUTYH	MUTYH	H3k4me3	1vs<1	TSSS	0.00311247353876233	-6.40826013024522
chr1	46664008	46664121	-	POMGNT1	POMGNT1	H3k4me3	1vs<1	TSSS	0.0147995778142383	-4.59794393061956
chr1	61542946	61543300	+	NFIA	NFIA	H3k4me3	1vs<1	TSSS	0.0104460585755478	5.01470916054832
chr1	86043667	86044046	-	DDAH1	DDAH1	H3k4me3	1vs<1	TSSS	0.00688076991797066	5.86361178447058
chr1	91966404	91966505	+	CDC7	CDC7	H3k4me3	1vs<1	TSSS	0.018443901168756	-4.36261209077808
chr1	108742578	108742974	-	SLC25A24	SLC25A24	H3k4me3	1vs<1	TSSS	0.00153844851923604	-7.28890407853722
chr1	113249700	113250025	-	RHOC	RHOC	H3k4me3	1vs<1	TSSS	0.000257992106673951	-10.2974623307532
chr1	173793276	173793777	-	CENPL	CENPL	H3k4me3	1vs<1	TSSS	0.0234185989844669	4.11542956854545
chr1	201476198	201476387	-	CSRP1	CSRP1	H3k4me3	1vs<1	TSSS	0.00429838682307662	6.03490699851732
chr1	212731196	212732111	+	XLOC_001289	XLOC_001289	H3k4me3	1vs<1	TSSS	0.000127684879382325	-11.5245047644769
chr1	223900119	223900579	+	CAPN2	CAPN2	H3k4me3	1vs<1	TSSS	0.00041243189949049	-9.57008574390008
chr1	236686739	236686924	+	LGALS8	LGALS8	H3k4me3	1vs<1	TSSS	0.0344477319043608	3.97400627050725
chr1	242687899	242687998	-	PLD5	PLD5	H3k4me3	1vs<1	TSSS	0	-Inf
chr1	1447910	1448070	+	ATAD3A	ATAD3A	H3k9ac	1vs<1	TSSS	0.0075310831082746	-5.30903122287268
chr1	1550795	1551013	+	MIB2	MIB2	H3k9ac	1vs<1	TSSS	0.000323187034644502	-9.68905533882095
chr1	21671869	21672034	-	ECE1	ECE1	H3k9ac	1vs<1	TSSS	0.00446086238492132	-5.8521497718945
chr1	26146397	26146520	+	FAM54B	FAM54B	H3k9ac	1vs<1	TSSS	7.09445720013975e-05	-12.4979131803579
chr1	26438268	26438406	+	PDIK1L	PDIK1L	H3k9ac	1vs<1	TSSS	0.00893803934503413	-5.1183961030437
chr1	31885963	31886151	+	SERINC2	SERINC2	H3k9ac	1vs<1	TSSS	0.000565773052808161	8.55861692064084
chr1	32716840	32716972	+	LCK	LCK	H3k9ac	1vs<1	TSSS	0.000603320746393511	-11.2712112888434
chr1	34632624	34632772	+	C1orf94	C1orf94	H3k9ac	1vs<1	TSSS	0	-Inf
chr1	45805571	45805629	-	MUTYH	MUTYH	H3k9ac	1vs<1	TSSS	3.22241249381198e-05	-14.3205934108688
chr1	46664008	46664121	-	POMGNT1	POMGNT1	H3k9ac	1vs<1	TSSS	0.00893803934503413	-5.11331366223905
chr1	86043667	86044046	-	DDAH1	DDAH1	H3k9ac	1vs<1	TSSS	0.0188444230873258	4.61897184286505
chr1	91487547	91487671	-	ZNF644	ZNF644	H3k9ac	1vs<1	TSSS	0.0237758655620296	6.33045030606014
chr1	91966404	91966505	+	CDC7	CDC7	H3k9ac	1vs<1	TSSS	2.97136143757598e-05	-14.5854469424923
chr1	100315640	100315971	+	AGL	AGL	H3k9ac	1vs<1	TSSS	0.0177997964562141	-4.41524611385256
chr1	108742578	108742974	-	SLC25A24	SLC25A24	H3k9ac	1vs<1	TSSS	0.000349471310611933	-9.54910995943023
chr1	113249700	113250025	-	RHOC	RHOC	H3k9ac	1vs<1	TSSS	0.000481848487458437	-8.828020847895
chr1	212731196	212732111	+	XLOC_001289	XLOC_001289	H3k9ac	1vs<1	TSSS	0.0024535289633167	-6.47700442264092
chr1	212781994	212782272	+	ATF3	ATF3	H3k9ac	1vs<1	TSSS	0.00288468472404142	-6.27864739894967
chr1	223900119	223900579	+	CAPN2	CAPN2	H3k9ac	1vs<1	TSSS	0.000494519057175276	-8.76982848423804
chr1	21995747	21995856	-	RAP1GAP	RAP1GAP	H3k9me3	1vs<1	TSSS	0	-Inf
chr1	108742578	108742974	-	SLC25A24	SLC25A24	H3k9me3	1vs<1	TSSS	0	-Inf
chr1	154841508	154842754	-	KCNN3	KCNN3	H3k9me3	1vs<1	TSSS	0	-Inf
chr1	223900119	223900579	+	CAPN2	CAPN2	H3k9me3	1vs<1	TSSS	0	-Inf
chr1	1550795	1551013	+	MIB2	MIB2	H4k20me1	1vs<1	TSSS	0	-Inf
chr1	1447910	1448070	+	ATAD3A	ATAD3A	H3k27ac	1vs<1	TSSS	0.0045636457368054	-5.67099129182986
chr1	1550795	1551013	+	MIB2	MIB2	H3k27ac	1vs<1	TSSS	8.70037651809319e-05	-11.5667432477161
chr1	21671869	21672034	-	ECE1	ECE1	H3k27ac	1vs<1	TSSS	0.00161389729261072	-6.83813453004895
chr1	26146397	26146520	+	FAM54B	FAM54B	H3k27ac	1vs<1	TSSS	3.92435514306555e-05	-13.5203302400416
chr1	26438268	26438406	+	PDIK1L	PDIK1L	H3k27ac	1vs<1	TSSS	0.00676984867737487	-5.26082370892421
chr1	32716840	32716972	+	LCK	LCK	H3k27ac	1vs<1	TSSS	0	-Inf
chr1	34632624	34632772	+	C1orf94	C1orf94	H3k27ac	1vs<1	TSSS	0	-Inf
chr1	45805571	45805629	-	MUTYH	MUTYH	H3k27ac	1vs<1	TSSS	0.00052317421009249	-8.39028209296156
chr1	46664008	46664121	-	POMGNT1	POMGNT1	H3k27ac	1vs<1	TSSS	0.0118529609243506	-4.6853895384136
chr1	61542946	61543300	+	NFIA	NFIA	H3k27ac	1vs<1	TSSS	0.00793613549935364	5.07743581698569
chr1	91966404	91966505	+	CDC7	CDC7	H3k27ac	1vs<1	TSSS	6.10247577447434e-05	-12.6072079707442
chr1	108742578	108742974	-	SLC25A24	SLC25A24	H3k27ac	1vs<1	TSSS	8.70037651809319e-05	-11.4514628277415
chr1	113249700	113250025	-	RHOC	RHOC	H3k27ac	1vs<1	TSSS	9.07681336811246e-05	-11.3020371870372
chr1	156786467	156786640	-	SH2D2A	SH2D2A	H3k27ac	1vs<1	TSSS	0.00146436732998542	8.74140121102677
chr1	212731196	212732111	+	XLOC_001289	XLOC_001289	H3k27ac	1vs<1	TSSS	0.00458105070086319	-5.65856181968429
chr1	212781994	212782272	+	ATF3	ATF3	H3k27ac	1vs<1	TSSS	0.0180420306259645	-4.3248598485288
chr1	223900119	223900579	+	CAPN2	CAPN2	H3k27ac	1vs<1	TSSS	0.000842641653955487	-7.72159576434047
chr1	17308009	17308081	-	MFAP2	MFAP2	H3k27me3	1vs<1	TSSS	0	-Inf
chr1	183387318	183387737	-	NMNAT2	NMNAT2	H3k27me3	1vs<1	TSSS	0.0028592799630235	7.01822143610196
chr1	1447910	1448070	+	ATAD3A	ATAD3A	H3k79me2	1vs<1	TSSS	0.0259145917017448	4.78289102903314
chr1	32716840	32716972	+	LCK	LCK	H3k79me2	1vs<1	TSSS	0	-Inf
chr1	113249700	113250025	-	RHOC	RHOC	H3k79me2	1vs<1	TSSS	0.000497127884950558	-9.17910461188971
chr1	156675501	156675608	-	CRABP2	CRABP2	H3k79me2	1vs<1	TSSS	0	-Inf
chr1	1550795	1551013	+	MIB2	MIB2	H2az	1vs<1	TSSS	0.00578259208946294	-6.36156595216068
chr1	32716840	32716972	+	LCK	LCK	H2az	1vs<1	TSSS	0.0132551161433773	-6.48257630822279
chr1	44496978	44497134	-	SLC6A9	SLC6A9	H2az	1vs<1	TSSS	0.0325632131530023	4.64284278946523
chr1	45805571	45805629	-	MUTYH	MUTYH	H2az	1vs<1	TSSS	0.0449857867358271	-3.89837671446812
chr1	108507288	108507545	-	VAV3	VAV3	H2az	1vs<1	TSSS	0.0281285318641029	4.35810850002816
chr1	108742578	108742974	-	SLC25A24	SLC25A24	H2az	1vs<1	TSSS	0.0471161774255861	-3.85095296137123
chr1	113249700	113250025	-	RHOC	RHOC	H2az	1vs<1	TSSS	0.0161088179092406	-5.0965298602648
chr1	183559975	183560056	-	NCF2	NCF2	H2az	1vs<1	TSSS	0.0226309083747741	-4.86971583121449
chr1	215178885	215179298	+	KCNK2	KCNK2	H2az	1vs<1	TSSS	0.0179223446140554	5.72988832501115
chr1	223900119	223900579	+	CAPN2	CAPN2	H2az	1vs<1	TSSS	0.0255259401421156	-4.44204881375355
chr1	225997797	225997871	+	EPHX1	EPHX1	H2az	1vs<1	TSSS	0.0209803341887345	-4.67951326849346
chr10	100221507	100221576	-	HPSE2	HPSE2	H3k4me1	0vs>0	SPLICING	0	-Inf
chr10	69648640	69648881	+	SIRT1	SIRT1	H3k4me1	1vs<1	SPLICING	0	-Inf
chr10	71692316	71692360	+	COL13A1	COL13A1	H3k4me2	0vs>0	SPLICING	0	-Inf
chr10	76971240	76971417	+	VDAC2	VDAC2	H3k4me2	0vs>0	SPLICING	0.0371794719594389	-3.98912953449866
chr10	13340187	13340245	-	PHYH	PHYH	H3k4me2	1vs<1	SPLICING	0	-Inf
chr10	99508026	99508121	+	ZFYVE27	ZFYVE27	H3k4me2	1vs<1	SPLICING	0	-Inf
chr10	103347003	103347163	-	POLL	POLL	H3k4me2	1vs<1	SPLICING	0.00494271065329281	-5.90770404153747
chr10	71658453	71658518	+	COL13A1	COL13A1	H3k4me3	0vs>0	SPLICING	0	-Inf
chr10	103346879	103346957	-	POLL	POLL	H3k4me3	0vs>0	SPLICING	0.0457795472554656	-3.54194339423361
chr10	103347003	103347163	-	POLL	POLL	H3k4me3	1vs<1	SPLICING	0.000261074515829896	-9.14773845527879
chr10	103346879	103346957	-	POLL	POLL	H3k9ac	0vs>0	SPLICING	0	-Inf
chr10	62547818	62547988	+	CDK1	CDK1	H3k9ac	1vs<1	SPLICING	0.000599877138717636	-7.81382631610915
chr10	71902424	71902609	-	TYSND1	TYSND1	H3k9ac	1vs<1	SPLICING	0	-Inf
chr10	103347003	103347163	-	POLL	POLL	H3k9ac	1vs<1	SPLICING	0.000172342448748363	-9.49508339608053
chr10	90767457	90767594	+	FAS	FAS	H3k9me1	1vs<1	SPLICING	0	-Inf
chr10	71902424	71902609	-	TYSND1	TYSND1	H3k9me3	1vs<1	SPLICING	0	-Inf
chr10	71658453	71658518	+	COL13A1	COL13A1	H4k20me1	0vs>0	SPLICING	0	-Inf
chr10	71692316	71692360	+	COL13A1	COL13A1	H4k20me1	0vs>0	SPLICING	0	-Inf
chr10	13386758	13387028	-	SEPHS1	SEPHS1	H4k20me1	1vs<1	SPLICING	0	-Inf
chr10	71902424	71902609	-	TYSND1	TYSND1	H4k20me1	1vs<1	SPLICING	0.0101644231060949	-4.96401392969346
chr10	73111319	73111545	+	SLC29A3	SLC29A3	H4k20me1	1vs<1	SPLICING	0	-Inf
chr10	103346879	103346957	-	POLL	POLL	H3k27ac	0vs>0	SPLICING	0	-Inf
chr10	62547818	62547988	+	CDK1	CDK1	H3k27ac	1vs<1	SPLICING	0	-Inf
chr10	103347003	103347163	-	POLL	POLL	H3k27ac	1vs<1	SPLICING	0.0030157763578006	-6.38335660864409
chr10	129913192	129914271	-	MKI67	MKI67	H3k27ac	1vs<1	SPLICING	0	-Inf
chr10	24831812	24833410	+	KIAA1217	KIAA1217	H3k27me3	0vs>0	SPLICING	0	-Inf
chr10	71692316	71692360	+	COL13A1	COL13A1	H3k27me3	0vs>0	SPLICING	0	-Inf
chr10	71700744	71700779	+	COL13A1	COL13A1	H3k27me3	0vs>0	SPLICING	0	-Inf
chr10	13340187	13340245	-	PHYH	PHYH	H3k27me3	1vs<1	SPLICING	0	-Inf
chr10	73111319	73111545	+	SLC29A3	SLC29A3	H3k27me3	1vs<1	SPLICING	0	-Inf
chr10	114849159	114849299	+	TCF7L2	TCF7L2	H3k36me3	0vs>0	SPLICING	0	-Inf
chr10	35467817	35467914	+	CREM	CREM	H3k36me3	1vs<1	SPLICING	0	-Inf
chr10	71902424	71902609	-	TYSND1	TYSND1	H3k36me3	1vs<1	SPLICING	0.0213444878459534	-4.74564542330257
chr10	71903598	71903728	-	TYSND1	TYSND1	H3k36me3	1vs<1	SPLICING	0	-Inf
chr10	99508026	99508121	+	ZFYVE27	ZFYVE27	H3k36me3	1vs<1	SPLICING	0.0308767408964192	-4.43415923897138
chr10	27060004	27060018	-	ABI1	ABI1	H3k79me2	0vs>0	SPLICING	0	-Inf
chr10	114849159	114849299	+	TCF7L2	TCF7L2	H3k79me2	0vs>0	SPLICING	0	-Inf
chr10	13340187	13340245	-	PHYH	PHYH	H3k79me2	1vs<1	SPLICING	0	-Inf
chr10	13386758	13387028	-	SEPHS1	SEPHS1	H3k79me2	1vs<1	SPLICING	0.00391788193738059	-6.2127132797767
chr10	27065994	27066170	-	ABI1	ABI1	H3k79me2	1vs<1	SPLICING	0.0232785458693025	-5.0321014508028
chr10	35437296	35437419	+	CREM	CREM	H3k79me2	1vs<1	SPLICING	0.012903062054875	-5.04078634133499
chr10	62547818	62547988	+	CDK1	CDK1	H3k79me2	1vs<1	SPLICING	0.0286412400472946	-4.18365827307923
chr10	71903598	71903728	-	TYSND1	TYSND1	H3k79me2	1vs<1	SPLICING	0.0286412400472946	-4.17567158712123
chr10	99508026	99508121	+	ZFYVE27	ZFYVE27	H3k79me2	1vs<1	SPLICING	0.000947062751921475	-7.76438488029658
chr10	103347003	103347163	-	POLL	POLL	H3k79me2	1vs<1	SPLICING	0.00881565470308232	-5.40111374057221
chr10	129913192	129914271	-	MKI67	MKI67	H3k79me2	1vs<1	SPLICING	0.0232586263849706	-4.38732402352563
chr10	24831812	24833410	+	KIAA1217	KIAA1217	H2az	0vs>0	SPLICING	0	-Inf
chr10	99393762	99393913	-	MORN4	MORN4	H3k4me1	1vs<1	TSSS	0.00113918291589038	-7.80619192361835
chr10	44144250	44144326	-	ZNF32	ZNF32	H3k4me2	1vs<1	TSSS	0.0170492178230021	-4.88033483021257
chr10	90750696	90751147	-	ACTA2	ACTA2	H3k4me2	1vs<1	TSSS	0.0143709787887876	-5.03798092112727
chr10	99393762	99393913	-	MORN4	MORN4	H3k4me2	1vs<1	TSSS	0.0409219159757404	-3.98248072984183
chr10	13341968	13342130	-	PHYH	PHYH	H3k4me3	1vs<1	TSSS	0.00147682720859315	-7.38518288971327
chr10	27530988	27531068	-	ACBD5	ACBD5	H3k4me3	1vs<1	TSSS	0.00153844851923604	-7.26995886625892
chr10	44144250	44144326	-	ZNF32	ZNF32	H3k4me3	1vs<1	TSSS	0.00429838682307662	-6.03024246833818
chr10	62761157	62761198	-	RHOBTB1	RHOBTB1	H3k4me3	1vs<1	TSSS	0	-Inf
chr10	69644427	69644909	+	SIRT1	SIRT1	H3k4me3	1vs<1	TSSS	4.95252449936555e-05	-13.2752435107515
chr10	71078603	71078766	+	HK1	HK1	H3k4me3	1vs<1	TSSS	0.035961414435135	3.79399139508346
chr10	94833232	94833591	+	CYP26A1	CYP26A1	H3k4me3	1vs<1	TSSS	0.0433544906272812	3.67703638777197
chr10	105845481	105845638	-	COL17A1	COL17A1	H3k4me3	1vs<1	TSSS	0.00545770986204934	-6.19010426571809
chr10	13341968	13342130	-	PHYH	PHYH	H3k9ac	1vs<1	TSSS	0.000805740789404552	-7.8983343953676
chr10	27530988	27531068	-	ACBD5	ACBD5	H3k9ac	1vs<1	TSSS	0.000423013703330786	-9.23421849315279
[truncated: 1,472 more rows]

## Sheet: Hmec
Chr	Start	End	Strand	GeneID	GeneName	Histone	Comparison	SplicingOrTsss	PVal	Statistic
[truncated: 1,662 more rows]

[truncated: 6 more sheets: Hsmm, Huvec, K562, MonoCD14, Nhek, Nhlf]
